# Supplementary material for: High-temperature Raman spectroscopy of K2Ca(CO3)2 bütschliite and Na2Ca2(CO3)3 shortite
Source: publisher site journal article supplement (doi:10.2138/am-2024-9500), 2024-12-19
Supplement: Supplementary file 1 [file am-2024-9500_sm.xlsx]

## Sheet: K2Ca(CO3)2 mode shifts
American Mineralogist: August 2025 Online Materials AM-25-89500 (use tabs to navigate to other tables)
ZEFF AND WILLIAMS: HIGH-TEMPERATURE RAMAN SPECTROSCOPY OF SHORTITE/BÜTSCHLIITE 1281
T_butsch_LM	LM1butsch	LM2butsch	LM3butsch	LM4butsch	T_butsch_nu4	nu4_butsch	T_fc_nu4	nu4a_fc	nu4b_fc	Tdecarb_nu4	nu4decarb	T_butsch_nu2	nu2_butsch	T_butsch_nu1	nu1_butsch	T_fc_nu1	nu1a_fc	nu1b_fc	Tnu1decarb	nu1adecarb	nu1bdecarb	T_butsch_nu3	nu3_butsch	T_butsch_OT	OT1_butsch	OT2_butsch	T_fc_OT	OT1_fc	OT2_fc
25	69.039	103.837	164.403	221.491	25	692.099	570		709.841	687	686.18	25	883.792	25	1091.21	570		1066.55	663	1052.05		25	1399.84	25	1728.77	1763.79	570	1728.7	1755.37
37	68.824	103.666	164.097	220.946	37	692.017	571		709.759	692	684.588	37	883.228	37	1090.87	572	1060.29	1068.35	687	1044.19	1050.9	37	1399.52	37	1728.57	1763.35	572	1729.72	1757.58
50	68.912	103.224	163.979	220.583	50	692.083	575		710.484	697	684.431	50	883.176	50	1090.78	580	1059.46	1068.09	692	1046.07	1050.95	50	1399.44	50	1728.58	1763.12	625		1757.97
75	68.916	102.056	163.547	219.709	75	692.024	600	687.453	708.253	702	686.374	75	882.776	75	1090.23	600		1065.83	697	1044.75	1050.86	75	1398.83	75	1728.32	1762.6	650		1756.97
100	69.06	101.727	163.141	218.851	100	691.96	612	687.726	708.721			100	882.445	100	1089.83	625		1066.62	702	1045.44	1050.7	100	1398.35	100	1728.2	1762.07	612	1730.48	1756.33
125	69.753	98.496	163.522	218.784	125	692.656	637	686.86	707.547			125	883.1	125	1089.78	650			710	1043.94	1050.78	125	1398.12	125	1728.53	1761.95	637	1729.58	1755.26
150	70.458		162.749	218.187	150	692.32						150	881.993	150	1089.19	612	1060.72	1066.91	725	1044.3	1050.66	150	1397.69	150	1728.39	1761.7	663		1754.91
175	70.917	96.939	162.669	217.147	175	692.606						175	882.481	175	1089.04	637	1059.97	1066.35	732	1043.95	1050.64	175	1397.21	175	1728.17	1760.94
200	70.762	96.268	161.875	215.883	200	692.144						200	881.916	200	1088.12	663		1066.75	740	1041.3	1049.41	200	1396.2	200	1727.87	1759.88
225	70.504	95.951	162.045	215.503	225	692.617						225	881.812	225	1088.28							225	1396.07	225	1728.73	1760.15
250	72.531	96.873	162.742	215.807	250	693.524						250	883.016	250	1088.46							250	1396.22	250	1728.59	1760.13
275	71.722	96.463	162.294	214.874	275	693.402						275	883.396	275	1087.67							275	1395.14	275	1727.93	1759.35
300	71.378	96.02	161.255	213.359	300	692.616						300	881.95	300	1086.68							300	1394.08	300	1727.12	1758.56
325	71.233	96.268	161.209	212.868	325	692.815						325	880.421	325	1086.23							325	1393.48	325	1727.54	1758.16
350	70.561	95.565	160.239	211.434	350	692.09						350	880.187	350	1085.26							350	1392.42	350	1726.51	1757.24
375	71.769	96.275	160.788	211.502	375	692.808						375	880.056	375	1085.4							375	1392.24	375	1727.08	1757.1
400	71.147	95.723	159.897	210.18	400	692.208						400	879.276	400	1084.63							400	1391.4	400	1726.43	1756.27
425	71.609	95.681	159.868	209.823	425	692.385						425	880.276	425	1084.1							425	1390.76	425	1726.75	1756.07
450	70.699	95.147	159.316	208.735	450	692.077						450	879.37	450	1083.64							450	1390.18	450	1726.35	1755.46
475	71.445	94.501	159.02	207.963	475	692.043						475	880.389	475	1083.25							475	1389.65	475	1727.52	1755.37
500	71.368	96.103	159.218	208.596	500	692.369						500	878.701	500	1082.8							500	1389.15	500	1725.7	1754.51
520	71.411	96.648	158.432	207.353	520	691.811						520	878.124	520	1082.13							520	1388.24	520	1725.41	1753.97
530	72.608	95.754	158.522	207.235	530	692.077						530	878.105	530	1081.95							530	1387.85	530	1725.39	1753.48
535	72.397	95.014	157.989	207.247	535	691.862						535	877.954	535	1081.78							535	1387.87	535	1725.75	1753.44
540	71.771	94.907	158.237	206.042	540	692.051						540	878.017	540	1081.59							540	1387.35	540	1725.76	1753.49
545	72.253	94.728	158.579	206.137	545	692.248						545	878.177	545	1081.77							545	1387.42	545	1725.99	1753.8
550	71.415	94.502	158.283	205.766	550	692.025						550	877.752	550	1081.45							550	1387.04	550	1725.32	1753.31
555	71.911	94.33	158.313	205.703	555	692.057						555	877.636	555	1081.29							555	1386.85	555	1725.47	1753.2
560	71.346	94.107	157.744	205.046	560	691.615						560	877.792	560	1081.14							560	1386.64	560	1725.72	1753.11
565	71.66	94.392	158.101	205.386	565	691.974						565	877.235	565	1081.35							565	1386.24	565	1725.72	1752.89
570	71.491	93.876	156.955	206.151	570	691.696						45	882.362	570	1081.52							570	1383.62	45	1727.62	1762.35
45	69.249	102.395	162.953	220.171	45	691.266						112	881.333	45	1089.94							45	1398.58	112	1727.13	1761.31
112	69.345	101.429	162.155	218.352	112	691.501						130	881.431	112	1089							112	1397.56	130	1727.61	1761.27
130	69.36	99.776	162.059	217.574	130	691.474						135	881.61	130	1088.69							130	1396.98	135	1727.79	1761.29
135	69.066	99.635	161.909	217.35	135	691.383						140	881.472	135	1088.61							135	1396.96	140	1727.56	1761.29
140	68.873	99.864	161.947	217.334	140	691.497						145	881.218	140	1088.55							140	1397.01	145	1727.93	1761.28
145	69.275	100.719	162.043	217.343	145	691.632						230	880.397	145	1088.66							145	1396.92	230	1727.6	1759.87
230	69.4	99.182	161.205	215.084	230	691.816						240	880.882	230	1087.4							230	1395.14	240	1727.5	1759.78
240	69.721	98.365	161.284	214.936	240	691.937						260	880.435	240	1087.24							240	1395.04	260	1727.62	1759.19
260	70.17	97.054	160.836	214.288	260	691.714						285	880.414	260	1086.79							260	1394.51	285	1727.62	1758.97
285	69.805	97.324	160.477	215.43	285	691.642						305	880.055	285	1086.32							285	1393.94	305	1727.23	1758.47
305	70.596	97.842	160.379	213.149	305	691.668						312	880.324	305	1086.02							305	1393.8	312	1726.93	1758.4
312	70.21	96.754	160.377	212.959	312	691.787						360	879.874	312	1086.02							312	1393.6	360	1726.59	1757.43
360	70.336	96.809	159.689	211.56	360	691.637						370	879.462	360	1085.04							360	1392.3	370	1726.51	1756.96
370	70.97	96.145	159.438	211.14	370	691.452						505	878.281	370	1084.69							370	1391.63	505	1725.81	1754.32
505	70.825	93.923	157.704	206.418	505	691.204						595	877.165	505	1081.6							505	1387.89	510	1724.88	1754.69
510	70.695	94.238	157.711	206.211	510	691.26								510	1081.65							510	1387.63	568	1725.87	1753.36
568	70.178	93.434	156.444	204.192	568	691.19								568	1080.62							568	1386.32	590	1725.34	1753.26
571			156.967	205.591	571	691.08								571	1080.32							590	1386.42
590	70.646	85.8	157.52	204.302	590	691.415								590	1081.11
595	72.507	92.979	157.363	204.512	595	691.106								595	1081.02

## Sheet: K2Ca(CO3)2 spectra
American Mineralogist: August 2025 Online Materials AM-25-89500 (use tabs to navigate to other tables)
ZEFF AND WILLIAMS: HIGH-TEMPERATURE RAMAN SPECTROSCOPY OF SHORTITE/BÜTSCHLIITE 1281
x100	y100	x200	y200	x300	y300	x400	y400	x500	y500	x568	y568	x571	y571	x575	y575	x590	y590	x595	y595	x612	y612	x637	y637	x663	y663	x702	y702	x725	y725
20.1168	-311.704	63.7618	-307.744	64.6332	-364.02	64.6332	-377.871	66.3737	-331.721	64.2607	-356.442	30.2391	-547.749	20.5104	128.728	24.0096	68.5805	26.7423	57.4123	20.618	39.3193	26.7423	94.3082	20.618	14.7161	20.618	-1.87589	20.618	-3.3807
20.9923	-319.169	64.6332	-166.98	65.5024	-223.59	65.5024	-235.579	67.2449	-160.67	65.1299	-207.045	31.1137	-557.073	21.3859	-29.9622	24.8848	57.6153	27.615	50.366	21.4934	-30.135	27.615	84.394	21.4934	0	21.4934	-2.7997	21.4934	-2.24346
21.8677	-325.517	65.5024	-25.4532	66.3737	-78.6237	66.3737	-86.9998	68.1138	6.85589	66.0012	-50.365	31.986	-579.345	22.2613	28.1079	25.7598	49.1213	28.4898	42.6856	22.3667	13.4956	28.4898	72.5557	22.3667	0	22.3667	0	22.3667	0
22.743	-331.599	66.3737	111.819	67.2449	65.4482	67.2449	59.9801	68.9848	157.368	66.8724	93.7744	32.8604	-591.818	23.1344	11.9154	26.6348	38.3026	29.3645	36.019	23.242	-1.154	29.3645	62.5207	23.242	0	23.242	0	23.242	0
23.6183	-334.894	67.2449	241.211	68.1138	199.028	68.1138	198.786	69.8537	280.458	67.7414	225.809	33.7347	-582.742	24.0096	-1.71896	27.5097	31.0454	30.2391	25.7667	24.1172	-4.47301	30.2391	49.3035	24.1172	0	24.1172	0	24.1172	0
24.4934	-338.403	68.1138	354.444	68.9848	314.801	68.9848	321.108	70.7245	369.626	68.6125	352.464	34.6089	-584.18	24.8848	-6.37954	28.3823	22.0919	31.1137	29.1275	24.9923	-8.93582	31.1137	43.4944	24.9923	0	24.9923	0	24.9923	0
25.3664	-340.639	68.9848	446.575	69.8537	406.37	69.8537	416.914	71.5932	420.838	69.4813	448.554	35.4809	-582.392	25.7598	-0.53238	29.2571	9.25649	31.986	27.6912	25.8673	-6.42357	31.986	38.0279	25.8673	3.23595	25.8673	0	25.8673	0
26.2414	-342.016	69.8537	507.263	70.7245	472.514	70.7245	478.873	72.4639	433.469	70.3522	511.882	36.355	-577.86	26.6348	-7.92705	30.1317	3.46715	32.8604	27.9864	26.7423	-7.73586	32.8604	34.7834	26.7423	6.92992	26.7423	0	26.7423	0
27.1163	-343.552	70.7245	541.44	71.5932	503.61	71.5932	509.089	73.3323	421.978	71.2209	537.048	37.229	-590.282	27.5097	2.0844	31.0063	4.66923	33.7347	28.0138	27.615	-4.75556	33.7347	33.7984	27.615	0	27.615	0	27.615	-14.0707
27.9912	-345.084	71.5932	542.491	72.4639	503.02	72.4639	506.722	74.2029	385.482	72.0916	522.756	38.1029	-605.643	28.3823	-0.699313	31.8807	6.1296	34.6089	29.495	28.4898	-4.49514	34.6089	31.9827	28.4898	0.378358	28.4898	0	28.4898	-2.83276
28.8659	-346.487	72.4639	517.054	73.3323	475.842	73.3323	480.113	75.0712	329.13	72.9601	476.681	38.9767	-614.523	29.2571	-6.40661	32.753	2.60036	35.4809	23.2574	29.3645	-2.74713	35.4809	32.8489	29.3645	6.50178	29.3645	0	29.3645	1.37502
29.7384	-347.693	73.3323	470.91	74.2029	426.004	74.2029	432.721	75.9416	258.599	73.8307	420.441	39.8483	-607.737	30.1317	-17.8483	33.6273	-1.48521	36.355	16.615	30.2391	-3.61347	36.355	33.5073	30.2391	0.955851	30.2391	0	30.2391	-3.77356
30.613	-348.814	74.2029	407.243	75.0712	365.138	75.0712	367.461	76.8097	182.992	74.6991	339.593	40.7219	-615.815	31.0063	-12.5064	34.5015	-4.72387	37.229	8.21805	31.1137	0.568488	37.229	33.754	31.1137	-2.09092	31.1137	0	31.1137	0
31.4876	-349.553	75.0712	327.836	75.9416	294.861	75.9416	296.436	77.6799	116.103	75.5695	256.901	41.5955	-602.22	31.8807	0.807594	35.3757	-0.171371	38.1029	0.985289	31.986	0.1651	38.1029	32.0839	31.986	-3.80349	31.986	0	31.986	0
32.362	-349.713	75.9416	249.194	76.8097	224.288	76.8097	225.619	78.548	65.972	76.4377	186.455	42.4669	-593.895	32.753	9.79489	36.2476	0.139083	38.9767	-3.33001	32.8604	5.37511	38.9767	23.3499	32.8604	3.42513	32.8604	-2.46977	32.8604	-2.87411
33.2364	-349.764	76.8097	176.059	77.6799	157.823	77.6799	163.699	79.418	30.8923	77.3079	132.966	43.3403	-599.58	33.6273	6.12237	37.1216	-0.21856	39.8483	-2.60586	33.7347	1.96588	39.8483	19.5801	33.7347	18.2707	33.7347	2.78085	33.7347	6.31684
34.1085	-349.811	77.6799	115.585	78.548	104.064	78.548	110.35	80.2858	9.83479	78.176	83.6178	44.2136	-619.263	34.5015	-6.05018	37.9955	-4.28178	40.7219	0.106429	34.6089	0.621252	40.7219	15.0383	34.6089	-1.1052	34.6089	0	34.6089	-2.2538
34.9827	-349.522	78.548	71.8158	79.418	62.1738	79.418	69.1936	81.1557	2.19562	79.0461	46.2289	45.0869	-631.484	35.3757	-9.04595	38.8694	-12.7485	41.5955	7.35126	35.4809	-2.5616	41.5955	5.55882	35.4809	0.477926	35.4809	-1.92303	35.4809	0.134401
35.8568	-349.389	79.418	39.2727	80.2858	31.4232	80.2858	36.2275	82.0234	-0.00883141	79.9139	30.9509	45.9579	-636.382	36.2476	-5.12077	39.741	-24.3123	42.4669	12.7363	36.355	-5.58446	42.4669	-1.1146	36.355	0.617321	36.355	3.39358	36.355	-34.1068
36.7308	-349.81	80.2858	15.2249	81.1557	11.9772	81.1557	17.5039	82.8931	2.74045	80.7838	17.9839	46.831	-644.639	37.1216	-8.6038	40.6146	-23.7361	43.3403	10.588	37.229	-2.91733	43.3403	0.17571	37.229	-3.32557	37.229	4.10057	37.229	-4.54895
37.6026	-350.503	81.1557	5.42954	82.0234	0.826713	82.0234	3.96777	83.7607	12.025	81.6516	-0.558451	47.704	-650.726	37.9955	-13.9457	41.4882	-21.3096	44.2136	5.08444	38.1029	-2.4799	44.2136	3.4574	38.1029	-1.63291	38.1029	0	38.1029	1.10622
38.4765	-351.109	82.0234	1.02667	82.8931	-0.0819411	82.8931	-1.68684	84.6302	30.556	82.5213	-8.56292	48.5748	-638.412	38.8694	-15.5518	42.3617	-24.5532	45.0869	-3.67892	38.9767	-1.25782	45.0869	7.45258	38.9767	-3.14634	38.9767	-5.53342	38.9767	0.289479
39.3503	-351.421	82.8931	-2.2769	83.7607	3.83095	83.7607	-0.214625	85.4976	59.1188	83.3889	-11.7638	49.4476	-636.937	39.741	-18.4889	43.233	-22.7178	45.9579	-7.76491	39.8483	1.39399	45.9579	9.44751	39.8483	-8.44335	39.8483	12.7542	39.8483	3.37036
40.224	-351.803	83.7607	-1.21463	84.6302	13.9357	84.6302	8.23573	86.367	98.6183	84.2585	-10.7695	50.3204	-637.094	40.6146	-14.8299	44.1063	-17.2439	46.831	-6.10045	40.7219	1.29016	46.831	13.2244	40.7219	-6.26282	40.7219	-3.7895	40.7219	-2.87411
41.0954	-352.569	84.6302	9.76691	85.4976	29.3674	85.4976	22.9565	87.2342	152.618	85.1259	-5.39836	51.1909	-633.988	41.4882	-10.0836	44.9796	-13.4116	47.704	-9.46667	41.5955	0.403388	47.704	19.3884	41.5955	-0.945894	41.5955	0.367638	41.5955	-26.1255
41.969	-353.056	85.4976	23.1734	86.367	52.8942	86.367	46.5267	88.1013	222	85.9953	10.3109	52.0635	-643.188	42.3617	-2.79725	45.8506	-11.6433	48.5748	-4.2363	42.4669	1.88248	48.5748	23.8149	42.4669	1.00564	42.4669	0	42.4669	-24.7401
42.8424	-353.167	86.367	44.3064	87.2342	82.5772	87.2342	80.1886	88.9704	306.816	86.8625	48.2084	52.936	-633.916	43.233	1.99868	46.7237	-13.7593	49.4476	-4.21765	43.3403	3.84666	49.4476	24.8141	43.3403	-10.126	43.3403	-8.6819	43.3403	1.76789
43.7137	-352.558	87.2342	77.3962	88.1013	123.843	88.1013	117.446	89.8374	392.499	87.7318	97.4838	53.8063	-628.335	44.1063	13.5441	47.5967	-16.3423	50.3204	-5.24463	44.2136	2.09013	50.3204	19.0725	44.2136	-16.0603	44.2136	0	44.2136	21.6592
44.587	-352.045	88.1013	117.943	88.9704	168.025	88.9704	158.322	90.7064	476.86	88.5989	156.38	54.6787	-620.9	44.9796	23.6278	48.4697	-23.1574	51.1909	-5.79543	45.0869	3.59645	51.1909	4.87018	45.0869	-8.41348	45.0869	-0.876674	45.0869	-0.568619
45.4602	-350.144	88.9704	164.438	89.8374	215.357	89.8374	202.473	91.5732	552.234	89.4659	209.887	55.5509	-622.066	45.8506	16.3323	49.3404	-28.0799	52.0635	-2.10224	45.9579	3.53348	52.0635	-4.33772	45.9579	-9.36933	45.9579	0.857821	45.9579	-15.2493
46.3333	-349.106	89.8374	211.57	90.7064	264.83	90.7064	248.123	92.4399	614.758	90.3349	247.358	56.421	-615.228	46.7237	-1.98515	50.2131	-28.3854	52.936	0.432298	46.831	2.24161	52.936	-8.52814	46.831	0.27879	46.831	6.74945	46.831	0
47.2042	-349.069	90.7064	251.284	91.5732	307.905	91.5732	292.375	93.3087	675.191	91.2017	281.65	57.2931	-578.951	47.5967	-6.70889	51.0858	-29.3764	53.8063	9.18359	47.704	-1.27314	53.8063	-7.33544	47.704	-1.2446	47.704	-1.03693	47.704	-31.4705
48.0772	-349.056	91.5732	282.375	92.4399	349.229	92.4399	333.813	94.1752	722.855	92.0706	302.957	58.1651	-556.807	48.4697	-0.148886	51.9563	-20.48	54.6787	23.998	48.5748	-0.46296	54.6787	0.0124239	48.5748	-0.995678	48.5748	1.7722	48.5748	0
48.9501	-349.217	92.4399	312.155	93.3087	385.646	93.3087	368.687	95.0438	756.707	92.9373	323.103	59.0349	-521.128	49.3404	7.95863	52.8288	-7.05848	55.5509	40.974	49.4476	0.493597	55.5509	11.0253	49.4476	3.49483	49.4476	-1.6308	49.4476	9.64585
49.8207	-349.792	93.3087	337.345	94.1752	415.706	94.1752	394.783	95.9102	777.004	93.8038	330.984	59.9068	-461.222	50.2131	22.9284	53.7013	17.2637	56.421	79.9861	50.3204	0.440834	56.421	25.0946	50.3204	13.4715	50.3204	2.59232	50.3204	-4.63166
50.6935	-349.934	94.1752	361.044	95.0438	436.989	95.0438	412.047	96.7765	783.217	94.6725	320.896	60.7765	-395.706	51.0858	32.0466	54.5715	51.7763	57.2931	124.454	51.1909	2.68585	57.2931	37.6551	51.1909	10.9425	51.1909	3.46899	51.1909	-27.3868
51.5661	-349.436	95.0438	379.776	95.9102	454.205	95.9102	420.453	97.6449	778.016	95.5389	310.29	61.6482	-313.016	51.9563	37.402	55.4438	99.4322	58.1651	178.952	52.0635	4.30281	58.1651	47.1932	52.0635	-3.8931	52.0635	1.3103	52.0635	4.80742
52.4365	-347.871	95.9102	391.437	96.7765	463.394	96.7765	418.428	98.511	760.392	96.4074	294.699	62.5198	-230.67	52.8288	44.0026	56.3138	162.494	59.0349	240.667	52.936	-0.178716	59.0349	57.7677	52.936	-0.328574	52.936	-2.89397	52.936	19.2607
53.309	-343.44	96.7765	402.554	97.6449	464.552	97.6449	406.58	99.3771	726.27	97.2736	269.546	63.3892	-135.934	53.7013	37.9298	57.186	240.793	59.9068	310.285	53.8063	0.185525	59.9068	71.1767	53.8063	1.70261	53.8063	1.86647	53.8063	30.5504
54.1814	-336.019	97.6449	408.007	98.511	456.267	98.511	388.549	100.245	680.213	98.1398	234.055	64.2607	-3.19614	54.5715	43.8898	58.058	337.198	60.7765	390.688	54.6787	5.01767	60.7765	88.7583	54.6787	-1.75239	54.6787	-1.56482	54.6787	31.9978
55.0516	-323.649	98.511	409.394	99.3771	440.671	99.3771	360.283	101.111	633.735	99.008	187.508	65.1299	140.669	55.4438	44.1424	58.9278	448.397	61.6482	479.364	55.5509	15.8496	61.6482	115.487	55.5509	5.54593	55.5509	2.75257	55.5509	12.4166
55.9238	-304.416	99.3771	398.826	100.245	418.79	100.245	328.141	101.977	594	99.8741	142.382	66.0012	307.761	56.3138	37.0455	59.7997	574.856	62.5198	575.658	56.421	29.1631	62.5198	147.82	56.421	-3.56453	56.421	0.301651	56.421	-21.8246
56.7938	-276.996	100.245	385.033	101.111	398.331	101.111	297.886	102.845	562.23	100.74	98.5507	66.8724	477.19	57.186	29.6283	60.6715	720.745	63.3892	692.68	57.2931	43.3072	63.3892	197.209	57.2931	-2.39959	57.2931	0	57.2931	-38.48
57.6659	-238.257	101.111	365.905	101.977	375.863	101.977	272.32	103.71	543.386	101.608	68.4943	67.7414	645.116	58.058	52.5432	61.5411	888.787	64.2607	827.342	58.1651	50.7844	64.2607	256.483	58.1651	4.37103	58.1651	1.81933	58.1651	-49.4595
58.5379	-186.549	101.977	342.868	102.845	355.069	102.845	254.598	104.576	533	102.474	62.0653	68.6125	790.113	58.9278	69.5523	62.4127	1079.64	65.1299	979.334	59.0349	71.8457	65.1299	329.477	59.0349	0.796543	59.0349	0	59.0349	-51.4445
59.4077	-118.381	102.845	331.444	103.71	338.62	103.71	243.124	105.444	525.199	103.339	61.5749	69.4813	911.548	59.7997	79.6089	63.2821	1302.84	66.0012	1146.73	59.9068	91.7802	66.0012	417.096	59.9068	-3.42513	59.9068	-13.0936	59.9068	-47.9398
60.2795	-28.8312	103.71	324.884	104.576	334.839	104.576	236.6	106.309	521.039	104.207	70.7417	70.3522	1011.82	60.6715	100.615	64.1536	1550.17	66.8724	1322.36	60.7765	114.559	66.8724	518.174	60.7765	-10.2356	60.7765	-0.820115	60.7765	-43.184
61.1513	73.902	104.576	328.572	105.444	332.195	105.444	234.05	107.174	510.373	105.073	72.1582	71.2209	1115.68	61.5411	125.303	65.025	1823.27	67.7414	1493.57	61.6482	137.811	67.7414	629.366	61.6482	-0.318617	61.6482	3.12021	61.6482	-37.5289
62.0208	216.715	105.444	324.509	106.309	333.726	106.309	230.616	108.042	495.582	105.938	68.0584	72.0916	1176.76	62.4127	162.714	65.8942	2111.36	68.6125	1647.63	62.5198	166.87	68.6125	768.422	62.5198	21.5365	62.5198	0	62.5198	-7.30934
62.8924	383.234	106.309	317.771	107.174	336.041	107.174	224.796	108.907	480.384	106.806	51.9269	72.9601	1209.9	63.2821	223.04	66.7654	2405.3	69.4813	1772.86	63.3892	207.9	69.4813	901.262	63.3892	65.7944	63.3892	0	63.3892	-63.8198
63.7618	556.305	107.174	311.536	108.042	336.367	108.042	216.14	109.772	475.509	107.671	21.4572	73.8307	1215.53	64.1536	285.55	67.6344	2677.4	70.3522	1852.49	64.2607	265.157	70.3522	1036.12	64.2607	135.293	64.2607	39.0073	64.2607	-93.1812
64.6332	728.378	108.042	307.977	108.907	335.829	108.907	212.587	110.639	474.207	108.536	1.92961	74.6991	1216.33	65.025	369.363	68.5055	2913.28	71.2209	1889.45	65.1299	336.017	71.2209	1159.42	65.1299	215.873	65.1299	9.9545	65.1299	-68.9063
65.5024	876.488	108.907	308.365	109.772	338.077	109.772	214.245	111.504	477.196	109.404	3.20088	75.5695	1222.01	65.8942	488.075	69.3743	3126.1	72.0916	1886.85	66.0012	432.337	72.0916	1263.21	66.0012	368.978	66.0012	-7.35275	66.0012	-14.4843
66.3737	988.711	109.772	309.423	110.639	340.987	110.639	216.68	112.369	482.614	110.269	-0.227013	76.4377	1224.66	66.7654	623.255	70.2452	3236.44	72.9601	1850.46	66.8724	547.422	72.9601	1350.61	66.8724	481.839	66.8724	-0.58445	66.8724	16.5623
67.2449	1063.13	110.639	310.082	111.504	345.417	111.504	221.855	113.234	487.821	111.134	0.640176	77.3079	1208.34	67.6344	769.307	71.1139	3279.42	73.8307	1797.98	67.7414	666.865	73.8307	1422.97	67.7414	630.473	67.7414	16.572	67.7414	0.868437
68.1138	1092.94	111.504	317.495	112.369	349.639	112.369	226.491	114.101	489.323	111.998	4.20427	78.176	1201.6	68.5055	912.22	71.9847	3262.53	74.6991	1725.62	68.6125	791.846	74.6991	1493.1	68.6125	792.032	68.6125	37.1974	68.6125	-16.2832
68.9848	1083.32	112.369	325.569	113.234	353.784	113.234	230.958	114.965	488.446	112.865	0.0953453	79.0461	1219.04	69.3743	1072.84	72.8553	3183.28	75.5695	1651.12	69.4813	921.072	75.5695	1548.1	69.4813	930.163	69.4813	249.362	69.4813	42.4397
69.8537	1046.11	113.234	331.202	114.101	358.225	114.101	234.451	115.83	483.14	113.73	7.40061	79.9139	1242.21	70.2452	1235.03	73.7238	3059.65	76.4377	1573.86	70.3522	1047.97	76.4377	1578.14	70.3522	1102.63	70.3522	487.921	70.3522	260.241
70.7245	985.033	114.101	336.884	114.965	359.605	114.965	234.323	116.694	474.961	114.595	11.8637	80.7838	1258.81	71.1139	1352.7	74.5943	2898.49	77.3079	1499.64	71.2209	1165.19	77.3079	1613.25	71.2209	1239.17	71.2209	710.361	71.2209	493.479
71.5932	904.762	114.965	339.686	115.83	358.502	115.83	232.207	117.561	464.904	115.461	13.8251	81.6516	1295.74	71.9847	1446.52	75.4626	2727.44	78.176	1436.97	72.0916	1271.43	78.176	1659.09	72.0916	1337.78	72.0916	878.644	72.0916	695.649
72.4639	815.676	115.83	336.243	116.694	354.839	116.694	229.036	118.425	455.9	116.326	9.76608	82.5213	1320.69	72.8553	1555.63	76.3329	2552.95	79.0461	1391.13	72.9601	1365.87	79.0461	1714.3	72.9601	1430	72.9601	829.768	72.9601	838.083
73.3323	725.695	116.694	330.88	117.561	352.832	117.561	224.553	119.289	448.913	117.19	2.86944	83.3889	1342.12	73.7238	1636.37	77.201	2389.41	79.9139	1359.61	73.8307	1438.75	79.9139	1771.98	73.8307	1494.82	73.8307	891.012	73.8307	995.394
74.2029	636.63	117.561	321.694	118.425	349.965	118.425	220.93	120.154	437.209	118.055	4.46307	84.2585	1365.59	74.5943	1668.15	78.0712	2228.86	80.7838	1334.08	74.6991	1494.34	80.7838	1851.17	74.6991	1541.23	74.6991	1225.52	74.6991	1051.78
75.0712	553.424	118.425	315.675	119.289	347.056	119.289	216.571	121.018	433.203	118.921	-2.29283	85.1259	1406.9	75.4626	1714.58	78.9392	2091.89	81.6516	1315.38	75.5695	1536.56	81.6516	1919.75	75.5695	1584.65	75.5695	1240.2	75.5695	1088.15
75.9416	475.775	119.289	314.287	120.154	345.615	120.154	211.698	121.884	433.212	119.785	7.5005	85.9953	1490.67	76.3329	1743.17	79.8092	1986.63	82.5213	1304.67	76.4377	1575.81	82.5213	1991.12	76.4377	1610.45	76.4377	1269.22	76.4377	1095.66
76.8097	403.812	120.154	314.152	121.018	343.474	121.018	209.831	122.748	427.551	120.649	13.8342	86.8625	1597.65	77.201	1772.65	80.677	1898.68	83.3889	1294.04	77.3079	1613.28	83.3889	2069.63	77.3079	1617.08	77.3079	1325.76	77.3079	1120.81
77.6799	343.526	121.018	311.914	121.884	341.707	121.884	209.103	123.611	422.504	121.513	25.5071	87.7318	1745.24	78.0712	1797.39	81.5468	1829.42	84.2585	1297.18	78.176	1659.83	84.2585	2149.82	78.176	1640.83	78.176	1397.87	78.176	1168.91
78.548	294.108	121.884	309.225	122.748	339.762	122.748	207.91	124.475	418.571	122.377	39.6954	88.5989	1884.63	78.9392	1832.05	82.4145	1767.13	85.1259	1304.91	79.0461	1716.79	85.1259	2253.32	79.0461	1713.62	79.0461	1478.97	79.0461	1225.74
79.418	253.846	122.748	306.011	123.611	335.843	123.611	205.707	125.339	418.971	123.243	45.3526	89.4659	2015.06	79.8092	1897.79	83.2842	1697.97	85.9953	1320.77	79.9139	1772.64	85.9953	2371.27	79.9139	1782.67	79.9139	1598.19	79.9139	1301.68
80.2858	226.018	123.611	300.826	124.475	332.781	124.475	204.907	126.205	420.728	124.107	44.0314	90.3349	2135.27	80.677	1982.23	84.1516	1639.49	86.8625	1345.64	80.7838	1830.78	86.8625	2497.61	80.7838	1895.51	80.7838	1735.89	80.7838	1484.75
81.1557	204.865	124.475	297.666	125.339	330.229	125.339	207.984	127.068	424.101	124.971	45.398	91.2017	2217.25	81.5468	2079.68	85.019	1596.55	87.7318	1377.25	81.6516	1895.9	87.7318	2652.77	81.6516	2008.79	81.6516	1855.35	81.6516	1631.5
82.0234	187.554	125.339	296.946	126.205	327.595	126.205	211.254	127.931	434.257	125.834	51.0188	92.0706	2290.59	82.4145	2169.72	85.8885	1568.58	88.5989	1436.48	82.5213	1966.97	88.5989	2800	82.5213	2098.38	82.5213	1938.34	82.5213	1734.04
82.8931	172.79	126.205	296.224	127.068	326.132	127.068	216.032	128.795	442.379	126.698	63.9313	92.9373	2328.56	83.2842	2252.09	86.7557	1538.43	89.4659	1474.87	83.3889	2043.94	89.4659	2953.55	83.3889	2126.23	83.3889	2016.39	83.3889	1814.34
83.7607	160.007	127.068	293.071	127.931	327.079	127.931	222.071	129.658	452.535	127.564	73.0436	93.8038	2343.46	84.1516	2322.97	87.625	1508.25	90.3349	1524.33	84.2585	2143.29	90.3349	3087.73	84.2585	2198.6	84.2585	2100.33	84.2585	1922.05
84.6302	148.44	127.931	291.793	128.795	331.335	128.795	226.407	130.521	459.448	128.427	79.0004	94.6725	2352.22	85.019	2311.62	88.4921	1479.67	91.2017	1557.78	85.1259	2257.04	91.2017	3202.29	85.1259	2300.7	85.1259	2230.91	85.1259	2076.75
85.4976	139.214	128.795	295.502	129.658	336.388	129.658	230.926	131.386	469.053	129.29	94.7369	95.5389	2379.23	85.8885	2503.06	89.3612	1446.58	92.0706	1584.46	85.9953	2386.28	92.0706	3300.28	85.9953	2443.32	85.9953	2398.44	85.9953	2298.96
86.367	134.595	129.658	300.792	130.521	341.683	130.521	235.912	132.249	478.782	130.153	121.874	96.4074	2385.64	86.7557	2613.33	90.2281	1416.02	92.9373	1594.82	86.8625	2530.48	92.9373	3369.57	86.8625	2628.37	86.8625	2610.96	86.8625	2522.88
87.2342	134.362	130.521	304.252	131.386	345.855	131.386	242.667	133.112	490.786	131.017	142.945	97.2736	2366.36	87.625	2765.57	91.095	1387.63	93.8038	1603.26	87.7318	2673.28	93.8038	3424.4	87.7318	2781.77	87.7318	2816.5	87.7318	2812.94
88.1013	135.998	131.386	308.067	132.249	350.628	132.249	256.21	133.975	508.171	131.88	166.768	98.1398	2326.96	88.4921	2923.5	91.9639	1381.22	94.6725	1597.07	88.5989	2812.13	94.6725	3471.04	88.5989	2998.3	88.5989	3067.65	88.5989	3080.24
88.9704	139.391	132.249	313.348	133.112	356.749	133.112	266.934	134.838	529.479	132.745	196.402	99.008	2293.53	89.3612	3094.28	92.8305	1335.06	95.5389	1589.98	89.4659	2950.03	95.5389	3508.41	89.4659	3227.24	89.4659	3304.08	89.4659	3350.55
89.8374	141.951	133.112	320.094	133.975	363.507	133.975	276.99	135.701	551.715	133.608	239.067	99.8741	2244.9	90.2281	3246.25	93.6993	1307.48	96.4074	1570.76	90.3349	3074.18	96.4074	3538.26	90.3349	3369.6	90.3349	3526.99	90.3349	3575.27
90.7064	143.606	133.975	323.752	134.838	372.674	134.838	289.969	136.563	578.259	134.47	285.3	100.74	2234.71	91.095	3364.35	94.5658	1267.98	97.2736	1535.02	91.2017	3207.15	97.2736	3561.71	91.2017	3439.79	91.2017	3712.54	91.2017	3727.12
91.5732	139.906	134.838	332.456	135.701	382.168	135.701	306.424	137.426	608.411	135.333	336.546	101.608	2241.26	91.9639	3476.45	95.4322	1226.82	98.1398	1488.6	92.0706	3318.54	98.1398	3576.72	92.0706	3506.67	92.0706	3876.48	92.0706	3806.86
92.4399	139.145	135.701	341.64	136.563	393.657	136.563	327.305	138.291	642.86	136.196	394.389	102.474	2272.9	92.8305	3564.44	96.3007	1175.16	99.008	1438.25	92.9373	3410.36	99.008	3584.45	92.9373	3575.77	92.9373	3997.69	92.9373	3920.92
93.3087	133.788	136.563	351.59	137.426	408.132	137.426	350.772	139.153	679.348	137.058	427.637	103.339	2321.52	93.6993	3636.86	97.167	1127.72	99.8741	1392.87	93.8038	3482.76	99.8741	3585.68	93.8038	3691.2	93.8038	4045.38	93.8038	3989.16
94.1752	127.667	137.426	364.921	138.291	426.353	138.291	374.905	140.015	714.786	137.921	494.315	104.207	2356.64	94.5658	3678.04	98.0353	1072.7	100.74	1356.21	94.6725	3519.78	100.74	3601.3	94.6725	3724.27	94.6725	4064.24	94.6725	3994.96
95.0438	124.187	138.291	376.172	139.153	445.049	139.153	400.335	140.877	752.351	138.783	544.921	105.073	2389.67	95.4322	3688.11	98.9014	1028.45	101.608	1324.84	95.5389	3538.15	101.608	3612.92	95.5389	3725.21	95.5389	4033.05	95.5389	4026.31
95.9102	124.806	139.153	390.137	140.015	463.272	140.015	424.995	141.74	794.918	139.646	600.798	105.938	2395.17	96.3007	3691.2	99.7674	990.316	102.474	1310.88	96.4074	3569.23	102.474	3619.2	96.4074	3694.72	96.4074	4074.08	96.4074	4021.32
96.7765	129.369	140.015	403.862	140.877	478.424	140.877	455.323	142.602	848.865	140.51	655.354	106.806	2373.16	97.167	3690.12	100.636	945.362	103.339	1306.25	97.2736	3583.92	103.339	3654.44	97.2736	3702.2	97.2736	4080.03	97.2736	3994.29
97.6449	134.94	140.877	417.152	141.74	501.008	141.74	491.092	143.464	909.591	141.372	737.591	107.671	2343.11	98.0353	3685.17	101.501	903.756	104.207	1299.32	98.1398	3586.54	104.207	3688.31	98.1398	3691.64	98.1398	4054.14	98.1398	3974.36
98.511	141.758	141.74	434.359	142.602	527.222	142.602	529.957	144.326	981.099	142.234	849.077	108.536	2324.58	98.9014	3678.53	102.367	868.968	105.073	1288.02	99.008	3579.72	105.073	3724.69	99.008	3655.76	99.008	4075.72	99.008	3952.33
99.3771	149.138	142.602	452.129	143.464	557.539	143.464	574.913	145.187	1062.57	143.096	958.942	109.404	2319.51	99.7674	3675.44	103.235	847.763	105.938	1268.19	99.8741	3569.94	105.938	3743.25	99.8741	3625.54	99.8741	4075.75	99.8741	3927.48
100.245	155.364	143.464	470.173	144.326	589.925	144.326	627.359	146.049	1151.79	143.958	1075.38	110.269	2337.85	100.636	3682.58	104.101	820.51	106.806	1256.3	100.74	3575.85	106.806	3760.25	100.74	3591.49	100.74	4082.9	100.74	3929.92
101.111	157.27	144.326	487.077	145.187	625.214	145.187	686.053	146.911	1247.45	144.82	1203.38	111.134	2366.75	101.501	3718.95	104.966	797.914	107.671	1247.47	101.608	3600.44	107.671	3776.97	101.608	3570.56	101.608	4112.61	101.608	3949.35
101.977	150.983	145.187	511.072	146.049	667.306	146.049	748.966	147.772	1362.16	145.682	1337.17	111.998	2399.19	102.367	3753.72	105.834	778.31	108.536	1233.9	102.474	3636.72	108.536	3817.55	102.474	3575.99	102.474	4099.21	102.474	3967.36
102.845	139.885	146.049	539.65	146.911	715.782	146.911	824.2	148.634	1495.58	146.544	1495.47	112.865	2406.49	103.235	3796.35	106.699	754.085	109.404	1223.5	103.339	3680.92	109.404	3849.82	103.339	3765.31	103.339	4095.56	103.339	4118.3
103.71	124.403	146.911	576.324	147.772	769.634	147.772	914.145	149.495	1656.06	147.405	1682.45	113.73	2417.55	104.101	3837.03	107.564	729.018	110.269	1219.25	104.207	3726.99	110.269	3877.57	104.207	3900.51	104.207	4135.51	104.207	4199.33
104.576	107.004	147.772	615.157	148.634	838.541	148.634	1023.02	150.357	1847.66	148.267	1888.32	114.595	2439.05	104.966	3874.55	108.432	705.475	111.134	1222.56	105.073	3758.99	111.134	3903.72	105.073	3968.95	105.073	4179.86	105.073	4277.18
105.444	89.0203	148.634	657.506	149.495	918.021	149.495	1155.72	151.218	2066.53	149.128	2103.52	115.461	2421.28	105.834	3890.12	109.297	683.456	111.998	1231.82	105.938	3784.28	111.998	3916.12	105.938	3994.86	105.938	4210.41	105.938	4348.42
106.309	72.4247	149.495	717.191	150.357	1012.87	150.357	1312.25	152.079	2312.3	149.99	2355.03	116.326	2387.49	106.699	3892.43	110.162	661.913	112.865	1241.19	106.806	3808.48	112.865	3928.12	106.806	3946.36	106.806	4211.04	106.806	4327.81
107.174	57.495	150.357	782.321	151.218	1127.72	151.218	1498.92	152.94	2577.87	150.851	2630.94	117.19	2361.4	107.564	3873.2	111.027	651.856	113.73	1237.99	107.671	3837.05	113.73	3936.76	107.671	3893.67	107.671	4189.06	107.671	4279.19
108.042	44.6861	151.218	859.729	152.079	1271.36	152.079	1719.31	153.801	2859.5	151.712	2944.42	118.055	2335.59	108.432	3867.78	111.894	646.603	114.595	1236.94	108.536	3869.19	114.595	3943.66	108.536	3870.59	108.536	4154	108.536	4168.66
108.907	34.626	152.079	958.448	152.94	1445.95	152.94	1974.21	154.662	3151.34	152.573	3254.01	118.921	2361.42	109.297	3886.61	112.759	653.081	115.461	1234.01	109.404	3901.64	115.461	3960.15	109.404	3857.96	109.404	4113.18	109.404	4123.39
109.772	27.919	152.94	1086.33	153.801	1655.9	153.801	2258.34	155.523	3430.92	153.434	3522.16	119.785	2375.29	110.162	3925.58	113.624	654.839	116.326	1221.76	110.269	3938.87	116.326	3966.62	110.269	3843.73	110.269	4096.04	110.269	4079.48
110.639	22.9417	153.801	1251.41	154.662	1912.18	154.662	2569.49	156.384	3674.92	154.295	3740.17	120.649	2398.56	111.027	3953.6	114.49	652.872	117.19	1205.18	111.134	3959.41	117.19	3958.76	111.134	3854.79	111.134	4086.96	111.134	4066.66
111.504	19.4007	154.662	1453.53	155.523	2194.8	155.523	2914.59	157.245	3869.98	155.156	3899.6	121.513	2397.16	111.894	3970.41	115.355	648.692	118.055	1192.14	111.998	3964.2	118.055	3948.44	111.998	3892.88	111.998	4094.75	111.998	4100.91
112.369	16.8447	155.523	1696.9	156.384	2521.5	156.384	3260.58	158.105	3986.6	156.017	3987.62	122.377	2348.29	112.759	3968.98	116.22	636.488	118.921	1190.98	112.865	3968.9	118.921	3937.54	112.865	3937.32	112.865	4081.33	112.865	4142.73
113.234	15.5299	156.384	1987.26	157.245	2893.22	157.245	3573.51	158.966	4017.49	156.878	4009.96	123.243	2304.38	113.624	3966.08	117.084	617.813	119.785	1199.23	113.73	3980.99	119.785	3933.03	113.73	3971.26	113.73	4050.97	113.73	4152.51
114.101	15.4899	157.245	2343.48	158.105	3268.13	158.105	3815.8	159.826	3962.3	157.739	3951.65	124.107	2310.43	114.49	3966.07	117.95	604.297	120.649	1199.16	114.595	3986.48	120.649	3938.75	114.595	3995.1	114.595	4029.14	114.595	4099.84
114.965	14.0551	158.105	2743.58	158.966	3615.12	158.966	3953.55	160.687	3837.96	158.599	3829.69	124.971	2315.38	115.355	3948.16	118.815	587.915	121.513	1196.68	115.461	3993.64	121.513	3938.05	115.461	3963.16	115.461	3997.54	115.461	4000.3
115.83	12.078	158.966	3159.68	159.826	3875.93	159.826	3986.87	161.547	3651.89	159.46	3649.67	125.834	2295.4	116.22	3926.15	119.679	585.742	122.377	1191.12	116.326	3969.19	122.377	3935.07	116.326	3894.41	116.326	3920.83	116.326	3880.07
116.694	10.3712	159.826	3544.09	160.687	3989.88	160.687	3895.97	162.407	3425.33	160.32	3446.76	126.698	2280.24	117.084	3886.7	120.543	594.932	123.243	1188.81	117.19	3959.9	123.243	3931.82	117.19	3834.12	117.19	3804.01	117.19	3728.84
117.561	8.78207	160.687	3852.76	161.547	3976.36	161.547	3715.48	163.267	3175.52	161.18	3184.16	127.564	2274.65	117.95	3874.23	121.407	596.419	124.107	1182.91	118.055	3970.43	124.107	3920.31	118.055	3808.25	118.055	3701.08	118.055	3661.43
118.425	7.26966	161.547	3993.97	162.407	3833.89	162.407	3461.11	164.127	2928.03	162.041	2933.53	128.427	2286.19	118.815	3876.56	122.273	596.399	124.971	1184.31	118.921	3975.18	124.971	3897.19	118.921	3823.57	118.921	3643.65	118.921	3599.18
119.289	5.93202	162.407	3919.06	163.267	3570.2	163.267	3161.52	164.987	2691.09	162.901	2676.71	129.29	2293.47	119.679	3886.34	123.137	596.558	125.834	1185.32	119.785	3978.68	125.834	3891.78	119.785	3796.72	119.785	3589.24	119.785	3609.42
120.154	4.31345	163.267	3688.32	164.127	3249.87	164.127	2853.25	165.847	2470.08	163.761	2434.51	130.153	2284.9	120.543	3918.72	124.001	599.32	126.698	1191.71	120.649	3979.83	126.698	3888.03	120.649	3797.05	120.649	3529.88	120.649	3655.07
121.018	3.86186	164.127	3359.48	164.987	2892.19	164.987	2555.12	166.707	2271.81	164.621	2222.39	131.017	2294.76	121.407	3922.2	124.864	607.792	127.564	1196.97	121.513	3975.74	127.564	3888.05	121.513	3778.19	121.513	3487.14	121.513	3623.69
121.884	6.09779	164.987	2974.17	165.847	2559.45	165.847	2289.88	167.567	2100.83	165.481	2017.97	131.88	2327.84	122.273	3897.37	125.728	611.825	128.427	1215.96	122.377	3948.91	128.427	3897.75	122.377	3723.44	122.377	3419.06	122.377	3501.39
122.748	5.75318	165.847	2584.84	166.707	2277.02	166.707	2059.56	168.427	1944.09	166.341	1849.93	132.745	2357.35	123.137	3859.39	126.594	620.327	129.29	1224.35	123.243	3945.08	129.29	3908.78	123.243	3711.75	123.243	3351.73	123.243	3391.26
123.611	5.57433	166.707	2227.43	167.567	2033.61	167.567	1859.22	169.284	1804.34	167.201	1721.98	133.608	2382.26	124.001	3819.91	127.457	627.124	130.153	1225.03	124.107	3933.78	130.153	3904.68	124.107	3663.42	124.107	3250.95	124.107	3278.41
124.475	2.37967	167.567	1950.4	168.427	1817.76	168.427	1680.18	170.144	1680.75	168.06	1591.69	134.47	2419.93	124.864	3783.6	128.321	634.573	131.017	1228.31	124.971	3936.08	131.017	3896.23	124.971	3643.46	124.971	3176.6	124.971	3202.85
125.339	0.0530811	168.427	1712.86	169.284	1628.31	169.284	1522.96	171.003	1573.4	168.92	1461.16	135.333	2421.84	125.728	3752.86	129.184	645.215	131.88	1245.32	125.834	3930.12	131.88	3890.3	125.834	3619.2	125.834	3106.25	125.834	3161.38
126.205	-1.29273	169.284	1504.92	170.144	1465.04	170.144	1390.14	171.862	1482.59	169.777	1340.31	136.196	2484.55	126.594	3743.11	130.047	654.107	132.745	1258.47	126.698	3944.57	132.745	3900.08	126.698	3629.41	126.698	3051.56	126.698	3191.5
127.068	-2.013	170.144	1334.89	171.003	1328.27	171.003	1278.21	172.722	1406.39	170.637	1239.04	137.058	2520	127.457	3746.9	130.91	667.985	133.608	1285.92	127.564	3965.53	133.608	3911.85	127.564	3630.2	127.564	3045.34	127.564	3201.57
127.931	-0.546327	171.003	1197.03	171.862	1218.49	171.862	1183.59	173.581	1341.64	171.496	1150.16	137.921	2525.33	128.321	3749.09	131.775	684.601	134.47	1321.09	128.427	3967.21	134.47	3925.67	128.427	3590.61	128.427	3040.79	128.427	3172.68
128.795	2.34455	171.862	1085.23	172.722	1121.72	172.722	1101.59	174.44	1281.92	172.356	1078.64	138.783	2523.92	129.184	3753.71	132.638	705.421	135.333	1354.29	129.29	3972.98	135.333	3941.09	129.29	3577.12	129.29	3020.2	129.29	3091.5
129.658	6.76008	172.722	989.854	173.581	1041.98	173.581	1029.04	175.299	1229.52	173.215	1004.87	139.646	2535.89	130.047	3730.73	133.501	729.77	136.196	1388.18	130.153	3952.26	136.196	3954.73	130.153	3514.21	130.153	2939.75	130.153	2958.25
130.521	9.82572	173.581	911.23	174.44	975.932	174.44	965.674	176.156	1186.86	174.074	945.231	140.51	2572.14	130.91	3718.62	134.364	756.596	137.058	1423.12	131.017	3950.18	137.058	3962.41	131.017	3489.09	131.017	2857.55	131.017	2894.13
131.386	11.7701	174.44	846.518	175.299	918.027	175.299	909.241	177.015	1144.01	174.933	898.87	141.372	2652.57	131.775	3719.92	135.227	789.042	137.921	1450.76	131.88	3955.64	137.921	3955.28	131.88	3469.14	131.88	2790.84	131.88	2796.61
132.249	13.4173	175.299	791.988	176.156	868.022	176.156	859.651	177.874	1113.79	175.792	857.586	142.234	2720.55	132.638	3715	136.09	827.307	138.783	1482.34	132.745	3941.79	138.783	3949.53	132.745	3475.12	132.745	2734.47	132.745	2703.3
133.112	16.3073	176.156	746.817	177.015	823.507	177.015	816.388	178.732	1086.44	176.649	827.497	143.096	2766.85	133.501	3697.66	136.952	866.976	139.646	1522.42	133.608	3923.06	139.646	3936.7	133.608	3523.68	133.608	2688.17	133.608	2640.13
133.975	19.7682	177.015	705.154	177.874	782.893	177.874	782.519	179.591	1069.19	177.508	802.64	143.958	2797.93	134.364	3675.09	137.817	909.816	140.51	1569.37	134.47	3899.54	140.51	3932.97	134.47	3574.9	134.47	2661.38	134.47	2572.1
134.838	23.6685	177.874	670.123	178.732	746.051	178.732	751.856	180.45	1055.65	178.366	784.179	144.82	2821.58	135.227	3698.26	138.679	935.604	141.372	1618.51	135.333	3926.04	141.372	3930	135.333	3555.34	135.333	2635.21	135.333	2651.31
135.701	29.6193	178.732	642.15	179.591	715.493	179.591	727.186	181.306	1043.32	179.225	771.176	145.682	2845.43	136.09	3707.95	139.542	966.714	142.234	1692.05	136.196	3949.66	142.234	3936.17	136.196	3582.08	136.196	2664.65	136.196	2746.31
136.563	35.3675	179.591	615.196	180.45	692.109	180.45	707.019	182.164	1038.43	180.084	755.793	146.544	2899.4	136.952	3729.87	140.404	1018.45	143.096	1761.94	137.058	3973.88	143.096	3927.42	137.058	3599.26	137.058	2676.25	137.058	2805.38
137.426	40.1946	180.45	592.627	181.306	674.835	181.306	691.434	183.023	1043.08	180.942	744.779	147.405	2952.62	137.817	3740.42	141.266	1074.65	143.958	1836.08	137.921	3983.12	143.958	3928.06	137.921	3589.36	137.921	2711.19	137.921	2835.02
138.291	45.1663	181.306	571.803	182.164	658.735	182.164	677.272	183.881	1052.74	181.799	741.927	148.267	3075.84	138.679	3728.59	142.128	1157.04	144.82	1916.85	138.783	3986.32	144.82	3900.92	138.783	3574.23	138.783	2706.36	138.783	2797.14
139.153	50.4932	182.164	550.299	183.023	646.519	183.023	668.488	184.739	1063.44	182.657	736.452	149.128	3205.56	139.542	3707.18	142.99	1265.22	145.682	2012.72	139.646	3971.92	145.682	3883.24	139.646	3533.28	139.646	2663.63	139.646	2721.33
140.015	55.8871	183.023	534.718	183.881	636.7	183.881	664.269	185.595	1081.44	183.515	741.673	149.99	3323.15	140.404	3712.22	143.852	1359.94	146.544	2127.53	140.51	3962	146.544	3858.44	140.51	3501.83	140.51	2614.25	140.51	2621.08
140.877	62.7027	183.881	520.48	184.739	628.018	184.739	664.891	186.453	1103.13	184.373	757.423	150.851	3450.98	141.266	3695.95	144.714	1469	147.405	2260.72	141.372	3947.22	147.405	3828.76	141.372	3506.73	141.372	2557.49	141.372	2592.12
141.74	70.2573	184.739	512.691	185.595	620.68	185.595	668.236	187.311	1126.84	185.232	777.16	151.712	3576.97	142.128	3681.66	145.576	1570.8	148.267	2408.12	142.234	3936.36	148.267	3809.5	142.234	3491.71	142.234	2497.81	142.234	2576.88
142.602	79.3424	185.595	506.86	186.453	616.169	186.453	676.067	188.169	1156.6	186.088	815.747	152.573	3685.81	142.99	3679.78	146.438	1675.82	149.128	2574.11	143.096	3924.66	149.128	3798.61	143.096	3471.36	143.096	2429.78	143.096	2510.1
143.464	90.8659	186.453	498.027	187.311	614.708	187.311	684.462	189.027	1197.79	186.945	834.399	153.434	3781.53	143.852	3663.64	147.299	1822.15	149.99	2761.06	143.958	3915.83	149.99	3784.12	143.958	3466.35	143.958	2374.26	143.958	2400.96
144.326	102.522	187.311	497.11	188.169	616.547	188.169	698.194	189.882	1245.95	187.803	860.028	154.295	3879.99	144.714	3625.68	148.161	1996.6	150.851	2963.23	144.82	3874.94	150.851	3762.08	144.82	3436.11	144.82	2313.33	144.82	2257.69
145.187	114.64	188.169	496.542	189.027	621.603	189.027	713.83	190.74	1297.74	188.661	885.059	155.156	3929.28	145.576	3594.49	149.022	2199.61	151.712	3175.59	145.682	3878.06	151.712	3740.59	145.682	3375.63	145.682	2234.69	145.682	2087.84
146.049	128.631	189.027	499.355	189.882	630.446	189.882	734.279	191.597	1352.46	189.519	919.047	156.017	3976.13	146.438	3522.96	149.884	2417.78	152.573	3396.5	146.544	3855.19	152.573	3711.05	146.544	3251.88	146.544	2142.67	146.544	1963.15
146.911	145.466	189.882	495.472	190.74	640.704	190.74	760.098	192.455	1410.6	190.374	940.532	156.878	3966.99	147.299	3451.84	150.747	2664.26	153.434	3600.18	147.405	3839.04	153.434	3681.95	147.405	3147.05	147.405	2009.69	147.405	1912.67
147.772	165.522	190.74	507.181	191.597	651.931	191.597	788.712	193.31	1475.38	191.232	976.459	157.739	3921.7	148.161	3411.62	151.608	2919.88	154.295	3769.01	148.267	3825.5	154.295	3662.29	148.267	3088.31	148.267	1933.11	148.267	1839.38
148.634	189.396	191.597	514.928	192.455	666.528	192.455	821.211	194.167	1549.28	192.09	1021.71	158.599	3847.76	149.022	3356.98	152.469	3181.63	155.156	3901.78	149.128	3797.43	155.156	3629.14	149.128	3024.62	149.128	1844.54	149.128	1877.7
149.495	218.37	192.455	522.939	193.31	684.891	193.31	856.89	195.025	1640.11	192.947	1079.04	159.46	3753.69	149.884	3339.76	153.33	3436.39	156.017	3984.58	149.99	3778.39	156.017	3614.33	149.99	2972.11	149.99	1738.77	149.99	1891.72
150.357	252.161	193.31	532.205	194.167	710.052	194.167	899.779	195.88	1734.76	193.802	1128.09	160.32	3641.67	150.747	3320.06	154.191	3657.1	156.878	4003.55	150.851	3771.84	156.878	3600.54	150.851	2979.77	150.851	1677.67	150.851	1852.22
151.218	293.696	194.167	542.92	195.025	746.109	195.025	954.052	196.737	1836.05	194.659	1192.38	161.18	3481.2	151.608	3349.88	155.052	3830.7	157.739	3963.52	151.712	3769.73	157.739	3589.29	151.712	2983.23	151.712	1652.54	151.712	1807.92
152.079	346.898	195.025	562.847	195.88	787.111	195.88	1014.79	197.594	1943.23	195.517	1263.2	162.041	3347.79	152.469	3343.27	155.913	3949.93	158.599	3881.54	152.573	3760.81	158.599	3578.63	152.573	2959.38	152.573	1633.87	152.573	1717.61
152.94	410.337	195.88	587.965	196.737	831.723	196.737	1081.2	198.451	2055.17	196.374	1336.99	162.901	3216.24	153.33	3331.11	156.774	4003.96	159.46	3758.53	153.434	3752.01	159.46	3551.67	153.434	2939.8	153.434	1624.77	153.434	1662.17
153.801	487.628	196.737	615.703	197.594	881.104	197.594	1151.61	199.305	2169.48	197.229	1424.46	163.761	3108.96	154.191	3310.05	157.635	3983.83	160.32	3602.65	154.295	3730.15	160.32	3538.33	154.295	2890.56	154.295	1610.42	154.295	1620
154.662	592.123	197.594	646.087	198.451	932.953	198.451	1231.39	200.162	2283.4	198.086	1501.18	164.621	3007.46	155.052	3291.17	158.493	3903.55	161.18	3418.16	155.156	3708.09	161.18	3500.8	155.156	2797.16	155.156	1578.18	155.156	1585.98
155.523	716.868	198.451	679.849	199.305	991.667	199.305	1317.42	201.019	2399.79	198.942	1567.55	165.481	2899.57	155.913	3266.36	159.354	3768.89	162.041	3240.73	156.017	3673.43	162.041	3475.06	156.017	2756.11	156.017	1515.2	156.017	1571.85
156.384	881.551	199.305	724.746	200.162	1057.88	200.162	1411.08	201.873	2515.24	199.797	1637.33	166.341	2806.14	156.774	3252.39	160.214	3594.79	162.901	3050.86	156.878	3636.65	162.901	3449.84	156.878	2732.81	156.878	1481	156.878	1585.9
157.245	1105.09	200.162	773.89	201.019	1129.56	201.019	1508.9	202.73	2621.44	200.654	1703.09	167.201	2676.79	157.635	3251.7	161.074	3395.82	163.761	2869.43	157.739	3608.39	163.761	3426.41	157.739	2724.6	157.739	1480	157.739	1590.58
158.105	1401.28	201.019	827.924	201.873	1208.77	201.873	1608.77	203.586	2710.78	201.51	1749	168.06	2632.2	158.493	3239.25	161.935	3168.71	164.621	2697.17	158.599	3593.98	164.621	3391	158.599	2728.43	158.599	1478.24	158.599	1607.06
158.966	1803.92	201.873	886.509	202.73	1296.33	202.73	1710.29	204.441	2797.51	202.365	1766.59	168.92	2552.2	159.354	3229.21	162.795	2932.1	165.481	2535.17	159.46	3582.44	165.481	3360.46	159.46	2697.92	159.46	1477.21	159.46	1568.83
159.826	2296.13	202.73	949.591	203.586	1394.95	203.586	1817.08	205.297	2861.83	203.221	1748.81	169.777	2474.76	160.214	3218.09	163.655	2719.27	166.341	2401.43	160.32	3560.24	166.341	3335.72	160.32	2714.49	160.32	1473.91	160.32	1528.85
160.687	2860.5	203.586	1021.32	204.441	1500.13	204.441	1921.21	206.153	2906.13	204.078	1750.91	170.637	2388.33	161.074	3186.24	164.515	2535.73	167.201	2273.24	161.18	3525.74	167.201	3311.63	161.18	2726.78	161.18	1409.53	161.18	1458.95
161.547	3472.49	204.441	1100.07	205.297	1610.69	205.297	2021.31	207.007	2932.12	204.932	1735.23	171.496	2324.5	161.935	3159.12	165.375	2369.86	168.06	2165.83	162.041	3488.33	168.06	3288.06	162.041	2696.6	162.041	1338.81	162.041	1407.58
162.407	3912.42	205.297	1196.05	206.153	1726.16	206.153	2115.4	207.863	2937.49	205.788	1731.95	172.356	2278.21	162.795	3129.94	166.235	2202.37	168.92	2077.74	162.901	3436.99	168.92	3263.32	162.901	2606.79	162.901	1226.13	162.901	1365.12
163.267	3998.29	206.153	1298.24	207.007	1848.16	207.007	2196.59	208.719	2923.86	206.644	1712.36	173.215	2224.61	163.655	3088.82	167.095	2056.75	169.777	1994.72	163.761	3411.21	169.777	3228.83	163.761	2551.41	163.761	1164.67	163.761	1320.16
164.127	3704.24	207.007	1408.17	207.863	1969.53	207.863	2259.7	209.573	2888.33	207.498	1675.64	174.074	2194.75	164.515	3066.81	167.954	1934.21	170.637	1928.47	164.621	3383.2	170.637	3194.37	164.621	2497.25	164.621	1130.43	164.621	1255.07
164.987	3207.41	207.863	1539.51	208.719	2090.18	208.719	2305.71	210.429	2831.54	208.354	1616.11	174.933	2150.42	165.375	3028.37	168.814	1834.3	171.496	1863.66	165.481	3360.99	171.496	3166.03	165.481	2484.09	165.481	1110.93	165.481	1242.15
165.847	2639.67	208.719	1683.4	209.573	2200.49	209.573	2326.93	211.282	2763.67	209.21	1557.87	175.792	2124.33	166.235	3000.61	169.674	1755.89	172.356	1800.85	166.341	3331.36	172.356	3112.61	166.341	2486.43	166.341	1142.38	166.341	1262.82
166.707	2130.45	209.573	1836.69	210.429	2296.54	210.429	2325.19	212.138	2675.79	210.064	1514.18	176.649	2102.05	167.095	2977.73	170.533	1680.43	173.215	1741.81	167.201	3306.87	173.215	3099.93	167.201	2507.58	167.201	1165.16	167.201	1280.68
167.567	1704.04	210.429	1999.76	211.282	2370.84	211.282	2299.81	212.993	2580.1	210.92	1462.18	177.508	2069.95	167.954	2973.17	171.39	1604.64	174.074	1694.92	168.06	3284.74	174.074	3059.81	168.06	2496.79	168.06	1181.96	168.06	1236.45
168.427	1407.67	211.282	2163.7	212.138	2419.66	212.138	2252.54	213.847	2481.58	211.775	1398.44	178.366	2032.04	168.814	2964.3	172.25	1530.83	174.933	1653.45	168.92	3260.56	174.933	3010	168.92	2427.9	168.92	1177.37	168.92	1180.82
169.284	1155.41	212.138	2316.7	212.993	2439.99	212.993	2175.27	214.702	2378.47	212.629	1329.6	179.225	2003.69	169.674	2934.88	173.109	1485.05	175.792	1622.53	169.777	3235.2	175.792	2972.38	169.777	2329.88	169.777	1170.3	169.777	1146.76
170.144	955.004	212.993	2453.39	213.847	2431.55	213.847	2093.6	215.556	2274.99	213.484	1258.59	180.084	1976.25	170.533	2917.99	173.968	1433.57	176.649	1601.07	170.637	3208.92	176.649	2950.05	170.637	2279.3	170.637	1145.4	170.637	1121.68
171.003	804.505	213.847	2562.93	214.702	2397.12	214.702	1996.11	216.411	2175.3	214.338	1176.64	180.942	1954.5	171.39	2889.2	174.827	1394.65	177.508	1578.11	171.496	3177.08	177.508	2914.93	171.496	2292.8	171.496	1093.88	171.496	1068.52
171.862	692.816	214.702	2638.8	215.556	2332.62	215.556	1891.18	217.266	2078.05	215.193	1093.07	181.799	1931.56	172.25	2854.72	175.686	1366.57	178.366	1559.1	172.356	3157.02	178.366	2891.6	172.356	2353.63	172.356	1051.2	172.356	990.255
172.722	604.962	215.556	2669.78	216.411	2242.05	216.411	1780.82	218.119	1985.3	216.048	1014.62	182.657	1912.58	173.109	2817.75	176.545	1347.13	179.225	1541.97	173.215	3143.61	179.225	2867.52	173.215	2381.9	173.215	997.109	173.215	952.003
173.581	531.566	216.411	2654.51	217.266	2129.5	217.266	1670.68	218.974	1896.8	216.902	948.195	183.515	1867.54	173.968	2809.73	177.404	1320.77	180.084	1527.6	174.074	3107.76	180.084	2840.19	174.074	2403	174.074	967.867	174.074	996.81
174.44	473.735	217.266	2599.89	218.119	2008.05	218.119	1563.31	219.827	1811.59	217.757	896.033	184.373	1919.09	174.827	2805.22	178.261	1292.1	180.942	1516.77	174.933	3060.58	180.942	2811.81	174.933	2365.71	174.933	955.132	174.933	1006.33
175.299	426.238	218.119	2506.91	218.974	1882.87	218.974	1459.63	220.682	1728.18	218.61	854.335	185.232	1885.01	175.686	2770.41	179.119	1269.45	181.799	1511.99	175.792	3009.34	181.799	2783.84	175.792	2333.66	175.792	955.443	175.792	1021.88
176.156	386.74	218.974	2381.1	219.827	1757.88	219.827	1362.04	221.534	1651.2	219.465	816.083	186.088	1873.83	176.545	2709.36	179.978	1264.1	182.657	1511.22	176.649	2963.56	182.657	2745.3	176.649	2283.86	176.649	959.685	176.649	1061.69
177.015	353.548	219.827	2231.34	220.682	1636.86	220.682	1270.06	222.389	1576.77	220.317	761.827	186.945	1868.45	177.404	2667.06	180.837	1262.29	183.515	1511.37	177.508	2904	183.515	2667.37	177.508	2219.65	177.508	939.116	177.508	1053.37
177.874	326.012	220.682	2070.79	221.534	1525.38	221.534	1182.79	223.242	1505.18	221.172	714.527	187.803	1852.23	178.261	2635.94	181.695	1269.99	184.373	1519.54	178.366	2878.68	184.373	2651.87	178.366	2137.17	178.366	916.417	178.366	1001.36
178.732	302.49	221.534	1914.28	222.389	1419.06	222.389	1104.85	224.096	1437.3	222.027	667.812	188.661	1852.06	179.119	2603.75	182.551	1286.01	185.232	1532.91	179.225	2854.53	185.232	2614.34	179.225	2095.53	179.225	866.72	179.225	968.979
179.591	281.77	222.389	1762.98	223.242	1319.56	223.242	1034.68	224.948	1373.28	222.88	625.751	189.519	1861.13	179.978	2580.65	183.41	1306.8	186.088	1544.14	180.084	2826.34	186.088	2574.94	180.084	2060.93	180.084	838.497	180.084	937.974
180.45	263.451	223.242	1618.06	224.096	1221.7	224.096	965.054	225.803	1309.63	223.734	585.039	190.374	1855.17	180.837	2570.15	184.268	1327.28	186.945	1553.44	180.942	2798.83	186.945	2542.29	180.942	2026.34	180.942	823.659	180.942	947.258
181.306	247.556	224.096	1483.67	224.948	1135.1	224.948	900.348	226.657	1253.55	224.586	555.173	191.232	1869.73	181.695	2548.77	185.126	1345.27	187.803	1573.9	181.799	2779.87	187.803	2505.87	181.799	2002.08	181.799	790.232	181.799	905.852
182.164	234.454	224.948	1364.54	225.803	1056.18	225.803	838.777	227.509	1202.03	225.441	518.856	192.09	1901.43	182.551	2506.44	185.984	1363.49	188.661	1616.3	182.657	2757.91	188.661	2475.47	182.657	1947.25	182.657	757.663	182.657	874.805
183.023	221.711	225.803	1258.9	226.657	982.126	226.657	783.274	228.363	1151.81	226.293	480.363	192.947	1958.04	183.41	2460.16	186.84	1388.43	189.519	1652.69	183.515	2716.95	189.519	2432.31	183.515	1911.29	183.515	727.225	183.515	844.472
183.881	210.536	226.657	1160.62	227.509	913.731	227.509	733.465	229.215	1104.14	227.147	446.616	193.802	1993.16	184.268	2449.25	187.698	1421.19	190.374	1691.02	184.373	2676.29	190.374	2402.24	184.373	1857.93	184.373	743.787	184.373	801.939
184.739	202.813	227.509	1070.15	228.363	851.251	228.363	688.131	230.069	1058.21	228	410.425	194.659	1989.43	185.126	2418.14	188.556	1466.12	191.232	1726.31	185.232	2645.25	191.232	2373.92	185.232	1846.85	185.232	744.051	185.232	829.274
185.595	198.242	228.363	984.997	229.215	794.315	229.215	646.895	230.921	1010.76	228.854	380.228	195.517	1986.78	185.984	2397.94	189.413	1518.24	192.09	1783.24	186.088	2609.12	192.09	2344.02	186.088	1893.6	186.088	742.1	186.088	843.924
186.453	194.016	229.215	906.736	230.069	744.465	230.069	607.122	231.773	962.92	229.706	359.03	196.374	1997.88	186.84	2367.23	190.271	1575.25	192.947	1845.25	186.945	2562.24	192.947	2313.55	186.945	1910.02	186.945	725.773	186.945	803.335
187.311	190.613	230.069	839.172	230.921	698.442	230.921	566.78	232.627	916.373	230.56	339.279	197.229	2017.69	187.698	2326.66	191.126	1647.9	193.802	1897.8	187.803	2521.04	193.802	2273.02	187.803	1877.1	187.803	682.515	187.803	713.452
188.169	188.994	230.921	779.726	231.773	655.075	231.773	531.303	233.478	875.702	231.411	320.242	198.086	2037.79	188.556	2307.25	191.984	1726.98	194.659	1947.15	188.661	2483.43	194.659	2233.72	188.661	1882.03	188.661	632.214	188.661	700.901
189.027	189.668	231.773	725.252	232.627	613.787	232.627	497.229	234.332	835.034	232.265	303.402	198.942	2054.19	189.413	2274.98	192.841	1787.7	195.517	1998.58	189.519	2445.96	195.517	2197.47	189.519	1872.18	189.519	613.908	189.519	581.884
189.882	191.023	232.627	676.488	233.478	571.525	233.478	467.094	235.183	792.763	233.117	290.118	199.797	2082.79	190.271	2252.64	193.699	1843.39	196.374	2049.43	190.374	2412.53	196.374	2160.68	190.374	1838.15	190.374	626.059	190.374	668.541
190.74	192.07	233.478	628.04	234.332	531.606	234.332	437.992	236.037	751.633	233.97	281.137	200.654	2112.54	191.126	2225.17	194.554	1882.51	197.229	2105.44	191.232	2375.15	197.229	2134.28	191.232	1788.81	191.232	643.347	191.232	676.595
191.597	193.913	234.332	580.349	235.183	494.797	235.183	412.724	236.888	716.082	234.822	271.861	201.51	2132.56	191.984	2205.21	195.411	1966.87	198.086	2165.74	192.09	2335.88	198.086	2103.45	192.09	1752.3	192.09	664.236	192.09	661.997
192.455	195.919	235.183	536.496	236.037	451.473	236.037	387.015	237.741	686.677	235.675	259.675	202.365	2134.56	192.841	2171.36	196.268	2055.39	198.942	2228.84	192.947	2293.99	198.942	2066.7	192.947	1726.04	192.947	667.771	192.947	610.563
193.31	199.115	236.037	497.473	236.888	424.957	236.888	364.948	238.592	662.548	236.527	241.619	203.221	2111.45	193.699	2144.86	197.123	2167.35	199.797	2293.03	193.802	2252.15	199.797	2031.7	193.802	1722.49	193.802	640.802	193.802	580.633
194.167	207.028	236.888	462.33	237.741	397.07	237.741	341.189	239.444	635.144	237.378	221.278	204.078	2072.12	194.554	2110.23	197.98	2256.97	200.654	2366.31	194.659	2212.57	200.654	1998.58	194.659	1700.06	194.659	597.694	194.659	541.646
195.025	218.084	237.741	429.962	238.592	377.102	238.592	317.827	240.297	608.51	238.231	207.83	204.932	2058.62	195.411	2070.86	198.837	2341.61	201.51	2418.84	195.517	2167.67	201.51	1965.78	195.517	1653.29	195.517	556.434	195.517	512.243
195.88	233.251	238.592	398.001	239.444	355.771	239.444	295.037	241.147	578.647	239.082	180.866	205.788	2066.54	196.268	2046.71	199.694	2413.27	202.365	2458.89	196.374	2141.51	202.365	1939.64	196.374	1583.62	196.374	518.067	196.374	538.772
196.737	249.011	239.444	367.752	240.297	331.975	240.297	277.858	242	554.52	239.935	164.244	206.644	2027.19	197.123	2023.87	200.548	2480.81	203.221	2476.98	197.229	2112.92	203.221	1914.84	197.229	1573.77	197.229	489.09	197.229	521.806
197.594	268.661	240.297	341.936	241.147	312.721	241.147	262.947	242.851	532.724	240.786	146.323	207.498	1983.63	197.98	2000.79	201.405	2530.14	204.078	2480.63	198.086	2089.21	204.078	1882.38	198.086	1541.43	198.086	472.886	198.086	506.919
198.451	283.558	241.147	320.638	242	296.373	242	249.775	243.704	508.414	241.639	138.164	208.354	1946.29	198.837	1989.42	202.262	2575.21	204.932	2471.65	198.942	2066.58	204.932	1855.62	198.942	1505.13	198.942	460.829	198.942	533.871
199.305	302.898	242	301.624	242.851	280.009	242.851	236.001	244.554	487.568	242.49	136.925	209.21	1909.76	199.694	1977.06	203.116	2596.93	205.788	2447.87	199.797	2042.73	205.788	1829.73	199.797	1488.78	199.797	462.516	199.797	525.983
200.162	325.734	242.851	285.069	243.704	261.033	243.704	222.299	245.405	465.048	243.34	141.842	210.064	1861.31	200.548	1963.45	203.972	2609.74	206.644	2409.15	200.654	2020.42	206.644	1801.9	200.654	1496.27	200.654	487.751	200.654	496.239
201.019	350.841	243.704	269.025	244.554	243.699	244.554	207.689	246.257	447.396	244.193	132.071	210.92	1797.11	201.405	1939.35	204.829	2612.67	207.498	2359.44	201.51	2002.4	207.498	1767.31	201.51	1495.14	201.51	505.473	201.51	480.855
201.873	380.568	244.554	250.249	245.405	227.085	245.405	194.613	247.108	423.365	245.044	116.612	211.775	1728.1	202.262	1917.21	205.683	2606.99	208.354	2302.48	202.365	1982.09	208.354	1729.52	202.365	1447.28	202.365	501.976	202.365	465.017
202.73	415.009	245.405	233.752	246.257	213.637	246.257	180.615	247.958	404.245	245.896	106.991	212.629	1674.34	203.116	1878.73	206.539	2584.73	209.21	2239.37	203.221	1950.88	209.21	1705.01	203.221	1448.68	203.221	489.231	203.221	468.894
203.586	455.126	246.257	216.679	247.108	200.854	247.108	168.151	248.81	385.096	246.747	100.676	213.484	1613.01	203.972	1826.8	207.395	2545.56	210.064	2166	204.078	1911.97	210.064	1681.57	204.078	1398.81	204.078	475.026	204.078	486.986
204.441	500.843	247.108	200.721	247.958	186.93	247.958	158.974	249.66	367.306	247.597	88.8346	214.338	1576.03	204.829	1817.95	208.249	2494.22	210.92	2087.7	204.932	1878.21	210.92	1649.23	204.932	1348.63	204.932	467.352	204.932	503.486
205.297	552.988	247.958	184.419	248.81	175.434	248.81	149.783	250.51	354.421	248.449	78.7234	215.193	1524.35	205.683	1810.59	209.105	2425.44	211.775	2018.3	205.788	1831.87	211.775	1626.15	205.788	1346.84	205.788	432.889	205.788	504.252
206.153	610.369	248.81	170.735	249.66	163.485	249.66	140.532	251.362	342.629	249.299	75.9584	216.048	1470.26	206.539	1786.16	209.961	2329.52	212.629	1953.83	206.644	1795.92	212.629	1600.91	206.644	1348.73	206.644	409.228	206.644	476.224
207.007	676.54	249.66	159.803	250.51	152.352	250.51	130.684	252.212	328.497	250.149	72.9301	216.902	1465.74	207.395	1760.8	210.814	2229.95	213.484	1885.81	207.498	1760.45	213.484	1566.65	207.498	1350.9	207.498	370.569	207.498	425.1
207.863	755.874	250.51	147.6	251.362	145.015	251.362	123.408	253.064	315.052	251.001	66.5919	217.757	1429.6	208.249	1732.32	211.67	2090.85	214.338	1814.07	208.354	1728.34	214.338	1533.09	208.354	1367.66	208.354	372.012	208.354	328.3
208.719	847.383	251.362	137.867	252.212	136.564	252.212	116.056	253.914	301.643	251.851	66.5056	218.61	1384.25	209.105	1708.13	212.524	2014.87	215.193	1739.36	209.21	1693.54	215.193	1504.16	209.21	1364.32	209.21	384.926	209.21	267.044
209.573	953.986	252.212	129.23	253.064	127.148	253.064	106.759	254.764	289.835	252.701	56.8122	219.465	1344.71	209.961	1687.2	213.379	1920.51	216.048	1660.89	210.064	1662.67	216.048	1474.46	210.064	1342.79	210.064	355.477	210.064	229.836
210.429	1080.86	253.064	120.397	253.914	123.924	253.914	98.2438	255.613	277.622	253.553	46.6647	220.317	1307.45	210.814	1667.55	214.235	1818.87	216.902	1593.47	210.92	1634.63	216.902	1448.87	210.92	1235.88	210.92	319.788	210.92	193.672
211.282	1223.58	253.914	110.104	254.764	115.792	254.764	91.2376	256.465	265.927	254.403	36.2539	221.172	1259.4	211.67	1638.21	215.088	1726.31	217.757	1521.06	211.775	1609.37	217.757	1434.77	211.775	1212.79	211.775	322.446	211.775	210.761
212.138	1382.58	254.764	101.974	255.613	103.385	255.613	84.3597	257.314	254.491	255.252	37.7431	222.027	1210.89	212.524	1609.93	215.943	1645.19	218.61	1455.68	212.629	1586.64	218.61	1413.06	212.629	1180.57	212.629	327.952	212.629	284.764
212.993	1560.19	255.613	89.5212	256.465	91.7927	256.465	77.9083	258.163	242.851	256.104	33.2846	222.88	1162.99	213.379	1568.58	216.796	1563.02	219.465	1396.12	213.484	1573.75	219.465	1392.98	213.484	1173.83	213.484	355.515	213.484	347.22
213.847	1758.34	256.465	76.0634	257.314	80.6511	257.314	70.8026	259.015	236.144	256.953	44.5762	223.734	1126.3	214.235	1530.51	217.651	1480.76	220.317	1341.69	214.338	1551.25	220.317	1370.8	214.338	1186.1	214.338	352.008	214.338	430.341
214.702	1980.97	257.314	65.7098	258.163	73.0906	258.163	63.5179	259.864	228.786	257.803	50.2334	224.586	1092.61	215.088	1491.45	218.506	1394.87	221.172	1292.71	215.193	1527.57	221.172	1343.92	215.193	1133.01	215.193	307.072	215.193	460.085
215.556	2200.17	258.163	62.2083	259.015	66.4778	259.015	57.0343	260.713	220.206	258.654	34.5468	225.441	1050.16	215.943	1472.22	219.359	1314.62	222.027	1241.15	216.048	1502.81	222.027	1316.78	216.048	1151.13	216.048	307.76	216.048	477.423
216.411	2404.41	259.015	59.3576	259.864	60.9544	259.864	50.9518	261.562	212.716	259.503	28.1496	226.293	1034.03	216.796	1472.18	220.214	1236.44	222.88	1190.88	216.902	1473.29	222.88	1303.95	216.902	1120.03	216.902	313.246	216.902	424.324
217.266	2574.7	259.864	53.9024	260.713	57.7287	260.713	47.4049	262.413	205.531	260.352	31.9225	227.147	1004.93	217.651	1444.78	221.067	1167.46	223.734	1141.96	217.757	1439.84	223.734	1288.17	217.757	1132.16	217.757	311.794	217.757	339.724
218.119	2666.34	260.713	48.9698	261.562	53.4516	261.562	45.1941	263.262	199.362	261.203	35.9043	228	979.068	218.506	1423.87	221.922	1106.08	224.586	1094.33	218.61	1399.4	224.586	1261.35	218.61	1132.36	218.61	314.726	218.61	296.623
218.974	2683.78	261.562	44.7834	262.413	47.6078	262.413	42.7168	264.111	192.992	262.052	37.7477	228.854	956.911	219.359	1414.02	222.774	1046.46	225.441	1048.12	219.465	1371.84	225.441	1236.94	219.465	1102.58	219.465	271.005	219.465	314.829
219.827	2625.45	262.413	41.0469	263.262	44.0364	263.262	39.6454	264.961	185.12	262.901	39.196	229.706	909.608	220.214	1407.13	223.629	990.996	226.293	1005.48	220.317	1344.69	226.293	1216.2	220.317	1067.02	220.317	236.466	220.317	296.54
220.682	2504.37	263.262	39.6102	264.111	41.1815	264.111	37.2424	265.81	176.325	263.75	40.8804	230.56	865.399	221.067	1383.7	224.481	944.423	227.147	967.327	221.172	1324.69	227.147	1192.68	221.172	1033.08	221.172	232.29	221.172	254.038
221.534	2332.72	264.111	38.6903	264.961	38.9236	264.961	31.8186	266.659	168.221	264.601	39.0734	231.411	831.024	221.922	1353.98	225.336	895.498	228	928.549	222.027	1308.96	228	1169.57	222.027	1031.01	222.027	227.068	222.027	230.353
222.389	2110.93	264.961	33.1198	265.81	35.5381	265.81	28.0739	267.507	161.275	265.45	28.6308	232.265	810.718	222.774	1331.1	226.188	849.36	228.854	904.678	222.88	1291.1	228.854	1144.44	222.88	1006.53	222.88	233.035	222.88	228.936
223.242	1890.21	265.81	28.4905	266.659	28.0117	266.659	23.2048	268.355	159.977	266.298	12.3268	233.117	776.003	223.629	1323.9	227.042	806.418	229.706	871.579	223.734	1260.2	229.706	1120.41	223.734	986.767	223.734	237.937	223.734	177.058
224.096	1692.44	266.659	24.5675	267.507	26.2122	267.507	20.7948	269.206	156.916	267.147	6.74682	233.97	769.019	224.481	1305.17	227.896	770.959	230.56	836.253	224.586	1236.38	230.56	1093.96	224.586	969.731	224.586	222.883	224.586	195.378
224.948	1508.66	267.507	21.3536	268.355	24.5539	268.355	17.7466	270.054	153.574	267.997	2.44266	234.822	769.155	225.336	1283.3	228.748	737.408	231.411	799.133	225.441	1212.01	231.411	1086.84	225.441	940.279	225.441	137.506	225.441	199.492
225.803	1346.34	268.355	17.8678	269.206	22.6717	269.206	17.0438	270.902	150.441	268.846	-2.39271	235.675	775.378	226.188	1263.09	229.602	713.125	232.265	774.189	226.293	1192.21	232.265	1076.58	226.293	911.902	226.293	89.204	226.293	186.424
226.657	1194.48	269.206	12.1876	270.054	19.8062	270.054	16.8074	271.75	147.356	269.694	-7.72751	236.527	766.988	227.042	1231.07	230.454	679.204	233.117	755.534	227.147	1171.73	233.117	1059.89	227.147	899.854	227.147	89.6847	227.147	138.609
227.509	1066.05	270.054	6.09026	270.902	17.3058	270.902	17.5621	272.6	142.902	270.542	-4.6583	237.378	756.131	227.896	1201.22	231.306	634.821	233.97	739.41	228	1153.18	233.97	1039.13	228	882.549	228	97.4994	228	98.8157
228.363	953.981	270.902	6.86204	271.75	14.8914	271.75	16.0871	273.448	139.196	271.392	-1.8161	238.231	732.194	228.748	1180.25	232.16	605.999	234.822	715.405	228.854	1121.69	234.822	1016.11	228.854	862.895	228.854	92.9181	228.854	103.282
229.215	857.277	271.75	7.00016	272.6	12.1946	272.6	12.8495	274.296	134.868	272.24	4.31778	239.082	698.853	229.602	1169.87	233.012	588.104	235.675	692.952	229.706	1105.07	235.675	989.204	229.706	856.592	229.706	107.906	229.706	91.558
230.069	773.913	272.6	3.52144	273.448	7.55805	273.448	9.1798	275.144	131.714	273.088	2.1657	239.935	674.048	230.454	1149.18	233.865	562.696	236.527	671.346	230.56	1090.71	236.527	972.712	230.56	878.258	230.56	133.123	230.56	105.329
230.921	700.391	273.448	3.4773	274.296	7.49802	274.296	6.2038	275.992	129.968	273.936	1.30305	240.786	655.17	231.306	1123.13	234.717	535.883	237.378	660.679	231.411	1074.43	237.378	957.938	231.411	886.492	231.411	166.163	231.411	144.822
231.773	636.282	274.296	4.89129	275.144	4.52461	275.144	3.45785	276.839	128.216	274.784	1.99771	241.639	633.103	232.16	1107.23	235.57	508.677	238.231	644.604	232.265	1056.59	238.231	940.385	232.265	898.829	232.265	179.454	232.265	212.271
232.627	578.969	275.144	4.80158	275.992	4.98056	275.992	2.13714	277.689	124.441	275.634	-1.87966	242.49	618.075	233.012	1095.58	236.421	481.417	239.082	623.404	233.117	1031.73	239.082	921.156	233.117	900.282	233.117	164.532	233.117	281.239
233.478	526.263	275.992	2.99173	276.839	2.73164	276.839	1.21972	278.536	122.469	276.481	0.254254	243.34	603.247	233.865	1086.4	237.275	466.128	239.935	599.927	233.97	1017.96	239.935	903.205	233.97	896.14	233.97	166.907	233.97	306.258
234.332	477.924	276.839	0.00996769	277.689	0.948407	277.689	-0.477647	279.384	118.829	277.329	-0.0862648	244.193	594.201	234.717	1082.57	238.126	447.113	240.786	570.829	234.822	1001.68	240.786	880.501	234.822	870.9	234.822	158.999	234.822	265.7
235.183	433.669	277.689	-2.17723	278.536	0.247446	278.536	-2.3181	280.231	116.469	278.176	1.61633	245.044	588.488	235.57	1077.49	238.979	427.967	241.639	549.401	235.675	989.959	241.639	873.139	235.675	841	235.675	146.423	235.675	165.613
236.037	393.943	278.536	-3.49296	279.384	2.09883	279.384	-3.42559	281.078	114.436	279.024	1.89783	245.896	601.597	236.421	1065.51	239.83	413.731	242.49	529.038	236.527	968.738	242.49	862.664	236.527	804.16	236.527	143.765	236.527	91.4546
236.888	361.206	279.384	-3.19963	280.231	3.78227	280.231	-3.90113	281.925	113.026	279.871	-2.11122	246.747	596.685	237.275	1031.75	240.681	400.848	243.34	511.492	237.378	936.21	243.34	850.084	237.378	777.754	237.378	124.45	237.378	65.7531
237.741	329.066	280.231	3.78345	281.078	3.76118	281.078	-3.13101	282.772	111.397	280.718	-8.27234	247.597	580.611	238.126	1002.41	241.534	387.027	244.193	499.648	238.231	905.986	244.193	844.316	238.231	753.3	238.231	123.894	238.231	58.6815
238.592	299.779	281.078	7.8346	281.925	4.02485	281.925	-2.02071	283.621	108.293	281.568	-7.69573	248.449	548.881	238.979	971.815	242.385	375.682	245.044	492.526	239.082	887.233	245.044	837.202	239.082	737.16	239.082	102.26	239.082	56.0348
239.444	274.675	281.925	9.0236	282.772	6.61451	282.772	0.375945	284.468	103.145	282.415	-4.59474	249.299	527.152	239.83	963.924	243.238	365.538	245.896	483.213	239.935	886.098	245.896	826.919	239.935	701.684	239.935	69.7286	239.935	62.0725
240.297	252.105	282.772	11.292	283.621	3.28576	283.621	0.061021	285.315	105.971	283.262	-8.45849	250.149	516.979	240.681	937.097	244.088	356.031	246.747	471.68	240.786	870.272	246.747	808.869	240.786	688.253	240.786	44.1919	240.786	102.672
241.147	230.614	283.621	9.9748	284.468	3.10159	284.468	-0.129056	286.162	104.178	284.109	-13.8387	251.001	514.082	241.534	935.559	244.939	348.391	247.597	463.391	241.639	857.866	247.597	795.845	241.639	675.757	241.639	44.3428	241.639	162.718
242	212.291	284.468	5.27433	285.315	4.78179	285.315	-0.740668	287.009	100.527	284.956	-7.54136	251.851	510.896	242.385	939.389	245.791	341.236	248.449	451.533	242.49	842.561	248.449	775.86	242.49	691.27	242.49	42.1181	242.49	180.583
242.851	196.034	285.315	4.34449	286.162	5.96304	286.162	-1.80398	287.855	96.8153	285.802	4.54479	252.701	511.953	243.238	941.893	246.642	327.33	249.299	442.625	243.34	831.54	249.299	759.183	243.34	737.847	243.34	56.1826	243.34	166.026
243.704	182.242	286.162	4.29465	287.009	5.95817	287.009	1.05629	288.702	96.4301	286.649	5.23037	253.553	507.337	244.088	927.93	247.494	309.16	250.149	436.503	244.193	815.811	250.149	747.722	244.193	754.525	244.193	69.2573	244.193	162.398
244.554	169.562	287.009	2.91626	287.855	7.88663	287.855	2.66248	289.548	94.5361	287.496	0.313277	254.403	509.926	244.939	907.649	248.344	289.045	251.001	428.183	245.044	802.421	251.001	728.983	245.044	761.395	245.044	90.1184	245.044	113.455
245.405	158.259	287.855	2.12881	288.702	3.89504	288.702	3.96566	290.395	92.1462	288.344	-4.06353	255.252	516.444	245.791	903.201	249.194	264.236	251.851	421.836	245.896	792.728	251.851	717.567	245.896	770.735	245.896	128.947	245.896	132.075
246.257	147.592	288.702	3.59691	289.548	2.66917	289.548	4.10875	291.241	84.7197	289.191	-5.97951	256.104	507.468	246.642	882.05	250.047	263.148	252.701	416.332	246.747	779.115	252.701	712.388	246.747	774.24	246.747	165.739	246.747	144.988
247.108	137.341	289.548	0.729065	290.395	1.65018	290.395	3.72789	292.087	75.2422	290.037	-1.1396	256.953	491.508	247.494	849.76	250.897	247.658	253.553	407.129	247.597	753.478	253.553	697.472	247.597	757.891	247.597	154.219	247.597	127.774
247.958	127.373	290.395	2.21425	291.241	0.820222	291.241	2.98231	292.933	68.7389	290.883	1.75708	257.803	467.29	248.344	823.461	251.746	251.666	254.403	395.18	248.449	737.862	254.403	677.601	248.449	723.729	248.449	133.858	248.449	126.037
248.81	117.692	291.241	1.75431	292.087	-0.270162	292.087	0.173243	293.781	68.4441	291.73	-0.140748	258.654	430.166	249.194	806.181	252.598	259.88	255.252	384.858	249.299	721.497	255.252	659.966	249.299	674.124	249.299	85.7067	249.299	134.194
249.66	108.112	292.087	2.16726	292.933	2.37873	292.933	2.03333	294.627	67.8768	292.576	-1.11236	259.503	379.43	250.047	788.441	253.448	260.277	256.104	374.174	250.149	707.199	256.104	648.958	250.149	633.988	250.149	53.7317	250.149	118.107
250.51	99.3752	292.933	2.81089	293.781	3.0091	293.781	2.98231	295.473	64.9231	293.422	-0.00454025	260.352	402.003	250.897	778.132	254.298	252.518	256.953	358.419	251.001	692.81	256.953	639.03	251.001	618.217	251.001	52.4873	251.001	71.6667
251.362	91.689	293.781	-0.00569582	294.627	6.1472	294.627	3.54272	296.319	60.7703	294.268	-2.82858	261.203	405.737	251.746	759.174	255.149	242.81	257.803	345.366	251.851	639.845	257.803	622.943	251.851	616.733	251.851	79.5888	251.851	38.6558
252.212	85.156	294.627	-0.32039	295.473	7.83227	295.473	1.26461	297.165	58.7669	295.114	-3.82289	262.052	417.364	252.598	750.647	255.999	233.459	258.654	336.963	252.701	590.101	258.654	605.886	252.701	609.624	252.701	84.962	252.701	12.3752
253.064	79.9655	295.473	-2.97322	296.319	8.72794	296.319	-0.284765	298.01	52.7894	295.96	6.30641	262.901	425.192	253.448	745.874	256.848	226.599	259.503	327.908	253.553	673.093	259.503	594.982	253.553	593.524	253.553	79.4851	253.553	2.91547
253.914	75.4332	296.319	-5.09064	297.165	7.31304	297.165	0.296688	298.856	47.3234	296.806	15.3551	263.75	432.997	254.298	743.834	257.7	217.566	260.352	321.812	254.403	670.324	260.352	588.649	254.403	578.549	254.403	80.5975	254.403	49.9765
254.764	69.6489	297.165	-4.62643	298.01	5.19718	298.01	0.0596182	299.702	41.9696	297.651	6.74682	264.601	413.676	255.149	739.517	258.549	208.901	261.203	316.229	255.252	656.98	261.203	581.947	255.252	563.245	255.252	75.4977	255.252	83.6491
255.613	63.5389	298.01	-5.37258	298.856	1.95928	298.856	-1.78434	300.547	40.6184	298.497	-2.1657	265.45	388.586	255.999	718.312	259.398	192.752	262.052	313.613	256.104	642.019	262.052	578.958	256.104	561.423	256.104	60.8016	256.104	123.153
256.465	58.0773	298.856	-6.60003	299.702	0.447025	299.702	-0.709106	301.392	39.5776	299.342	-10.656	266.298	369.198	256.848	690.565	260.25	188.229	262.901	307.627	256.953	621.54	262.901	573.772	256.953	556.216	256.953	37.8101	256.953	126.306
257.314	54.9561	299.702	-6.72676	300.547	-2.79168	300.547	-0.410313	302.238	38.5464	300.188	-14.3563	267.147	344.213	257.7	660.747	261.099	184.556	263.75	297.297	257.803	603.268	263.75	562.442	257.803	565.376	257.803	-4.92069	257.803	109.361
258.163	51.425	300.547	-2.68273	301.392	-4.11896	301.392	1.55148	303.083	36.2006	301.033	-7.18268	267.997	330.311	258.549	639.637	261.948	177.793	264.601	292.19	258.654	584.807	264.601	550.966	258.654	533.056	258.654	-41.7127	258.654	84.9207
259.015	48.7611	301.392	-3.80196	302.238	-4.69579	302.238	1.7668	303.928	30.4269	301.879	-4.07715	268.846	325.715	259.398	624.662	262.797	174.982	265.45	286.037	259.503	573.119	265.45	542.656	259.503	483.8	259.503	-39.2807	259.503	71.3979
259.864	45.9201	302.238	-2.20571	303.083	-2.92311	303.083	4.20904	304.773	24.9093	302.724	-6.10664	269.694	324.48	260.25	607.572	263.647	179.725	266.298	279.698	260.352	568.148	266.298	528.077	260.352	430.143	260.352	-21.8414	260.352	58.2059
260.713	43.8883	303.083	0.662139	303.928	-0.298558	303.928	5.71423	305.618	23.8074	303.569	-15.455	270.542	333.047	261.099	614.552	264.496	178.735	267.147	269.513	261.203	564.652	267.147	517.499	261.203	391.56	261.203	-27.62	261.203	46.8129
261.562	42.7287	303.928	1.32285	304.773	2.09153	304.773	3.60234	306.463	21.3808	304.414	-16.3631	271.392	342.651	261.948	619.889	265.345	172.655	267.997	259.695	262.052	560.378	267.997	508.788	262.052	405.639	262.052	-0.0754128	262.052	51.6616
262.413	39.8337	304.773	1.69451	305.618	3.98672	305.618	0.112924	307.308	18.5779	305.259	-5.58451	272.24	361.478	262.797	638.621	266.193	160.671	268.846	253.57	262.901	553.925	268.846	502.374	262.901	449.589	262.901	36.7826	262.901	48.2809
263.262	38.2935	305.618	-0.125308	306.463	2.64645	306.463	-3.04333	308.15	17.1282	306.104	8.07257	273.088	335.975	263.647	631.692	267.044	161.078	269.694	246.703	263.75	548.523	269.694	500.706	263.75	469.661	263.75	53.364	263.75	50.7932
264.111	36.9183	306.463	-4.97957	307.308	1.40355	307.308	-2.94865	308.995	14.402	306.949	0.140748	273.936	317.753	264.496	611.569	267.892	156.089	270.542	249.883	264.601	536.287	270.542	498.973	264.601	463.07	264.601	67.8244	264.601	53.9671
264.961	35.6476	307.308	-7.02295	308.15	1.43519	308.15	-3.53571	309.84	10.4129	307.794	8.48573	274.784	296.204	265.345	589.94	268.741	149.818	271.392	248.379	265.45	524.944	271.392	496.13	265.45	442.041	265.45	58.7937	265.45	47.1954
265.81	34.5517	308.15	-5.66165	308.995	1.91142	308.995	-3.58551	310.684	9.50803	308.638	-0.136208	275.634	283.481	266.193	576.892	269.589	135.539	272.24	244.451	266.298	507.066	272.24	494.596	266.298	413.545	266.298	22.803	266.298	26.7458
266.659	32.3329	308.995	-3.1384	309.84	1.31511	309.84	-4.04071	311.529	9.83955	309.483	-1.20771	276.481	271.772	267.044	555.516	270.439	118.437	273.088	241.559	267.147	490.324	273.088	485.534	267.147	358.524	267.147	-7.44702	267.147	7.46442
267.507	29.1187	309.84	-1.85541	310.684	2.0899	310.684	-5.23097	312.373	8.01144	310.328	-5.76158	277.329	247.497	267.892	529.529	271.287	115.829	273.936	239.003	267.997	475.397	273.936	472.081	267.997	395.314	267.997	-42.514	267.997	-14.8358
268.355	27.87	310.684	0.0783175	311.529	-0.703395	311.529	-5.57325	313.217	3.34507	311.172	-8.74907	278.176	236.663	268.741	506.433	272.135	112.605	274.784	234.919	268.846	466	274.784	449.16	268.846	386.483	268.846	-68.4937	268.846	-10.7727
269.206	25.9795	311.529	0.484145	312.373	-4.76394	312.373	-6.96831	314.061	0.958547	312.016	-10.0249	279.024	246.463	269.589	500.555	272.983	114.548	275.634	228.201	269.694	449.46	275.634	438.504	269.694	368.381	269.694	-60.8582	269.694	-11.91
270.054	24.2924	312.373	-0.559614	313.217	-2.24973	313.217	-6.14278	314.906	-0.720099	312.861	-11.9499	279.871	244.065	270.439	491.82	273.831	114.423	276.481	221.863	270.542	445.027	276.481	427.078	270.542	346.486	270.542	-51.441	270.542	20.5944
270.902	21.2733	313.217	-0.699162	314.061	-1.03035	314.061	-2.99424	315.75	-0.522412	313.705	-18.3245	280.718	245.423	271.287	491.477	274.681	117.66	277.329	217.038	271.392	448.195	277.329	423.457	271.392	362.845	271.392	-14.9977	271.392	71.6047
271.75	19.4432	314.061	-0.139548	314.906	-0.16875	314.906	-1.41751	316.594	0.265622	314.549	-17.7887	281.568	248.504	272.135	505.427	275.529	123.903	278.176	214.307	272.24	443.586	278.176	419.531	272.24	369.098	272.24	30.2028	272.24	122.377
272.6	17.7332	314.906	-0.30615	315.75	-0.500571	315.75	-1.11732	317.437	1.2955	315.393	-14.8466	282.415	238.004	272.983	510.498	276.377	124.077	279.024	216.327	273.088	434.553	279.024	417.976	273.088	393.552	273.088	45.012	273.088	153.538
273.448	16.2984	315.75	-1.53075	316.594	-2.19132	316.594	-0.31773	318.279	0.294154	316.235	-21.8568	283.262	222.425	273.831	485.504	277.224	122.945	279.871	219.73	273.936	421.151	279.871	411.37	273.936	408.178	273.936	45.6625	273.936	193.475
274.296	15.7969	316.594	-2.84221	317.437	-4.29582	317.437	0.00561112	319.123	-0.809772	317.079	-17.6934	284.109	222.332	274.681	484.2	278.072	118.015	280.718	216.277	274.784	405.889	280.718	410.526	274.784	392.925	274.784	15.224	274.784	204.341
275.144	15.7283	317.437	-4.37154	318.279	-5.75535	318.279	-0.148695	319.967	1.13721	317.923	-7.53682	284.956	223.418	275.529	455.505	278.919	113.862	281.568	208.989	275.634	385.603	281.568	402.631	275.634	383.914	275.634	-20.8799	275.634	94.9077
275.992	15.8566	318.279	-3.97426	319.123	-6.09772	319.123	-0.221639	320.81	3.11477	318.767	4.23152	285.802	219.602	276.377	430.912	279.769	110.32	282.415	200.689	276.481	387.304	282.415	401.722	276.481	392.785	276.481	-43.4378	276.481	75.5023
276.839	14.7957	319.123	-3.43031	319.967	-8.26064	319.967	-1.04367	321.654	-0.13383	319.61	12.6083	286.649	203.585	277.224	420.12	280.616	105.209	283.262	190.538	277.329	383.331	283.262	398.066	277.329	404.574	277.329	-63.8841	277.329	75.1301
277.689	14.1588	319.967	-2.26409	320.81	-10.2313	320.81	-2.43172	322.497	-5.58009	320.454	16.808	287.496	193.364	278.072	413.443	281.463	97.49	284.109	182.551	278.176	381.697	284.109	387.367	278.176	380.419	278.176	-86.2252	278.176	55.6316
278.536	12.7885	320.81	-2.91911	321.654	-12.8599	321.654	-2.04806	323.34	-7.41906	321.298	13.9477	288.344	208.439	278.919	410.93	282.31	93.079	284.956	173.288	279.024	381.404	284.956	370.41	279.024	345.49	279.024	-94.0021	279.024	3.57713
279.384	11.6983	321.654	-5.25155	322.497	-10.1088	322.497	0.284765	324.182	-7.7859	322.141	4.64014	289.191	213.876	279.769	405.516	283.157	90.5383	285.802	182.703	279.871	376.778	285.802	356.936	279.871	318.408	279.871	-61.2258	279.871	-16.6657
280.231	11.383	322.497	-6.39783	323.34	-8.36367	323.34	1.88955	325.025	-3.36341	322.982	0.0136208	290.037	216.079	280.616	394.015	284.004	90.3197	286.649	182.771	280.718	365.196	286.649	349.428	280.718	320.927	280.718	-51.3279	280.718	16.3762
281.078	10.8196	323.34	-8.23188	324.182	-8.37746	324.182	1.7633	325.868	-2.14943	323.826	-2.0976	290.883	219.538	281.463	380.426	284.851	92.1228	287.496	182.701	281.568	349.857	287.496	349.024	281.568	354.9	281.568	-38.14	281.568	48.3223
281.925	10.5068	324.182	-5.13193	325.025	-8.49835	325.025	0.440473	326.711	-2.0387	324.669	-0.17253	291.73	213.166	282.31	375.815	285.7	93.6677	288.344	182.006	282.415	341.232	288.344	350.071	282.415	310.96	282.415	-20.8988	282.415	75.9779
282.772	10.8457	325.025	-0.469905	325.868	-8.76689	325.868	0.336667	327.554	-2.94901	325.512	1.15776	292.576	205.677	283.157	368.163	286.547	96.4916	289.191	179.215	283.262	332.406	289.191	348.665	283.262	305.325	283.262	-30.5799	283.262	54.0705
283.621	12.3859	325.868	-2.94189	326.711	-9.46217	326.711	3.88009	328.395	-2.91708	326.355	-5.6844	293.422	206.187	284.004	357.146	287.393	98.4636	290.037	178.176	284.109	336.695	290.037	355.828	284.109	335.802	284.109	-34.0112	284.109	-28.3483
284.468	11.343	326.711	-7.08845	327.554	-9.66256	327.554	-1.313	329.238	-0.906918	327.198	-6.88756	294.268	189.946	284.851	348.47	288.24	96.7995	290.883	174.337	284.956	339.171	290.883	353.968	284.956	320.589	284.956	-19.8053	284.956	0.547942
285.315	10.9012	327.554	-4.70902	328.395	-10.2264	328.395	-0.851488	330.08	0.812489	328.039	-7.24624	295.114	155.973	285.7	347.31	289.086	92.6121	291.73	166.762	285.802	338.608	291.73	345.176	285.802	294.492	285.802	-19.7016	285.802	-39.5656
286.162	11.86	328.395	-1.23457	329.238	-10.8381	329.238	0.379452	330.923	1.66438	328.882	-9.00332	295.96	148.654	286.547	355.454	289.933	88.0373	292.576	159.618	286.649	333.393	292.576	331.644	286.649	247.466	286.649	-49.4991	286.649	-39.8757
287.009	11.579	329.238	-0.185114	330.08	-6.83924	330.08	-0.430654	331.766	-0.395375	329.725	-10.488	296.806	161.14	287.393	366.462	290.779	79.3669	293.422	152.871	287.496	333.483	293.422	315.873	287.496	232.531	287.496	-68.1544	287.496	-22.569
287.855	11.1895	330.08	-2.00208	330.923	-6.27296	330.923	-1.12854	332.606	-0.675942	330.567	0.0454025	297.651	160.996	288.24	366.751	291.625	75.4179	294.268	152.465	288.344	331.26	294.268	298.405	288.344	220.513	288.344	-82.0303	288.344	24.3679
288.702	8.36967	330.923	-0.20505	331.766	-3.22815	331.766	-1.23655	333.448	-3.90756	331.41	9.19855	298.497	158.484	289.086	367.103	292.471	68.0788	295.114	164.334	289.191	323.996	295.114	283.72	289.191	225.412	289.191	-64.0821	289.191	45.8721
289.548	6.66699	331.766	-2.24131	332.606	-0.809675	332.606	1.83484	334.291	-6.42247	332.25	10.4698	299.342	156.634	289.933	369.183	293.318	60.536	295.96	165.261	290.037	315.668	295.96	281.171	290.037	247.416	290.037	-39.884	290.037	-52.7472
290.395	5.22726	332.606	-4.82436	333.448	-0.159014	333.448	5.54169	335.133	-5.70169	333.093	10.9874	300.188	174.982	290.779	359.415	294.164	53.8973	296.806	162.663	290.883	305.169	296.806	287.415	290.883	269.679	290.883	-34.0583	290.883	81.1161
291.241	3.52377	333.448	-6.53311	334.291	-1.59014	334.291	8.99463	335.973	-8.25601	333.935	9.43919	301.033	171.894	291.625	338.846	295.009	50.2265	297.651	151.365	291.73	291.607	297.651	290.968	291.73	274.747	291.73	-46.3789	291.73	95.404
292.087	3.79326	334.291	-7.03291	335.133	-1.19748	335.133	10.0685	336.815	-7.0461	334.778	1.64357	301.879	149.758	292.471	308.253	295.855	44.4769	298.497	145.6	292.576	278.804	298.497	291.678	292.576	263.715	292.576	-54.9477	292.576	86.0166
292.933	4.06275	335.133	-4.96248	335.973	-1.93495	335.973	9.10685	337.657	-2.9789	335.618	5.11687	302.724	135.975	293.318	280.303	296.701	54.3841	299.342	147.968	293.422	272.018	299.342	288.2	293.422	240.317	293.422	-79.3437	293.422	71.8321
293.781	3.97047	335.973	0.585246	336.815	-1.21289	336.815	9.36637	338.499	-0.100542	336.46	12.2496	303.569	112.881	294.164	276.274	297.549	57.7866	300.188	143.14	294.268	269.501	300.188	278.516	294.268	220.224	294.268	-97.0752	294.268	56.8826
294.627	4.53966	336.815	3.48015	337.657	1.41653	337.657	10.0362	339.339	-2.32742	337.302	19.9181	304.414	113.134	295.009	281.805	298.395	54.5977	301.033	137.499	295.114	269.244	301.033	267.157	295.114	197.075	295.114	-93.1631	295.114	102.631
295.473	3.62421	337.657	3.65244	338.499	1.73293	338.499	9.06196	340.181	-3.13243	338.144	28.3993	305.259	103.923	295.855	284.954	299.24	53.3534	301.879	135.641	295.96	271.729	301.879	260.107	295.96	203.517	295.96	-73.075	295.96	144.626
296.319	2.6908	338.499	3.60118	339.339	1.5723	339.339	6.02985	341.023	-3.27645	338.984	27.9316	306.104	95.1893	296.701	293.066	300.086	55.3254	302.724	134.356	296.806	269.225	302.724	254.651	296.806	222.136	296.806	-46.2941	296.806	146.89
297.165	2.99132	339.339	0.375924	340.181	0.638492	340.181	8.16629	341.864	0.203122	339.826	22.5378	306.949	79.4557	297.549	277.641	300.931	50.8623	303.569	135.235	297.651	266.623	303.569	246.615	297.651	217.227	297.651	-27.158	297.651	121.116
298.01	2.78227	340.181	-4.10953	341.023	-0.498948	341.023	8.32551	342.704	2.11139	340.667	24.7943	307.794	93.6402	298.395	282.013	301.776	48.9424	304.414	137.475	298.497	260.968	304.414	237.08	298.497	211.97	298.497	-14.0362	298.497	113.776
298.856	2.20246	341.023	-2.01347	341.864	0.905409	341.864	9.50524	343.545	2.6963	341.509	17.1758	308.638	94.618	299.24	271.342	302.622	51.0585	305.259	136.788	299.342	249.602	305.259	234.372	299.342	201.824	299.342	-0.961514	299.342	118.614
299.702	-0.0457314	341.864	2.92053	342.704	2.50285	342.704	9.94081	344.387	-0.0129074	342.349	11.169	309.483	55.6262	300.086	255.655	303.467	54.3021	306.104	130.427	300.188	239.585	306.104	228.65	300.188	189.388	300.188	28.7889	300.188	97.3786
300.547	-0.0359318	342.704	6.27822	343.545	1.87978	343.545	10.0011	345.226	-1.87769	343.19	5.81152	310.328	89.8367	300.931	239.354	304.312	53.6936	306.949	124.253	301.033	228.246	306.949	229.516	301.033	164.516	301.033	30.6082	301.033	111.635
301.392	-0.293988	343.545	11.0898	344.387	0.279898	344.387	10.0046	346.067	-1.74726	344.032	11.3325	311.172	73.398	301.776	227.439	305.157	48.8853	307.794	119.154	301.879	221.683	307.794	227.06	301.879	144.264	301.879	51.2619	301.879	64.2747
302.238	-0.095546	344.387	14.634	345.226	-1.35974	345.226	8.81297	346.909	-1.83693	344.871	17.3392	312.016	66.545	302.622	217.698	306.002	45.9174	308.638	109.157	302.724	218.604	308.638	219.467	302.724	127.148	302.724	29.1565	302.724	18.6404
303.083	0.461397	345.226	13.0748	346.067	-4.27716	346.067	7.88433	347.748	-2.26084	345.712	19.909	312.861	67.7339	303.467	218.921	306.845	42.0454	309.483	102.006	303.569	215.942	309.483	208.843	303.569	116.176	303.569	3.12963	303.569	4.89013
303.928	1.68798	346.067	7.45725	346.909	-3.89585	346.909	6.13857	348.589	-0.851212	346.553	20.7172	313.705	57.5382	304.312	217.369	307.689	36.8695	310.328	96.8425	304.414	212.798	310.328	208.892	304.414	145.269	304.414	-10.5861	304.414	-19.9327
304.773	2.6761	346.909	2.84079	347.748	-3.15757	347.748	5.27446	349.43	-8.51483	347.395	20.413	314.549	43.678	305.157	208.995	308.534	29.2671	311.172	98.5399	305.259	214.42	311.172	208.917	305.259	170.59	305.259	-27.6954	305.259	-22.569
305.618	2.80513	347.748	1.00531	348.589	-1.46602	348.589	4.07999	350.269	0.295512	348.234	15.1644	315.393	39.4062	306.002	204.154	309.379	22.9959	312.016	104.68	306.104	216.516	312.016	210.706	306.104	205.169	306.104	-37.6876	306.104	-12.9232
306.463	2.45316	348.589	-0.0469905	349.43	0.0957332	349.43	3.20535	351.109	-0.0448364	349.075	9.23487	316.235	39.7253	306.845	201.452	310.223	19.6207	312.861	112.044	306.949	211.112	312.861	212.371	306.949	235.856	306.949	-44.1259	306.949	-16.6864
307.308	2.02117	349.43	1.74434	350.269	-0.948407	350.269	1.19868	351.95	-6.4741	349.916	8.21786	317.079	40.4561	307.689	194.995	311.068	19.8243	313.705	114.078	307.794	196.666	313.705	217.071	307.794	222.863	307.794	-46.4166	307.794	-0.909791
308.15	-0.285005	350.269	2.74396	351.109	-0.803185	351.109	0.339473	352.789	-4.61543	350.754	-0.204311	317.923	56.128	308.534	184.456	311.912	23.5622	314.549	106.729	308.638	186.335	314.549	210.617	308.638	195.501	308.638	-66.6084	308.638	5.14859
308.995	-3.67975	351.109	2.14305	351.95	0.0292067	351.95	-0.0785557	353.629	-2.86409	351.595	3.29168	318.767	73.3285	309.379	158.428	312.757	29.5776	315.393	99.9026	309.483	174.694	315.393	197.317	309.483	158.86	309.483	-111.29	309.483	16.3452
309.84	-1.46096	351.95	0.0569582	352.789	-0.120072	352.789	-2.84835	354.47	1.68884	352.436	12.2723	319.61	57.8753	310.223	132.653	313.601	32.1456	316.235	99.6985	310.328	167.907	316.235	188.063	310.328	134.207	310.328	-129.361	310.328	20.2118
310.684	-0.0253156	352.789	-0.291911	353.629	-0.835637	353.629	-1.50238	355.308	1.92117	353.274	18.1883	320.454	39.2801	311.068	117.593	314.445	28.5593	317.079	95.9417	311.172	164.615	317.079	178.404	311.172	101.201	311.172	-119.69	311.172	14.9495
311.529	0.185376	353.629	4.73892	354.47	-0.438912	354.47	-0.540772	356.149	1.39536	354.115	13.9704	321.298	20.3812	311.912	123.616	315.289	24.3669	317.923	95.042	312.016	164.877	317.923	177.318	312.016	132.744	312.016	-110.14	312.016	-0.868437
312.373	-0.483446	354.47	9.10192	355.308	-0.0973558	355.308	-0.0519029	356.987	-0.0339669	354.953	10.5515	322.141	15.1469	312.757	122.592	316.133	20.8228	318.767	95.6465	312.861	167.956	318.767	176.182	312.861	184.27	312.861	-72.8488	312.861	26.7561
313.217	-1.62673	355.308	10.1813	356.149	0.128996	356.149	-0.302299	357.827	-2.33285	355.794	3.59588	322.982	20.0158	313.601	123.981	316.977	17.7753	319.61	96.6965	313.705	167.166	319.61	176.242	313.705	192.056	313.705	-47.1896	313.705	22.1555
314.061	-3.71649	356.149	12.7857	356.987	0.579267	356.987	0.0406806	358.667	-5.2642	356.634	-4.79451	323.826	30.1858	314.445	131.475	317.821	17.1495	320.454	92.2178	314.549	164.991	320.454	172.643	314.549	213.175	314.549	-50.5832	314.549	9.76991
314.906	-4.19177	356.987	10.9032	357.827	1.99255	357.827	-0.862009	359.505	-3.67183	357.472	-9.26666	324.669	35.6156	315.289	137.304	318.663	19.7275	321.298	90.256	315.393	158.685	321.298	173.541	315.393	201.814	315.393	-51.7709	315.393	-15.3424
315.75	-3.57767	357.827	11.2136	358.667	2.88984	358.667	-1.70508	360.345	-1.7262	358.312	-1.63903	325.512	17.921	316.133	125.479	319.506	20.6415	322.141	91.4607	316.235	151.065	322.141	164.876	316.235	164.516	316.235	-42.4197	316.235	-15.9213
316.594	-2.93906	358.667	8.73454	359.505	1.59826	359.505	-2.26409	361.183	-2.2785	359.15	0.844487	326.355	53.4491	316.977	103.354	320.35	15.1179	322.982	86.6385	317.079	145.421	322.982	157.766	317.079	137.274	317.079	-34.6051	317.079	-48.8392
317.437	-1.85457	359.505	3.58837	360.345	-1.26562	360.345	-2.48503	362.023	-5.22955	359.99	6.56067	327.198	66.4087	317.821	115.824	321.193	1.39332	323.826	84.9576	317.923	145.991	323.826	153.57	317.923	145.568	317.923	-13.7063	317.923	-23.9544
318.279	-1.51812	360.345	1.28441	361.183	-6.48308	361.183	-2.23884	362.86	-9.73561	360.83	9.97948	328.039	60.0318	318.663	132.03	322.037	-0.941296	324.669	83.7572	318.767	144.202	324.669	151.572	318.767	137.593	318.767	0.0754128	318.767	55.4559
319.123	-1.92235	361.183	0.996769	362.023	-7.77305	362.023	-1.80748	363.7	-10.3382	361.668	9.45735	328.882	54.1027	319.506	127.654	322.88	-6.4028	325.512	80.5786	319.61	142.784	325.512	149.3	319.61	108.927	319.61	3.56326	319.61	104.409
319.967	-2.27269	362.023	1.87677	362.86	-7.79576	362.86	-2.38613	364.54	-7.81104	362.508	-2.30645	329.725	36.9126	320.35	118.797	323.724	-5.47144	326.355	81.3368	320.454	136.783	326.355	153.144	320.454	135.233	320.454	6.40066	320.454	103.023
320.81	-2.53728	362.86	0.935538	363.7	-7.22542	363.7	-2.00457	365.377	-5.80903	363.346	-22.3653	330.567	30.1085	321.193	118.409	324.565	-1.24678	327.198	80.8617	321.298	126.021	327.198	163.655	321.298	124.281	321.298	22.1902	321.298	91.3719
321.654	-4.2963	363.7	-0.568158	364.54	-6.07987	364.54	-1.48625	366.217	-3.35593	364.185	-21.5571	331.41	22.0101	322.037	119.037	325.408	0.0596071	328.039	81.7175	322.141	112.622	328.039	167.013	322.141	100.673	322.141	-33.4079	322.141	48.8082
322.497	-6.25867	364.54	-2.07897	365.377	-5.73588	365.377	-0.123445	367.054	-3.2092	365.023	-13.3256	332.25	25.2629	322.88	122.908	326.251	0.583653	328.882	80.8793	322.982	113.008	328.882	161.685	322.982	75.4625	322.982	-87.1207	322.982	9.29434
323.34	-9.56277	365.377	-1.86823	366.217	-6.98203	366.217	-0.0336667	367.893	-4.82467	365.862	-2.84674	333.093	27.6149	323.724	120.525	327.094	1.24182	329.725	79.601	323.826	112.722	329.725	155.65	323.826	58.0281	323.826	-139.891	323.826	-11.3207
324.182	-10.7052	366.217	2.3538	367.054	-4.64955	367.054	-1.37753	368.73	-6.28117	366.702	10.8648	333.935	30.0133	324.565	104.216	327.937	-0.0521563	330.567	75.5732	324.669	106.557	330.567	156.186	324.669	88.7149	324.669	-129.003	324.669	-15.5698
325.025	-5.38896	367.054	2.92196	367.893	-0.653095	367.893	-2.0186	369.569	-7.94147	367.539	14.4289	334.778	-0.223884	325.408	83.1415	328.78	-4.10048	331.41	71.7681	325.512	105.723	331.41	154.202	325.512	103.999	325.512	-119.935	325.512	-45.7377
325.868	-4.17871	367.893	-1.50654	368.73	1.57473	368.73	-2.39455	370.406	-5.71596	368.378	14.942	335.618	-0.00257338	326.251	80.3488	329.621	-8.29533	332.25	66.8285	326.355	106.991	332.25	145.14	326.355	102.565	326.355	-104.39	326.355	-44.2282
326.711	-3.85451	368.73	0.0598061	369.569	0.808053	369.569	-0.0806599	371.245	-0.853929	369.215	14.5742	336.46	7.12054	327.094	84.6214	330.463	-11.3105	333.093	64.7284	327.198	104.484	333.093	143.053	327.198	103.989	327.198	-58.6618	327.198	-56.5828
327.554	-3.94842	369.569	1.68169	370.406	-4.62115	370.406	0.695078	372.082	2.20106	370.054	13.5254	337.302	15.6642	327.937	77.0733	331.306	-6.46986	333.935	66.451	328.039	102.347	333.935	138.048	328.039	88.8145	328.039	-17.854	328.039	-26.8181
328.395	-3.43149	370.406	2.42072	371.245	-8.30688	371.245	-0.0315626	372.921	1.7031	370.891	6.50164	338.144	15.8597	328.78	69.435	332.148	-0.149018	334.778	67.6964	328.882	94.1665	334.778	128.904	328.882	94.3604	328.882	-10.5484	328.882	-49.1494
329.238	-2.14366	371.245	4.92119	372.082	-8.2225	372.082	-0.979842	373.758	0.91439	371.73	9.37562	338.984	18.7985	329.621	64.8556	332.989	4.35381	335.618	67.2421	329.725	95.5247	335.618	118.684	329.725	82.1534	329.725	-1.47055	329.725	-86.5749
330.08	-1.50015	372.082	2.57736	372.921	-7.41607	372.921	-4.98899	374.596	0.0407603	372.567	6.86486	339.826	32.5816	330.463	65.0677	333.831	0.255814	336.46	63.7014	330.567	88.0476	336.46	115.482	330.567	85.6383	330.567	6.57034	330.567	-73.4759
330.923	-2.17143	372.921	2.83225	373.758	-7.35279	373.758	-6.09859	375.433	-0.0869554	373.406	1.38932	340.667	39.6429	331.306	59.2701	334.674	1.39083	337.302	68.6092	331.41	89.3003	337.302	111.439	331.41	99.6375	331.41	-2.02672	331.41	-8.99452
331.766	-2.27595	373.758	-0.700586	374.596	-5.25234	374.596	-9.6371	376.272	-1.39264	374.242	-2.02949	341.509	38.2687	332.148	62.1486	335.516	-0.144051	338.144	71.1482	332.25	91.7104	338.144	109.646	332.25	118.944	332.25	-9.91679	332.25	26.2082
332.606	-2.0522	374.596	-1.44674	375.433	-3.78795	375.433	-10.2901	377.108	-0.845098	375.081	-3.68669	342.349	30.2398	332.989	58.1873	336.358	7.05848	338.984	70.3253	333.093	87.1829	338.984	115.035	333.093	114.483	333.093	-11.7738	333.093	78.0766
333.448	-2.46786	375.433	-0.0811654	376.272	-1.54552	376.272	-9.85033	377.946	-0.501352	375.918	4.92163	343.19	20.6514	333.831	56.7481	337.198	5.22308	339.826	67.9762	333.935	74.072	339.826	124.03	333.935	104.148	333.935	-33.455	333.935	103.664
334.291	-2.57893	376.272	-0.0897092	377.108	-1.36379	377.108	-8.42861	378.783	0.420511	376.756	11.0328	344.032	14.9076	334.674	61.1831	338.04	-2.59291	340.667	65.5821	334.778	67.1275	340.667	128.673	334.778	80.3911	334.778	-80.1638	334.778	93.1708
335.133	-1.68635	377.108	0.179418	377.946	-0.101412	377.946	-7.11841	379.619	0.797544	377.592	11.8955	344.871	17.3266	335.516	74.1046	338.882	-2.09122	341.509	62.7129	335.618	62.7124	341.509	124.474	335.618	54.3342	335.618	-75.8936	335.618	63.2511
335.973	0.0947294	377.946	2.77102	378.783	-1.69399	378.783	-5.11734	380.457	-0.108694	378.431	12.0317	345.712	8.46899	336.358	75.6205	339.724	4.26936	342.349	60.288	336.46	61.3746	342.349	119.429	336.46	33.3054	336.46	-43.6452	336.46	21.1423
336.815	0.351152	378.783	0.253464	379.619	-3.36121	379.619	-2.48503	381.293	0.0319289	379.267	10.8103	346.553	14.1356	337.198	82.4873	340.563	9.8327	343.19	60.5975	337.302	60.6002	343.19	116.128	337.302	50.3315	337.302	-7.91835	337.302	-41.7056
337.657	0.292354	379.619	1.60195	380.457	-4.34612	380.457	-2.4212	382.131	2.39671	380.103	15.0963	347.395	18.3147	338.04	80.042	341.405	9.69113	344.032	64.7712	338.144	57.1194	344.032	113.707	338.144	63.7533	338.144	28.2987	338.144	-84.3107
338.499	0.871347	380.457	1.73011	381.293	-4.04432	381.293	-1.00299	382.967	0.630427	380.941	23.1326	348.234	37.3114	338.882	75.7063	342.247	12.361	344.871	68.5708	338.984	61.7303	344.871	112.568	338.984	77.2846	338.984	64.6382	338.984	-71.3152
339.339	2.10283	381.293	-0.281943	382.131	-3.38555	382.131	0.00631251	383.805	-0.456516	381.777	31.3323	349.075	45.2735	339.724	74.8535	343.086	12.9323	345.712	67.636	339.826	71.5495	345.712	108.844	339.826	81.3967	339.826	61.7725	339.826	-34.7581
340.181	3.04931	382.131	-0.411523	382.967	-3.3101	382.967	-0.199896	384.64	-4.50945	382.615	34.3379	349.916	36.313	340.563	66.6062	343.928	4.49537	346.553	61.4083	340.667	75.8642	346.553	109.977	340.667	62.0507	340.667	48.5753	340.667	-9.71822
341.023	3.79571	382.967	0.321814	383.805	-4.97894	383.805	-0.497286	385.476	-1.89264	383.451	34.5195	350.754	25.2268	341.405	49.9715	344.769	-2.52834	347.395	58.3635	341.509	72.7512	347.395	112.039	341.509	68.6918	341.509	33.3325	341.509	6.25481
341.864	4.11828	383.805	0.941234	384.64	-0.752073	384.64	1.85518	386.313	1.24455	384.289	29.4662	351.595	0.285645	342.247	43.0145	345.61	-0.658162	348.234	59.5496	342.349	57.4752	348.234	110.91	342.349	72.7642	342.349	-0.0188532	342.349	50.1729
342.704	3.95495	384.64	-0.945506	385.476	0.520042	385.476	2.68422	387.149	2.05908	385.124	19.7274	352.436	-4.54716	343.086	47.2961	346.45	0.223527	349.075	53.5918	343.19	55.6148	349.075	106.501	343.19	62.439	343.19	-30.9475	343.19	86.8437
343.545	3.04849	385.476	2.77814	386.313	0.347236	386.313	5.01705	387.986	5.07194	385.96	16.1588	353.274	-3.66192	343.928	50.919	347.291	3.38767	349.916	49.3467	344.032	54.0115	349.916	103.949	344.032	66.0832	344.032	-30.4762	344.032	95.9002
344.387	2.0571	386.313	2.06473	387.149	0.470553	387.149	5.56694	388.822	1.06996	386.797	10.5561	354.115	-8.16019	344.769	49.4482	348.132	4.69406	350.754	42.3466	344.871	57.2113	350.754	103.293	344.871	77.7625	344.871	-4.31739	344.871	96.2207
345.226	1.30416	387.149	0.931267	387.986	1.85706	387.986	3.48591	389.657	-1.10461	387.633	12.4857	354.953	-5.97282	345.61	47.3187	348.971	5.27027	351.595	41.866	345.712	61.0614	351.595	101.34	345.712	62.5585	345.712	-3.78007	345.712	104.76
346.067	0.137194	387.986	-0.64078	388.822	1.4652	388.822	1.26461	390.494	-2.18272	388.47	14.3971	355.794	4.68098	346.45	39.0262	349.812	6.78031	352.436	43.6665	346.553	59.9568	352.436	98.4756	346.553	36.5912	346.553	25.2822	346.553	105.05
346.909	0.438532	388.822	-1.27302	389.657	0.0105469	389.657	-0.460814	391.329	-0.324724	389.306	20.976	356.634	26.0503	347.291	16.4767	350.653	3.84466	353.274	45.0874	347.395	56.6241	353.274	94.7165	347.395	20.5309	347.395	24.5375	347.395	111.356
347.748	1.00201	389.657	-3.30642	390.494	-0.858353	390.494	0.131861	392.164	2.44902	390.141	10.1929	357.472	30.5898	348.132	27.192	351.491	-3.43238	354.115	45.1335	348.234	49.0687	354.115	91.4152	348.234	11.062	348.234	22.539	348.234	97.7198
348.589	1.29681	390.494	-7.31771	391.329	-0.705829	391.329	-1.04858	393.001	2.88855	390.978	7.13728	358.312	31.1971	348.971	28.4282	352.332	-4.36374	354.953	43.345	349.075	55.9484	354.953	100.098	349.075	6.81044	349.075	28.261	349.075	61.0077
349.43	2.00238	391.329	-11.9812	392.164	0.766677	392.164	-1.65177	393.836	3.85253	391.813	3.50508	359.15	22.1285	349.812	13.499	353.171	3.38271	355.794	45.3145	349.916	50.5631	355.794	100.25	349.916	7.72646	349.916	36.3961	349.916	19.4054
350.269	3.29348	392.164	-13.3966	393.001	1.85382	393.001	-0.136771	394.671	2.22755	392.648	0.558451	359.99	27.3782	350.653	16.188	354.011	-1.95213	356.634	41.3986	350.754	43.5983	356.634	99.6718	350.754	3.44505	350.754	51.6766	350.754	20.9148
351.109	3.15628	393.001	-8.45972	393.836	2.22377	393.836	1.68474	395.508	-0.0815207	393.485	0.653796	360.83	21.0837	351.491	24.0203	354.852	-6.73064	357.472	35.6547	351.595	34.9161	357.472	96.4558	351.595	-27.2716	351.595	62.7341	351.595	-20.553
351.95	4.39675	393.836	-0.363109	394.671	1.71995	394.671	3.89342	396.342	-3.26083	394.32	2.49714	361.668	-1.86055	352.332	1.87687	355.69	4.10048	358.312	35.4155	352.436	29.3827	358.312	93.5238	352.436	-43.3419	352.436	48.1134	352.436	-49.9558
352.789	5.15867	394.671	3.90733	395.508	-0.755318	395.508	6.50119	397.177	-3.50335	395.154	2.76501	362.508	-20.78	353.171	6.36149	356.53	1.88011	359.15	39.4083	353.274	24.5165	359.15	90.0664	353.274	46.6774	353.274	38.2626	353.274	-71.3565
353.629	5.21093	395.508	-1.07936	396.342	-2.34871	396.342	7.65638	398.013	-5.03526	395.991	-1.03518	363.346	-41.1998	354.011	2.61678	357.371	8.33258	359.99	37.6988	354.115	26.9913	359.99	91.7667	354.115	87.102	354.115	30.825	354.115	-53.6156
354.47	4.50618	396.342	0.764664	397.177	-2.67809	397.177	5.75701	398.848	-5.30224	396.826	3.76387	364.185	-53.8351	354.852	0.0766988	358.209	7.00384	360.83	34.8373	354.953	34.0769	360.83	88.7778	354.953	109.485	354.953	67.7207	354.953	-0.0516926
355.308	3.92147	397.177	-1.75004	398.013	-1.80189	398.013	6.03827	399.682	-4.31652	397.66	3.10099	365.023	-30.2578	355.69	5.73436	359.049	5.7347	361.668	34.0342	355.794	40.6622	361.668	86.1723	355.794	108.947	355.794	126.071	355.794	72.4317
356.149	3.58665	398.013	-0.989649	398.848	-1.40517	398.848	6.16452	400.519	-2.06723	398.497	-0.054483	365.862	-11.9045	356.53	7.77365	359.887	4.20975	362.508	33.4384	356.634	47.1352	362.508	85.0293	356.634	112.522	356.634	177.362	356.634	175.29
356.987	3.83654	398.848	0.758968	399.682	-0.733413	399.682	3.24253	401.353	-0.561134	399.331	0.00908051	366.702	-7.25179	357.371	15.7458	360.727	6.42764	363.346	21.7444	357.472	51.7205	363.346	78.9026	357.472	124.739	357.472	162.515	357.472	247.711
357.827	3.42006	399.682	0.932691	400.519	1.04171	400.519	-0.558307	402.187	-1.54753	400.165	5.74796	367.539	-13.6955	358.209	16.1564	361.567	2.44886	364.185	10.7131	358.312	50.3759	364.185	71.6186	358.312	93.0063	358.312	127.778	358.312	259.228
358.667	2.23022	400.519	0.0740457	401.353	1.26157	401.353	3.21588	403.021	-0.447684	401.002	6.70595	368.378	-15.9035	359.049	17.8799	362.404	-2.33958	365.023	19.0716	359.15	44.674	365.023	66.184	359.15	87.1418	359.15	107.878	359.15	178.071
359.505	1.17432	401.353	-8.3102	402.187	2.35114	402.187	3.74262	403.857	0.414397	401.836	8.79447	369.215	-18.0651	359.887	22.0216	363.244	-4.021	365.862	19.2976	359.99	39.721	365.862	63.4188	359.99	71.6191	359.99	77.6375	359.99	111.522
360.345	0.356868	402.187	-3.81335	403.021	2.32843	403.021	2.20938	404.691	0.830152	402.67	8.72637	370.054	-13.747	360.727	14.2524	364.082	-2.64507	366.702	23.5515	360.83	30.232	366.702	60.1211	360.83	60.4576	360.83	36.9429	360.83	33.2694
361.183	-0.146994	403.021	-2.21567	403.857	1.06118	403.857	1.7156	405.525	0.00747273	403.504	7.81832	370.891	-11.0089	361.567	3.91164	364.921	-4.64439	367.539	26.3998	361.668	23.5889	367.539	58.2185	361.668	32.9868	361.668	42.8251	361.668	-47.9811
362.023	-0.105346	403.857	0.316118	404.691	-0.554117	404.691	1.8159	406.358	-1.06928	404.34	14.9601	371.73	-5.02324	362.404	6.95252	365.759	-2.29736	368.378	28.976	362.508	19.2554	368.378	61.644	362.508	10.6139	362.508	46.822	362.508	-32.9903
362.86	0.799483	404.691	-2.18435	405.525	-4.44997	405.525	5.36634	407.194	-2.69562	405.174	25.5616	372.567	8.41495	363.244	-0.369959	366.598	1.45541	369.215	32.0449	363.346	20.8843	369.215	63.8945	363.346	1.90175	363.346	56.9273	363.346	-19.7879
363.7	2.56096	405.525	-6.08171	406.358	-6.4912	406.358	6.28446	408.028	-4.9354	406.007	27.9634	373.406	1.25581	364.082	4.66058	367.435	11.2037	370.054	31.0596	364.185	15.6487	370.054	60.2986	364.185	-35.8643	364.185	62.8472	364.185	5.31401
364.54	4.98799	406.358	-9.48924	407.194	-8.94943	407.194	5.74509	408.861	-2.00745	406.843	23.9635	374.242	-2.70205	364.921	2.47692	368.274	13.198	370.891	29.4127	365.023	13.7373	370.891	51.6054	365.023	-77.4737	365.023	52.2422	365.023	25.4741
365.377	6.60247	407.194	-10.093	408.028	-5.95168	408.028	2.58953	409.695	2.7092	407.677	24.1859	375.081	0.319099	365.759	0.0947456	369.112	15.8406	371.73	28.6732	365.862	15.9704	371.73	45.5816	365.862	-35.1873	365.862	47.5761	365.862	34.2722
366.217	6.54449	408.028	-9.3326	408.861	-4.57978	408.861	0.00140278	410.53	6.87899	408.51	16.9306	375.918	12.5246	366.598	4.83654	369.951	15.0881	372.567	29.4424	366.702	18.0997	372.567	51.1972	366.702	57.819	366.702	54.1464	366.702	77.4666
367.054	5.45919	408.861	-8.64483	409.695	-3.97617	409.695	0.279855	411.363	11.8205	409.344	10.4244	376.756	10.4222	367.435	4.99896	370.79	8.26056	373.406	30.5253	367.539	19.892	373.406	53.4406	367.539	116.415	367.539	42.7874	367.539	80.5888
367.893	4.21872	409.695	-9.26283	410.53	-2.23594	410.53	-1.39927	412.196	16.3979	410.177	8.78539	377.592	6.31507	368.274	5.1704	371.627	5.45157	374.242	30.4057	368.378	15.3117	374.242	50.5831	368.378	135.313	368.378	50.4606	368.378	2.7914
368.73	1.89377	410.53	-8.26748	411.363	1.68993	411.363	4.06105	413.03	16.315	411.013	18.6831	378.431	7.8308	369.112	0.487263	372.465	3.70558	375.081	24.2252	369.215	11.6132	375.081	46.3377	369.215	106.269	369.215	29.6561	369.215	56.6758
369.569	-0.591242	411.363	-3.03018	412.196	2.35844	412.196	4.5401	413.863	11.6228	411.846	18.6377	379.267	8.97852	369.951	0.388006	373.302	3.94152	375.918	16.5513	370.054	4.6228	375.918	42.6993	370.054	41.9081	370.054	10.9349	370.054	42.8532
370.406	-1.43564	412.196	-0.696314	413.03	5.45841	413.03	4.44331	414.698	7.26485	412.679	25.1757	380.103	5.15448	370.79	11.5951	374.139	2.81892	376.756	16.8476	370.891	0.524235	376.756	46.682	370.891	17.1755	370.891	4.4305	370.891	-0.909791
371.245	-1.27476	413.03	1.61192	413.863	2.46959	413.863	4.04281	415.53	2.92387	413.512	28.6218	380.941	-3.50494	371.627	19.3822	374.977	-0.1366	377.592	20.3784	371.73	-2.47309	377.592	44.6729	371.73	27.7396	371.73	21.5021	371.73	-49.8214
372.082	-0.497329	413.863	-0.444274	414.698	0.264483	414.698	3.683	416.363	1.55569	414.347	27.9362	381.777	-6.97129	372.465	14.478	375.814	-0.961165	378.431	19.6114	372.567	-6.42868	378.431	41.4498	372.567	25.6785	372.567	36.9994	372.567	-52.5301
372.921	-0.0261322	414.698	-0.185114	415.53	-2.64564	415.53	2.26128	417.196	4.73703	415.18	25.5979	382.615	-6.52352	373.302	17.7851	376.652	-0.486792	379.267	19.6827	373.406	-11.9008	379.267	42.5644	373.406	40.5042	373.406	47.0199	373.406	-23.6959
373.758	0.129028	415.53	2.38085	416.363	-3.4829	416.363	-0.874634	418.029	7.85044	416.013	22.0429	383.451	-8.30687	374.139	21.6426	377.489	-1.04561	380.103	18.2103	374.242	-14.4913	380.103	44.3889	374.242	25.6885	374.242	85.0845	374.242	-0.165416
374.596	0.502229	416.363	5.43666	417.196	-5.71478	417.196	-0.940565	418.861	8.09908	416.846	27.7818	384.289	-14.9462	374.977	16.012	378.327	0.0248363	380.941	14.4326	375.081	-10.146	380.941	43.9807	375.081	48.4796	375.081	100.591	375.081	27.6659
375.433	1.17595	417.196	0.458514	418.029	-5.38215	418.029	-0.813613	419.696	4.94559	417.678	29.7841	385.124	-15.4557	375.814	5.49073	379.163	3.42244	381.777	10.847	375.918	-6.4457	381.777	45.0492	375.918	37.3977	375.918	74.7436	375.918	59.705
376.272	1.36133	418.029	0.12246	418.861	-4.22849	418.861	0.772231	420.528	2.60051	418.511	29.4889	385.96	-18.2015	376.652	-6.16749	380.002	5.9483	382.615	8.07322	376.756	-5.52999	382.615	46.9056	376.756	-6.57148	376.756	42.4857	376.756	47.2161
377.108	0.935044	418.861	1.32713	419.696	-2.43714	419.696	1.9162	421.361	1.52036	419.346	30.0338	386.797	-25.2166	377.489	18.8769	380.838	8.31271	383.451	10.1755	377.592	-4.50535	383.451	47.0441	377.592	14.4772	377.592	10.4635	377.592	46.4717
377.946	0.251523	419.696	-1.09787	420.528	0.0705829	420.528	0.663515	422.193	-1.12838	420.178	24.7398	387.633	-30.1574	378.327	35.7056	381.676	14.333	384.289	10.7998	378.431	-2.02886	384.289	48.1125	378.431	70.7529	378.431	9.37004	378.431	19.819
378.783	-0.643506	420.528	-4.42138	421.361	0.160637	421.361	-0.207612	423.025	-1.98775	421.01	15.8001	388.47	-36.1817	379.163	33.5129	382.512	24.5631	385.124	12.7704	379.267	0.343816	385.124	50.324	379.267	57.7991	379.267	11.9812	379.267	-23.8923
379.619	-1.49525	421.361	-7.9357	422.193	1.44817	422.193	0.163424	423.857	-1.1114	421.843	20.1769	389.306	-12.3008	380.002	27.4988	383.347	24.5581	385.96	12.7001	380.103	0.384666	385.96	50.1891	380.103	50.3714	380.103	7.99376	380.103	-1.74721
380.457	-1.90684	422.193	-7.09557	423.025	0.292067	423.025	1.49887	424.689	-1.79278	422.675	16.4176	390.141	-16.6601	380.838	16.2466	384.185	20.4279	386.797	13.4748	380.941	0.112336	386.797	47.9386	380.941	40.9423	380.941	-18.8815	380.941	-22.4656
381.293	-1.78353	423.025	-5.28999	423.857	0.270974	423.857	2.09225	425.521	0.253393	423.507	15.4005	390.978	-16.1969	381.676	3.79434	385.021	12.6094	387.633	10.8327	381.777	-2.50033	387.633	46.359	381.777	60.6069	381.777	11.2836	381.777	-28.8652
382.131	-0.815816	423.857	-3.83329	424.689	0.307482	424.689	1.2127	426.355	1.38993	424.339	14.6696	391.813	-9.9281	382.512	0.21205	385.858	7.04109	388.47	6.83887	382.615	-7.71884	388.47	40.8783	382.615	45.4826	382.615	34.7842	382.615	-17.5445
382.967	0.280105	424.689	-1.67742	425.521	-1.47575	425.521	1.66791	427.187	1.8247	425.173	10.7422	392.648	-1.61608	383.347	9.98889	386.694	0.990969	389.306	2.65852	383.451	-10.98	389.306	28.898	383.451	57.0723	383.451	74.9698	383.451	-1.7989
383.805	1.6251	425.521	-1.53787	426.355	1.08227	426.355	3.84923	428.019	-0.0237769	426.005	11.0056	393.485	1.3047	384.185	16.7655	387.529	-5.76948	390.141	1.16523	384.289	-5.31894	390.141	28.0923	384.289	53.4082	384.289	69.8323	384.289	1.17859
384.64	3.03624	426.355	0.553918	427.187	1.0701	427.187	4.66355	428.851	0.235731	426.837	10.1929	394.32	-12.7562	385.021	24.7512	388.367	-8.2233	390.978	0.932623	385.124	-5.36319	390.978	20.7622	385.124	38.4631	385.124	59.3876	385.124	-13.6055
385.476	2.91456	427.187	1.57347	428.019	1.75484	428.019	4.85923	429.682	-0.0278529	427.669	18.1837	395.154	12.6507	385.858	29.1591	389.202	-5.91849	391.813	1.87951	385.96	-8.87624	391.813	23.1866	385.96	29.3028	385.96	28.3458	385.96	-10.2248
386.313	2.43765	428.019	3.78487	428.851	4.59032	428.851	4.46295	430.514	-0.271056	428.501	28.1768	395.991	20.8675	386.694	22.193	390.039	-2.16076	392.648	1.60082	386.797	-15.3866	392.648	26.7221	386.797	14.1884	386.797	-0.197959	386.797	-22.1761
387.149	1.23393	428.851	4.12805	429.682	5.13714	429.682	6.0025	431.345	0.600536	429.332	28.2449	396.826	25.4816	387.529	-0.487263	390.875	0.496726	393.485	0.113012	387.633	-19.1703	393.485	27.5882	387.633	6.60135	387.633	-15.1486	387.633	-39.9688
387.986	0.31767	429.682	3.0615	430.514	3.38798	430.514	5.144	432.177	2.76899	430.164	19.5549	397.66	32.2393	388.367	-5.97349	391.71	2.80402	394.32	0.765848	388.47	-17.8104	394.32	28.9229	388.47	-17.8127	388.47	-32.8423	388.47	-43.9904
388.822	0.506312	430.514	0.0797415	431.345	2.62374	431.345	5.48137	433.008	4.07535	430.995	17.253	398.497	33.2455	389.202	-0.29326	392.547	3.78754	395.154	0.367563	389.306	-17.2197	395.154	29.2175	389.306	-31.4634	389.306	-38.1777	389.306	-43.8871
389.657	1.29273	431.345	-0.776056	432.177	3.90153	432.177	5.57746	433.839	5.6915	431.827	18.2972	399.331	30.4997	390.039	4.23197	393.382	5.90359	395.991	2.30522	390.141	-16.0981	395.991	24.3296	390.141	-21.0586	390.141	-41.3639	390.141	-56.5931
390.494	1.45769	432.177	-1.807	433.008	5.63122	433.008	4.44892	434.67	6.69013	432.658	8.39493	400.165	28.3998	390.875	13.6479	394.216	7.54527	396.826	3.62955	390.978	-14.8318	396.826	25.8489	390.978	-19.824	390.978	2.95995	390.978	-74.5408
391.329	1.01997	433.008	-3.17257	433.839	3.99889	433.839	3.4824	435.501	7.12355	433.489	7.60946	401.002	34.9928	391.71	10.792	395.053	6.98149	397.66	5.90076	391.813	-17.8325	397.66	22.0826	391.813	-12.9239	391.813	17.2413	391.813	-58.1129
392.164	1.79659	433.839	-2.09464	434.67	2.61806	434.67	0.561814	436.333	7.1976	434.321	3.01927	401.836	35.1472	392.547	-0.306795	395.888	4.79341	398.497	7.86366	392.648	-20.2647	398.497	15.9488	392.648	26.3656	392.648	33.6059	392.648	-78.4074
393.001	1.45034	434.67	-1.44959	435.501	0.00730168	435.501	1.47993	437.163	4.54342	435.152	-0.0454025	402.67	24.4445	393.382	6.00056	396.722	3.13931	399.331	3.71294	393.485	-22.874	399.331	7.14553	393.485	65.7944	393.485	18.0991	393.485	-80.1443
393.836	0.520195	435.501	-0.502656	436.333	-2.00228	436.333	0.700689	437.994	0.178666	435.985	10.0249	403.504	25.618	394.216	4.75984	397.559	6.1147	400.165	-0.182136	394.32	-23.1412	400.165	-1.88489	394.32	54.3143	394.32	-7.56956	394.32	-59.9325
394.671	-1.02569	436.333	-0.113916	437.163	0.292067	437.163	0.894273	438.825	-2.81858	436.816	7.1963	404.34	25.2732	395.053	25.658	398.394	11.2956	401.002	-2.59269	395.154	-23.4374	401.002	-0.422413	395.154	10.2057	395.154	-9.92622	395.154	-38.9349
395.508	-2.42458	437.163	3.87031	437.994	2.0826	437.994	1.52623	439.656	-0.158965	437.647	2.28829	405.174	31.8533	395.888	23.4337	399.228	8.81192	401.836	-6.36159	395.991	-17.9482	401.836	4.78854	395.991	-25.808	395.991	5.15635	395.991	19.24
396.342	-1.54997	437.994	7.92289	438.825	4.19198	438.825	2.83783	440.486	1.02173	438.478	0.249714	406.007	28.6983	396.722	14.5547	400.064	5.50373	402.67	-5.91283	396.826	-13.2829	402.67	13.5101	396.826	-43.0432	396.826	16.6568	396.826	65.2258
397.177	-1.57528	438.825	10.9118	439.656	5.02356	439.656	0	441.317	4.61135	439.308	4.83083	406.843	8.5848	397.559	-7.09239	400.898	2.82637	403.504	6.06754	397.66	-10.0524	403.504	17.2373	397.66	-49.2164	397.66	39.9122	397.66	102.476
398.013	-1.23475	439.656	11.1182	440.486	3.60784	440.486	0.155007	442.147	5.87017	440.139	10.1565	407.677	-20.1418	398.394	-13.3275	401.733	-3.90924	404.34	11.3561	398.497	-9.03454	404.34	18.4336	398.497	-39.2496	398.497	55.5793	398.497	69.4749
398.848	0.730886	440.486	7.5968	441.317	-0.021905	441.317	2.07682	442.978	7.44691	440.97	18.2382	408.51	-35.8961	399.228	-7.01118	402.569	-2.45134	405.174	13.421	399.331	-13.4259	405.174	16.3783	399.331	-11.0919	399.331	59.727	399.331	36.3503
399.682	0.198442	441.317	1.7059	442.147	2.14751	442.147	2.35597	443.808	10.4686	441.8	21.7978	409.344	-42.9703	400.064	10.4671	403.403	-8.3301	406.007	12.7901	400.165	-15.3441	406.007	10.6988	400.165	17.5638	400.165	57.672	400.165	-35.5439
400.519	1.37766	442.147	-3.49866	442.978	2.23918	442.978	1.2113	444.638	12.3375	442.631	20.9124	410.177	-36.8225	400.898	18.322	404.237	-4.95733	406.843	10.9819	401.002	-12.8454	406.843	10.7556	401.002	-8.18448	401.002	43.6075	401.002	-49.9041
401.353	1.39318	442.978	-1.35988	443.808	2.40225	443.808	1.2085	445.469	12.6826	443.461	21.5026	411.013	-6.70366	401.733	8.79781	405.071	-0.715286	407.677	7.70566	401.836	-11.6489	407.677	11.1851	401.836	-10.8728	401.836	54.8911	401.836	5.57247
402.187	2.31434	443.808	-2.08752	444.638	1.59745	444.638	-0.306508	446.299	11.1948	444.291	18.2972	411.846	13.1577	402.569	10.5799	405.906	3.1567	408.51	7.46428	402.67	-8.95794	408.51	13.7231	402.67	40.0561	402.67	60.4622	402.67	45.6653
403.021	3.2061	444.638	-3.82759	445.469	2.00553	445.469	-2.15187	447.129	8.83616	445.121	10.261	412.679	22.023	403.403	17.1399	406.74	2.15828	409.344	3.21261	403.504	-1.52845	409.344	11.2774	403.504	36.5115	403.504	67.3625	403.504	-2.59497
403.857	4.02518	445.469	-2.69412	446.299	3.37257	446.299	-6.65269	447.959	6.35997	445.952	-0.440405	413.512	25.0467	404.237	25.3693	407.574	1.45541	410.177	0.781209	404.34	7.17418	410.177	9.215	404.34	7.57711	404.34	70.9258	404.34	-46.2649
404.691	4.4335	446.299	-2.84649	447.129	6.35327	447.129	-11.6466	448.789	6.91635	446.78	-7.90458	414.347	32.9573	405.071	33.5896	408.407	0.75254	411.013	-0.359883	405.174	10.3383	411.013	3.4574	405.174	-29.0141	405.174	77.9486	405.174	-52.6438
405.525	3.68056	447.129	-4.07678	447.959	8.28903	447.959	-11.0553	449.618	8.05424	447.61	-13.9386	415.18	37.4067	405.906	53.6531	409.243	2.82141	411.846	2.79019	406.007	5.91977	411.846	0.11004	406.007	-18.2906	406.007	75.4977	406.007	-47.2574
406.358	2.91129	447.959	-5.23019	448.789	4.97326	448.789	-9.66025	450.448	9.02706	448.439	-18.1201	416.013	26.8995	406.74	55.5751	410.076	3.75028	412.679	1.49439	406.843	-0.326796	412.679	0.649594	406.843	-24.6331	406.843	54.7309	406.843	-74.5511
407.194	2.396	448.789	-5.92508	449.618	5.36755	449.618	-4.90973	451.278	6.04068	449.269	-8.76269	416.846	22.6946	407.574	42.9333	410.909	4.40596	413.512	8.03372	407.677	2.74372	413.512	3.62424	407.677	-12.6252	407.677	38.3286	407.677	-31.3671
408.028	2.00238	449.618	-3.80196	450.448	3.2168	450.448	-2.59234	452.107	2.97143	450.099	4.02266	417.678	6.41286	408.407	40.2443	411.743	2.30978	414.347	9.70147	408.51	-2.86967	414.347	4.13894	408.51	-4.64982	408.51	5.79736	408.51	-27.9761
408.861	2.12161	450.448	-1.20182	451.278	2.75192	451.278	-0.94337	452.937	0.130433	450.929	6.51526	418.511	3.76486	409.243	29.6644	412.576	5.98555	415.18	9.60711	409.344	-7.05844	415.18	10.0669	409.344	-41.4899	409.344	0.047133	409.344	-9.72856
409.695	2.23186	451.278	-0.595213	452.107	0.618209	452.107	-2.23253	453.764	-1.72824	451.758	15.6366	419.346	2.68146	410.076	22.2742	413.411	3.15173	416.013	4.41954	410.177	-9.48047	416.013	9.52738	410.177	-40.7432	410.177	23.2083	410.177	25.288
410.53	2.39763	452.107	-0.187962	452.937	2.49718	452.937	-5.25973	454.594	-1.69495	452.588	7.35975	420.178	-0.774587	410.909	22.3419	414.244	-2.6103	416.846	0.868985	411.013	-3.99474	416.846	12.3742	411.013	-50.1025	411.013	30.9758	411.013	49.4699
411.363	3.93454	452.937	-0.232105	453.764	2.45418	453.764	-6.76351	455.423	2.6141	453.417	19.1689	421.01	-18.1166	411.743	16.6888	415.077	-1.7907	417.678	-2.65852	411.846	-4.75215	417.678	14.5786	411.846	-42.9834	411.846	38.2343	411.846	29.6096
412.196	6.36728	453.764	-1.81697	454.594	1.45141	454.594	-8.56117	456.252	6.88238	454.247	13.816	421.843	-5.13389	412.576	-11.8206	415.91	0.968616	418.511	-3.57579	412.679	-9.04134	418.511	15.6541	412.679	-9.3992	412.679	40.4684	412.679	-56.4587
413.03	8.05036	454.594	-1.3912	455.423	-0.236899	455.423	-7.73984	457.081	3.8043	455.076	-9.02148	422.675	-2.53735	413.411	8.21129	416.743	5.31994	419.346	-5.89198	413.512	-13.4259	419.346	15.8068	413.512	27.0426	413.512	37.9892	413.512	-77.8181
413.863	8.26187	455.423	0.371652	456.252	-0.197145	456.252	-3.40665	457.91	-2.25405	455.905	-5.78428	423.507	8.28371	414.244	12.8809	417.577	7.59743	420.178	-7.60582	414.347	-13.6761	420.178	11.1283	414.347	50.0328	414.347	40.5061	414.347	-81.4159
414.698	8.11896	456.252	2.60441	457.081	1.72157	457.081	-1.40769	458.739	-3.56585	456.734	-13.5209	424.339	18.3533	415.077	13.3952	418.41	10.5629	421.01	-7.90206	415.18	-12.5306	421.01	5.56237	415.18	51.5164	415.18	57.7662	415.18	-41.4162
415.53	7.93195	457.081	1.95794	457.91	1.13987	457.91	-0.320535	459.568	-6.61744	457.562	-5.64807	425.173	40.6028	415.91	0.500798	419.243	9.08264	421.843	-13.139	416.013	-9.55196	421.843	0.748985	416.013	42.854	416.013	67.3625	416.013	-20.8321
416.363	6.92668	457.91	1.55496	458.739	-3.02127	458.739	-0.945474	460.395	-6.73836	458.391	-4.83991	426.005	47.2087	416.743	-0.207538	420.075	5.61549	422.675	-8.57465	416.846	-3.48922	422.675	-2.26115	416.846	2.2801	416.846	35.2272	416.846	-40.5787
417.196	6.11903	458.739	0.0982529	459.568	-6.18452	459.568	-2.27671	461.224	-7.45439	459.22	-0.326898	426.837	49.1284	417.577	-5.97349	420.907	2.49108	423.507	-2.58391	417.678	4.10877	423.507	-7.37981	417.678	-11.6096	417.678	34.4165	417.678	-23.8096
418.029	5.30076	459.568	-3.07859	460.395	-5.40568	460.395	-2.24866	462.053	-2.37565	460.048	8.95338	427.669	39.5631	418.41	1.96259	421.74	-0.529013	424.339	-1.85976	418.511	-3.9624	424.339	-7.02129	418.511	6.96975	418.511	30.5045	418.511	-32.9179
418.861	3.36861	460.395	-5.05219	461.224	-5.10631	461.224	-2.49625	462.881	-0.377033	460.877	12.6128	428.501	14.3363	419.243	14.3472	422.574	-3.2933	425.173	-1.85537	419.346	-7.5197	425.173	1.79969	419.346	-9.96674	419.346	11.7173	419.346	-5.69653
419.696	1.98442	461.224	-7.39745	462.053	-3.8991	462.053	-3.21447	463.71	-0.919825	461.706	11.8364	429.332	9.94869	420.075	8.05789	423.406	-0.529013	426.005	-3.09521	420.178	-3.3854	426.005	7.58214	420.178	-10.2754	420.178	6.50436	420.178	30.0438
420.528	1.86764	462.053	-7.49997	462.881	-1.37596	462.881	-3.16538	464.538	-1.27036	462.535	22.2291	430.164	11.5751	420.907	5.19296	424.238	5.30007	426.837	-3.81717	421.01	-0.711461	426.837	8.76774	421.01	-0.527709	421.01	-14.6678	421.01	26.0841
421.361	2.95539	462.881	-7.72211	463.71	1.07091	463.71	0.00140278	465.364	-0.798903	463.361	19.2053	430.995	8.25798	421.74	12.9215	425.07	14.9465	427.669	-2.41275	421.843	-1.63228	427.669	8.60446	421.843	0.358444	421.843	-25.0936	421.843	14.7634
422.193	2.56341	463.71	-2.60157	464.538	1.80433	464.538	1.03104	466.193	-0.175949	464.19	14.8103	431.827	7.41648	422.574	14.5006	425.902	15.0235	428.501	-0.0965539	422.675	-2.52586	428.501	3.62424	422.675	-9.75765	422.675	-16.9208	422.675	11.7963
423.025	1.00772	464.538	-0.0498384	465.364	4.51163	465.364	0.629147	467.021	5.06515	465.018	12.2678	432.658	-1.84254	423.406	-12.2267	426.734	16.9086	429.332	-0.064735	423.507	-6.21933	429.332	1.7287	423.507	-40.9523	423.507	-15.4879	423.507	15.2493
423.857	0.326653	465.364	0.437154	466.193	3.6046	466.193	-1.20709	467.849	5.9021	465.846	1.71622	433.489	-5.83385	424.238	-33.9505	427.566	14.7279	430.164	-0.264426	424.339	-10.0047	430.164	3.01014	424.339	-59.5416	424.339	-7.4753	424.339	13.6158
424.689	1.41686	466.193	6.30527	467.021	4.01998	467.021	-1.70578	468.677	7.2798	466.675	-1.50282	434.321	-12.8772	425.07	-35.1055	428.398	6.52947	430.995	5.83932	425.173	-11.9893	430.995	13.9041	425.173	-29.5916	425.173	-0.697569	425.173	26.2392
425.521	1.93052	467.021	8.87124	467.849	4.79396	467.849	-3.92007	469.503	4.57331	467.501	-34.1518	435.152	-8.31717	425.902	-19.3777	429.229	0.973584	431.827	7.24154	426.005	-6.12231	431.827	16.7723	426.005	-7.73642	426.005	-18.3725	426.005	46.1926
426.355	2.48991	467.849	8.35719	468.677	5.30589	468.677	-2.12732	470.331	3.05295	468.329	-17.8069	435.985	-4.2435	426.734	-6.50587	430.061	6.24633	432.658	6.355	426.837	-4.79641	432.658	20.9751	426.837	-7.70655	426.837	-13.612	426.837	72.5972
427.187	3.35718	468.677	5.42669	469.503	5.443	469.503	-0.549189	471.159	-2.36002	469.157	-14.6514	436.816	-11.0192	427.566	23.3796	430.895	15.0309	433.489	3.50776	427.669	-0.0595721	433.489	23.2008	427.669	12.9836	427.669	-2.14927	427.669	118.614
428.019	3.68546	469.503	-0.365956	470.331	3.38392	470.331	-0.540772	471.987	-3.04887	469.985	-7.68211	437.647	-10.6384	428.398	48.9248	431.726	13.1359	434.321	0.0153608	428.501	2.96669	434.321	15.8032	428.501	24.414	428.501	34.2846	428.501	100.18
428.851	3.84062	470.331	-2.41645	471.159	0.295312	471.159	-1.14818	472.812	0.529205	470.813	-0.89443	438.478	4.74274	429.229	33.2332	432.557	12.0059	435.152	-7.42807	429.332	3.35987	435.152	26.7434	429.332	11.2113	429.332	44.9555	429.332	58.9813
429.682	2.60424	471.159	-1.78279	471.987	-0.468119	471.987	-1.63775	473.64	1.15352	471.638	-0.458566	439.308	7.22348	430.061	44.5079	433.389	10.6622	435.985	-7.23825	430.164	2.04758	435.985	30.2469	430.164	0.657148	430.164	29.0622	430.164	-6.65801
430.514	1.73779	471.987	-5.06501	472.812	4.64387	472.812	-3.36948	474.468	2.42524	472.466	0.967074	440.139	-1.31242	430.895	45.3019	434.22	5.69993	436.816	-8.02934	430.995	0.549765	436.816	26.644	430.995	-19.3958	430.995	36.481	430.995	-33.6209
431.345	-0.814183	472.812	-6.15718	473.64	3.42368	473.64	-0.044889	475.295	1.19156	473.294	0.54029	440.97	-38.6882	431.726	37.4606	435.051	5.61797	437.647	-11.6304	431.827	-4.15813	437.647	24.7591	431.827	-60.5572	431.827	-2.68658	431.827	-121.964
432.177	-1.35561	473.64	-6.4434	474.468	1.59907	474.468	1.717	476.121	0.448364	474.121	-1.7934	441.8	-36.3336	432.557	33.5445	435.882	7.12554	438.478	-12.7627	432.658	-8.85412	438.478	22.3595	432.658	-56.0766	432.658	13.5649	432.658	-18.2475
433.008	-2.74307	474.468	-3.53995	475.295	-2.33329	475.295	2.976	476.948	0.689529	474.947	-2.61065	442.631	-36.2666	433.389	27.9906	436.713	6.87966	439.308	-12.4083	433.489	-11.86	439.308	12.9741	433.489	-57.9385	433.489	10.0676	433.489	16.3762
433.839	-0.437715	475.295	-2.00635	476.121	-3.21193	476.121	3.6332	477.775	0.0394017	475.774	0.0408623	443.461	-3.62589	434.22	26.4882	437.544	1.04809	440.139	-10.8009	434.321	-9.23878	440.139	7.68508	434.321	-83.0495	434.321	23.8682	434.321	-10.9692
434.67	-1.2764	476.121	-1.69023	476.948	-0.513552	476.948	1.93233	478.602	-0.523091	476.602	-0.476727	444.291	30.8137	435.051	35.9627	438.375	-4.98713	440.97	-7.36772	435.152	0.72678	440.97	6.40365	435.152	-83.0694	435.152	33.6059	435.152	-17.0276
435.501	-0.503046	476.948	-3.07717	477.775	0.653095	477.775	0.884453	479.427	-0.566569	477.429	-9.87959	445.121	29.5836	435.882	45.1937	439.206	-6.98149	441.8	-7.4544	435.985	0.0153185	441.8	2.51318	435.985	-47.7926	435.985	42.1935	435.985	-31.1086
436.333	-0.626357	477.775	-4.33737	478.602	0.243389	478.602	0.0105209	480.254	-1.39944	478.254	-13.5436	445.952	15.2293	436.713	46.0554	440.036	-2.32965	442.631	-7.86475	436.816	-4.55642	442.631	-0.102941	436.816	-7.08923	436.816	29.0811	436.816	-62.238
437.163	-0.88278	478.602	-4.9696	479.427	-0.345613	479.427	-2.5222	481.081	-0.909635	479.081	-12.9034	446.78	-15.569	437.544	55.4668	440.867	0.66313	443.461	-10.1118	437.647	-9.11113	443.461	-1.26369	437.647	-29.5916	437.647	-9.94507	437.647	-114.437
437.994	-1.85866	479.427	-4.13659	480.254	-0.893239	480.254	-3.57639	481.906	1.74183	479.908	-6.78768	447.61	-34.3289	438.375	58.3994	441.697	-1.30391	444.291	-12.0978	438.478	-12.3025	444.291	-0.308823	438.478	-22.0244	438.478	-27.2994	438.478	-131.248
438.825	-0.711287	480.254	-2.48053	481.081	-0.932993	481.081	-2.79785	482.733	2.87768	480.735	-13.7524	448.439	-49.9699	439.206	44.4718	442.528	-0.668097	445.121	-10.3916	439.308	-16.8385	445.121	-2.15111	439.308	-46.299	439.308	-26.1211	439.308	-128.57
439.656	-2.01382	481.081	-1.00246	481.906	0.682302	481.906	-2.04245	483.56	2.17524	481.56	-11.9045	449.269	-54.6586	440.036	27.1018	443.358	-0.817115	445.952	-8.12808	440.139	-20.3737	445.952	-0.518255	440.139	-83.1093	440.139	-21.0496	440.139	-113.238
440.486	-2.70632	481.906	-0.296183	482.733	2.28543	482.733	0.239174	484.384	-1.16167	482.387	-12.5356	450.099	-39.5786	440.867	12.6327	444.188	-4.23956	446.78	-6.92555	440.97	-19.4375	446.78	5.95283	440.97	-62.2	440.97	6.38181	440.97	-96.872
441.317	-2.30699	482.733	5.10061	483.56	1.37921	483.56	1.77101	485.211	-5.66637	483.214	-10.3018	450.929	-56.5063	441.697	9.65503	445.019	-4.57237	447.61	-5.10748	441.8	-17.0359	447.61	14.0248	441.8	-44.7557	441.8	32.0222	441.8	-104.388
442.147	-2.10446	483.56	7.76198	484.384	-1.48224	484.384	3.17028	486.038	-6.76146	484.039	0.254254	451.758	-48.606	442.528	2.77018	445.849	-2.42651	448.439	0.143734	442.631	-13.8905	448.439	24.0492	442.631	-23.6075	442.631	24.6034	442.631	-39.8344
442.978	-2.3323	484.384	9.71564	485.211	-4.40859	485.211	3.51116	486.862	-5.79612	484.865	17.816	452.588	-30.4276	443.358	-0.721871	446.679	3.46467	449.269	-0.343425	443.461	-10.0422	449.269	24.5852	443.461	-47.1454	443.461	17.6749	443.461	-30.9949
443.808	-3.22651	485.211	7.0144	486.038	-5.85595	486.038	1.8685	487.688	-2.62972	485.692	32.4492	453.417	5.59968	444.188	4.66058	447.509	5.75954	450.099	-4.14743	444.291	-7.00398	450.099	20.0345	444.291	-69.0304	444.291	6.59862	444.291	-9.04622
444.638	-3.72466	486.038	3.67808	486.862	-7.64811	486.862	0.578647	488.515	-1.33898	486.516	29.5207	454.247	6.38713	445.019	2.86041	448.339	5.7968	450.929	-9.88142	445.121	-3.77687	450.929	14.8945	445.121	-63.7931	445.121	-5.18463	445.121	6.36854
445.469	-4.52659	486.862	0.887124	487.688	-6.31595	487.688	0.533057	489.339	0.0584232	487.343	18.2427	455.076	-0.772014	445.849	-0.0225585	449.169	-2.69226	451.758	-11.3264	445.952	-2.04758	451.758	13.3113	445.952	-60.8758	445.952	-9.93564	445.952	25.836
446.299	-5.05251	487.688	-1.92376	488.515	-1.93332	488.515	0.795377	490.165	0.145379	488.169	-6.22015	455.905	-10.1803	446.679	1.33095	449.998	-3.73538	452.588	-10.3784	446.78	-7.16738	452.588	11.2561	446.78	-80.3612	446.78	-14.1965	446.78	-36.2882
447.129	-5.66498	488.515	-7.78191	489.339	-1.50901	489.339	1.89866	490.991	-2.00473	488.993	-18.8103	456.734	-30.0262	447.509	9.87159	450.828	2.74441	453.417	-4.86061	447.61	-10.9323	453.417	10.0066	447.61	-77.8621	447.61	-16.8265	447.61	-67.0557
447.959	-6.23009	489.339	-9.00936	490.165	-0.141977	490.165	4.32057	491.815	1.16371	489.819	-19.5776	457.562	-24.1821	448.339	6.61866	451.656	11.1441	454.247	-1.73907	448.439	-12.3161	454.247	7.34786	448.439	-65.197	448.439	-42.6742	448.439	-112.39
448.789	-5.39386	490.165	-10.8292	490.991	-0.401592	490.991	5.92324	492.641	2.37429	490.645	-28.2495	458.391	-22.0925	449.169	7.55258	452.485	24.0391	455.076	-6.56567	449.269	-16.2666	455.076	5.28549	449.269	-60.3381	449.269	-58.0867	449.269	-138.433
449.618	-5.34078	490.991	-6.28961	491.815	-1.3216	491.815	7.09807	493.465	-4.32467	491.469	-26.4515	459.22	-27.2495	449.998	8.28798	453.315	26.7661	455.905	-8.36947	450.099	-15.9636	455.905	2.19726	450.099	-81.8049	450.099	-88.0351	450.099	-104.326
450.448	-4.94144	491.815	-0.888548	492.641	-1.51956	492.641	6.82313	494.29	-1.58558	492.295	-19.1054	460.048	-33.8168	450.828	-5.24259	454.144	20.8103	456.734	-8.60866	450.929	-18.515	456.734	-1.66126	450.929	-100.006	450.929	-78.1371	450.929	-61.018
451.278	-4.35918	492.641	-0.0227833	493.465	1.10174	493.465	8.14455	495.116	-0.69904	493.119	-8.09073	460.877	-42.0259	451.656	-20.6951	454.973	0.00496726	457.562	-7.46208	451.758	-18.7516	457.562	-2.69777	451.758	-89.621	451.758	-47.5101	451.758	-12.8301
452.107	-3.92229	493.465	0.30615	494.29	1.71103	494.29	10.2172	495.94	3.18202	493.945	-0.0227013	461.706	-28.1013	452.485	-14.4961	455.803	-6.58411	458.391	-4.786	452.588	-16.4998	458.391	-1.6861	452.588	-87.9981	452.588	-1.40456	452.588	-16.2315
452.937	-4.22281	494.29	-3.05581	495.116	-0.64985	495.116	9.66867	496.765	1.0523	494.771	3.75025	462.535	0.787454	453.315	-23.6097	456.632	-11.077	459.22	-3.51873	453.417	-13.8463	459.22	-0.68864	453.417	-56.903	453.417	17.8728	453.417	-24.4093
453.764	-4.48168	495.116	-7.51848	495.94	-0.00892428	495.94	9.9871	497.589	0.490483	495.594	3.52324	463.361	3.51266	454.144	-34.1671	457.461	-6.95168	460.048	-3.61748	454.247	-19.3984	460.048	0.291075	454.247	-57.3511	454.247	-0.131972	454.247	-36.9086
454.594	-4.67032	495.94	-10.6056	496.765	-1.04495	496.765	10.4353	498.414	-1.46737	496.42	0.594773	464.19	16.7244	454.973	-28.2342	458.29	2.09122	460.877	-5.19306	455.076	-24.7599	460.877	-4.17444	455.076	-74.7954	455.076	-30.4008	455.076	-107.893
455.423	-5.2093	496.765	-9.63448	497.589	-1.73456	497.589	9.58099	499.237	-3.82128	497.243	-3.6322	465.018	12.4269	455.803	-13.4809	459.119	7.51795	461.706	-2.49175	455.905	-22.5438	461.706	-5.27484	455.905	-90.3479	455.905	-21.4738	455.905	-109.568
456.252	-4.7528	497.589	-9.82814	498.414	-1.33702	498.414	10.389	500.063	-4.46937	498.069	-4.20427	465.846	11.1119	456.632	5.42757	459.946	11.1689	462.535	-0.505811	456.734	-16.8861	462.535	-4.93762	456.734	-104.646	456.734	-25.2067	456.734	-69.1958
457.081	-4.76913	498.414	-10.1685	499.237	-1.2567	499.237	9.45895	500.888	-6.71459	498.894	5.41652	466.675	21.2098	457.461	13.8509	460.775	9.53218	463.361	1.94534	457.562	-10.9919	463.361	1.83874	457.562	-44.1185	457.562	-29.0905	457.562	-49.4802
457.91	-4.8067	499.237	-8.15926	500.063	-1.77918	500.063	7.17873	501.711	0.716023	499.717	0.422244	467.501	40.8215	458.29	17.8122	461.603	4.4457	464.19	3.58347	458.391	-5.65424	464.19	4.12474	458.391	16.5283	458.391	-37.7724	458.391	19.85
458.739	-3.71568	500.063	-8.30593	500.888	-1.87653	500.888	6.39528	502.536	-3.50675	500.543	-4.48577	468.329	32.3989	459.119	15.3939	462.432	4.13276	465.018	5.67803	459.22	-2.32161	465.018	3.51775	459.22	32.25	459.22	-12.7731	459.22	44.9313
459.568	-3.11219	500.888	-12.1862	501.711	-1.46439	501.711	7.05318	503.359	-3.8206	501.366	-8.17246	469.157	17.0924	459.946	15.3759	463.261	6.70332	465.846	3.15117	460.048	2.26544	465.846	0.156186	460.048	31.9812	460.048	8.9647	460.048	52.2613
460.395	-2.68264	501.711	-11.8502	502.536	-1.18206	502.536	5.99128	504.184	-4.92317	502.191	-12.068	469.985	29.9722	460.775	3.89359	464.089	3.53421	466.675	-1.65239	460.877	2.95988	466.675	-2.65872	460.877	0.637234	460.877	37.6122	460.877	15.5388
461.224	-2.99051	502.536	-9.50348	503.359	-0.871334	503.359	6.09789	505.006	-4.94015	503.014	-0.17707	470.813	27.2084	461.603	-5.29673	464.915	-2.86114	467.501	-1.09062	461.706	2.26374	467.501	-8.98782	461.706	-4.32124	461.706	53.0718	461.706	58.5471
462.053	-3.4813	503.359	-5.95213	504.184	-0.11845	504.184	6.27464	505.831	0.53464	503.839	-1.12598	471.638	20.8958	462.432	2.12501	465.744	-8.4965	468.329	-5.31376	462.535	1.86205	468.329	-13.0451	462.535	-8.99098	462.535	60.4057	462.535	31.8117
462.881	-3.52377	504.184	-4.55808	505.006	0.236088	505.006	7.07633	506.654	-2.17321	504.661	-3.40973	472.466	11.5982	463.261	-3.21233	466.572	-10.4188	469.157	-6.29356	463.361	-1.22378	469.157	-18.217	463.361	-20.4512	463.361	43.221	463.361	4.15609
463.71	-4.3943	505.006	-4.04403	505.831	0.299369	505.831	6.40159	507.478	-3.79954	505.486	-1.19863	473.294	-3.7417	464.089	4.30867	467.4	-7.79612	469.985	-5.99402	464.19	4.11048	469.985	-19.8002	464.19	-20.5408	464.19	31.664	464.19	-20.4703
464.538	-5.24033	505.831	-3.57555	506.654	0.8689	506.654	6.82242	508.301	-0.387223	506.309	5.86601	474.121	-5.51218	464.915	-1.62421	468.228	-3.718	470.813	-2.59269	465.018	0.183822	470.813	-20.3468	465.018	-2.94721	465.018	18.3819	465.018	-44.5281
465.364	-5.47552	506.654	-6.09738	507.478	0.113582	507.478	6.36863	509.125	2.8342	507.133	2.27467	474.947	9.75311	465.744	-18.2408	469.054	-0.583653	471.638	-1.03137	465.846	-4.5462	471.638	-13.2546	465.846	26.485	465.846	-0.593876	465.846	-81.9535
466.193	-5.35548	507.478	-2.88066	508.301	-2.77139	508.301	4.00775	509.948	1.04618	507.956	5.25761	475.774	18.5129	466.572	-10.1964	469.882	3.87446	472.466	-1.73029	466.675	-11.3613	472.466	-7.29817	466.675	21.9149	466.675	-7.92778	466.675	-104.326
467.021	-5.80381	508.301	2.67134	509.125	-1.94306	509.125	2.14345	510.772	-0.00135868	508.78	11.9953	476.602	40.523	467.4	-4.1282	470.71	6.64868	473.294	-4.02125	467.501	-12.1238	473.294	-2.21501	467.501	24.9417	467.501	-17.92	467.501	-133.563
467.849	-6.12066	509.125	6.22411	509.948	-0.977614	509.948	1.40839	511.594	-2.82265	509.603	23.8681	477.429	43.1041	468.228	-12.1229	471.538	5.62046	474.121	-5.22379	468.329	-11.8906	474.121	3.05629	468.329	-22.7114	468.329	-26.9695	468.329	-118.769
468.677	-6.23009	509.948	6.31524	510.772	2.13128	510.772	2.27531	512.418	-5.44015	510.427	13.53	478.254	38.2533	469.054	-18.4032	472.366	-7.23233	474.947	-5.01422	469.157	-4.48323	474.947	10.6207	469.157	-39.2795	469.157	-20.0315	469.157	-69.0097
469.503	-6.87523	510.772	3.25943	511.594	0.767488	511.594	1.72402	513.24	-1.38178	511.249	0.0817246	479.081	23.2634	469.882	-12.9801	473.191	-7.06096	475.774	-0.235899	469.985	3.66113	475.774	13.2439	469.985	-32.6383	469.985	-2.58289	469.985	-29.1753
470.331	-7.31866	511.594	0.0199354	512.418	1.37758	512.418	3.0279	514.062	0.00475537	512.073	-7.33705	479.908	13.2606	470.71	-14.5412	474.019	-0.0397381	476.602	2.00569	470.813	7.81246	476.602	17.9047	470.813	-9.9767	470.813	3.07307	470.813	18.5266
471.159	-8.57464	512.418	0.551071	513.24	2.1402	513.24	3.35615	514.886	-0.296871	512.896	-13.371	480.735	-3.45605	471.538	-24.2684	474.847	7.11064	477.429	3.15556	471.638	10.2158	477.429	22.4412	471.638	28.8946	471.638	17.2413	471.638	67.8311
471.987	-9.56113	513.24	3.24519	514.062	1.61043	514.062	2.20728	515.708	-3.44968	513.719	-20.5492	481.56	-4.45967	472.366	-27.3319	475.674	11.4048	478.254	1.43624	472.466	9.18091	478.254	21.5431	472.466	66.0434	472.466	25.5084	472.466	94.1427
472.812	-10.3043	514.062	8.02399	514.886	-0.570342	514.886	3.08261	516.532	-5.08621	514.541	-3.27352	482.387	-11.2817	473.191	-16.1022	476.499	10.9429	479.081	-0.424618	473.294	5.6985	479.081	11.0821	473.294	63.3849	473.294	52.5627	473.294	69.5887
473.64	-9.92617	514.886	3.87458	515.708	-0.42512	515.708	2.24866	517.353	-8.66089	515.365	3.5187	483.214	-21.8917	474.019	-9.9122	477.327	15.0781	479.908	-2.24159	474.121	5.65765	479.908	2.52028	474.121	50.3216	474.121	57.6908	474.121	24.3783
474.468	-8.81473	515.708	-0.17657	516.532	-0.305048	516.532	1.56059	518.177	-10.1106	516.187	15.0328	484.039	-33.3304	474.847	-0.58652	478.154	10.5033	480.735	-4.12439	474.947	12.1493	480.735	3.11663	474.947	44.8752	474.947	35.4723	474.947	1.65416
475.295	-7.42482	516.532	1.96791	517.353	0.511118	517.353	2.50607	518.998	-8.14935	517.011	4.15433	484.865	-31.614	475.674	1.67835	478.981	8.74238	481.56	-5.67145	475.774	21.1855	481.56	0.0638945	475.774	32.7578	475.774	49.3106	475.774	-3.47375
476.121	-5.49757	517.353	-0.341749	518.177	1.05388	518.177	2.68142	519.82	-4.38242	517.832	7.92274	485.692	-19.1408	476.499	4.58388	479.806	2.05148	482.387	-3.51654	476.602	22.0876	482.387	-5.55882	476.602	-0.627277	476.602	39.5163	476.602	18.6507
476.948	-4.91858	518.177	5.63886	518.998	1.19666	518.998	3.54763	520.643	-3.49316	518.654	16.9669	486.516	-1.67784	477.327	9.65052	480.633	8.79951	483.214	-2.89552	477.429	23.0561	483.214	-4.82048	477.429	-21.0287	477.429	67.7207	477.429	45.045
477.775	-3.9525	518.998	8.80289	519.82	-0.146034	519.82	4.8936	521.465	-3.76082	519.477	19.4595	487.343	-1.54145	478.154	2.892	481.46	12.8404	484.039	1.2168	478.254	13.4463	484.039	1.71805	478.254	-16.4984	478.254	83.9533	478.254	43.0807
478.602	-2.97336	519.82	11.4258	520.643	0.0016226	520.643	4.81434	522.288	-0.00951075	520.299	15.7274	488.169	3.88066	478.981	3.58229	482.285	10.1233	484.865	4.89463	479.081	18.7686	484.865	8.6151	479.081	-23.5578	479.081	84.0288	479.081	34.3343
479.427	-2.11998	520.643	10.6384	521.465	-1.28915	521.465	5.07386	523.109	1.57675	521.122	13.7025	488.993	14.5447	479.806	-2.19268	483.112	7.41364	485.692	8.66242	479.908	13.4939	485.692	15.6293	479.908	-30.5275	479.908	67.9187	479.908	23.2824
480.254	-1.61448	521.465	9.67293	522.288	-1.80108	522.288	3.57849	523.93	2.82741	521.943	9.42556	489.819	19.9874	480.633	-9.31214	483.938	7.8756	486.516	9.86935	480.735	14.2394	486.516	15.4802	480.735	-32.2898	480.735	50.5549	480.735	47.671
481.081	-2.88843	522.288	7.98554	523.109	-1.80189	523.109	3.47679	524.753	5.21189	522.765	11.7729	490.645	8.39437	481.46	-8.82488	484.763	11.4719	487.343	11.5766	481.56	6.83377	487.343	11.6643	481.56	-50.1424	481.56	49.122	481.56	46.0478
481.906	-5.33016	523.109	2.82228	523.93	-4.42076	523.93	2.79013	525.574	4.08283	523.588	10.3518	491.469	3.40201	482.285	-7.30895	485.589	16.2554	488.169	12.1252	482.387	4.65343	488.169	8.51926	482.387	-24.3443	482.387	39.2241	482.387	12.6337
482.733	-7.23945	523.93	1.19612	524.753	-0.11277	524.753	1.36771	526.395	1.24047	524.409	5.93411	492.295	0.517249	483.112	0.0225585	486.416	15.0632	488.993	4.62691	483.214	0.437429	488.993	5.88539	483.214	-4.6299	483.214	33.5304	483.214	35.4612
483.56	-8.47746	524.753	0.324662	525.574	-0.605228	525.574	0.498689	527.218	1.4796	525.232	1.20771	493.119	7.39847	483.938	6.80815	487.24	15.5028	489.819	-2.57294	484.039	6.50698	489.819	0.646044	484.039	31.7522	484.039	24.7448	484.039	10.3902
484.384	-8.94131	525.574	1.88959	526.395	-1.41896	526.395	2.28022	528.038	6.29136	526.053	-0.0771843	493.945	2.85645	484.763	16.2331	488.067	17.9964	490.645	-5.40921	484.865	8.30435	490.645	0.152637	484.865	36.7704	484.865	30.6647	484.865	-18.8058
485.211	-7.96543	526.395	3.16972	527.218	3.23951	527.218	4.75543	528.859	3.67115	526.873	0.776383	494.771	-20.2963	485.589	9.27153	488.893	21.5331	491.469	-5.23915	485.692	13.5433	491.469	-1.43408	485.692	40.5938	485.692	17.6466	485.692	16.6967
486.038	-8.86128	527.218	4.99523	528.038	2.0826	528.038	6.64708	529.681	2.37021	527.696	-0.576612	495.594	-14.6194	486.416	-11.7575	489.717	20.2739	492.295	-4.56437	486.516	14.9458	492.295	2.81846	486.516	43.312	486.516	50.2061	486.516	59.767
486.862	-7.92215	528.038	6.35654	528.859	2.88579	528.859	7.7167	530.502	3.24248	528.517	-0.708279	496.42	-19.6092	487.24	-16.1925	490.543	14.9117	493.119	-3.46497	487.343	14.6377	493.119	5.7363	487.343	39.4587	487.343	53.3075	487.343	29.2684
487.688	-5.59312	528.859	4.70048	529.681	2.743	529.681	7.90116	531.322	-0.957868	529.337	0.236093	497.243	-9.62444	488.067	-19.1567	491.369	8.55859	493.945	-2.72875	488.169	12.0506	493.945	7.00709	488.169	35.2371	488.169	-8.81388	488.169	-25.0503
488.515	-2.70142	529.681	1.89956	530.502	-1.26887	530.502	7.55187	532.145	0.000679339	530.16	-0.449485	498.069	-19.0533	488.893	-15.4706	492.193	1.32874	494.771	-2.8242	488.993	12.6225	494.771	9.49898	488.993	20.8296	488.993	-50.1684	488.993	-44.1869
489.339	0.229474	530.502	1.71159	531.322	-0.657151	531.322	5.00302	532.965	-2.95784	530.98	7.8955	498.894	-23.513	489.717	-17.943	493.019	4.324	495.594	-1.47684	489.819	11.7374	495.594	10.0918	489.819	9.67799	489.819	-58.2659	489.819	-21.5869
490.165	-0.153527	531.322	0.00142396	532.145	0.110337	532.145	2.70947	533.785	-4.44967	531.801	10.0703	499.717	-34.0227	490.543	-11.7485	493.843	9.49492	496.42	-1.48452	490.645	10.3826	496.42	7.5218	490.645	-1.46365	490.645	-48.8015	490.645	16.3142
490.991	-0.0596142	532.145	-1.65606	532.965	0.361028	532.965	-0.649488	534.607	-1.90351	532.623	8.09527	500.543	-34.2234	491.369	-3.75373	494.669	8.80944	497.243	-3.34428	491.469	6.32486	497.243	3.37221	491.469	0.209092	491.469	-17.4392	491.469	26.5287
491.815	0.383001	532.965	-0.00427186	533.785	0.623077	533.785	-1.67211	535.427	-3.48908	533.443	0.390462	501.366	-42.7155	492.193	0.378982	495.494	9.13976	498.069	-7.08245	492.295	6.95972	498.069	1.22109	492.295	-2.14071	492.295	-14.0551	492.295	25.6912
492.641	0.3879	533.785	1.92376	534.607	5.9168	534.607	-0.0869724	536.247	-3.78528	534.263	-2.25651	502.191	-50.9169	493.019	1.43923	496.318	10.7814	498.894	-8.80835	493.119	8.79114	498.894	-3.25862	493.119	8.17452	493.119	1.81933	493.119	33.7243
493.465	0.0367485	534.607	3.77775	535.427	7.30898	535.427	-0.29739	537.069	-1.88992	535.085	-11.2871	503.014	-51.4933	493.843	2.61678	497.143	6.78776	499.717	-8.45505	493.945	5.29	499.717	-6.19421	493.945	35.6154	493.945	9.3889	493.945	70.1159
494.29	-0.88278	535.427	2.78241	536.247	7.33657	536.247	-1.818	537.889	-1.07132	535.905	-14.0112	503.839	-60.4281	494.669	10.6566	497.967	2.54821	500.543	-7.90535	494.771	-1.33271	500.543	-3.41835	494.771	11.9083	494.771	8.02204	494.771	44.2903
495.116	-2.03586	536.247	2.69839	537.069	6.53582	537.069	-1.35579	538.709	-1.07403	536.725	2.41541	504.661	-57.6797	495.494	12.7049	498.792	-1.00339	501.366	-9.08594	495.594	-2.38799	501.366	0.468559	495.594	6.16325	495.594	2.06443	495.594	27.4695
495.94	-3.52622	537.069	-4.75601	537.889	3.80012	537.889	-1.79486	539.528	0.0163041	537.545	6.46986	505.486	-75.1993	496.318	12.9215	499.617	-0.295552	502.191	-6.41315	496.42	3.83985	502.191	-0.773833	496.42	9.56847	496.42	0.669289	496.42	-2.50192
496.765	-4.7626	537.889	-7.24793	538.709	2.15075	538.709	-0.112222	540.35	2.27986	538.367	-2.09306	506.309	-40.1962	497.143	12.5109	500.44	1.65161	503.014	-4.24069	497.243	5.6985	503.014	2.3002	497.243	-2.22036	497.243	14.7149	497.243	-40.0928
497.589	-5.39876	538.709	-7.29635	539.528	-3.56971	539.528	-0.400494	541.169	1.78326	539.187	0.395002	507.133	-42.4453	497.967	19.689	501.266	6.27614	503.839	-2.51369	498.069	4.52748	503.839	9.50963	498.069	-18.7486	498.069	32.682	498.069	-44.7452
498.414	-4.13543	539.528	-4.62501	540.35	0.624699	540.35	-0.624939	541.989	1.85595	540.006	-1.87512	507.956	-41.2564	498.792	20.6816	502.089	12.2468	504.661	1.50865	498.894	6.38273	504.661	8.65415	498.894	-18.44	498.894	34.096	498.894	-45.4068
499.237	-4.03171	540.35	-3.38617	541.169	1.25508	541.169	-1.20499	542.808	-0.0278529	540.826	0.939832	508.78	-31.3798	499.617	13.6298	502.914	17.9691	505.486	3.83802	499.717	5.4534	505.486	2.21856	499.717	-26.8833	499.717	24.5469	499.717	-53.2434
500.063	-1.78679	541.169	0.0142396	541.989	0.294501	541.989	-3.4824	543.628	-0.201084	541.647	0.467646	509.603	-25.7647	500.44	-6.6367	503.737	24.8711	506.309	5.80969	500.543	1.84674	506.309	-1.7074	501.366	1.71647	500.543	66.0334	500.543	37.4565
500.888	-1.05182	541.989	1.03237	542.808	0.227975	542.808	-4.47698	544.449	0.0686132	542.467	-0.976154	510.427	-18.2504	501.266	-17.1625	504.561	29.1727	507.133	1.4527	501.366	-0.0306371	507.133	-3.91176	502.191	12.6411	501.366	71.8402	501.366	49.2838
501.711	-0.566743	542.808	6.13155	543.628	0.621454	543.628	-4.55483	545.268	-0.0679339	543.286	-12.9806	511.249	-33.279	502.089	-5.50878	505.384	28.825	507.956	-4.81453	502.191	-0.888475	507.956	0.422413	503.014	17.1826	502.191	48.1511	502.191	41.6643
502.536	-1.96318	543.628	9.25001	544.449	-0.0973558	544.449	-4.30794	546.087	-0.508825	544.105	-9.6208	512.073	-39.4087	502.914	11.8387	506.209	23.4157	508.78	-5.58257	503.014	-1.87737	508.78	-2.12982	503.839	30.6998	503.014	47.3404	503.014	13.0059
503.359	-3.6577	544.449	10.2838	545.268	2.1256	545.268	-2.64494	546.906	-0.416435	544.927	-0.558451	512.896	-40.505	503.737	19.5492	507.031	17.6884	509.603	-1.62057	503.839	-5.50446	509.603	1.76775	504.661	-8.24263	503.839	22.6898	503.839	5.47942
504.184	-4.81568	545.268	7.52133	546.087	4.1433	546.087	0.683856	547.725	1.01561	545.746	-0.635635	513.719	-32.6665	504.561	24.3496	507.856	9.96681	510.427	-0.908485	504.661	-5.35468	510.427	4.96602	505.486	-3.3793	504.661	30.0237	504.661	22.2485
505.006	-5.16193	546.087	6.89337	546.906	6.40357	546.906	3.88149	548.546	0.0455157	546.565	-0.281496	514.541	-29.3906	505.384	22.6893	508.678	2.86611	511.249	0.990775	505.486	-3.29689	511.249	2.05172	506.309	3.21838	505.486	22.6993	505.486	42.3259
505.831	-4.35428	546.906	7.10126	547.725	4.6966	547.725	2.03824	549.365	0.247279	547.384	2.46536	515.365	-45.1062	506.209	21.3493	509.503	-4.61707	512.073	-5.82505	506.309	3.85176	512.073	-3.60294	507.133	22.6896	506.309	33.3136	506.309	21.0699
506.654	-3.98517	547.725	7.37751	548.546	14.046	548.546	1.59075	550.183	-1.70174	548.202	-0.0953453	516.187	-69.5199	507.031	27.4086	510.325	-7.18018	512.896	-6.41535	507.133	5.38362	512.896	-11.714	507.956	24.2272	507.133	26.2531	507.133	0.651327
507.478	-5.06394	548.546	8.52522	549.365	13.9235	549.365	-0.484661	551.002	-3.65044	549.023	-9.21217	517.011	-87.0806	507.856	12.6418	511.149	-8.70264	513.719	-4.60496	507.956	8.83369	513.719	-13.212	508.78	-39.3357	507.956	32.4369	507.956	-44.7348
508.301	-4.51598	549.365	8.9581	550.183	15.0966	550.183	-2.40787	551.821	-10.5818	549.842	-13.6934	517.832	-99.7751	508.678	0.406053	511.971	-6.16934	514.541	-4.88694	508.78	7.92479	514.541	-14.8164	509.603	1.01915	508.78	61.7725	508.78	-73.0004
509.125	-3.67076	550.183	8.72172	551.002	8.14717	551.002	-13.1672	552.641	-13.465	551.479	46.3472	518.654	-104.515	509.503	4.71923	512.796	-0.340257	515.365	-5.40812	509.603	3.41433	515.365	-14.1633	510.427	-23.7802	509.603	103.212	509.603	-75.3576
509.948	-3.02889	551.002	-20.3073	551.821	-0.653891	551.821	-6.28722	553.459	-22.877	552.298	56.7397	519.477	-97.3613	510.325	14.5592	513.618	1.01581	516.187	-4.84964	510.427	-3.54709	516.187	-15.931	511.249	18.452	510.427	81.5967	510.427	-51.6823
510.772	-3.9476	551.821	-6.17797	552.641	-3.87197	552.641	2.76749	554.278	14.2511	553.116	60.6237	520.299	-87.935	511.149	18.2498	514.441	5.49628	517.011	-3.27406	511.249	-11.8753	517.011	-11.8879	512.073	24.853	511.249	35.2649	511.249	-24.0991
511.594	-4.09949	552.641	10.1319	553.459	1.49928	553.459	8.37858	555.096	16.8071	553.937	37.3031	521.122	-71.2234	511.971	12.1274	515.263	4.51027	517.832	0.070221	512.073	-17.0206	517.832	-10.7414	512.896	-4.38057	512.073	8.84216	512.073	-21.8763
512.418	-3.15628	553.459	20.5351	554.278	14.465	554.278	10.9807	555.914	2.5819	554.755	10.0374	521.943	-62.6978	512.796	7.74658	516.087	9.3459	518.654	1.13231	512.896	-19.2775	518.654	-3.15923	513.719	8.54658	512.896	18.4007	512.896	-20.7908
513.24	-0.895846	554.278	20.162	555.096	26.604	555.096	9.12057	556.732	6.69365	555.573	-18.843	522.765	-59.2032	513.618	-5.49525	516.909	11.3502	519.477	-0.0427909	513.719	-17.121	519.477	-2.26825	514.541	-16.2707	513.719	28.9962	513.719	-1.2613
514.062	-2.347	555.096	19.9536	555.914	30.5772	555.914	7.31607	557.55	-31.5642	556.391	-27.3267	523.588	-50.5438	514.441	5.1704	517.73	13.9282	520.299	-2.28218	514.541	-18.4708	520.299	-1.81034	515.365	-19.9361	514.541	30.8061	514.541	30.6124
514.886	-1.4879	555.914	19.9536	556.732	19.1138	556.732	2.15575	558.368	-42.5438	557.209	-21.9835	524.409	-48.9071	515.263	2.25134	518.554	17.0278	521.122	-4.66092	515.365	-19.2622	521.122	-0.848377	516.187	-2.23499	515.365	27.6859	515.365	59.8187
515.708	-1.43727	556.732	19.1154	557.55	7.65052	557.55	0.889812	559.188	-51.2215	558.027	-5.59296	525.232	-53.1249	516.087	17.9881	519.375	15.7189	521.943	-6.2771	516.187	-13.8769	521.943	0.468559	517.011	-1.10855	516.187	34.4542	516.187	49.0563
516.532	-1.13349	557.55	10.4081	558.368	-3.16826	558.368	0.368804	560.006	-29.0199	558.845	-24.8854	526.053	-66.877	516.909	7.70598	520.199	11.226	522.765	-5.60561	517.011	-5.00406	522.765	5.70081	517.832	-9.4227	517.011	32.2201	517.011	8.65335
517.353	-0.334003	558.368	-0.324646	559.188	0.328502	559.188	-0.332216	560.824	-28.4198	559.663	-27.0382	526.873	-75.557	517.73	-1.43472	521.02	-2.66494	523.588	-3.01512	517.832	-1.61696	523.588	12.0441	518.654	31.8977	517.832	-20.3803	517.832	-6.50294
518.177	-0.187825	559.188	-13.9598	560.006	10.2365	560.006	-1.44887	561.642	-26.1274	560.483	-47.3127	527.696	-83.218	518.554	-11.013	521.841	12.5101	524.409	-1.25849	518.654	3.36157	524.409	13.4356	519.477	33.042	518.654	-31.3529	518.654	-4.04237
518.998	0.0424649	560.006	-4.44814	560.824	7.70968	560.824	-7.78293	562.459	-22.8912	561.301	-66.6384	528.517	-78.8484	519.375	-6.97959	522.665	11.9885	525.232	-1.62386	519.477	7.31886	525.232	15.5832	520.299	-22.0459	519.477	-28.6663	519.477	35.2234
519.82	0.24989	560.824	0.760738	561.642	4.79209	561.642	-5.54376	563.277	-19.7279	562.118	-20.5741	529.337	-81.9493	520.199	-2.49497	523.486	7.14044	526.053	-1.30787	520.299	9.1707	526.053	13.2581	521.122	-64.6	520.299	5.49571	520.299	74.1583
520.643	-0.569193	561.642	-6.4057	562.459	1.72036	562.459	1.97573	564.094	-4.23649	562.936	-17.6833	530.16	-83.5885	521.02	0.333865	524.309	10.5679	526.873	-4.09915	521.122	7.56906	526.873	8.50506	521.943	-83.2487	521.122	46.8125	521.122	48.6945
521.465	-0.236823	562.459	-30.352	563.277	4.33281	563.277	13.8477	564.911	18.4923	563.753	-27.6153	530.98	-82.6338	521.841	7.84584	525.13	10.5455	527.696	-5.90076	521.943	9.24559	527.696	7.88742	522.765	-87.4505	521.943	67.174	521.943	24.9365
522.288	0.040015	563.277	-23.7282	564.094	6.21041	564.094	12.4822	565.729	24.4916	564.571	-25.5956	531.801	-69.5945	522.665	17.4287	525.951	8.07925	528.517	-3.57908	522.765	5.74615	528.517	6.84736	523.588	-35.2591	522.765	41.6373	522.765	-47.5159
523.109	0.144544	564.094	-28.4477	564.911	-0.577604	564.911	19.6388	566.546	30.5004	565.388	-14.737	532.623	-65.2609	523.486	23.6097	526.774	3.7478	529.337	1.12134	523.588	6.13422	529.337	4.46906	524.409	17.5759	523.588	21.8886	523.588	-40.0825
523.93	-0.39035	564.911	-34.5045	565.729	2.51748	565.729	23.0707	567.363	30.5851	566.205	-1.15965	533.443	-63.9202	524.309	22.6262	527.594	0.0422217	530.16	6.32538	524.409	3.639	530.16	1.76065	525.232	0.232438	524.409	-32.9743	524.409	-59.0434
524.753	-0.743136	565.729	-47.0882	566.546	1.51796	566.546	18.4973	568.18	16.8871	567.023	0.760155	534.263	-66.5733	525.13	18.5837	528.415	-0.322872	530.98	9.37231	525.232	-1.18463	530.98	0.436612	526.053	37.8696	525.232	-60.8959	525.232	-17.193
525.574	-1.12614	566.546	-34.9261	567.363	-7.32513	567.363	15.9566	568.997	-0.943795	567.84	-2.24162	535.085	-64.826	525.951	14.9427	529.238	-1.07293	531.801	6.5525	526.053	-5.58106	531.801	0.149087	526.873	16.0919	526.053	-56.6728	526.053	-25.6085
526.395	-1.71656	567.363	-25.6664	568.18	-9.96405	568.18	8.7225	569.814	-10.5206	568.657	-9.77104	535.905	-60.3612	526.774	7.47588	530.058	-3.97629	532.623	3.52093	526.873	-0.0799968	532.623	1.57606	527.696	3.34354	526.873	-35.2272	526.873	-36.5984
527.218	-2.20654	568.18	-21.1359	568.997	-16.3846	568.997	0.0629308	570.631	-14.164	569.474	-2.69106	536.725	-40.3377	527.594	-1.43472	530.879	-3.30323	533.443	-1.51304	527.696	-1.88588	533.443	6.10547	528.517	39.4967	527.696	-63.0828	527.696	-25.5155
528.038	-1.12532	568.997	-20.1135	569.814	-17.1086	569.814	-0.59272	571.448	-6.31472	570.291	-0.11652	537.545	-25.4147	528.415	-5.21552	531.701	1.78821	534.263	-8.05238	528.517	-2.60245	534.263	8.95233	529.337	46.5235	528.517	-48.4528	528.517	-15.2803
528.859	0.197625	569.814	-34.1363	570.631	-10.21	570.631	-1.20739	572.265	-15.329	571.107	3.80077	538.367	-7.94403	529.238	-0.663219	532.521	1.98691	535.085	-6.61285	529.337	-5.10448	535.085	13.5208	530.16	-7.11619	529.337	-18.0425	529.337	-51.8167
529.681	1.78598	570.631	-39.3306	571.448	-5.6546	571.448	2.29917	573.081	-21.1165	571.924	11.5022	539.187	19.1923	530.058	1.80919	533.341	-7.59246	535.905	-1.81368	530.16	-7.47545	535.905	18.5152	530.98	-10.0843	530.16	-11.8398	530.16	-70.6225
530.502	2.52829	571.448	-57.7337	572.265	-1.28754	572.265	0.431734	573.898	-19.4949	572.741	-30.1676	540.006	19.1099	530.879	-10.228	534.164	-16.0169	536.725	7.82087	530.98	-3.58794	536.725	23.3641	531.801	11.8186	530.98	-55.7018	530.98	-37.3738
531.322	2.99704	572.265	-45.8139	573.081	-0.151018	573.081	-1.45034	574.714	-14.1852	573.557	-16.1131	540.826	15.4531	531.701	-25.3377	534.984	-9.68865	537.545	14.8452	531.801	-2.41693	537.545	22.7464	532.623	-37.6908	531.801	-68.7482	531.801	-9.47009
532.145	2.35027	573.081	-40.4548	573.898	-4.40442	573.898	-1.34057	575.531	-0.929674	574.374	-26.4501	541.647	1.59807	532.521	-33.9144	535.804	-4.13028	538.367	17.1438	532.623	-6.42357	538.367	20.1978	533.443	-7.24135	532.623	-87.7711	532.623	0.599635
532.965	1.48627	573.898	-42.5432	574.714	-1.46658	574.714	7.96001	576.347	0.72491	575.19	-47.5124	542.467	-11.0758	533.341	-32.3263	536.626	0.976067	539.187	15.4991	533.443	-1.94545	539.187	12.3458	534.263	5.20304	533.443	-41.0152	533.443	0.827082
533.785	0.901562	574.714	-35.4155	575.531	-12.617	575.531	13.0398	577.163	-1.18386	576.007	-62.4048	543.286	-30.739	534.164	-24.2098	537.445	-0.166403	540.006	9.63893	534.263	5.37681	540.006	6.17292	535.085	18.756	534.263	1.57424	534.263	19.0849
534.607	0.56756	575.531	-27.3914	576.347	-18.1424	576.347	7.77561	577.98	5.05319	576.823	-60.3796	544.105	-39.0433	534.984	-14.645	538.265	-4.02845	540.826	6.09497	535.085	27.2721	540.826	6.55628	535.905	23.673	535.085	52.9398	535.085	58.7642
535.427	-0.086563	576.347	-19.5902	577.163	-23.7222	577.163	-2.9036	578.796	-6.90077	577.639	-37.525	544.927	-29.8975	535.804	-6.90741	539.085	-4.99707	541.647	3.63942	535.905	35.2973	541.647	9.8788	536.725	40.194	535.905	50.1213	535.905	96.045
536.247	-0.208241	577.163	-25.492	577.98	-26.5978	577.98	4.62907	579.612	-19.8974	578.456	-16.568	545.746	-5.64085	536.626	7.70598	539.907	-5.77196	542.467	2.58391	536.725	38.9959	542.467	18.4052	537.545	-2.12771	536.725	55.0891	536.725	85.479
537.069	-0.00571643	577.98	-25.647	578.796	-22.6059	578.796	4.63054	580.428	-14.976	579.272	-3.09056	546.565	5.65886	537.445	-1.03318	540.726	-5.0989	543.286	1.66446	537.545	32.6523	543.286	26.2784	538.367	-26.8198	537.545	25.6121	537.545	62.3103
537.889	0.260506	578.796	-33.4967	579.612	-10.7752	579.612	0.620527	581.244	4.0482	580.088	-20.6851	547.384	-0.0231604	538.265	-13.1335	541.546	-1.29397	544.105	-0.224927	538.367	23.965	544.105	29.1323	539.187	-26.9092	538.367	-12.528	538.367	66.9317
538.709	1.70595	579.612	-35.5996	580.428	-6.6728	580.428	-3.24898	582.06	28.3374	580.904	-19.2702	548.202	-7.84109	539.085	-20.3929	542.365	1.25672	544.927	-0.0866791	539.187	13.8582	544.927	29.8245	540.006	-13.696	539.187	-61.5369	539.187	33.8897
539.528	2.6859	580.428	-40.198	581.244	0.904549	581.244	3.58852	582.875	41.0092	581.72	-13.8104	549.023	-0.790028	539.907	-22.7615	543.186	2.1235	545.746	-0.87118	540.006	7.30865	545.746	23.6481	540.826	-12.0332	540.006	-51.507	540.006	-7.54713
540.35	3.46987	581.244	-26.1897	582.06	5.71843	582.06	10.5563	583.691	17.0754	582.535	-26.733	549.842	-26.7323	540.726	-24.6339	544.006	3.09709	546.565	0.0888735	540.826	1.80078	546.565	20.6699	541.647	12.1047	540.826	-50.0364	540.826	-16.1591
541.169	3.5744	582.06	-23.1129	582.875	7.03711	582.875	11.6993	584.507	10.8454	583.351	2.82977	551.479	-20.2382	541.546	-18.6017	544.825	-2.67735	547.384	2.66511	541.647	-3.85517	547.384	22.6328	542.467	-12.5159	541.647	-41.8353	541.647	-18.3716
541.989	3.24938	582.875	-32.8522	583.691	-10.9838	583.691	-0.891276	585.32	-21.6414	584.167	20.3078	552.298	0	542.365	-13.7652	545.644	1.08783	548.202	4.24398	542.467	-0.563382	548.202	23.6232	543.286	-42.4111	542.467	1.35743	542.467	-49.2528
542.808	4.25629	583.691	-34.9649	584.507	-21.6858	584.507	-5.835	586.136	1.28036	584.982	-0.144263	553.116	8.46636	543.186	-6.41563	546.463	-0.678031	549.023	6.49215	543.286	7.6831	549.023	24.8408	544.105	-50.8504	543.286	31.4849	543.286	-59.0123
543.628	4.36735	584.507	-33.1963	585.32	-23.0995	585.32	-5.12959	586.951	13.2885	585.798	-5.34883	553.937	-13.4779	544.006	-3.36573	547.284	-1.84037	549.842	9.02889	544.105	0.444238	549.842	22.4625	544.927	0.679435	544.105	41.5242	544.105	-65.0811
544.449	4.026	585.32	-40.8376	586.136	-33.8264	586.136	1.58205	587.766	5.15439	586.613	-4.02827	554.755	-56.9613	544.825	0.126327	548.103	0.439603	555.573	3.94857	544.927	7.37332	551.479	0.599878	545.746	52.388	544.927	24.9994	544.927	-59.8808
545.268	3.75324	586.136	-36.7577	586.951	-22.9874	586.951	2.61821	588.582	-8.27292	587.427	-3.57328	555.573	-55.2553	545.644	-0.739918	548.922	1.02574	556.391	0.703073	545.746	7.55374	552.298	-34.7179	546.565	88.4697	545.746	-35.9625	545.746	-66.7145
546.087	3.16037	586.951	-23.4472	587.766	-9.3304	587.766	6.47455	589.397	-6.07701	588.242	-2.49686	556.391	-56.0657	546.463	-6.75401	549.74	7.42606	557.209	-4.467	546.565	11.6778	553.116	-8.99817	547.384	110.265	546.565	-36.0945	546.565	-73.9308
546.906	3.03951	587.766	-15.5152	588.582	9.86752	588.582	3.00165	590.212	-3.65515	589.057	-1.39269	557.209	-23.9063	547.284	-4.92226	551.38	10.1445	558.027	-2.23705	547.384	16.6257	553.937	31.2936	548.202	50.9219	547.384	-40.3459	547.384	-89.3663
547.725	3.62095	588.582	-13.4171	589.397	20.2192	589.397	-0.490275	591.027	-26.4757	589.872	-2.45802	558.027	-5.09688	548.103	-0.0270702	552.198	10.1783	558.845	-0.816701	548.202	18.5048	554.755	26.0197	549.023	19.3103	548.202	-14.9412	548.202	-70.7879
548.546	4.42288	589.397	-6.91932	590.212	21.91	590.212	-8.68884	591.84	3.96818	590.687	-15.475	558.845	-8.10382	548.922	0.757965	553.017	0.262503	559.663	0.561038	549.023	18.1491	555.573	-32.9933	549.842	-23.8339	549.023	2.34722	549.023	-21.2353
549.365	5.05414	590.212	-12.9083	591.027	-1.30778	591.027	-11.7124	592.655	16.6353	591.502	-7.2076	559.663	3.09225	549.74	1.1189	553.835	-7.78195	560.483	-2.18024	549.842	21.2604	556.391	15.6218	550.661	-14.8582	549.842	18.7118	549.842	33.0833
550.183	5.27871	591.027	-22.9917	591.84	-0.414131	591.84	-6.5287	593.47	7.7363	592.317	-5.18237	560.483	28.6193	551.38	-4.9665	554.653	-7.1892	561.301	0	554.755	-50.6172	557.209	63.587	551.479	-64.3676	550.661	21.6435	550.661	85.4893
551.002	2.6872	591.84	-28.8305	592.655	6.41903	592.655	-0.992258	594.285	-12.8013	593.13	5.71503	561.301	-13.1367	552.198	4.312	555.472	-6.07144	562.118	0	555.573	-105.706	558.027	-1.59967	552.298	-51.6013	551.479	29.4204	551.479	149.423
551.821	-1.84759	592.655	-30.7154	593.47	6.54981	593.47	0.301482	595.099	-16.2752	593.945	4.63861	562.118	13.4566	553.017	-2.31	556.29	-0.652024	562.936	0	556.391	-84.1418	558.845	0	553.116	1.01915	552.298	41.939	552.298	160.268
552.641	-5.10053	593.47	-27.3817	594.285	13.534	594.285	6.24039	595.914	-4.799	594.76	6.25879	562.936	-0.703753	553.835	2.464	557.11	1.17703	563.753	0	557.209	-110.552	559.663	5.77382	553.937	28.733	553.116	31.2398	553.116	127.795
553.459	-1.5782	594.285	-10.471	595.099	15.1812	595.099	5.61548	596.726	-8.36942	595.574	1.80329	563.753	35.6995	554.653	13.09	557.928	-1.00767	564.571	0	558.027	-135.332	560.483	-10.4979	554.755	-17.0395	553.937	19.7676	553.937	36.8672
554.278	-1.42554	595.099	0.440937	595.914	20.5711	595.914	4.66566	597.541	-11.9469	596.389	4.32789	564.571	13.158	555.472	-6.6605	558.746	1.04154	565.388	0	558.845	-180.883	561.301	-43.2412	555.573	-48.4902	554.755	-19.6262	554.755	-38.1078
555.096	0.720629	595.914	9.65216	596.726	20.9697	596.726	2.62699	598.355	-18.4734	597.203	-5.00482	565.388	-11.7719	556.29	-0.6545	559.564	11.1437	566.205	0	559.663	-196.081	562.118	-19.696	556.391	-49.7776	555.573	-19.136	555.573	-56.2933
555.914	2.64455	596.726	11.0767	597.541	15.1189	597.541	5.66084	599.169	-11.4432	598.016	-21.7227	566.205	47.7272	557.11	4.5045	560.382	1.10929	567.023	0	560.483	-172.733	562.936	17.9963	557.209	-30.6998	556.391	-0.461904	556.391	-46.6888
556.732	2.52557	597.541	5.3397	598.355	7.53687	598.355	3.17288	599.984	-15.4161	598.83	-33.3469	567.023	9.51133	557.928	-11.1265	561.199	-8.23921	567.84	0	561.301	-97.7322	563.753	-4.64905	558.027	-9.94121	557.209	27.7991	557.209	-38.0044
557.55	4.40459	598.355	-7.27789	599.169	3.57772	599.169	-3.84171	600.796	-19.2054	599.644	-36.038	567.84	-1.91933	558.746	0.0385	562.017	5.83434	568.657	0	562.118	-47.3793	564.571	2.9494	558.845	-24.71	558.027	45.1346	558.027	56.2209
558.368	5.31604	599.169	-23.9075	599.984	-2.51904	599.984	-4.46516	601.61	-34.911	600.458	-33.6133	568.657	-17.7005	559.564	42.0035	562.834	-23.8624	569.474	0	562.936	-41.2118	565.388	-2.54948	559.663	-7.00891	558.845	68.9745	558.845	108.544
559.188	2.64904	599.984	-47.1851	600.796	-8.13471	600.796	-9.72208	602.424	-59.8004	601.273	-9.29941	569.474	0	560.382	-1.3475	563.652	-8.56099	570.291	0	563.753	-93.9436	566.205	-32.5184	560.483	-38.3702	559.663	69.6438	559.663	122.687
560.006	-0.563482	600.796	-33.5548	601.61	-12.3025	601.61	-16.2844	603.238	-45.361	602.085	12.2069	570.291	6.20582	561.199	-51.0895	564.469	1.54115	571.107	0	564.571	-146.301	567.023	-39.9918	561.301	-80.4416	560.483	43.994	560.483	98.8467
560.824	-2.7119	601.61	-5.27186	602.424	-10.6444	602.424	-23.0912	604.05	-15.9998	602.899	23.3429	571.107	0	562.017	-2.4255	565.289	5.53797	571.924	0	565.388	-148.57	567.84	0.424913	562.118	-30.9501	561.301	22.6804	561.301	68.5755
561.642	-4.40684	602.424	28.9953	603.238	-1.85736	603.238	-19.7222	604.864	-8.20231	603.713	13.8104	571.924	21.1979	562.834	13.86	566.106	0	572.741	0	566.205	-105.111	568.657	10.6228	562.936	-6.86587	562.118	33.8321	562.118	24.0371
562.459	-3.91968	603.238	43.2409	604.05	5.50669	604.05	-18.787	605.677	-16.72	604.526	-2.07517	572.741	7.42139	563.652	-27.489	566.923	-10.7203	573.557	0	567.023	-74.6703	569.474	-10.2729	563.753	9.29754	562.936	5.36374	562.936	-47.4745
563.277	-1.35819	604.05	39.2725	604.864	7.53064	604.864	-7.92343	606.491	-40.1548	605.338	-4.13924	573.557	11.2387	564.469	4.928	567.74	-8.90817	574.374	0	567.84	-15.9473	570.291	6.89859	564.571	5.54276	563.753	0.0094266	563.753	-59.002
564.094	-1.51759	604.864	26.0686	605.677	15.7479	605.677	0.636625	607.303	-50.2165	606.152	-21.3842	574.374	-4.49975	565.289	0	568.557	0	575.19	0	568.657	10.9252	571.107	36.5425	565.388	-27.4099	564.571	20.3426	564.571	-37.2497
564.911	-2.20903	605.677	8.51348	606.491	15.6778	606.491	2.62699	608.116	-49.7505	606.965	-34.2514	575.19	1.85535	566.106	-0.5775	569.374	-1.58349	576.007	0	569.474	-3.17184	571.924	8.44828	566.205	-17.862	565.388	33.4833	565.388	-11.8583
565.729	-4.19357	606.491	0.784965	607.303	3.71005	607.303	2.24941	608.93	-46.1048	607.779	-40.2216	576.007	18.8947	566.923	13.475	570.191	4.86054	576.823	0	570.291	-0.110133	572.741	12.0725	567.023	-29.1263	566.205	22.8689	566.205	14.4533
566.546	-6.33525	607.303	-18.374	608.116	-6.96238	608.116	-13.2316	609.743	-36.5397	608.59	-30.4894	576.823	3.49744	567.74	-8.778	571.008	4.43715	577.639	0	571.107	-36.6083	573.557	0.774842	567.84	-3.39718	567.023	-3.20505	567.023	10.0284
567.363	-8.22999	608.116	-26.7082	608.93	-5.67951	608.93	-17.7904	610.554	-41.5905	609.404	11.2858	577.639	-38.1733	568.557	22.946	571.825	2.52342	578.456	0	571.924	-105.133	574.374	-1.29973	568.657	-12.355	567.84	-23.048	567.84	-0.547942
568.18	-8.13345	608.93	-31.5391	609.743	-0.951255	609.743	-28.0759	611.367	-19.4996	610.217	-10.448	578.456	-51.9284	569.374	0	572.642	25.9031	579.272	0	572.741	-149.032	575.19	-2.69945	569.474	-0.911874	568.657	-37.3953	568.657	-44.8485
568.997	-9.31654	609.743	-10.9314	610.554	7.4419	610.554	-12.0271	612.181	-25.9508	611.03	-22.5272	579.272	-2.87899	570.191	9.394	573.458	55.5067	580.088	0	573.557	-182.226	576.007	-30.0939	570.291	54.9985	569.474	-40.4684	569.474	8.50861
569.814	-10.6927	610.554	5.20403	611.367	16.626	611.367	-0.256114	612.992	-17.3767	611.842	-22.6271	580.088	-2.94297	571.008	-23.6005	574.275	54.7615	580.904	11.4196	574.374	-165.883	576.823	-54.8138	571.107	29.1442	570.291	-44.7481	570.291	58.8469
570.631	-9.15715	611.367	16.2808	612.181	20.6598	612.181	9.61231	613.805	-5.31209	612.655	-36.3987	580.904	6.9309	571.825	20.636	575.091	0.474199	581.72	14.8213	575.19	-126.873	577.639	-21.7956	571.924	-18.2732	571.107	-26.5076	571.107	102.072
571.448	-4.92991	612.181	15.5297	612.992	25.1203	612.992	15.9859	614.617	0.223592	613.468	-41.4201	581.72	-16.1863	572.642	-0.1925	575.908	-3.94602	582.535	-32.0573	576.007	-45.7934	578.456	15.3969	572.741	22.2962	571.924	-9.97335	571.924	70.8189
572.265	-0.66675	612.992	3.69224	613.805	35.2883	613.805	11.0744	615.428	15.9457	614.279	-48.2671	582.535	-84.3011	573.458	-3.157	576.724	0	583.351	-15.6167	576.823	3.85466	579.272	25.8447	573.557	34.8658	572.741	2.72429	572.741	12.4579
573.081	-0.224495	613.805	-2.6747	614.617	31.7293	614.617	1.66986	616.241	32.3691	615.092	-39.1951	583.351	0.917011	574.275	17.094	577.54	-5.69039	584.167	1.6121	577.639	73.8113	580.088	-12.6974	574.374	76.651	573.557	31.2775	573.557	12.6337
573.898	-0.511849	614.617	-3.00903	615.428	20.965	615.428	3.70414	617.054	34.8004	615.904	-41.8418	584.167	0.703753	575.091	-6.1215	578.356	-13.7857	584.982	17.2644	578.456	174.099	580.904	-52.1394	575.19	86.4671	574.374	53.7505	574.374	-43.9491
574.714	-0.309803	615.428	13.9016	616.241	7.05579	616.241	0.569304	617.865	48.3783	616.715	-40.4103	584.982	27.7236	575.908	4.3505	579.172	-38.3678	585.798	18.1592	579.272	215.883	581.72	-13.5972	576.007	1.64495	575.19	66.3162	575.19	-22.0624
575.531	-1.71739	616.241	26.0783	617.054	-2.98766	617.054	-2.59187	618.677	56.3335	617.528	-15.8245	585.798	-65.4277	576.724	-2.0405	579.989	-8.25615	586.613	-8.04628	580.088	182.491	582.535	23.9201	576.823	2.16347	576.007	70.8598	576.007	30.0024
576.347	-0.931654	617.054	34.6257	617.865	-2.92071	617.865	-11.9203	619.49	59.8098	618.34	6.65829	586.613	-6.33378	577.54	6.622	580.804	-3.77666	587.427	-16.3482	580.904	133.592	583.351	11.7476	577.639	29.7879	576.823	79.636	576.823	35.0683
577.163	-2.65129	617.865	39.539	618.677	0.175928	618.677	-5.90671	620.3	61.5609	619.151	0.0443886	587.427	-14.9921	578.356	64.1025	581.618	-4.86901	588.242	-21.1561	581.72	106.829	584.167	8.92318	578.456	-2.98594	577.639	84.5095	577.639	58.2473
577.98	-5.86156	618.677	40.697	619.49	1.20036	619.49	-6.03989	621.112	56.1123	619.963	7.21315	588.242	-32.8205	579.172	56.6335	582.434	-2.59963	589.057	-8.9482	582.535	118.415	584.982	-40.8417	579.272	39.9973	578.456	102.279	578.456	58.2059
578.796	-9.28062	619.49	42.9211	620.3	0.406346	620.3	2.49821	621.923	30.1591	620.776	12.5842	589.057	0.76773	579.989	46.2	583.25	-14.0905	589.872	3.30941	583.351	123.041	585.798	0	580.088	22.5287	579.272	133.066	579.272	46.9059
579.612	-8.40285	620.3	39.0835	621.112	4.65508	621.112	6.59895	622.735	2.74195	621.586	0.0554858	589.872	130.834	580.804	10.78	584.066	13.7348	590.687	2.443	584.167	184.055	586.613	21.1457	580.904	-0.321838	580.088	150.043	580.088	17.9374
580.428	-6.5575	621.112	35.2507	621.923	5.14705	621.923	12.3022	623.547	-28.5539	622.398	-20.6241	590.687	81.4861	581.618	1.848	584.881	0	591.502	-7.00943	584.982	120.618	587.427	41.1166	581.72	7.86715	580.904	144.548	580.904	-31.8944
581.244	-0.590422	621.923	21.9451	622.735	4.63951	622.735	22.6624	624.357	-59.3155	623.208	-30.9721	591.502	7.42139	582.434	-5.8135	585.697	0	592.317	-23.1659	585.798	71.8289	588.242	-27.9943	582.535	31.8798	581.72	127.994	581.72	-67.035
582.06	6.23423	622.735	16.6006	623.547	4.79831	623.547	24.0527	625.169	-46.6131	624.02	-13.3943	592.317	-63.6363	583.25	-60.4065	586.512	6.85049	593.13	-24.5863	586.613	78.7012	589.057	-0.349929	583.351	8.7075	582.535	106.228	582.535	-93.9876
582.875	5.68197	623.547	16.8235	624.357	4.2176	624.357	28.1901	625.979	-22.6558	624.832	15.9799	593.13	-5.43809	584.066	-0.3465	587.327	0	593.945	-25.8078	587.427	87.0493	589.872	0.574883	584.167	34.24	583.351	98.4232	583.351	-59.2501
583.691	1.49738	624.357	8.69761	625.169	4.82322	625.169	23.1117	626.791	-4.19412	625.642	25.7842	593.945	32.6072	584.881	-29.26	588.143	15.0812	594.76	-3.78523	588.242	156.653	590.687	-40.9916	584.982	31.0931	584.167	96.4436	584.167	-10.6177
584.507	-2.42679	625.169	-6.93386	625.979	-1.71257	625.979	12.3857	627.602	30.9193	626.454	18.1605	594.76	-3.64672	585.697	-46.3925	588.958	0	595.574	2.30097	589.057	160.993	591.502	-13.5222	585.798	12.1404	584.982	90.2032	584.982	35.4095
585.32	-1.06635	625.979	-15.0161	626.791	0.591615	626.791	2.80115	628.412	33.1976	627.264	5.27115	595.574	-8.85023	586.512	6.776	589.771	-9.41624	596.389	-3.96278	589.872	77.7981	592.317	12.7474	586.613	3.48658	585.798	76.4592	585.798	36.9086
586.136	-0.161636	626.791	-13.5721	627.602	-0.57916	627.602	-1.50448	629.224	32.1196	628.076	2.86861	596.389	5.20351	587.327	31.6085	590.586	-26.8685	597.203	-7.62018	590.687	-11.9384	593.13	0.624873	587.427	-1.66283	586.613	82.5017	586.613	57.6373
586.951	0.572462	627.602	4.78732	628.412	2.68095	628.412	-4.04952	630.033	9.74392	628.887	0.0998744	597.203	-43.5687	588.143	36.8445	591.401	-26.9785	598.016	-1.01555	591.502	-111.499	593.945	-6.47368	588.242	-48.6512	587.427	88.8646	587.427	60.4701
587.766	-0.491644	628.412	16.2953	629.224	0.722394	629.224	-11.5617	630.845	-1.64988	629.697	-3.45121	598.016	51.8005	588.958	3.5805	592.216	-0.601217	598.83	-30.4452	592.317	-173.482	594.76	-7.3735	589.057	3.07534	588.242	60.745	588.242	59.5189
588.582	0.0830631	629.224	21.3249	630.033	0.650777	630.033	-21.1945	631.654	-21.5496	630.509	-1.94755	598.83	16.0584	589.771	2.772	593.031	19.366	599.644	-25.1118	593.13	-281.544	595.574	-18.3713	589.872	-7.43803	589.057	56.0977	589.057	53.4399
589.397	-0.148167	630.033	35.7304	630.845	6.97016	630.845	-26.8744	632.466	15.2914	631.318	-1.30946	599.644	-25.3778	590.586	5.082	593.846	38.4017	600.458	-40.2456	593.945	-228.02	596.389	-0.849827	590.687	-1.30523	589.872	88.0256	589.872	56.4277
590.212	-3.07334	630.845	44.9078	631.654	8.96765	631.654	-27.7861	633.275	2.37008	632.129	-37.8801	600.458	-1.25822	591.401	-0.231	594.661	39.0537	601.273	-21.497	594.76	-159.429	597.203	26.8695	591.502	2.82502	590.687	83.7837	590.687	38.0148
591.027	-5.19257	631.654	37.2955	632.466	14.8947	632.466	-12.1252	634.086	0.440124	632.939	-34.9949	601.273	14.3096	592.216	18.2875	595.473	2.49801	602.085	12.4281	595.574	-61.3662	598.016	0	592.317	11.4252	591.502	74.0931	591.502	-5.33468
591.84	-0.121227	632.466	21.3491	633.275	16.271	633.275	0.923473	634.895	-19.4784	633.75	-36.7038	602.085	-10.7269	593.031	1.54	596.288	-2.71818	602.899	20.3962	596.389	34.4937	598.83	0.424913	593.13	9.49422	592.317	92.0225	592.317	-40.2582
592.655	-0.386131	633.275	-1.58447	634.086	6.76933	634.086	0.684921	635.706	-30.3262	634.559	-23.6924	602.899	-1.42883	593.846	11.396	597.102	-8.34083	603.713	1.50557	597.203	105.265	599.644	-0.724852	593.945	-19.4176	593.13	129.861	593.13	-80.7129
593.47	-4.9097	634.086	-4.02658	634.895	1.27509	634.895	7.35705	636.515	-22.2416	635.37	12.6508	603.713	0.61845	594.661	-10.164	597.917	0	604.526	-12.2931	598.016	120.398	600.458	0	594.76	-32.7202	593.945	149.082	593.945	-16.49
594.285	-4.38214	634.895	-8.87204	635.706	-1.37006	635.706	4.64956	637.326	-42.5532	636.179	38.9066	604.526	-1.59944	595.473	3.1185	598.731	6.85049	605.338	-25.7651	598.83	13.5244	601.273	-1.74964	595.574	-46.0765	594.76	156.84	594.76	27.5108
595.099	-2.72537	635.706	-13.8968	636.515	-1.45413	636.515	-0.674677	638.135	-53.5492	636.99	39.528	605.338	-13.5206	596.288	15.5925	599.543	16.1312	606.152	-8.5363	599.644	6.71812	602.085	-44.316	596.389	-48.526	595.574	146.848	595.574	40.7442
595.914	-2.59741	636.515	-18.248	637.326	0.104311	637.326	-2.62846	638.946	-51.0968	637.799	37.8191	606.152	-15.056	597.102	0	600.357	35.0315	606.965	-4.16162	600.458	-16.2777	602.899	2.04958	597.203	-35.277	596.389	132.02	596.389	78.7486
596.726	-3.19905	637.326	-30.1146	638.135	3.54969	638.135	-1.03763	639.754	-40.1596	638.61	65.7173	606.965	9.12746	597.917	25.1405	601.172	7.53638	607.779	0.0355087	601.273	-1.25552	603.713	-14.9719	598.016	-16.0025	597.203	111.479	597.203	71.8114
597.541	-5.80095	638.135	-28.8111	638.946	1.98503	638.946	0.683458	640.565	-25.0965	639.418	87.8062	607.779	31.5409	598.731	25.8335	601.986	-18.7732	608.59	11.6611	602.085	-5.24234	604.526	26.9945	598.83	-5.00637	598.016	68.9933	598.016	4.36286
598.355	-8.69245	638.946	-25.2885	639.754	16.914	639.754	-6.08819	641.373	-26.2686	640.229	90.292	608.59	-5.22483	599.543	23.7545	602.8	-39.3924	609.404	26.1557	602.899	70.4632	605.338	3.19935	599.644	-6.63344	598.83	73.5369	598.83	-74.3444
599.169	-9.09429	639.754	-19.6774	640.565	18.3712	640.565	-18.4065	642.184	-25.4825	641.037	79.1726	609.404	-19.5771	600.357	-22.715	603.612	4.01376	610.217	21.0283	603.713	96.6309	606.152	-56.1385	600.458	36.4928	599.644	103.297	599.644	-122.987
599.984	-7.40833	640.565	-17.3661	641.373	20.9665	641.373	-3.96025	642.992	0.760214	641.848	60.0356	610.217	-5.16086	601.172	-8.008	604.425	25.2511	611.03	22.3989	604.526	67.4015	606.965	-98.5799	601.273	43.8057	600.458	122.932	600.458	-118.387
600.796	-5.05787	641.373	-0.915793	642.184	29.0343	642.184	-4.51345	643.803	18.384	642.656	47.3127	611.03	28.4487	601.986	-3.003	605.239	-4.40328	611.842	22.5907	605.338	54.8023	607.779	-132.623	602.085	19.8288	601.273	116.315	601.273	-110.622
601.61	-4.52806	642.184	1.54086	642.992	28.8973	642.992	1.2191	644.611	22.3216	643.467	38.7346	611.842	22.5841	602.8	24.101	606.053	4.03916	612.655	-0.0923227	606.152	75.3972	608.59	-6.79861	602.899	26.9629	602.085	115.25	602.085	-76.2984
602.424	-6.5328	642.992	7.42325	643.803	13.7348	643.803	1.16788	645.419	1.045	644.275	29.9512	612.655	14.1817	603.612	18.5955	606.865	-20.5769	613.468	-17.8538	606.965	163.922	609.404	3.19935	603.713	42.2502	602.899	129.39	602.899	-33.1557
603.238	-7.96059	643.803	24.2564	644.611	0.801795	644.611	-3.69535	646.229	-5.57334	645.085	14.5539	613.468	-7.46405	604.425	0	607.678	-11.3723	614.279	-27.8033	607.779	233.46	610.217	-25.3198	604.526	48.5618	603.713	115.627	603.713	5.67585
604.05	-9.77227	644.611	23.108	645.419	1.47904	645.419	-8.42394	647.037	-3.63397	645.893	13.2888	614.279	1.42883	605.239	0	608.492	-2.56576	615.092	-31.2122	608.59	293.461	611.03	2.42451	605.338	44.7891	604.526	97.6691	604.526	25.2053
604.864	-11.4245	645.419	23.5247	646.229	7.62561	646.229	-3.29874	647.847	-1.89701	646.701	19.5698	615.092	44.8909	606.053	9.8175	609.305	0	615.904	-19.6931	609.404	269.584	611.842	-7.22353	606.152	5.82884	605.338	155.294	605.338	68.6478
605.677	-9.96758	646.229	31.1224	647.037	15.6498	647.037	2.46308	648.655	-5.54509	647.511	9.01643	615.904	49.3054	606.865	41.349	610.116	0	616.715	-7.86874	610.217	174.407	612.655	52.1894	606.965	6.07916	606.152	183.008	606.152	69.9298
606.491	-9.96084	647.037	26.9311	647.847	13.0405	647.847	3.89878	649.463	-12.0316	648.319	8.24518	616.715	5.18218	607.678	-49.28	610.93	-2.48955	617.528	1.605	611.03	-31.4761	613.468	0	607.779	-18.0766	606.965	194.716	606.965	63.1788
607.303	-7.78998	647.847	23.7573	648.655	7.4419	648.655	8.44151	650.272	-24.5881	649.129	24.042	617.528	-0.980989	608.492	-81.7355	611.743	10.1953	618.34	39.2159	611.842	-107.864	614.279	0	608.59	41.3562	607.779	191.85	607.779	64.3987
608.116	-3.73335	648.655	20.6853	649.463	-0.0420358	649.463	4.85152	651.08	-23.0347	649.937	14.2099	618.34	-67.1977	609.305	4.0425	612.554	1.05848	619.151	46.3531	612.655	-46.9608	615.092	0.224954	609.404	35.0982	608.59	182.358	608.59	84.9414
608.93	0.0404091	649.463	1.36642	650.272	-0.683472	650.272	3.41729	651.89	-18.6617	650.745	19.2092	619.151	8.2531	610.116	20.405	613.367	-13.955	619.963	27.711	613.468	57.7979	615.904	4.94899	610.217	3.16474	609.404	201.842	609.404	61.2041
609.743	2.45373	650.272	-13.2136	651.08	1.48682	651.08	1.6684	652.697	-7.02316	651.554	4.00052	619.963	38.6851	610.93	-12.8205	614.18	-8.70494	620.776	10.816	614.279	16.7402	616.715	7.94838	611.03	-21.2592	610.217	199.835	610.217	29.5268
610.554	1.74433	651.08	-21.257	651.89	-8.99567	651.89	-1.6523	653.505	2.57014	652.362	31.6768	620.776	0.831708	611.743	0	614.991	0.872188	621.586	-2.32227	615.092	-1.9824	617.528	31.1686	611.842	-29.5554	611.03	234.656	611.03	-2.8431
611.367	-0.0493889	651.89	-20.9809	652.697	-15.1625	652.697	-0.415636	654.314	0.181228	653.171	64.2192	621.586	-24.9939	612.554	-45.815	615.804	7.39243	622.398	-31.7306	615.904	-4.82383	618.34	30.7937	612.655	-13.0702	611.842	240.341	611.842	2.45023
612.181	-1.20329	652.697	-12.3075	653.505	-11.9055	653.505	-4.76371	655.121	-7.79043	653.979	86.3913	622.398	-18.6388	613.367	-43.6205	616.616	1.32098	623.208	-24.8064	616.715	65.1107	619.151	-1.92461	613.468	-16.8607	612.655	237.315	612.655	26.8285
612.992	-2.99476	653.505	6.68674	654.314	-4.2067	654.314	-8.03758	655.929	-38.9569	654.786	88.006	623.208	0.0639775	614.18	-1.4245	617.427	-0.482667	624.02	-0.305375	617.528	73.2386	619.963	-16.6216	614.279	-6.25796	613.468	245.29	613.468	62.2173
613.805	-3.98254	654.314	19.44	655.121	-0.213293	655.121	-1.37862	656.738	-59.911	655.595	86.7631	624.02	9.72459	614.991	4.6585	618.24	-5.63112	624.832	9.79331	618.34	33.3483	620.776	-0.949806	615.092	-4.21965	614.279	270.223	614.279	83.2872
614.617	-6.11524	655.121	20.5254	655.929	18.7059	655.929	0.566377	657.545	-61.7751	656.402	78.1239	624.832	-5.35279	615.804	-22.5225	619.052	-15.1066	625.642	11.1284	619.151	81.1021	621.586	-7.22353	615.904	-8.49294	615.092	283.383	615.092	105.267
615.428	-6.62485	655.929	3.02841	656.738	12.3445	656.738	0	658.352	-60.5841	657.21	56.3291	625.642	-2.85766	616.616	-21.5215	619.862	-17.5792	626.454	-6.1004	619.963	174.561	622.398	-16.3217	616.715	-1.16219	615.904	261.428	615.904	76.1226
616.241	-4.79072	656.738	-5.11196	657.545	0.823591	657.545	-4.94373	659.161	-86.0431	658.019	44.261	626.454	-0.298562	617.427	1.617	620.675	2.00688	627.264	2.72707	620.776	193.57	623.208	0.624873	617.528	21.7956	616.715	222.609	616.715	85.7064
617.054	-3.72213	657.545	-0.566919	658.352	-10.3813	658.352	2.44698	659.968	-57.435	658.826	47.7732	627.264	-18.0417	618.24	-38.1535	621.487	-1.96454	628.076	-0.085221	621.586	239.209	624.02	5.44889	618.34	0.0893994	617.528	187.806	617.528	53.6983
617.865	-3.03068	658.352	0.547537	659.161	-31.8974	659.161	6.84921	660.775	-36.4314	659.633	58.0658	628.076	0	619.052	-12.1275	622.297	-8.81503	628.887	-13.053	622.398	245.421	624.832	-3.29933	619.151	8.45718	618.34	183.649	618.34	26.3943
618.677	-2.7119	659.161	4.17679	659.968	-9.51411	659.968	6.02233	661.583	-28.2221	660.441	35.8937	628.887	12.6249	619.862	0	623.11	0.990738	629.697	-12.5346	623.208	250.157	625.642	28.9441	619.963	19.8288	619.151	204.369	619.151	-3.1119
619.49	-4.5999	659.968	9.97196	660.775	-9.23854	660.775	-0.957133	662.39	-11.1373	661.248	36.554	629.697	-28.8965	620.675	-18.5185	623.92	-0.397989	630.509	-3.68581	624.02	275.553	626.454	-0.599878	620.776	-0.733075	619.963	226.031	619.963	-35.9678
620.3	-1.60514	660.775	-5.24279	661.583	-4.85125	661.583	-4.67883	663.197	-23.6749	662.055	44.2277	630.509	-1.94065	621.487	-14.63	624.732	0.66896	631.318	0.177544	624.832	210.773	627.264	-6.14875	621.586	30.4494	620.776	254.094	620.776	-40.6821
621.112	-1.87229	661.583	-21.3007	662.39	-3.39712	662.39	-4.63639	664.003	-41.2563	662.863	43.9725	631.318	-17.018	622.297	32.3015	625.544	-10.3138	632.129	-22.9386	625.642	102.182	628.076	4.4241	622.398	0	621.586	261.569	621.586	-34.2205
621.923	-0.837366	662.39	-9.65216	663.197	-4.17712	663.197	3.92512	664.811	-57.7222	663.67	35.5553	632.129	-15.0347	623.11	-2.5025	626.354	-27.2749	632.939	-37.135	626.454	7.09258	628.887	-8.19833	623.208	-2.77138	622.398	269.375	622.398	-53.5949
622.735	2.88252	663.197	-3.28522	664.003	-0.0685028	664.003	-0.297092	665.618	-50.0376	664.476	30.2064	632.939	-39.3035	623.92	-4.4275	627.165	-23.9132	633.75	-25.3177	627.264	64.0975	629.697	27.7193	624.02	-25.3	623.208	275.342	623.208	-45.6343
623.547	1.28636	664.003	-3.86668	664.811	-11.1893	664.811	-5.57157	666.424	-45.1068	665.283	23.1542	633.75	-40.4338	624.732	-0.5775	627.975	1.57502	634.559	-8.96951	628.076	77.3355	630.509	32.9933	624.832	-26.3192	624.02	282.591	624.02	-34.6237
624.357	1.15166	664.811	-14.2408	665.618	-22.676	665.618	-7.2107	667.232	-41.4587	666.091	41.7586	634.559	-4.90494	625.544	-6.8145	628.787	7.51945	635.37	-1.10787	628.887	131.477	631.318	26.4196	625.642	-25.1391	624.832	277.868	624.832	0.599635
625.169	-1.3133	665.618	-28.3217	666.424	-29.3924	666.424	-11.4241	668.039	-27.443	666.897	51.2577	635.37	4.79832	626.354	0	629.598	9.26382	636.179	-3.89176	629.697	174.847	632.129	33.5182	626.454	-4.45209	625.642	254.848	625.642	-22.476
625.979	-1.51759	666.424	-37.1889	667.232	-19.3941	667.232	-13.6896	668.845	-22.7005	667.704	69.1131	636.179	-6.3551	627.165	79.7335	630.408	15.3522	636.99	-4.8789	630.509	143.239	632.939	-60.4377	627.264	-13.8033	626.454	222.883	626.454	-85.4583
626.791	-2.63557	667.232	-25.3902	668.039	-2.9176	668.039	-17.4933	669.651	-16.6212	668.51	82.7737	636.99	4.13721	627.975	1.771	631.219	6.42709	637.799	-1.6192	631.318	104.538	633.75	0	628.076	5.11365	627.264	217.34	627.264	-121.188
627.602	-2.38863	668.039	-3.48873	668.845	11.2563	668.845	-17.5387	670.457	-13.6062	669.318	88.1058	637.799	45.9572	628.787	0	632.029	0	638.61	-8.84168	632.129	123.922	634.559	15.0219	628.887	45.4507	628.076	247.882	628.076	-96.6239
628.412	-3.70192	668.845	-0.368255	669.651	26.0809	669.651	-15.2863	671.264	-21.5355	670.124	96.0126	638.61	-48.8149	629.598	66.6435	632.84	-7.1892	639.418	-21.2555	632.939	92.622	635.37	32.9433	629.697	24.567	628.887	256.234	628.887	-54.6185
629.224	-4.28112	669.651	-4.47236	670.457	35.3926	670.457	-6.40431	672.07	-18.1228	670.93	101.816	639.418	-0.447843	630.408	0	633.649	10.4747	640.229	-5.22689	633.75	94.6264	636.179	7.8484	630.509	-25.5146	629.697	237.126	629.697	1.25096
630.033	-5.18808	670.457	5.37362	671.264	36.7596	671.264	6.49065	672.876	-17.725	671.735	91.8289	640.229	-41.8626	631.219	0	634.46	0	641.037	5.85894	634.559	177.116	636.99	-5.64885	631.318	-47.4174	630.509	238.257	630.509	25.7636
630.845	-3.63682	671.264	2.61655	672.07	27.3326	672.07	11.0729	673.682	21.4602	672.543	94.176	641.037	14.7148	632.029	0	635.269	0	641.848	24.1601	635.37	165.508	637.799	19.9459	632.129	-15.6628	631.318	219.074	631.318	11.3414
631.654	-0.262659	672.07	6.93386	672.876	13.0389	672.876	18.5207	674.487	44.7397	673.349	90.1477	641.848	-0.746405	632.84	-4.774	636.08	5.68192	642.656	19.6718	636.179	112.27	638.61	40.3418	632.939	19.3103	632.129	189.051	632.129	-3.63916
632.466	-0.316538	672.876	12.7145	673.682	7.83891	673.682	24.9938	675.295	38.4155	674.155	133.349	642.656	-34.1214	633.649	-39.039	636.889	-0.0423392	643.467	0.532631	636.99	56.0578	639.418	0	633.75	-16.074	632.939	162.873	632.939	-44.5901
633.275	-1.05962	673.682	13.6981	674.487	7.89028	674.487	22.6961	676.1	58.1858	674.96	204.421	643.467	11.26	634.46	-0.231	637.7	0	644.275	-1.2215	637.799	-0.26432	640.229	-33.3682	634.559	-1.82375	633.75	144.133	633.75	-79.2965
634.086	-0.945124	674.487	21.9887	675.295	12.8941	675.295	21.4155	676.906	84.9439	675.766	260.755	644.275	-13.4779	635.269	9.702	638.509	-9.21301	645.085	-12.3428	638.61	5.83706	641.037	-48.2652	635.37	-16.6998	634.559	150.845	634.559	-111.925
634.895	-4.225	675.295	26.8148	676.1	24.3138	676.1	24.9938	677.711	112.159	676.573	284.664	645.085	-7.03753	636.08	7.084	639.32	-0.956866	645.893	-11.2421	639.418	78.3047	641.848	-8.14834	636.179	-7.36651	635.37	186.487	635.37	-116.939
635.706	-3.59865	676.1	17.0463	676.906	37.0382	676.906	37.4687	678.516	103.13	677.378	293.669	645.893	-1.06629	636.889	-13.7445	640.128	2.59963	646.701	-8.79907	640.229	51.5864	642.656	4.27413	636.99	-36.4392	636.179	229.491	636.179	-109.661
636.515	-4.0005	676.906	18.156	677.711	56.9383	677.711	55.2547	679.323	128.104	678.184	286.434	646.701	-31.0078	637.7	-35.0735	640.939	0	647.511	-11.3344	641.037	35.4629	643.467	-30.1688	637.799	49.2233	636.99	272.683	636.99	-89.8935
637.326	1.24146	677.711	17.6278	678.516	78.3346	678.516	83.3833	680.128	170.702	678.989	305.199	647.511	0.234584	638.509	-11.627	641.747	4.8182	648.319	-2.4288	641.848	-3.98682	644.275	-16.5466	638.61	21.1877	637.799	282.572	637.799	-67.5933
638.135	1.01247	678.516	24.2128	679.323	106.267	679.323	109.008	680.933	216.157	679.794	354.426	648.319	14.9494	639.32	-52.0905	642.558	15.9449	649.129	-6.85319	642.656	-8.03972	645.085	-3.34932	639.418	-11.908	638.61	273.532	638.61	-30.8088
638.946	-0.0269394	679.323	56.91	680.128	132.206	680.128	124.792	681.738	249.786	680.599	381.398	649.129	9.14879	640.128	13.09	643.366	15.1913	649.937	-9.21807	643.467	58.701	645.893	3.39931	640.229	49.9921	639.418	277.274	639.418	-37.4048
639.754	-3.65927	680.128	86.2929	680.933	167.443	680.933	146.228	682.543	302.462	681.406	385.648	649.937	49.6679	640.939	50.82	644.177	8.73881	650.745	-0.291172	644.275	78.3047	646.701	-1.04979	641.037	41.5528	640.229	296.165	640.229	-70.271
640.565	5.41706	680.933	92.3012	681.738	201.615	681.738	172.007	683.348	360.382	682.211	481.65	650.745	7.48537	641.747	-0.616	644.985	3.50569	651.554	-1.98139	645.085	-6.7842	647.511	0.424913	641.848	27.3562	641.037	299.37	641.037	-67.1488
641.373	7.58119	681.738	96.8608	682.543	212.927	682.543	202.356	684.153	413.227	683.016	585.397	651.554	-10.8335	642.558	3.2725	645.793	-1.63429	652.362	4.68715	645.893	-99.4062	648.319	-2.64946	642.656	21.7241	641.848	286.993	641.848	-65.9185
642.184	8.92817	682.543	105.263	683.348	223.732	683.348	240.593	684.957	525.774	683.82	696.829	652.362	1.72739	643.366	7.6615	646.603	0	653.171	24.5081	646.701	-99.2961	649.129	18.9461	643.467	-8.31415	642.656	260.146	642.656	-119.513
642.992	8.24795	683.348	120.172	684.153	243.383	684.153	283.525	685.764	656.844	684.625	828.835	653.171	7.97587	644.177	13.86	647.411	4.48796	653.979	23.94	647.511	-6.32165	649.937	33.9931	644.275	-69.3382	643.467	239.577	643.467	-103.82
643.803	5.92891	684.153	141.41	684.957	273.168	684.957	345.556	686.568	832.712	685.43	1022.19	653.979	2.32452	644.985	-3.388	648.221	-0.838317	654.786	6.15722	648.319	42.1149	650.745	8.37329	645.085	-56.2859	644.275	224.004	644.275	-86.6162
644.611	5.04665	684.957	172.266	685.764	332.858	685.764	454.319	687.373	1063.09	686.234	1291.24	654.786	-44.507	645.793	21.6755	649.029	11.6687	655.595	-7.10885	649.129	72.9302	651.554	-3.94919	645.893	-8.11747	645.085	220.62	645.085	-100.956
645.419	1.24146	685.764	232.006	686.568	432.611	686.568	605.359	688.177	1432.6	687.039	1655.46	655.595	-76.048	646.603	-52.1675	649.836	-8.08679	656.402	1.10787	649.937	87.5559	652.362	-4.34911	646.701	4.61301	645.893	217.896	645.893	-104.667
646.229	-1.27738	686.568	335.214	687.373	585.642	687.373	824.354	688.981	1938.37	687.845	2143.75	656.402	-73.9154	647.411	-12.2815	650.646	-3.31939	657.21	1.42035	650.745	160.486	653.171	1.4497	647.511	-5.22093	646.701	212.344	646.701	-58.3817
647.037	-4.0656	687.373	497.871	688.177	800.655	688.177	1128.88	689.786	2545.44	688.649	2753.37	657.21	-0.447843	648.221	-6.93	651.454	-0.169357	658.019	-3.09636	651.554	328.637	653.979	0	648.319	-9.6909	647.511	230.612	647.511	-23.0136
647.847	-5.99177	688.177	755.476	688.981	1109.16	688.981	1536.43	690.59	3179.03	689.454	3359.5	658.019	-19.9823	649.029	30.7615	652.263	-10.6017	658.826	8.69254	652.362	358.946	654.786	-7.59845	649.129	-24.4418	648.319	276.492	648.319	-18.568
648.655	-7.05588	688.981	1132.76	689.786	1603.99	689.786	2132.27	691.394	3698.4	690.258	3801.96	658.826	-8.87155	649.836	1.54	653.071	0	659.633	6.0933	653.171	275.113	655.595	0	649.937	-10.9604	649.129	280.555	649.129	-11.3931
649.463	-6.24321	689.786	1703.45	690.59	2351.03	690.59	2868.59	692.198	3985.58	691.062	3994.85	659.633	2.02596	650.646	0.77	653.878	-7.35856	660.441	-2.4288	653.979	233.13	656.402	30.0439	650.745	13.1417	649.937	292.611	649.937	-2.93614
650.272	-3.86131	690.59	2590.11	691.394	3209.6	691.394	3619.69	693.002	3875.45	691.866	3912.5	660.441	-0.682427	651.454	88.319	654.688	0	661.248	0.0710175	654.786	227.645	657.21	9.04816	651.554	8.27838	650.745	305.299	650.745	1.08555
651.08	-0.386131	691.394	3544.9	692.198	3990.74	692.198	3994.17	693.806	3396.58	692.67	3528.37	661.248	0.469169	652.263	-1.155	655.495	-3.42948	662.055	13.7419	655.595	196.367	658.019	18.9961	652.362	4.25541	651.554	282.506	651.554	-2.80174
651.89	0.44001	692.198	3971.22	693.002	4006.02	693.002	3659.38	694.609	2787.5	693.474	2994.09	662.055	5.48074	653.071	14.7455	656.302	0	662.863	22.5196	656.402	160.816	658.826	-42.3914	653.171	-7.20559	652.362	264.181	652.362	-44.8382
652.697	0.110003	693.002	3453.28	693.806	3263.45	693.806	2891.6	695.413	2160.53	694.278	2372.65	662.863	45.3174	653.878	-24.0625	657.111	2.51495	663.67	-0.0497122	657.21	165.376	659.633	-69.0109	653.979	-29.466	653.171	213.56	653.171	-98.4435
653.505	-3.44824	693.806	2412.45	694.609	2354.58	694.609	2112.22	696.217	1621.35	695.081	1815.65	663.67	42.2892	654.688	-7.392	657.918	12.7695	664.476	-3.93437	658.019	214.539	660.441	-44.8908	654.786	-29.1442	653.979	192.85	653.979	-135.548
654.314	-1.20329	694.609	1591.69	695.413	1618.63	695.413	1546.48	697.02	1220.36	695.885	1381.86	664.476	6.03521	655.495	20.1355	658.725	5.17385	665.283	-6.39868	658.826	296.545	661.248	0.549888	655.595	-2.27074	654.786	192.755	654.786	-154.913
655.121	-4.51908	695.413	1065.33	696.217	1142.37	696.217	1126.6	697.824	898.159	696.689	1051.73	665.283	-1.62076	656.302	60.7915	659.534	-3.85287	666.091	-11.6114	659.633	353.175	662.055	-30.7187	656.402	17.6117	655.595	188.523	655.595	-161.963
655.929	-5.25318	696.217	713.446	697.02	805.696	697.02	828.996	698.627	729.156	697.492	816.523	666.091	-49.9238	657.111	-5.544	660.341	-19.493	666.897	-6.70405	660.441	305.487	662.863	-46.1406	657.21	-72.9857	656.402	180.519	656.402	-123.825
656.738	-1.91494	697.02	492.677	697.824	586.221	697.824	605.693	699.431	580.241	698.296	662.683	666.897	1.72739	657.918	40.6175	661.148	-5.33474	667.704	18.4432	661.248	307.183	663.67	-45.3658	658.019	-57.8951	657.21	165.814	657.21	-90.7413
657.545	0.702669	697.824	348.185	698.627	448.242	698.627	438.628	700.234	481.14	699.099	524.701	667.704	85.8365	658.725	34.881	661.956	2.80286	668.51	37.3765	662.055	251.853	664.476	40.7667	658.826	3.98721	658.019	160.394	658.019	-4.66268
658.352	0.895735	698.627	251.998	699.431	343.515	699.431	341.088	701.037	414.008	699.902	423.617	668.51	88.2677	659.534	27.104	662.763	-1.41413	669.318	82.7212	662.863	260.839	665.283	108.228	659.633	41.8032	658.826	176.438	658.826	-2.93614
659.161	0.633076	699.431	195.776	700.234	282.034	700.234	289.887	701.84	378.559	700.706	346.858	669.318	29.8775	660.341	0	663.57	0	670.124	101.683	663.67	328.263	666.091	141.496	660.441	55.7495	659.633	186.788	659.633	111.449
659.968	2.06086	700.234	166.611	701.037	244.287	701.037	252.44	702.643	336.991	701.509	343.29	670.124	91.1467	661.148	0	664.378	0	670.93	108.579	664.476	362.999	666.897	202.084	661.248	63.0445	660.441	196.234	660.441	94.4425
660.775	5.23073	701.037	143.804	701.84	205.787	701.84	218.84	703.446	304.778	702.312	318.311	670.93	119.169	661.956	0	665.185	21.9148	671.735	93.0968	665.283	370.73	667.704	245.275	662.055	63.3663	661.248	162.307	661.248	84.0523
661.583	5.85034	701.84	119.46	702.643	170.077	702.643	185.47	704.249	270.549	703.115	324.936	671.735	103.75	662.763	-6.776	665.991	-1.56655	672.543	128.322	666.091	388.858	668.51	230.378	662.863	-20.0076	662.055	140.928	662.055	61.3178
662.39	3.0015	702.643	96.1243	703.446	143.132	703.446	152.29	705.052	235.984	703.918	300	672.543	73.233	663.57	-3.388	666.797	-28.5536	673.349	162.076	666.897	434.828	669.318	356.227	663.67	31.1825	662.863	161.563	662.863	26.0841
663.197	-1.65453	703.446	63.4707	704.249	113.557	704.249	122.406	705.855	204.095	704.721	257.487	673.349	79.2682	664.378	78.309	667.605	3.55649	674.155	175.491	667.704	458.242	670.124	394.195	664.476	31.2362	663.67	167.775	663.67	33.9
664.003	-4.99726	704.249	36.7771	705.052	96.9424	705.052	117.299	706.658	201.118	705.524	262.431	674.155	93.1513	665.185	14.322	668.411	-2.47261	674.96	241.623	668.51	469.916	670.93	441.81	665.283	17.4508	664.476	175.269	664.476	51.4445
664.811	-7.06935	705.052	22.3473	705.855	91.6988	705.855	110.935	707.46	174.885	706.326	248.365	674.96	131.41	665.991	40.3095	669.218	0	675.766	280.753	669.318	509.212	671.735	486.526	666.091	-5.63216	665.283	168.501	665.283	83.494
665.618	-5.81666	705.855	32.7893	706.658	98.0899	706.658	94.2601	708.263	181.044	707.129	223.125	675.766	242.944	666.797	1.6555	670.023	-3.30246	676.573	321.596	670.124	590.49	672.543	496.599	666.897	-11.1928	666.091	153.842	666.091	104.75
666.424	-3.59641	706.658	27.0328	707.46	114.489	707.46	85.0224	709.066	183.452	707.932	212.76	676.573	328.482	667.605	-0.0385	670.831	-11.9651	677.378	365.207	670.93	713.707	673.349	541.94	667.704	-13.6602	666.897	142.587	666.897	116.763
667.232	3.76478	707.46	23.2001	708.263	113.259	708.263	71.4557	709.868	177.092	708.734	203.433	677.378	397.962	668.411	28.8365	671.637	26.3773	678.184	399.36	671.735	758.135	674.155	635.52	668.51	-17.7726	667.704	132.802	667.704	116.029
668.039	6.57097	708.263	19.6387	709.066	87.352	709.066	50.1412	710.67	152.201	709.537	196.203	678.184	439.419	669.218	106.183	672.443	72.4085	678.989	423.136	672.543	817.585	674.96	755.071	669.318	-8.7969	668.51	126.769	668.51	105.66
668.845	8.14243	709.066	13.7417	709.868	88.1165	709.868	50.7778	711.471	144.822	710.339	181.488	678.989	515.488	670.023	111.265	673.249	126.713	679.794	429.173	673.349	907.916	675.766	911.639	670.124	2.53894	669.318	142.709	669.318	110.943
669.651	6.75505	709.868	7.41356	710.67	73.0489	710.67	41.8578	712.273	146.401	711.139	159.644	679.794	641.034	670.831	137.984	674.054	142.023	680.599	446.7	674.155	975.604	676.573	1159.74	670.93	1.46615	670.124	166.153	670.124	101.545
670.457	8.89674	710.67	6.75942	711.471	72.6146	711.471	30.5829	713.075	128.135	711.942	154.766	680.599	770.545	671.637	123.624	674.862	171.923	681.406	484.829	674.96	1007.74	677.378	1377.12	671.735	-27.6423	670.93	188.023	670.93	70.24
671.264	12.7199	711.471	10.4129	712.273	70.0893	712.273	14.7258	713.877	117.666	712.744	150.988	681.406	877.964	672.443	203.088	675.667	190.696	682.211	536.331	675.766	1208.23	678.184	1450.95	672.543	-3.16474	671.735	173.035	671.735	18.8885
672.07	19.7398	712.273	1.15322	713.075	53.4992	713.075	6.64432	714.679	115.762	713.546	135.463	682.211	896.645	673.249	299.068	676.473	201.882	683.016	612.526	676.573	1467.13	678.989	1547.98	673.349	-19.5606	672.543	175.816	672.543	-0.868437
672.876	25.9808	713.075	9.29844	713.877	40.2049	713.877	-1.19715	715.481	70.8906	714.348	124.676	683.016	958.618	674.054	388.85	677.278	211.12	683.82	721.481	677.378	1601.91	679.794	1562.23	674.155	14.2503	673.349	154.738	673.349	-47.2368
673.682	31.546	713.877	4.51113	714.679	23.2598	714.679	-10.9792	716.283	50.313	715.15	122.019	683.82	1086.32	674.862	494.34	678.083	226.845	684.625	885.794	678.184	1702.33	680.599	1624.29	674.96	29.9667	674.155	144.566	674.155	-81.9846
674.487	35.5914	714.679	-6.81757	715.481	20.0713	715.481	-16.3444	717.083	27.8008	715.952	124.027	684.625	1230.03	675.667	645.799	678.891	296.806	685.43	1070.76	678.989	1733.25	681.406	1667.16	675.766	-3.4687	674.96	164.485	674.96	-74.8303
675.295	38.8691	715.481	-1.91396	716.283	21.7138	716.283	-13.8404	717.884	-5.67454	716.754	110.794	685.43	1402.77	676.473	817.625	679.696	364.803	686.234	1309.55	679.794	1720.21	682.211	1805.56	676.573	18.166	675.766	193.321	675.766	-58.9193
676.1	42.1534	716.283	-6.57529	717.083	25.7975	717.083	-6.83019	718.686	1.16739	717.553	115.566	686.234	1650.66	677.278	966.966	680.501	411.114	687.039	1694.36	680.599	1844.77	683.016	1944.08	677.378	2.69986	676.573	221.619	676.573	-14.1948
676.906	45.8284	717.083	-0.251964	717.884	20.7315	717.884	-2.30063	719.488	16.2093	718.355	95.6519	687.039	1947.56	678.083	1021.52	681.306	393.67	687.845	2188.06	681.406	1998.9	683.82	2019.34	678.184	4.79181	677.378	200.777	677.378	2.57429
677.711	50.655	717.884	0.62991	718.686	22.1062	718.686	-0.965914	720.289	25.8614	719.157	86.2193	687.845	2351.88	678.891	1083.85	682.111	368.808	688.649	2754.26	682.211	2256.96	684.625	2095.37	678.989	-53.8006	678.184	251.078	678.184	20.6667
678.516	68.3924	718.686	5.75157	719.488	13.2086	719.488	3.27972	721.091	12.1776	719.958	76.587	688.649	2895.32	679.696	1094.82	682.915	415.128	689.454	3302.01	683.016	2346.19	685.43	2245.22	679.794	-11.6934	678.989	257.771	678.989	-6.55463
679.323	77.4463	719.488	15.5249	720.289	-3.44227	720.289	4.07294	721.89	18.0969	720.76	94.8418	689.454	3450.46	680.501	1196.5	683.72	474.419	690.258	3742.21	683.82	2387.22	686.234	2274.54	680.599	-0.0357598	679.794	247.26	679.794	-63.065
680.128	88.0469	720.289	9.47288	721.091	4.33436	721.091	-1.75621	722.691	9.40736	721.561	104.003	690.258	3855.71	681.306	1234.27	684.527	569.479	691.062	3964	684.625	2395.88	687.039	2282.33	681.406	-1.43039	680.599	240.812	680.599	-114.83
680.933	96.7035	721.091	0	721.89	6.37855	721.89	6.15405	723.493	-5.41094	722.36	127.046	691.062	4002.03	682.111	1364.98	685.331	728.082	691.866	3854.51	685.43	2470.86	687.845	2381.16	682.211	-33.6499	681.406	225.645	681.406	-144.998
681.738	103.78	721.89	-15.1178	722.691	-0.378323	722.691	-1.32155	724.294	9.35558	723.162	93.9873	691.866	3896.49	682.915	1525.87	686.136	965.893	692.67	3437.58	686.234	2507.53	688.649	2529.36	683.016	-2.59258	682.211	237.258	682.211	-139.829
682.543	111.781	722.691	-22.0081	723.493	6.23532	723.493	-3.66169	725.095	14.5406	723.963	66.3887	692.67	3451.67	683.72	1751.21	686.941	1301.55	693.474	2856.19	687.039	2577.84	689.454	2564.35	683.82	-4.82757	683.016	261.353	683.016	-103.085
683.348	123.192	723.493	-3.25131	724.294	0.146347	724.294	-7.49608	725.894	6.07465	724.764	44.0279	693.474	3216.85	684.527	1830.21	687.745	1793.02	694.278	2304.72	687.845	2634.8	690.258	2733.99	684.625	2.14559	683.82	298.248	683.82	-10.566
684.153	144.873	724.294	4.62742	725.095	-6.78957	725.095	-1.45619	726.695	2.81962	725.565	40.7487	694.278	2727.77	685.331	1826.44	688.549	2434.2	695.081	1751.72	688.649	2770.66	691.062	2867.87	685.43	-17.6474	684.625	321.174	684.625	25.9911
684.957	173.267	725.095	2.81037	725.894	0.0871854	725.894	-7.59999	727.496	-3.27857	726.364	27.7928	695.081	2272.42	686.136	1844.42	689.354	3078.64	695.885	1366.65	689.454	2759.5	691.866	2959.17	686.234	-3.91569	685.43	315.047	685.43	21.5145
685.764	214.619	725.894	-7.71398	726.695	-4.12263	726.695	-8.57615	728.296	-30.7757	727.165	30.3285	695.885	1907.21	686.941	1950.72	690.158	3593.96	696.689	1187.23	690.258	2778.44	692.67	3070.02	687.039	59.7903	686.234	260.052	686.234	-13.833
686.568	281.862	726.695	-4.33669	727.496	-17.8839	727.496	-0.56345	729.095	-42.2566	727.966	42.7462	696.689	1682.31	687.745	2096.59	690.962	3942.81	697.492	1028.38	691.062	2957.43	693.474	3188.68	687.845	104.418	687.039	215.172	687.039	-44.9829
687.373	360.052	727.496	5.0732	728.296	-16.4703	728.296	5.72817	729.896	-46.2483	728.767	67.8646	697.492	1620.93	688.549	2301.8	691.766	3985.39	698.296	891.447	691.866	2989.19	694.278	3329.57	688.649	86.5565	687.845	192.85	687.845	-44.0318
688.177	470.317	728.296	-0.799501	729.095	-7.87004	729.095	11.7505	730.696	-46.9521	729.565	91.041	698.296	1588.11	689.354	2488.72	692.57	3664.15	699.099	778.87	692.67	3050.12	695.081	3466.72	689.454	43.466	688.649	209.308	688.649	-50.7622
688.981	675.786	729.095	-5.62074	729.896	0.720837	729.896	11.411	731.497	-57.1149	730.366	98.6315	699.099	1566.36	690.158	2828.98	693.374	3108.16	699.902	713.214	693.474	3184.48	695.885	3500.56	690.258	52.7814	689.454	207.15	689.454	-47.6503
689.786	1233.4	729.896	-0.760738	730.696	-5.39149	730.696	5.78817	732.295	-43.1745	731.166	100.08	699.902	1526.25	690.962	3137.75	694.18	2485.73	700.706	653.396	694.278	3371.75	696.689	3524.28	691.062	21.3665	690.258	163.09	690.258	-50.8656
690.59	2369.93	730.696	4.82124	731.497	-12.7057	731.497	5.0769	733.096	-20.0598	731.967	98.1099	700.706	1480.1	691.766	3250.59	694.983	1794.1	701.509	608.165	695.081	3451.79	697.492	3557.32	691.866	-71.3944	691.062	191.492	691.062	24.1508
691.394	3672.53	731.497	15.2971	732.295	-17.2456	732.295	1.3435	733.896	-33.5718	732.765	97.0446	701.509	1412.56	692.57	3388.81	695.787	1322.08	702.312	588.82	695.885	3572.43	698.296	3657.1	692.67	-76.1862	691.866	196.658	691.866	23.0239
692.198	3986.86	732.295	17.3613	733.096	-5.74334	733.096	10.1992	734.694	-40.4349	733.566	82.8458	702.312	1345.75	693.374	3472.74	696.591	962.608	703.115	542.737	696.689	3665.1	699.099	3768.91	693.474	24.0484	692.67	160.497	692.67	-13.6365
693.002	2878.29	733.096	8.9738	733.896	-9.64645	733.896	10.6616	735.495	-74.0821	734.366	64.1582	703.115	1286.89	694.18	3378.53	697.394	710.884	703.918	526.112	697.492	3718.6	699.902	3840.42	694.278	53.7112	693.474	140.824	693.474	-64.9363
693.806	1673.01	733.896	-0.101755	734.694	-12.8194	734.694	2.4704	736.295	-68.0639	735.166	34.6176	703.918	1277.23	694.983	3471.51	698.198	635.952	704.721	510.19	698.296	3766.86	700.706	3838.49	695.081	74.2909	694.278	119.482	694.278	-32.6594
694.609	928.626	734.694	-8.30997	735.495	-8.37292	735.495	0.816637	737.095	-16.8659	735.964	15.4861	704.721	1272.34	695.787	3517.44	699.001	579.946	705.524	489.666	699.099	3893.21	701.509	3805.17	695.885	39.1391	695.081	105.418	695.081	-19.974
695.413	563.83	735.495	-8.6007	736.295	-0.786226	736.295	-8.33321	737.893	-5.41094	736.764	18.732	705.524	1307.85	696.591	3549.08	699.804	538.428	706.326	490.759	699.902	4011.98	702.312	3801.87	696.689	0.786715	695.885	94.4829	695.885	-37.9114
696.217	388.385	736.295	-1.83643	737.095	-0.417245	737.095	-12.9681	738.693	-3.22208	737.564	27.3378	706.326	1220.67	697.394	3583.2	700.608	493.167	707.129	472.905	700.706	4019.51	703.115	3904.15	697.492	-25.7828	696.689	71.0578	696.689	-39.3381
697.02	295.532	737.095	0.0775274	737.893	2.66383	737.893	-18.2411	739.492	-11.2691	738.362	25.4791	707.129	1237.92	698.198	3859.28	701.411	430.319	707.932	469.951	701.509	3928.83	703.918	3917.55	698.296	-76.9908	697.492	20.484	697.492	-38.1078
697.824	216.626	737.893	-1.1726	738.693	2.42562	738.693	-16.4791	740.29	-4.4695	739.162	38.0299	707.932	1263.15	699.001	3967.39	702.214	340.966	708.734	463.588	702.312	3892.53	704.721	3893.53	699.099	-83.1951	698.296	-19.0417	698.296	-15.332
698.627	168.055	738.693	3.05749	739.492	-2.95341	739.492	-13.8931	741.09	-0.0494257	739.962	27.4211	708.734	1377.16	699.804	4004.65	703.017	266.39	709.537	439.52	703.115	3923.03	705.524	3913.88	699.902	-83.4633	699.099	-58.2847	699.099	-16.0454
699.431	134.661	739.492	-2.3016	740.29	-4.13819	740.29	-12.5437	741.889	-9.74157	740.76	17.6001	709.537	1501.7	700.608	3816.2	703.82	244.306	710.339	416.077	703.918	3974.51	706.326	3995.69	700.706	-46.4162	699.902	-62.8189	699.902	-23.913
700.234	116.493	740.29	1.78798	741.09	-3.06706	741.09	-0.0482957	742.687	-35.9207	741.559	22.1166	710.339	1554.18	701.411	3765.42	704.623	183.109	711.139	365.328	704.721	3921.95	707.129	3978.86	701.509	-32.595	700.706	-47.1519	700.706	-56.8412
701.037	103.901	741.09	-0.930329	741.889	-7.51196	741.889	-2.7031	743.486	-72.5805	742.359	16.0909	711.139	1504.9	702.214	3869.79	705.424	97.9729	711.942	351.828	705.524	3911.91	707.932	3953.92	702.312	-47.2386	701.509	-7.66383	701.509	-67.8621
701.84	91.1517	741.889	-0.654138	742.687	-4.97891	742.687	-2.81725	744.284	-83.8142	743.156	37.7913	711.942	1363.83	703.017	3768	706.227	29.3834	712.744	366.152	706.326	3917.48	708.734	3965.52	703.115	-68.1402	702.312	-1.29144	702.312	-69.1958
702.643	84.464	742.687	-13.3299	743.486	3.96071	743.486	-12.5393	745.083	-58.5224	743.956	67.0379	712.744	1233.87	703.82	3595.94	707.029	4.25086	713.546	361.536	707.129	3903.63	709.537	3926.75	703.918	-53.0496	703.115	18.7118	703.115	-69.6714
703.446	76.4495	743.486	-9.99135	744.284	17.3157	744.284	-24.6572	745.882	-49.7952	744.755	73.0581	713.546	1168.12	704.623	3616.5	707.832	-4.30166	714.348	356.55	707.932	3718.96	710.339	3857.41	704.721	37.8517	703.918	18.3913	703.918	-57.1204
704.249	66.2193	744.284	-7.59769	745.083	13.0155	745.083	-11.4271	746.68	-23.9856	745.552	40.5823	714.348	1151.28	705.424	3690.38	708.634	36.1238	715.15	322.959	708.734	3844.75	711.139	3724.82	705.524	75.757	704.721	-13.876	704.721	-66.0012
705.052	56.1933	745.083	-5.67404	745.882	20.884	745.882	-9.48352	747.479	-30.7428	746.351	17.6056	715.15	1164.11	706.227	3833.02	709.437	35.7766	715.952	333.96	709.537	3796.91	711.942	3709.22	706.326	60.0049	705.524	-40.3553	705.524	-30.447
705.855	49.2497	745.882	-3.12532	746.68	21.7092	746.68	-9.76891	748.276	-18.7276	747.149	-3.20153	715.952	1071.62	707.029	3831.44	710.239	-4.17465	716.754	304.218	710.339	3713.16	712.744	3604.89	707.129	13.696	706.326	-49.0089	706.326	-20.5633
706.658	43.0289	746.68	-3.93452	747.479	10.3548	747.479	-9.94453	749.075	0.470721	747.948	6.79146	716.754	942.048	707.832	3685.91	711.042	8.3747	717.553	271.805	711.139	3604.61	713.546	3474.29	707.932	-57.6626	707.129	-59.4442	707.129	-62.331
707.46	41.6797	747.479	-2.87336	748.276	2.02706	748.276	-6.73798	749.873	17.3131	748.747	10.7975	717.553	860.775	708.634	3572.88	711.844	19.5353	718.355	235.011	711.942	3510.89	714.348	3343.82	708.734	-49.3842	707.932	-57.1724	707.932	-126.699
708.263	39.6683	748.276	-3.21254	749.075	0.859399	749.075	0.635162	750.67	22.3404	749.544	5.77052	718.355	757.729	709.437	3542.23	712.646	26.6314	719.157	191.825	712.744	3464.68	715.15	3160.16	709.537	-3.03958	708.734	-49.4048	708.734	-113.848
709.066	40.0858	749.075	0	749.873	3.21185	749.873	-7.15069	751.469	15.522	750.342	-9.70446	719.157	684.986	710.239	3568.37	713.448	18.6208	719.958	157.694	713.546	3421.88	715.952	3043.13	710.339	63.6166	709.537	-35.3875	709.537	-66.3217
709.868	48.6503	749.873	6.31364	750.67	3.35197	750.67	3.69096	752.266	7.16908	751.139	-23.2152	719.958	611.113	711.042	3492.1	714.248	41.4755	720.76	144.201	714.348	3377.87	716.754	2940.48	711.139	80.7455	710.339	-21.8037	710.339	-8.06405
710.67	48.3158	750.67	0	751.469	0.602514	751.469	2.66505	753.064	1.26624	751.938	-22.3774	720.76	653.125	711.844	3358.36	715.05	45.5485	721.561	126.759	715.15	3352.19	717.553	2829.8	711.942	62.5796	711.139	-12.2923	711.139	3.32901
711.471	41.3048	751.469	-2.39366	752.266	2.54239	752.266	-3.21679	753.861	-7.12907	752.737	-3.9062	721.561	684.282	712.646	3211.9	715.852	29.9338	722.36	109.786	715.952	3206.51	718.355	2698.32	712.744	35.6882	711.942	-0.047133	711.942	7.52645
712.273	34.3657	752.266	-1.30343	753.064	5.03807	753.064	-10.8768	754.659	-9.51562	753.533	-0.937709	722.36	709.042	713.448	3112.34	716.654	-4.01376	723.162	102.734	716.754	2973.16	719.157	2566.98	713.546	39.747	712.744	28.8077	712.744	11.1346
713.075	29.5166	753.064	0.838265	753.861	2.05353	753.861	-3.7056	755.456	35.7489	754.332	29.2909	723.162	642.59	714.248	2934.7	717.456	75.7703	723.963	111.22	717.553	2796.02	719.958	2367.14	714.348	81.5322	713.546	37.2917	713.546	17.9063
713.877	26.7957	753.861	1.19683	754.659	-3.06862	754.659	-4.291	756.254	40.4396	755.128	44.1334	723.963	646.45	715.05	2719.1	718.257	-25.4374	724.764	114.736	718.355	2650.55	720.76	2130.82	715.15	55.3204	714.348	40.8643	714.348	17.8546
714.679	25.4959	754.659	5.48506	755.456	4.82945	755.456	-1.69913	757.052	43.1722	755.926	71.5877	724.764	595.993	715.852	2389.12	719.059	0	725.565	103.046	719.157	2579.36	721.561	1970.12	715.952	12.4086	715.15	24.5375	715.15	-5.37604
715.481	24.3667	755.456	13.7224	756.254	-0.026467	756.254	6.88434	757.849	50.8355	756.723	92.3782	725.565	537.177	716.654	2180.18	719.859	52.7039	726.364	73.3469	719.958	2425.35	722.36	1941.38	716.754	8.40354	715.952	6.59862	715.952	-70.5191
716.283	24.0816	756.254	-1.95272	757.052	5.08478	757.052	8.94495	758.647	41.4635	757.521	105.545	726.364	406.854	717.456	2067.14	720.66	22.245	727.165	45.1458	720.76	2297.03	723.162	1719.07	717.553	56.8044	716.754	-23.5665	716.754	-109.806
717.083	23.7673	757.052	0.222891	757.849	5.57364	757.849	2.26697	759.443	12.4011	758.317	73.0026	727.165	309.545	718.257	1991.22	721.461	-1.11776	727.966	26.7452	721.561	2206.61	723.963	1606.02	718.355	23.7981	717.553	-41.4016	717.553	-140.335
717.884	25.1547	757.849	-3.08171	758.647	11.7327	758.647	-1.98891	760.241	-36.1537	759.115	59.8858	727.966	224.988	719.059	1978.32	722.263	-6.03757	728.767	31.83	722.36	2106.19	724.764	1435.96	719.157	-6.38312	718.355	-16.7134	718.355	-137.926
718.686	26.5061	758.647	-7.6413	759.443	5.09568	759.443	-6.35894	761.037	-56.2323	759.911	39.2229	728.767	226.651	719.859	1867.6	723.064	0	729.565	44.8688	723.162	1948.26	725.565	1248.6	719.958	-28.5363	719.157	-3.74236	719.157	-126.254
719.488	24.8763	759.443	-5.50445	760.241	0.23976	760.241	-7.71561	761.834	-40.4749	760.709	28.3643	729.565	213.749	720.66	1797.91	723.865	7.34162	730.366	22.9244	723.963	1755.7	726.364	1097.3	720.76	-27.9284	719.958	13.2632	719.958	-91.9406
720.289	16.5453	760.241	-0.00484546	761.037	-1.85892	761.037	-6.02233	762.63	-7.07258	761.505	60.8845	730.366	222.471	721.461	1697.2	724.664	17.2321	731.166	12.7192	724.764	1555.34	727.165	975.451	721.561	0.107279	720.76	11.3402	720.76	-42.6051
721.091	16.0536	761.037	-0.431246	761.834	-6.29603	761.834	-4.56175	763.426	-1.65929	762.303	89.6927	731.166	228.421	722.263	1539.62	725.465	4.07303	731.967	15.9008	725.565	1361.2	727.966	870.323	722.36	77.8132	721.561	28.7134	721.561	6.32718
721.89	10.091	761.834	-0.445783	762.63	1.27042	762.63	-4.25588	764.224	1.6946	763.099	103.353	731.967	250.003	723.064	1416.42	726.266	-0.499603	732.765	35.3383	726.364	1244.81	728.767	810.485	723.162	105.903	722.36	15.9687	722.36	11.1243
722.691	9.59491	762.63	-0.838265	763.426	-0.937244	763.426	-3.69682	765.019	-10.4524	763.896	98.8201	732.765	239.809	723.865	1231.58	727.067	-39.494	733.566	57.1194	727.165	1174.55	729.565	761.07	723.963	104.866	723.162	-4.9961	723.162	-41.3955
723.493	10.5198	763.426	1.35188	764.224	-0.373652	764.224	-0.611746	765.817	10.097	764.692	83.3174	733.566	187.177	724.664	1150.77	727.866	-33.2363	734.366	65.0591	727.966	1146.64	730.366	616.199	724.764	63.5809	723.963	2.87511	723.963	-60.1806
724.294	11.8129	764.224	-2.63593	765.019	-1.88383	765.019	-1.21325	766.612	28.6881	765.489	65.2512	734.366	158.11	725.465	982.944	728.667	0	735.166	64.5762	728.767	1038.45	731.166	630.172	725.565	23.9233	724.764	54.9006	724.764	-30.2195
725.095	14.2307	765.019	1.84128	765.817	-8.14405	765.817	-0.862005	767.409	22.7782	766.285	51.9791	735.166	60.5867	726.266	875.259	729.468	5.33474	735.964	46.623	729.565	903.775	731.967	607.276	726.364	-33.7572	725.565	86.8567	725.565	17.193
725.894	14.5989	765.817	11.3675	766.612	-6.68837	766.612	-0.962987	768.205	13.2202	767.082	56.8452	735.964	-0.76773	727.067	790.906	730.268	6.64726	736.764	29.3515	730.366	831.88	732.765	621.898	727.165	-17.4686	726.364	102.382	726.364	-2.08838
726.695	14.3856	766.612	12.6418	767.409	-1.79509	767.409	3.29143	769.002	-12.9613	767.877	64.5133	736.764	39.1969	727.866	546.354	731.067	14.48	737.564	10.5461	731.166	760.161	733.566	629.272	727.966	48.6869	727.165	107.661	727.165	-5.54145
727.496	17.0167	767.409	3.261	768.205	8.13627	768.205	2.97824	769.797	-25.7908	768.673	82.8291	737.564	51.1607	728.667	582.12	731.867	16.9357	738.362	-10.7023	731.967	753.729	734.366	446.884	728.767	103.364	727.966	108.019	727.966	-1.40604
728.296	15.2948	768.205	-6.11497	769.002	-0.256886	769.002	-0.727363	770.592	-44.9633	769.47	113.18	738.362	57.6011	729.468	407.253	732.668	-1.6597	739.162	-12.5204	732.765	680.072	735.166	495.424	729.565	114.145	728.767	99.9974	728.767	12.5303
729.095	16.6463	769.002	0.998165	769.797	-10.6818	769.797	-5.59352	771.389	-55.3991	770.265	128.122	739.162	52.6322	730.268	247.671	733.468	-13.1844	739.962	-12.3926	733.566	465.247	735.964	455.332	730.366	59.3791	729.565	97.4617	729.565	-8.98418
729.896	12.6054	769.797	2.27737	770.592	-6.45484	770.592	-3.66901	772.184	-49.8635	771.062	105.662	739.962	50.9474	731.067	102.449	734.266	-11.9566	740.76	-14.8356	734.366	324.452	736.764	384.022	731.166	31.6831	730.366	86.5928	730.366	-21.6799
730.696	9.67573	770.592	1.60869	771.389	7.23172	771.389	-3.55632	772.981	-36.6621	771.857	62.1718	740.76	46.597	731.867	100.716	735.067	30.8992	741.559	-10.6881	735.166	308.527	737.564	392.695	731.967	38.3523	731.166	68.1826	731.166	-55.5593
731.497	6.54852	771.389	-3.01872	772.184	0.393891	772.184	-10.0484	773.776	-11.0855	772.652	42.6297	741.559	31.0718	732.668	51.7055	735.867	24.8362	742.359	-3.52247	735.964	320.069	738.362	397.319	732.765	47.3459	731.967	62.5173	731.967	-86.0683
732.295	3.79397	772.184	0	772.981	2.12826	772.981	-7.77268	774.57	5.05554	773.449	29.2077	742.359	-22.0296	733.468	43.3895	736.665	0	743.156	-0.12073	736.764	324.563	739.162	378.923	733.566	39.747	732.765	31.9279	732.765	-46.6991
733.096	1.38962	772.981	-3.64379	773.776	-3.90933	773.776	-2.34015	775.367	7.47505	774.243	32.0097	743.156	27.6383	734.266	62.909	737.465	6.46096	743.956	13.543	737.564	346.325	739.962	314.661	734.366	-4.89909	733.566	13.7157	733.566	-36.8052
733.896	-2.06086	773.776	-0.925484	774.57	3.16514	774.57	0.689312	776.162	7.71512	775.04	-0.521566	743.956	41.0736	735.067	0.1155	738.265	-19.8825	744.755	28.6414	738.362	355.532	740.76	197.06	735.166	-17.2541	734.366	-7.49415	734.366	-26.9215
734.694	-3.27089	774.57	-3.13017	775.367	3.06239	775.367	5.09593	776.956	-4.53304	775.835	-0.282977	744.755	49.6892	735.867	-1.6555	739.065	-17.4946	745.552	39.3934	739.162	382.14	741.559	92.9061	735.964	-32.2732	735.166	-12.8108	735.166	-17.0379
735.495	-1.32228	775.367	0.954556	776.162	1.43856	776.162	0.641016	777.753	5.38269	776.629	-0.0499372	745.552	-3.36948	736.665	10.472	739.862	0	746.351	32.6964	739.962	301.897	742.359	54.4639	736.764	48.4366	735.964	-17.3827	735.964	-7.17494
736.295	1.22574	776.162	-10.5001	776.956	1.46503	776.956	-1.07714	778.547	12.0834	777.426	-0.848932	746.351	-52.1417	737.465	-14.553	740.662	-10.5001	747.149	15.8582	740.76	271.633	743.156	42.2164	737.564	100.753	736.764	-26.1306	736.764	-1.08555
737.095	4.21377	776.956	-0.276191	777.753	-1.02443	777.753	0.0585403	779.341	21.9074	778.22	2.69106	747.149	-50.1371	738.265	-31.9165	741.462	-7.25694	747.948	12.9962	741.559	251.787	743.956	87.6071	738.362	117.292	737.564	-23.0009	737.564	-2.20211
737.893	4.79746	777.753	15.2584	778.547	0.325389	778.547	2.19526	780.137	14.8889	779.014	12.3234	747.948	-12.8382	739.065	0	742.259	-19.349	748.747	16.0997	742.359	183.129	744.755	132.573	739.162	119.67	738.362	6.23099	738.362	-3.29799
738.693	4.0656	778.547	3.64379	779.341	-2.71053	779.341	6.47016	780.932	3.93287	779.811	28.037	748.747	-4.52108	739.862	0	743.059	-20.4922	749.544	16.7246	743.156	118.768	745.552	54.9888	739.962	105.223	739.162	17.9765	739.162	-4.41455
739.492	3.84111	779.341	0	780.137	0.38455	780.137	-1.46497	781.726	-6.2653	780.605	57.5887	749.544	3.02827	740.662	0	743.856	-0.389521	750.342	5.6672	743.956	116.565	746.351	19.396	740.76	62.8299	739.962	-3.93089	739.962	-5.52078
740.29	4.4652	780.137	2.01087	780.932	10.4389	780.932	5.14276	782.522	0.743739	781.399	87.6342	750.342	0	741.462	-0.077	744.656	21.2035	751.139	-13.0317	744.755	61.168	747.149	-25.5448	741.559	20.7943	740.76	-27.62	740.76	-6.63734
741.09	3.03068	780.932	11.0525	781.726	7.4995	781.726	5.49839	783.316	5.11674	782.195	109.729	751.139	6.78162	742.259	0	745.455	0.00846784	751.938	-10.3188	745.552	-1.54186	747.948	16.1217	742.359	-5.98976	741.559	-23.2743	741.559	-8.45692
741.889	3.87254	781.726	-0.305264	782.522	2.94407	782.522	1.95085	784.11	16.2399	782.989	112.88	751.938	14.6722	743.059	0.7315	746.252	-2.65043	752.737	-4.34627	746.351	-34.736	748.747	15.2219	743.156	-14.8939	742.359	-10.6992	742.359	-3.47375
742.687	3.73111	782.522	3.25615	783.316	-0.259999	783.316	-6.33845	784.905	27.0806	783.783	89.2988	752.737	1.02364	743.856	0	747.051	-22.372	753.533	5.34762	747.149	-21.5861	749.544	43.4911	743.956	-4.61301	743.156	26.9884	743.156	-8.92215
743.486	-2.2427	783.316	0	784.11	0.146347	784.11	-5.02715	785.699	46.4625	784.579	58.6484	753.533	-0.0853034	744.656	0	747.85	0	754.332	18.5853	747.948	12.5332	750.342	34.243	744.755	1.77011	743.956	19.843	743.956	-6.66835
744.284	-5.17685	784.11	0	784.905	-3.30526	784.905	-1.27032	786.493	73.3454	785.372	40.2105	754.332	-48.3883	745.455	0	748.647	-2.4218	755.128	13.1098	748.747	77.8862	751.139	1.54968	745.552	23.3154	744.755	31.7771	744.755	-5.62416
745.083	-3.51559	784.905	-5.1798	785.699	1.22215	785.699	0.986404	787.286	92.1978	786.166	40.4491	755.128	-31.8395	746.252	0	749.446	6.83355	755.926	-0.61075	749.544	183.372	751.938	7.29851	746.351	7.54531	745.552	23.2083	745.552	-28.3586
745.882	0.0606136	785.699	-7.36026	786.493	9.9983	786.493	-2.38991	788.082	75.6119	786.962	40.6877	755.926	-0.575798	747.051	-16.5935	750.243	28.2911	756.723	-15.3398	750.342	207.931	752.737	19.2211	747.149	9.35118	746.351	0.0282798	746.351	11.6722
746.68	0.242455	786.493	-4.44329	787.286	6.84094	787.286	4.98031	788.875	27.2877	787.755	56.7342	756.723	16.0157	747.85	5.082	751.042	8.27308	757.521	0.362189	751.139	210.002	753.533	-16.6216	747.948	25.3537	747.149	-8.49337	747.149	-17.958
747.479	0.0785732	787.286	2.26768	788.082	2.54395	788.082	6.17307	789.669	25.1836	788.549	92.6113	757.521	11.7932	748.647	-14.322	751.839	2.36253	758.317	22.7043	751.938	170.112	754.332	21.9705	748.747	34.8121	747.948	-6.18385	747.948	-12.3959
748.276	-4.50112	788.082	-4.83577	788.875	-0.742633	788.875	12.9506	790.462	28.3327	789.342	119.627	758.317	4.00926	749.446	2.772	752.637	-2.14236	759.115	33.2149	752.737	78.8554	755.128	0	749.544	28.8581	748.747	0.160252	748.747	-4.47658
749.075	0	788.875	5.35424	789.669	-0.129221	789.669	7.95855	791.257	9.74863	790.138	123.245	759.115	-72.9131	750.243	-10.4335	753.436	-41.1029	759.911	45.5506	753.533	99.4943	755.926	7.42349	750.342	-33.7036	749.544	0.329931	749.544	19.9327
749.873	-0.969818	789.669	5.18465	790.462	-5.02562	790.462	-17.5445	792.05	0.418942	790.931	102.61	759.911	-64.532	751.042	-3.1955	754.232	-14.2683	760.709	39.8124	754.332	63.2385	756.723	-59.8128	751.139	-82.7123	750.342	12.5845	750.342	27.1903
750.67	-6.14443	790.462	0	791.257	0.244431	791.257	-12.3813	792.844	4.89079	791.724	86.5744	760.709	-4.9476	751.839	-1.0395	755.031	26.4874	761.505	22.8179	755.128	45.8815	757.521	0.874822	751.938	-8.18899	751.139	37.6687	751.139	10.018
751.469	-6.79995	791.257	-11.7599	792.05	-1.56622	792.05	-7.90001	793.637	13.1496	792.517	77.5746	761.505	-5.86461	752.637	0	755.827	12.0836	762.303	9.38141	755.926	20.5949	758.317	20.4458	752.737	22.9578	751.938	51.309	751.938	-56.5104
752.266	-8.52856	792.05	-9.6134	792.844	-5.94574	792.844	-1.93476	794.43	11.1255	793.312	54.7755	762.303	-6.8456	753.436	0	756.625	5.10611	763.099	0.482919	756.723	42.2691	759.115	-0.649867	753.533	43.7521	752.737	44.5219	752.737	-51.5583
753.064	-17.2951	792.844	-3.9539	793.637	-6.59963	793.637	0	795.224	0.755507	794.105	48.55	763.099	-5.09688	754.232	7.8155	757.422	1.98148	763.896	0.0781192	757.521	79.6924	759.911	-66.8364	754.332	62.669	753.533	25.3293	753.533	-35.6783
753.861	-15.2859	793.637	-11.9731	794.43	-5.0225	794.43	-8.73567	796.017	-11.7727	794.898	30.2952	763.896	0.341214	755.031	7.546	758.22	0	764.692	-5.81633	758.317	87.0493	760.709	3.29933	755.128	102.201	754.332	28.8454	754.332	-34.7478
754.659	-5.56748	794.43	-4.97629	795.224	0.231976	795.224	-27.4027	796.81	-25.0988	795.691	9.86537	764.692	0.149281	755.827	0.539	759.016	-1.30405	765.489	1.34223	759.115	114.759	761.505	41.8665	755.926	120.206	755.128	36.0379	755.128	-21.7213
755.456	-8.98429	795.224	-1.54086	796.017	1.46191	796.017	-24.1523	797.603	-38.2837	796.484	-6.10343	765.489	5.41676	756.625	-3.3495	759.814	-29.8068	766.285	0.987143	759.911	73.9875	762.303	59.113	756.723	99.3049	755.926	19.268	755.926	-18.3716
756.254	-5.43278	796.017	0.348873	796.81	-0.0591616	796.81	-18.8778	798.395	-15.3455	797.279	-17.2339	766.285	0.639775	757.422	-71.9565	760.61	-48.3853	767.082	-23.1091	760.709	-5.72693	763.099	8.27331	757.521	71.591	756.723	-3.12963	756.723	-42.2226
757.052	-2.05188	796.81	-2.90728	797.603	-0.0124551	797.603	-16.8845	799.19	-2.55131	798.071	-18.6432	767.082	21.7524	758.22	9.24	761.408	-25.8015	767.877	-17.8112	761.505	-44.8242	763.896	-36.3426	758.317	75.918	757.521	-10.982	757.521	-45.4482
757.849	-3.75805	797.603	0.78012	798.395	0	798.395	-7.96148	799.982	-5.68631	798.864	-8.42829	767.877	0	759.016	21.637	762.204	-3.69198	768.673	-11.8244	762.303	-77.2474	764.692	-19.2211	759.115	146.347	758.317	6.42894	758.317	-78.5728
758.647	-4.29683	798.395	4.99567	799.19	1.47904	799.19	-15.4751	800.775	2.47835	799.656	4.61087	768.673	26.1028	759.814	-27.489	763.001	0.245567	769.47	8.56471	763.099	-128.503	765.489	0.499898	759.911	130.434	759.115	5.53342	759.115	-33.2487
759.443	-6.90996	799.19	-0.513619	799.982	0	799.982	-20.4276	801.567	19.8362	800.449	12.1791	769.47	3.62539	760.61	0	763.797	-0.19476	770.265	28.0235	763.896	-162.843	766.285	-33.4182	760.709	71.3586	759.911	-5.09979	759.911	-56.5001
760.241	-5.72911	799.982	-1.93334	800.775	1.03377	800.775	0	802.359	6.34767	801.241	1.22624	770.265	13.5419	761.408	-0.7315	764.595	-7.59566	771.062	38.3992	764.692	-167.887	767.082	-2.97439	761.505	31.0931	760.709	-11.1894	760.709	-75.3265
761.037	-5.80319	800.775	-2.49057	801.567	0	801.567	0	803.152	-18.4523	802.035	-0.0443886	771.062	9.74591	762.204	-13.321	765.39	-9.43318	771.857	-10.4751	765.489	-147.204	767.877	0	762.303	17.5223	761.505	7.09823	761.505	-88.1153
761.834	-6.16688	801.567	-1.6523	802.359	-0.747304	802.359	-4.31734	803.944	-37.2999	802.828	15.7635	771.857	-18.7881	763.001	1.078	766.188	2.08309	772.652	13.2093	766.285	-84.6484	768.673	24.0701	763.099	-25.0318	762.303	11.6701	762.303	-32.8765
762.63	-5.7583	802.359	0	803.152	-1.53976	803.152	-8.44882	804.738	-47.451	803.62	19.7807	772.652	-48.5376	763.797	-30.4535	766.983	28.5366	773.449	1.68311	767.082	0.110133	769.47	0.274944	763.896	2.18135	763.099	5.52399	763.099	-4.31117
763.426	-4.10152	803.152	-1.48271	803.944	-0.991734	803.944	0	805.53	-39.1522	804.412	22.6992	773.449	-6.37643	764.595	0	767.78	-54.8208	774.243	10.3757	767.877	101.014	770.265	54.139	764.692	-14.2503	763.896	-2.6583	763.896	3.7839
764.224	-2.01821	803.944	-14.9434	804.738	-3.09664	804.738	3.55193	806.322	-34.5721	805.204	17.6278	774.243	18.6814	765.39	-4.466	768.576	0.0169357	775.04	16.2985	768.673	228.416	771.062	76.2345	765.489	-26.9986	764.692	-9.58686	764.692	-29.196
765.019	-0.749813	804.738	2.96542	805.53	-5.06921	805.53	0.756633	807.114	-26.8405	805.996	26.7608	775.04	4.52108	766.188	-13.8215	769.371	-13.0151	775.835	6.73246	769.47	234.121	771.857	-0.949806	766.285	-12.3729	765.489	-4.7133	765.489	-65.2258
765.817	-1.03268	805.53	5.50445	806.322	2.12826	806.322	1.88353	807.905	-33.2753	806.788	20.3022	775.835	-2.5591	766.983	-27.1425	770.168	12.126	776.629	15.986	770.265	174.231	772.652	-6.04877	767.082	0.983393	766.285	-14.0456	766.285	-110.188
766.612	-1.10901	806.322	-6.87087	807.114	1.2564	807.114	3.34411	808.697	-30.7287	807.58	24.214	776.629	29.515	767.78	30.954	770.963	6.36782	777.426	24.8206	771.062	85.4413	773.449	-6.99857	767.877	-14.1251	767.082	2.07385	767.082	-116.246
767.409	0.170616	807.114	-1.80736	807.905	1.24239	807.905	-7.29119	809.489	-19.502	808.373	28.0092	777.426	-4.43578	768.576	43.4665	771.76	-10.6271	778.22	27.988	771.857	-1.96037	774.243	-3.14936	768.673	2.25287	767.877	20.9648	767.877	-118.8
768.205	1.58493	807.905	1.79282	808.697	0.776885	808.697	-22.1721	810.28	-12.5612	809.165	39.8277	778.22	-29.2164	769.371	-14.245	772.555	-6.76581	779.014	21.8947	772.652	-92.9304	775.04	-12.5974	769.47	14.2503	768.673	41.0152	768.673	-64.1196
769.002	1.5131	808.697	4.38514	809.489	5.41017	809.489	0	811.072	2.28064	809.957	44.605	779.014	1.25822	770.168	0	773.35	0	779.811	6.71115	773.449	-69.8244	775.835	1.72465	770.265	2.89654	769.47	29.8541	769.47	-26.7768
769.797	1.03043	809.489	8.3875	810.28	7.65831	810.28	-2.69578	811.863	12.4082	810.748	37.6582	779.811	52.3123	770.963	6.2755	774.146	-3.1077	780.605	5.87315	774.243	-64.0094	776.629	13.3223	771.062	-20.4903	770.265	40.5344	770.265	-12.6957
770.592	-0.170616	810.28	0.474855	811.072	-0.521556	811.072	-2.49821	812.655	24.6446	811.54	29.7848	780.605	14.0537	771.76	-30.6845	774.941	-6.59645	781.399	8.07469	775.04	-77.3796	777.426	26.6446	771.857	-59.9155	771.062	35.133	771.062	-1.74721
771.389	-1.29983	811.072	-1.73468	811.863	0.108982	811.863	-5.34034	813.446	36.4738	812.331	45.7092	781.399	61.0559	772.555	0	775.738	-0.525006	782.195	0.191747	775.835	-103.283	778.22	39.9669	772.652	-105.724	771.857	41.5713	771.857	11.941
772.184	-5.94912	811.863	3.13502	812.655	-2.40227	812.655	5.25253	814.237	17.5791	813.122	41.7974	782.195	89.5472	773.35	-57.2495	776.532	-26.8431	782.989	-5.19848	776.629	-162.424	779.014	13.3973	773.449	-90.3292	772.652	43.598	772.652	0.0723697
772.981	-1.42779	812.655	7.00654	813.446	0.677244	813.446	12.0051	815.028	-9.09668	813.914	46.8577	782.989	62.9966	774.146	0.1925	777.327	-19.7894	783.783	-9.02632	777.426	-166.962	779.811	4.97399	774.243	-88.5412	773.449	-18.1179	773.449	-43.0807
773.776	4.37765	813.446	-3.60987	814.237	2.28083	814.237	14.8648	815.819	-6.21352	814.705	64.247	783.783	0.682427	774.941	5.621	778.123	-4.90288	784.579	-27.1784	778.22	-173.724	780.605	33.6681	775.04	-96.0865	774.243	26.1306	774.243	-78.0249
774.57	5.12522	814.237	-0.688056	815.028	0.330059	815.028	7.69658	816.612	-0.819054	815.496	61.0399	784.579	-45.8292	775.738	-7.623	778.917	0.0508071	785.372	-11.1	779.014	-154.451	781.399	29.569	775.835	-75.4889	775.04	21.6906	775.04	-87.8878
775.367	4.87603	815.028	-0.353719	815.819	0.196167	815.819	6.56675	817.403	-0.0211824	816.287	43.7727	785.372	-47.1941	776.532	-31.724	779.712	0.86372	786.166	-8.79907	779.811	-60.5292	782.195	5.67384	776.629	-93.1899	775.835	14.0079	775.835	-52.5094
776.162	6.22076	815.819	0.595992	816.612	-0.666346	816.612	3.37777	818.194	1.96997	817.078	28.6861	786.166	-16.165	777.327	-50.0115	780.508	-13.6925	786.962	-0.205951	780.605	-12.9737	782.989	-44.216	777.426	-88.7021	776.629	0.188532	776.629	-45.9238
776.956	8.1806	816.612	2.61655	817.403	-2.38047	817.403	-2.27429	818.985	21.1236	817.869	3.85071	786.962	-1.85535	778.123	-15.4	781.302	-21.6353	787.755	14.097	781.399	61.3442	783.783	-7.82341	778.22	-56.1607	777.426	-16.8453	777.426	-57.5649
777.753	8.38489	817.403	10.379	818.194	0.538682	818.194	-7.93806	819.776	39.1569	818.66	-1.09862	787.755	16.9967	778.917	0	782.096	-0.66896	788.549	4.81499	782.195	-1.67402	784.579	0	779.014	-50.7431	778.22	7.4753	778.22	-97.4303
778.547	4.40235	818.194	12.1234	818.985	1.55844	818.985	1.92305	820.566	50.4307	819.45	-20.5353	788.549	-8.50901	779.712	58.4045	782.892	14.734	789.342	-11.5545	782.989	-17.5332	785.372	41.6665	779.811	-35.6346	779.014	37.5085	779.014	-127.97
779.341	1.8229	818.985	4.67103	819.776	-0.901435	819.776	12.4135	821.355	57.089	820.241	-27.4654	789.342	-8.31708	780.508	24.563	783.686	0	790.138	-20.1548	783.783	-45.9035	786.166	0	780.605	-42.2144	779.811	-12.7919	779.811	-133.553
780.137	0.00673485	819.776	-0.838265	820.566	-3.60263	820.566	9.41035	822.146	56.6042	821.032	-29.6627	790.138	16.9114	781.302	24.9095	784.48	6.49484	790.931	-0.944533	784.579	-16.0134	786.962	-1.79963	781.399	-31.7547	780.605	-0.197959	780.605	-120.589
780.932	-0.608381	820.566	-2.11262	821.355	-4.02454	821.355	9.34742	822.936	47.1757	821.822	-26.156	790.931	5.94991	782.096	11.1265	785.274	-7.39243	791.724	24.4655	785.372	-109.274	787.755	2.79943	782.195	-44.1812	781.399	51.8746	781.399	-107.149
781.726	-0.758793	821.355	-12.2445	822.146	-1.03688	822.146	9.28741	823.727	42.459	822.613	-18.9206	791.724	0.234584	782.892	45.0065	786.069	-0.0677427	792.517	62.9641	786.166	-105.772	788.549	4.4241	782.989	-71.2513	782.195	92.8049	782.195	-133.822
782.522	-1.21452	822.146	-10.0689	822.936	0.18994	822.936	7.86488	824.517	36.7562	823.403	-13.6328	792.517	24.0982	783.686	55.6325	786.863	5.07224	793.312	53.8597	786.962	-110.133	789.342	-5.14895	783.783	-124.998	782.989	116.324	782.989	-107.345
783.316	0.118982	822.936	-0.237428	823.727	2.51125	823.727	1.82792	825.307	34.5697	824.194	0.321817	793.312	0.469169	784.48	8.778	787.656	-6.9267	794.105	45.1103	787.755	-107.424	790.138	12.7724	784.579	-150.012	783.783	74.3099	783.783	-64.4814
784.11	0.166126	823.727	4.53051	824.517	-1.51173	824.517	-6.81409	826.097	35.8807	824.984	-1.45373	794.105	12.4543	785.274	-26.1415	788.452	-23.7777	794.898	21.6461	788.549	-4.97802	790.931	28.4442	785.372	-95.8719	784.579	21.9828	784.579	-46.0685
784.905	-1.95535	824.517	4.78247	825.307	0	825.307	-3.32509	826.887	31.809	825.774	-12.0848	794.898	0.639775	786.069	0	789.245	-28.2657	795.691	10.7094	789.342	69.3619	791.724	7.79841	786.166	-38.2629	785.372	14.6961	785.372	-53.8224
785.699	1.48167	825.307	-2.37428	826.097	1.64095	826.097	-6.44821	827.677	22.4393	826.564	-17.5668	795.691	8.50901	786.863	-31.031	790.039	-46.8526	796.484	0.916126	790.138	83.7453	792.517	-6.99857	786.962	-9.01146	786.166	7.39989	786.166	-8.28116
786.493	8.84735	826.097	1.2259	826.887	0.57449	826.887	-2.22892	828.467	25.8308	827.354	-36.4763	796.484	17.4445	787.656	-11.5115	790.832	0	797.279	-8.57181	790.931	46.0797	793.312	-8.3483	787.755	-0.339718	786.962	15.799	786.962	27.3144
787.286	14.004	826.887	0.474855	827.677	0	827.677	-3.19484	829.257	20.5611	828.144	-4.13369	797.279	1.00231	788.452	6.6605	791.627	1.63429	798.071	-29.1882	791.724	-22.0487	794.105	-4.54907	788.549	-17.4329	787.755	8.51222	787.755	20.4186
788.082	13.1868	827.677	7.05984	828.467	2.00527	828.467	-2.12648	830.047	1.25682	828.934	-1.66457	798.071	33.0337	789.245	-8.8935	792.42	5.93596	798.864	-0.12073	792.517	-23.8989	794.898	11.7726	789.342	-40.0867	788.549	1.22546	788.549	-21.194
788.875	9.74982	828.467	6.60437	829.257	2.99233	829.257	-1.32301	830.837	2.72312	829.724	-1.80884	798.864	-49.2627	790.039	-25.872	793.213	3.74279	799.656	3.61479	793.312	54.0093	795.691	-21.4456	790.138	-79.9946	789.342	0.678716	789.342	-44.5487
789.669	7.43303	829.257	2.15623	830.047	2.0582	830.047	-3.96318	831.627	-22.0039	830.514	-19.8417	799.656	-85.8365	790.832	0.077	794.006	-4.39481	800.449	17.0371	794.105	180.288	796.484	33.5932	790.931	-80.0125	790.138	1.49883	790.138	-66.8593
790.462	6.16014	830.047	-2.08839	830.837	-0.381436	830.837	-15.0931	832.414	-45.1657	831.302	-15.9244	800.449	-6.48306	791.627	21.483	794.799	2.81132	801.241	31.4181	794.898	209.495	797.279	0	791.724	-70.7686	790.931	2.31895	790.931	-121.943
791.257	6.28361	830.837	-2.17561	831.627	-3.85484	831.627	-12.232	833.204	-46.0436	832.091	-14.3153	801.241	-7.12283	792.42	-1.078	795.594	46.4292	802.035	37.4901	795.691	207.381	798.071	-36.6425	792.517	-88.7557	791.724	3.13906	791.724	-161.477
792.05	5.38788	831.627	-1.60869	832.414	-6.4455	832.414	-12.1076	833.993	-27.8784	832.881	-8.94985	802.035	-8.18913	793.213	-36.8445	796.387	9.67875	802.828	24.6573	796.484	195.817	798.864	-27.1445	793.312	-85.1619	792.517	3.95917	792.517	-80.3407
792.844	3.56723	832.414	1.35673	833.204	-0.0591616	833.204	-10.2021	834.783	-19.0713	833.67	-3.35134	802.828	-2.26054	794.006	-3.3495	797.18	20.6192	803.62	0	797.279	123.834	799.656	2.37452	794.105	-53.9257	793.312	11.3402	793.312	-56.6241
793.637	3.65029	833.204	-0.101755	833.993	-0.906106	833.993	-13.7775	835.572	-14.4935	834.46	-8.70017	803.62	10.2151	794.799	-16.247	797.972	47.1405	804.412	-6.5052	798.071	65.2429	800.449	30.1189	794.898	-61.9002	794.105	19.8242	794.105	-35.9678
794.43	1.1786	833.993	3.81338	834.783	-1.89784	834.783	0	836.361	-13.2673	835.249	-28.5308	804.412	58.9873	795.594	-13.5135	798.765	29.9338	805.204	-15.915	798.864	44.6921	801.241	48.2152	795.691	-56.4647	794.898	11.9247	794.898	-61.6176
795.224	0.889	834.783	0.203509	835.572	-2.89113	835.572	7.5956	837.151	-14.6724	836.039	-40.1661	805.204	14.5442	796.387	-11.858	799.56	13.701	805.996	-6.12171	799.656	8.6785	802.035	30.7437	796.484	-42.1429	795.691	-5.02438	795.691	-61.659
796.017	5.56299	835.572	-0.678365	836.361	-1.67676	836.361	12.2437	837.938	-8.37413	836.828	-44.0557	805.996	-5.94991	797.18	-4.1195	800.352	6.90976	806.788	-4.4812	800.449	-7.26879	802.828	3.62426	797.279	-52.4238	796.484	5.07151	796.484	-38.8212
796.81	7.84834	836.361	0.755892	837.151	0.535568	837.151	10.489	838.727	3.89522	837.615	-27.4876	806.788	-33.5882	797.972	0	801.144	-1.27864	807.58	-22.3208	801.241	-62.6438	803.62	14.597	798.071	-17.4865	797.279	7.72982	797.279	14.9392
797.603	4.26989	837.151	-5.97446	837.938	1.67521	837.938	10.3763	839.516	-1.58162	838.404	-31.294	807.58	-19.6624	798.765	2.849	801.937	-5.65652	808.373	-13.6851	802.035	-40.5951	804.412	6.49868	798.864	25.7291	798.071	12.1697	798.071	27.5522
798.395	1.9127	837.938	-5.87755	838.727	-4.05101	838.727	10.2445	840.305	-6.50066	839.193	-46.0976	808.373	-0.51182	799.56	0.847	802.729	-4.41175	809.165	-22.3705	802.828	-15.3966	805.204	4.34911	799.656	4.50573	798.864	-6.99454	798.864	7.06122
799.19	2.93415	838.727	-1.29858	839.516	0	839.516	1.29959	841.094	-7.93871	839.982	-46.83	809.165	9.91652	800.352	21.637	803.521	0.711299	809.957	-14.5728	803.62	26.8725	805.996	-3.24934	800.449	-31.1825	799.656	-14.5453	799.656	-28.4413
799.982	3.96683	839.516	-1.31797	840.305	-0.379879	840.305	-8.02002	841.883	-5.55921	840.771	-48.9717	809.957	-16.1437	801.144	-30.877	804.315	3.55649	810.748	-9.16836	804.412	90.5295	806.788	44.7159	801.241	-100.95	800.449	10.9254	800.449	-43.3288
800.775	4.15316	840.305	-0.0193819	841.094	0.516885	841.094	2.14696	842.669	-0.903784	841.56	-43.8005	810.748	-2.04728	801.937	-6.468	805.107	5.23313	811.54	-2.11632	805.204	74.0536	807.58	10.4479	802.035	-84.4646	801.241	2.95995	801.241	-52.6128
801.567	-0.0336742	841.094	-1.39549	841.883	-4.32969	841.883	0	843.458	9.49209	842.347	-23.2763	811.54	8.23178	802.729	8.316	805.899	26.606	812.331	6.63303	805.996	103.878	808.373	6.17374	802.828	-75.5604	802.035	9.26635	802.035	-106.735
802.359	-0.785732	841.883	-5.83878	842.669	-3.77855	842.669	1.2191	844.247	7.07494	843.135	-25.296	812.331	-8.1678	803.521	-5.0435	806.691	1.75284	813.122	24.2099	806.788	173.504	809.165	23.4202	803.62	-51.4762	802.828	0.47133	802.828	-119.141
803.152	0.0942879	842.669	-11.8084	843.458	-4.96957	843.458	2.20111	845.035	4.72604	843.924	-24.0864	813.122	9.74591	804.315	-0.0385	807.483	-0.143953	813.914	35.9135	807.58	219.628	809.957	7.14854	804.412	-43.2872	803.62	-21.8697	803.62	-141.855
803.944	0.417561	843.458	-9.27906	844.247	-3.71939	844.247	6.8536	845.821	0.830822	844.713	-23.0987	813.914	-1.45016	805.107	-38.5	808.275	6.0291	814.705	22.5054	808.373	186.235	810.748	-8.47327	805.204	14.4291	804.412	-42.382	804.412	-154.737
804.738	-0.886755	844.247	-0.605683	845.035	-0.695927	845.035	5.69158	846.61	-6.57597	845.501	-11.7075	814.705	36.5525	805.899	-12.1275	809.066	5.87668	815.496	23.7696	809.165	90.0229	811.54	-12.7724	805.996	43.0011	805.204	-45.3797	805.204	-156.236
805.53	-3.09803	845.035	0.460319	845.821	1.58491	845.821	4.37735	847.398	-8.36236	846.287	0.216394	815.496	5.35279	806.691	0	809.858	2.59963	816.287	24.9129	809.957	41.8066	812.331	-24.1451	806.788	20.8122	805.996	-37.5745	805.996	-112.266
806.322	-4.31479	845.821	-0.872183	846.61	1.25173	846.61	11.9173	848.186	-22.6464	847.076	-0.288526	816.287	10.8762	807.483	3.8885	810.649	4.82667	817.078	33.0444	810.748	27.0707	813.122	-3.12436	807.58	-59.6652	806.788	-31.9279	806.788	-99.7978
807.114	-2.41557	846.61	9.33236	847.398	1.65497	847.398	3.99098	848.973	-32.1432	847.864	-3.22927	817.078	-6.12052	808.275	0	811.441	-4.36094	817.869	33.9819	811.54	51.278	813.914	46.8654	808.373	-159.667	807.58	-37.6122	807.58	-67.2625
807.905	0.152657	847.398	-1.46818	848.186	1.6394	848.186	0.629308	849.761	-20.7564	848.652	-14.4152	817.869	-16.6342	809.066	46.2	812.232	-7.86663	818.66	36.2189	812.331	71.0579	814.705	62.1373	809.165	-60.13	808.373	-27.29	808.373	-40.5374
808.697	2.40659	848.186	1.50694	848.973	0.066946	848.973	13.0296	850.549	-12.3894	849.438	-29.4185	818.66	-23.0532	809.858	0	813.026	2.41334	819.45	15.3682	813.122	130.486	815.496	95.4305	809.957	-80.531	809.165	-26.4793	809.165	-56.5828
809.489	7.95835	848.973	3.13502	849.761	2.28083	849.761	7.09069	851.337	-3.33506	850.227	-16.4071	819.45	-38.3439	810.649	-3.9655	813.817	8.67954	820.241	11.1639	813.914	167.733	816.287	91.3314	810.748	-65.4046	809.957	-28.7889	809.957	-40.9819
810.28	8.58244	849.761	-0.828574	850.549	0.247544	850.549	-6.06916	852.123	2.67134	851.015	0.943258	820.241	-3.45479	811.441	-16.2085	814.608	0	821.032	0.639157	814.705	200.927	817.078	53.864	811.54	-44.3063	810.748	-46.3695	810.748	-41.84
811.072	8.73061	850.549	-0.83342	851.337	-0.566705	851.337	-9.51133	852.911	3.37978	851.802	20.6352	821.032	20.5581	812.232	14.9765	815.399	0	821.822	-24.9911	815.496	235.619	817.869	0	812.331	-6.52616	811.54	-48.6507	811.54	-31.4601
811.863	9.16613	851.337	-3.78431	852.123	-6.71172	852.123	-10.4655	853.698	2.97731	852.588	23.0932	821.822	0	813.026	0.3465	816.19	-6.46943	822.613	-31.3116	816.287	241.302	818.66	-52.9892	813.122	3.87993	812.331	-33.4645	812.331	-18.8471
812.655	12.758	852.123	-0.368255	852.911	-7.61627	852.911	-13.1774	854.486	1.85699	853.376	23.7091	822.613	-19.4278	813.817	30.3765	816.981	3.51416	823.403	-16.1352	817.078	214.804	819.45	-97.5051	813.914	32.1838	813.122	-10.6332	813.122	-22.3829
813.446	11.4919	852.911	3.53719	853.698	-6.14346	853.698	-12.9315	855.272	5.2862	854.164	29.0412	823.403	-67.9015	814.608	0	817.772	6.86742	824.194	-17.7047	817.869	207.469	820.241	-85.3826	814.705	58.5387	813.914	17.7597	813.914	-6.50294
814.237	10.1786	853.698	2.21922	854.486	-2.9285	854.486	-11.869	856.059	4.44831	854.95	27.2102	824.194	-68.6906	815.399	17.5945	818.563	1.87139	824.984	-4.70136	818.66	210.244	821.032	-25.6198	815.496	-7.81351	814.705	24.2641	814.705	-4.40421
815.028	9.33899	854.486	0.295573	855.272	0.756645	855.272	-12.4457	856.847	10.0875	855.737	36.493	824.984	-58.5608	816.19	0.616	819.354	-18.3329	825.774	-7.27929	819.45	189.737	821.822	-1.39971	816.287	101.897	815.496	29.9578	815.496	-15.1873
815.819	4.72337	855.272	1.5457	856.059	3.63065	856.059	-5.84525	857.632	-0.167106	856.525	38.0577	825.774	-34.0787	816.981	-3.2725	820.145	-0.66896	826.564	-32.384	820.241	208.702	822.613	-2.9494	817.078	96.015	816.287	15.9592	816.287	-27.4074
816.612	6.29708	856.059	0.237428	856.847	2.18898	856.847	5.17789	858.419	-11.2385	857.31	27.7151	826.564	-13.286	817.772	1.9635	820.935	-4.53876	827.354	-35.3738	821.032	117.336	823.403	51.5645	817.869	73.8082	817.078	1.44227	817.078	-20.3669
817.403	6.34198	856.847	-7.0986	857.632	0	857.632	6.26527	859.207	-0.209471	858.097	16.2407	827.354	-1.36485	818.563	-2.849	821.726	4.18311	828.144	-17.1365	821.822	138.548	824.194	25.4698	818.66	36.1531	817.869	-9.72826	817.869	-51.7237
818.194	6.10851	857.632	-10.4274	858.419	-0.415688	858.419	3.15093	859.992	10.8948	858.885	4.51654	828.144	-3.54009	819.354	27.027	822.516	7.32468	828.934	-1.72572	822.613	165.442	824.984	0	819.45	33.0957	818.66	-9.37947	818.66	-77.508
818.985	8.57122	858.419	-2.19984	859.207	-2.69341	859.207	-2.88164	860.779	9.98634	859.67	-2.40253	828.934	2.04728	820.145	0	823.307	-0.169357	829.724	12.8471	823.403	128.503	825.774	-64.2619	820.241	7.83139	819.45	-8.27656	819.45	-86.6576
819.776	12.3809	859.207	-2.15623	859.992	1.97257	859.992	2.51577	861.564	18.6853	860.457	2.09736	829.724	-2.13258	820.935	1.078	824.097	-1.55808	830.514	35.736	824.194	66.9389	826.564	-106.578	821.032	-6.29372	820.241	7.12651	820.241	-90.5345
820.566	11.9117	859.992	2.13685	860.779	2.90826	860.779	0.974695	862.351	35.7583	861.244	12.0071	830.514	30.1547	821.726	14.861	824.887	0.0338714	831.302	39.0099	824.984	-0.550666	827.354	-5.04897	821.822	-0.429117	821.032	-0.612729	821.032	-58.6195
821.355	9.19756	860.779	3.35791	861.564	1.53509	861.564	5.67694	863.138	38.9733	862.029	8.44493	831.302	31.1357	822.516	-12.8975	825.678	-1.87139	832.091	35.4306	825.774	-1.56389	828.144	4.04917	822.613	-38.2093	821.822	-27.1863	821.822	-58.6298
822.146	6.39811	861.564	3.96843	862.351	0.11988	862.351	13.4906	863.923	41.5176	862.816	-0.50492	832.091	26.8919	823.307	7.9695	826.466	-18.9849	832.881	28.684	826.564	30.4849	828.934	10.1229	823.403	-27.4277	822.613	-36.6884	822.613	-59.9635
822.936	2.13046	862.351	1.78798	863.138	1.11473	863.138	15.6873	864.71	31.7289	863.603	-11.7186	832.881	20.3449	824.097	-16.3625	827.256	-9.86504	833.67	16.8098	827.354	27.9738	829.724	4.4241	824.194	-19.0242	823.403	-41.1189	823.403	-92.199
823.727	0.347967	863.138	1.72499	863.923	0.398562	863.923	11.3817	865.497	11.6339	864.388	-20.1025	833.67	1.70607	824.887	1.771	828.046	-5.0553	834.46	11.448	828.144	32.7536	830.514	-2.97439	824.984	-12.9629	824.194	-54.58	824.194	-89.3353
824.517	1.61636	863.923	10.1367	864.71	2.52993	864.71	-0.251723	866.281	-2.79138	865.175	-34.3457	834.46	-18.6175	825.678	0.077	828.836	-2.76898	835.249	6.64013	828.934	36.1677	831.302	-0.799837	825.774	-31.0574	824.984	-38.3663	824.984	-77.9629
825.307	3.90172	864.71	7.29727	865.497	2.02083	865.497	1.10495	867.068	-32.0043	865.962	-26.4168	835.249	-5.97124	826.466	-1.771	829.626	3.62424	836.039	-15.3043	829.724	58.3706	832.091	19.3461	826.564	-11.908	825.774	-19.1643	825.774	-87.7638
826.097	5.62809	865.497	1.95272	866.281	-0.952812	866.281	0.0790294	867.784	-14.0016	866.746	-3.83961	836.039	37.3842	827.256	8.855	830.415	1.99841	836.828	-29.7705	830.514	54.9124	832.881	2.4745	827.354	20.097	826.564	-5.25062	826.564	-82.853
826.887	6.90996	866.281	-0.0145364	867.068	-2.97676	867.068	7.21509	868.576	-4.24826	867.533	-8.83888	836.828	-3.51876	828.046	-2.1175	831.205	-3.20931	837.615	-22.0438	831.302	45.0445	833.67	4.29912	828.144	47.7214	827.354	3.81778	827.354	-68.6065
827.677	5.7134	867.068	-4.3803	867.784	0	867.784	0.686385	869.366	-2.04764	868.317	-7.66258	837.615	-54.061	828.836	8.8165	831.995	-17.0627	838.404	4.78658	832.091	61.5645	834.46	23.5452	828.934	34.3651	828.144	-3.85548	828.144	-40.4237
828.467	5.57646	867.784	-1.70076	868.576	3.57616	868.576	0.300019	870.159	-6.25353	869.104	14.1156	838.404	-71.6548	829.626	-7.084	832.784	0.0423392	839.193	36.9859	832.881	89.3841	835.249	0.274944	829.724	28.0535	828.934	-12.2169	828.934	-44.0111
829.257	6.44301	868.576	0.0872183	869.366	11.3248	869.366	5.71938	870.951	-8.26586	869.433	22.2997	839.193	-88.225	830.415	0.077	833.574	8.8997	839.982	61.5367	833.67	58.7671	836.039	0	830.514	8.20686	829.724	1.56482	829.724	-48.0742
830.047	5.65727	869.366	-7.7479	870.159	0	870.159	5.78378	871.741	3.58219	870.225	48.55	839.982	-40.3272	831.205	3.9655	834.363	11.3808	840.771	67.0973	834.46	60.7495	836.828	-102.654	831.302	-9.2439	830.514	4.98667	830.514	-87.9706
830.837	5.61013	870.159	-5.64981	870.951	-6.36454	870.951	4.29686	872.533	16.9036	871.015	35.3611	840.771	4.15854	831.995	15.015	835.151	-2.99762	841.56	54.3142	835.249	58.1063	837.615	6.04877	832.091	-9.04722	831.302	-24.2075	831.302	-121.726
831.627	7.6014	870.951	0.247119	871.741	-4.41221	871.741	-0.743461	873.323	31.8231	871.807	36.9258	841.56	5.88593	832.784	3.8115	835.94	-13.7602	842.347	38.0938	836.039	66.7407	838.404	-4.74903	832.881	-3.3793	832.091	-17.8917	832.091	-134.215
832.414	8.54652	871.741	-0.295573	872.533	-2.46766	872.533	2.37234	874.115	72.0556	872.598	31.5326	842.347	7.69863	833.574	8.239	836.729	-6.76581	843.135	26.2339	836.828	59.2517	839.193	-10.6728	833.67	27.8747	832.881	-21.4172	832.881	-148.596
833.204	8.86306	872.533	-4.47721	873.323	-6.9001	873.323	4.45784	874.904	141.595	873.389	4.64416	843.135	43.5474	834.363	-1.5785	837.519	-0.19476	843.924	-0.518428	837.615	27.8196	839.982	-6.49868	834.46	78.1887	833.67	-34.869	833.67	-150.539
833.993	7.34772	873.323	-12.1573	874.115	-7.70034	874.115	2.55967	875.696	231.023	874.181	-15.9466	843.924	50.8408	835.151	-19.2115	838.308	13.0489	844.713	-1.02265	838.404	-8.23796	840.771	5.27392	835.249	107.297	834.46	-31.4849	834.46	-135.435
834.783	4.45622	874.115	0.373101	874.904	-7.89028	874.904	11.4871	876.488	351.163	874.971	-22.5494	844.713	-8.46636	835.94	-14.553	839.097	0.389521	845.501	11.7108	839.193	0.506613	841.56	-0.574883	836.039	77.7417	835.249	-41.939	835.249	-110.963
835.572	-1.47493	874.904	28.5689	875.696	-1.97101	875.696	42.7666	877.277	454.851	875.763	-7.73471	845.501	9.74591	836.729	6.8145	839.886	12.0328	846.287	31.4963	839.982	-16.4319	842.347	65.3617	836.828	12.4444	836.039	-65.9957	836.039	-96.2621
836.361	-0.246944	875.696	36.8013	876.488	5.25448	876.488	65.3822	878.069	548.43	876.552	20.391	846.287	23.4584	837.519	-11.935	840.673	19.0696	847.076	44.2581	840.771	-41.6083	843.135	122.4	837.615	-62.2399	836.828	-97.3297	836.828	-90.8137
837.151	0	876.488	40.9926	877.277	13.4997	877.277	107.758	878.858	582.632	877.344	28.5197	847.076	1.49281	838.308	1.0395	841.462	12.6256	847.864	42.0992	841.56	-71.2121	843.924	90.2816	838.404	-61.9002	837.615	-90.2692	837.615	-98.7123
837.938	-2.42904	877.277	39.946	878.069	26.3331	878.069	158.319	879.65	547.971	878.134	51.5019	847.864	-11.9638	839.097	16.5935	842.25	11.2284	848.652	36.3041	842.347	-69.7143	844.713	2.9494	839.193	-40.0331	838.404	-72.8865	838.404	-136.096
838.727	-1.09105	878.069	50.2862	878.858	44.4257	878.858	195.557	880.439	433.913	878.925	51.0746	848.652	2.62308	839.886	0	843.039	4.62344	849.438	14.026	843.135	-59.0094	845.501	0.849827	839.982	-13.392	839.193	-67.815	839.193	-143.406
839.516	-1.50187	878.858	70.4191	879.65	75.3656	879.65	211.945	881.23	322.086	879.714	36.1878	849.438	-1.57811	840.673	-10.01	843.828	-10.9405	850.227	2.90462	843.924	-31.8725	846.287	-46.2406	840.771	-20.687	839.982	-59.2462	839.982	-135.249
840.305	-2.19332	879.65	95.4169	880.439	95.9647	880.439	189.912	882.019	221.564	880.506	46.4971	850.227	0.0639775	841.462	-14.9765	844.614	-5.44482	851.015	-1.16469	844.713	23.7888	847.076	-49.9398	841.56	-28.7508	840.771	-51.4504	840.771	-109.04
841.094	-1.43003	880.439	116.238	881.23	105.669	881.23	140.817	882.811	107.59	881.297	107.271	851.015	14.6509	842.25	-21.483	845.403	1.52421	851.802	-5.12036	845.501	35.4849	847.864	-16.5216	842.347	-30.2885	841.56	-52.921	841.56	-93.0261
841.883	-2.69618	881.23	132.407	882.019	106.536	882.019	84.9009	883.6	51.8805	882.086	81.2644	851.802	-4.79832	843.039	-9.2785	846.191	-0.0677427	852.588	-3.96278	846.287	68.4588	848.652	0.274944	843.135	-67.8363	842.347	-54.9194	842.347	-87.9395
842.669	-5.06236	882.019	140.116	882.811	78.825	882.811	38.1683	884.391	5.90049	882.877	31.7157	852.588	-21.5604	843.828	0	846.979	-6.31701	853.376	13.33	847.076	30.1324	849.438	-0.224954	843.924	-96.1401	843.135	-58.1716	843.135	-88.3221
843.458	-5.93565	882.811	134.36	883.6	50.4679	883.6	4.40076	885.179	-10.5959	883.666	-25.4735	853.376	-28.7259	844.614	7.1225	847.766	4.35247	854.164	19.7074	847.864	34.1853	850.227	4.4241	844.713	-101.146	843.924	-67.3625	843.924	-94.2254
844.247	-4.96807	883.6	108.214	884.391	24.9895	884.391	-5.73987	885.97	8.80484	884.457	-29.241	854.164	27.0412	845.403	-4.8125	848.554	-0.143953	854.95	16.8951	848.652	31.5642	851.015	0.0317531	845.501	-109.854	844.713	-51.4127	844.713	-91.5994
845.035	-3.67049	884.391	94.0601	885.179	9.43627	885.179	-0.172694	886.759	19.1583	885.246	-32.8753	854.95	38.8344	846.191	-5.852	849.342	-5.79201	855.737	3.6716	849.438	6.38772	851.802	4.90865	846.287	-115.218	845.501	-28.9114	845.501	-76.1536
845.821	-3.39436	885.179	74.0241	885.97	1.81533	885.97	0.204891	887.55	7.18085	886.037	-32.3537	855.737	9.9805	846.979	4.3505	850.13	-12.0413	856.525	-5.73111	850.227	-38.5026	852.588	7.69732	847.076	-117.614	846.287	-12.1226	846.287	-51
846.61	-2.32801	885.97	50.7514	886.759	5.07232	886.759	2.51577	888.338	-42.8638	886.826	-21.4286	856.525	30.7732	847.766	34.342	850.916	-6.22387	857.31	-14.6438	874.971	6.717	853.376	9.6025	847.864	-82.4441	847.076	9.66227	847.076	-2.35719
847.398	-1.22574	886.759	34.616	887.55	1.61604	887.55	0.954206	889.129	-39.1216	887.616	3.01843	857.31	-25.6337	848.554	0	851.704	-6.5033	858.097	-8.14571	875.763	6.6123	854.164	10.5775	848.652	-103.828	847.864	20.9836	847.864	25.4431
848.186	-0.837366	887.55	21.8385	888.338	-0.945028	888.338	-3.86805	889.917	-54.7237	888.405	23.0155	858.097	-3.1349	849.342	-20.5205	852.492	11.5925	858.885	-10.6313	876.552	13.0261	854.95	12.3575	849.438	-137.997	848.652	18.7401	848.652	38.8936
848.973	-1.01472	888.338	15.1421	889.129	0.862513	889.129	-1.62303	890.706	-24.1574	889.193	55.1528	858.885	5.13953	850.13	-35.651	853.28	2.03228	859.67	-20.7584	877.344	10.55	855.737	12.6452	850.227	-120.189	849.438	19.5225	849.438	18.4956
849.761	-2.09454	889.129	15.7429	889.917	2.01305	889.917	0.452224	891.496	-28.528	889.984	68.2475	859.67	-4.49975	850.916	-0.6545	854.066	8.50171	860.457	-21.355	878.134	5.11797	856.525	12.0568	851.015	-62.2041	850.227	21.5021	850.227	13.926
850.549	-2.37516	889.917	5.88724	890.706	1.3685	890.706	-6.16136	892.284	0.0447185	890.772	55.2971	860.457	12.4969	851.704	17.633	854.853	18.6716	861.244	-12.4565	878.925	-3.64132	857.31	13.1813	851.802	-14.8224	851.015	17.5335	851.015	-6.07906
851.337	-1.63432	890.706	1.22106	891.496	-0.414131	891.496	2.78944	893.075	16.8306	891.563	29.4352	861.244	-1.27955	852.492	10.8185	855.641	0	862.029	-0.85221	879.714	-8.57165	858.097	13.9265	852.588	-20.7407	851.802	3.93089	851.802	-6.627
852.123	-1.0888	891.496	0.218046	892.284	0.647663	892.284	9.61524	893.863	8.36942	892.351	21.0402	862.029	25.4204	853.28	0	856.426	-18.2228	862.816	-1.19309	880.506	-8.85175	858.885	13.4147	853.376	-39.3894	852.588	9.77539	852.588	-14.5773
852.911	0.24021	892.284	3.12532	893.075	-14.602	893.075	4.39198	894.653	-21.0624	893.141	18.2548	862.816	4.54241	854.066	32.1475	857.214	-22.9225	863.603	0.97294	881.297	-4.78756	859.67	8.71528	854.164	-53.0854	853.376	-0.103693	853.376	-1.63349
853.698	1.46146	893.075	8.69761	893.863	-5.97843	893.863	0.674677	895.441	-19.1725	893.929	10.2149	863.603	20.7927	854.853	8.239	858.001	-24.2942	864.388	7.42843	882.086	-0.900132	860.457	4.44356	854.95	-98.0354	854.164	-1.4517	854.164	-13.2023
854.486	3.32028	893.863	13.5964	894.653	1.88227	894.653	0	896.229	4.01525	894.719	8.45603	864.388	35.6995	855.641	13.783	858.787	0	865.175	5.76662	882.877	3.17086	861.244	3.5993	855.737	-107.798	854.95	-13.8948	854.95	-34.0965
855.272	3.25518	894.653	-0.673519	895.441	2.15317	895.441	-2.28892	897.018	36.1514	895.507	6.96901	865.175	14.1817	856.426	18.9035	859.574	0	865.962	0.213052	883.666	3.15454	862.029	5.77159	856.525	-82.3726	855.737	-17.9483	855.737	-42.6878
856.059	1.61412	895.441	0.954556	896.229	-2.26059	896.229	0.655651	897.806	36.8763	896.295	-24.153	865.962	31.8608	857.214	10.6645	860.361	4.73352	866.746	-4.79368	884.457	8.88303	862.816	5.65391	857.31	-16.8071	856.525	-22.4259	856.525	-35.761
856.847	0.166126	896.229	-2.56325	897.018	4.27831	897.018	-3.42022	898.596	50.7108	897.085	3.00178	866.746	32.6712	858.001	18.5955	861.146	0.855252	867.533	-2.88331	885.246	9.76276	863.603	4.84701	858.097	-0.0178799	857.31	-1.61195	857.31	-21.3284
857.632	-0.464705	897.018	-15.8592	897.806	0.67413	897.806	-5.45888	899.384	40.9833	897.873	14.6982	867.533	-2.72971	858.787	2.618	861.933	-4.63191	868.317	3.33072	886.037	6.78498	864.388	5.25793	858.885	-60.1658	858.097	11.8115	858.097	6.51327
858.419	2.06311	897.806	7.99501	898.596	1.33425	898.596	-0.942498	900.171	-0.26125	898.662	16.0076	868.317	-22.1149	859.574	-6.314	862.72	0.660492	869.104	7.13726	886.826	3.19805	865.175	6.56168	859.67	-77.2411	858.885	-3.09193	858.885	3.39104
859.207	6.6024	898.596	2.3016	899.384	0	899.384	8.03465	900.961	39.1852	899.45	21.3232	869.104	-3.32683	860.361	2.6565	863.505	-1.8968	869.433	6.76086	887.616	-0.0924607	865.962	6.86053	860.457	-85.0188	859.67	-0.254518	859.67	-14.2258
859.992	9.25817	899.384	6.18281	900.171	-2.64826	900.171	0	901.748	38.6603	900.238	49.8928	869.433	3.66805	861.146	-53.4765	864.292	0	870.225	1.98849	888.405	-4.69782	866.746	6.85119	861.244	-90.6152	860.457	10.1525	860.457	-19.8293
860.779	9.0696	900.171	0.242273	900.961	-4.20358	900.961	0	902.538	51.0826	901.027	82.3464	870.225	-65.1931	861.933	5.929	865.077	4.62344	871.015	7.37872	889.193	-4.71414	867.533	5.99386	862.029	-72.2884	861.244	8.79502	861.244	-39.4208
861.564	7.04016	900.961	-1.72014	901.748	-0.319161	901.748	-0.96006	903.325	86.6268	901.815	87.4788	871.015	-27.8729	862.72	-4.543	865.863	1.28711	871.807	12.5204	889.984	-4.69374	868.317	3.94859	862.816	-48.079	862.029	0.575023	862.029	-76.7326
862.351	3.91744	901.748	-7.84965	902.538	-0.750418	902.538	-4.38759	904.112	93.3957	902.604	53.9821	871.807	3.54009	863.505	-15.477	866.65	-0.736702	872.598	21.8876	890.772	-3.64812	869.104	1.88464	863.603	-22.618	862.816	-8.80445	862.816	-109.278
863.138	1.06186	902.538	0	903.325	-0.0093413	903.325	1.4679	904.901	90.4561	903.391	58.027	872.598	-1.68474	864.292	-32.7635	867.435	9.31463	873.389	44.8973	891.563	-1.18567	869.433	1.32055	864.388	-6.27584	863.603	-8.34255	863.603	-121.653
863.923	2.04515	903.325	2.44696	904.112	0.0326945	904.112	1.84695	905.688	56.6371	904.178	48.0507	873.389	36.6591	865.077	-21.6755	868.221	14.7595	874.181	81.7553	892.351	-2.27616	870.225	2.73637	865.175	11.5325	864.388	6.0236	864.388	-119.606
864.71	-0.228985	904.112	1.37611	904.901	0	904.901	0	906.475	44.8715	904.968	33.014	874.181	0.51182	865.863	-3.0415	869.006	0.0592749	874.971	123.364	893.141	-3.5475	871.015	1.54843	865.962	38.4775	865.175	9.08725	865.175	-120.061
865.497	-2.26515	904.901	5.00536	905.688	1.36539	905.688	-1.27618	907.264	30.6392	905.755	3.54554	874.971	-0.149281	866.65	-1.617	869.064	0	875.763	175.846	893.929	-5.31241	871.807	-0.851729	866.746	54.3191	865.962	7.77695	865.962	-114.944
866.281	-4.07234	905.688	6.89994	906.475	10.8966	906.475	-1.43424	908.051	20.6293	906.542	-26.1393	875.763	-0.895686	867.435	0	869.855	-7.46017	876.552	215.843	894.719	-5.21043	872.598	-3.39384	867.533	42.3932	866.746	-4.98667	866.746	-105.505
867.068	-5.45074	906.475	-0.251964	907.264	1.18167	907.264	-7.00288	908.838	2.45716	907.331	-32.7921	876.552	13.2647	868.221	-59.3285	870.647	0	877.344	246.211	895.507	-2.16195	873.389	-3.05763	868.317	31.558	867.533	-18.7967	867.533	-96.076
867.784	-6.78873	907.264	-5.77095	908.051	-0.342514	908.051	-1.35667	909.627	-16.5741	908.118	-23.5537	877.344	3.62539	869.006	2.618	871.437	0.533474	878.134	214.281	896.295	1.0429	874.181	0.207329	869.104	53.9078	868.317	-29.7221	868.317	-86.1923
868.576	-5.33849	908.051	-3.23192	908.838	-2.68562	908.838	0.319044	910.413	-29.2553	908.904	2.55234	878.134	-26.9985	869.064	18.6725	872.229	0	878.925	154.861	897.085	8.67091	874.971	4.59112	869.433	70.9474	869.104	-34.3977	869.104	-52.7575
869.366	-4.10601	908.838	-5.14588	909.627	-4.95712	909.627	0.564914	911.2	-24.8352	909.693	41.3147	878.925	-15.9731	869.855	62.0235	873.021	16.7071	879.714	109.921	897.873	10.6751	875.763	4.05319	870.225	37.3153	869.433	-35.067	869.433	-29.4648
870.159	-1.72188	909.627	0.799501	910.413	0	910.413	-1.82499	911.987	-19.0077	910.48	85.5812	879.714	0	870.647	28.6055	873.811	0.245567	880.506	69.1497	898.662	11.4121	876.552	3.27991	871.015	4.45209	870.225	-34.7559	870.225	10.9485
870.951	0.103268	910.413	1.53117	911.2	0.806465	911.2	-6.56529	912.775	-14.7995	911.266	107.254	880.506	-14.267	871.437	-5.621	874.603	0	881.297	46.623	899.45	9.62135	877.344	1.52228	871.807	-0.590036	871.015	-21.0967	871.015	31.181
871.741	-0.121227	911.2	2.09324	911.987	0.093413	911.987	0	913.561	-12.2223	912.055	77.8188	881.297	-2.43115	872.229	0	875.392	12.2022	882.086	31.4181	900.238	7.50971	878.134	2.21524	872.598	-1.48403	871.807	-0.377064	871.807	34.2826
872.533	-1.28187	911.987	0.397328	912.775	0.151018	912.775	0	914.348	-36.2761	912.841	3.00733	882.086	-51.3526	873.021	-8.393	876.184	12.905	882.877	22.612	901.027	6.92911	878.925	1.95748	873.389	-50.2067	872.598	34.1432	872.598	9.74923
873.323	-0.215515	912.775	14.2311	913.561	0.0217964	913.561	0	915.136	26.864	913.628	-46.8855	882.877	60.2029	873.811	-41.6185	876.974	-11.9058	883.666	15.3256	901.815	6.83665	879.714	4.31281	874.181	-72.7175	873.389	23.6514	873.389	-19.3331
874.115	0.846346	913.561	14.3038	914.348	1.53042	914.348	-2.0533	915.922	23.8491	914.414	12.7118	883.666	-101.404	874.603	-16.401	877.765	19.7216	884.457	23.3505	902.604	8.19637	880.506	2.31237	874.971	-64.6894	874.181	46.7183	874.181	-35.151
874.904	0.576952	914.348	10.4081	915.136	-1.94455	915.136	0	916.708	2.25475	915.202	59.3864	884.457	-65.8116	875.392	-12.859	878.555	-0.516538	885.246	26.106	903.391	5.67545	881.297	1.21596	875.763	-79.4045	874.971	24.2358	874.971	-20.9769
875.696	-0.20429	915.136	6.20219	915.922	0	915.922	0.660042	917.494	10.2264	915.989	68.4417	885.246	-113.006	876.184	11.0495	879.346	0.719767	886.037	32.2277	904.178	6.73467	882.086	1.29254	876.552	-45.5222	875.763	27.3466	875.763	-45.4792
876.488	-4.06336	915.922	4.49174	916.708	-3.63999	916.708	-2.2699	918.282	12.846	916.775	83.3063	886.037	-3.30551	876.974	-63.91	880.137	1.67663	886.826	16.8738	904.968	6.22478	882.877	-4.36698	877.344	-48.7048	876.552	32.0505	876.552	-47.764
877.277	-6.01198	916.708	-0.688056	917.494	-1.58179	917.494	0.190256	919.068	15.3408	917.561	50.7417	886.826	45.1681	877.765	-6.776	880.927	12.6002	887.616	1.59079	905.755	5.95692	883.666	-2.57013	878.134	-9.02934	877.344	30.3442	877.344	-39.0176
878.069	-0.612871	917.494	-0.431246	918.282	0.678801	918.282	-0.856151	919.854	8.40708	918.349	90.6415	887.616	30.0055	878.555	6.776	881.718	0.762106	888.405	-9.54475	906.542	-0.14277	884.457	1.97056	878.925	-18.4163	878.134	65.9014	878.134	-44.7969
878.858	10.8476	918.282	2.81521	919.068	0	919.068	0.607355	920.64	-0.473075	919.135	68.3751	888.405	24.9726	879.346	20.9055	882.507	-22.8801	889.193	-2.024	907.331	-5.35456	885.246	5.96771	879.714	1.50191	878.925	52.5439	878.925	-23.882
879.65	24.8179	919.068	-0.0484546	919.854	4.86059	919.854	0	921.426	7.80926	919.92	74.5562	889.193	2.62308	880.137	13.937	883.298	-12.253	889.984	-10.5106	908.118	-6.4301	886.037	4.67144	880.506	6.79435	879.714	30.7779	879.714	8.8808
880.439	42.0546	919.854	6.1392	920.64	-0.854729	920.64	4.62907	922.213	17.2307	920.706	68.1254	889.984	-72.2733	880.927	-14.2835	884.087	-6.04604	890.772	-14.2461	908.904	-5.07038	886.826	11.065	881.297	-0.679435	880.506	-12.3866	880.506	-54.6288
881.23	59.2959	920.64	1.18229	921.426	0.997962	921.426	-0.244406	922.999	9.34381	921.494	40.9707	890.772	-46.3624	881.718	16.555	884.878	5.06377	891.563	-7.02363	909.693	-2.36863	887.616	14.231	882.086	-4.29117	881.297	35.2461	881.297	-57.11
882.019	76.6314	921.426	2.32098	922.213	-3.64778	922.213	-3.1202	923.784	23.7973	922.28	31.9487	891.563	1.70607	882.507	-15.3615	885.667	0.355649	892.351	-1.73993	910.48	-1.10681	888.405	17.0607	882.877	2.18135	882.086	30.1651	882.086	-42.8429
882.811	79.8978	922.213	-3.88122	922.999	-0.93413	922.999	-1.60839	924.57	22.4016	923.065	26.7164	892.351	35.998	883.298	-31.031	886.458	3.25165	893.141	0.184645	911.266	-3.08112	889.193	15.3423	883.666	16.1455	882.877	45.7379	882.877	-27.3764
883.6	67.6942	922.999	0.407019	923.784	0.331616	923.784	1.00543	925.355	24.2821	923.851	33.7409	893.141	-0.0426517	884.087	-21.5985	887.246	-8.57793	893.929	4.97833	912.055	-9.48402	889.984	8.96931	884.457	34.6333	883.666	29.2508	883.666	-2.75005
884.391	47.6895	923.784	0.218046	924.57	-2.24503	924.57	1.50009	926.142	1.238	924.638	39.6501	893.929	14.4803	884.878	20.5205	888.037	-5.68192	894.719	-5.23399	912.841	-15.0969	890.772	0.694832	885.246	22.1353	884.457	34.6145	884.457	16.004
885.179	27.3637	924.57	-1.27436	925.355	4.90885	925.355	-2.59626	926.928	-46.7402	925.423	39.983	894.719	22.9466	885.667	-28.182	888.826	0.677427	895.507	13.9194	913.628	-16.0338	891.563	-3.58436	886.037	17.2004	885.246	54.7686	885.246	40.7338
885.97	10.7376	925.355	0.581456	926.142	1.47281	926.142	-4.81055	927.713	-47.9947	926.209	34.3623	895.507	4.99025	886.458	2.695	889.614	-0.702831	896.295	20.2613	914.414	-11.9152	892.351	-2.22085	886.826	8.15322	886.037	99.988	886.037	70.5915
886.759	7.76753	926.142	0.0193819	926.928	-1.00575	926.928	-2.1016	928.498	-66.4846	926.994	30.7336	896.295	28.2567	887.246	38.2305	890.404	-16.6393	897.085	19.331	915.202	-7.89723	893.141	-4.43609	887.616	-23.2617	886.826	113.713	886.826	30.9536
887.55	7.55201	926.928	0.678365	927.713	0	927.713	0	929.283	-54.3165	927.779	20.391	897.085	23.0106	888.037	0	891.193	0.516538	897.873	-18.7628	915.989	-1.80434	893.929	3.01654	888.405	-51.0471	887.616	107.605	887.616	27.883
888.338	11.7411	927.713	1.36642	928.498	-1.37784	928.498	-11.9788	930.068	-42.2213	928.564	17.6889	897.873	-0.25591	888.826	-19.5195	891.983	8.23074	898.662	-25.8007	916.775	-0.0231152	894.719	3.10433	889.193	-71.2334	888.405	79.2495	888.405	-2.86377
889.129	12.2619	928.498	0.566919	929.283	-0.786226	929.283	-2.09135	930.855	-37.1163	929.351	15.3585	898.662	-8.35973	889.614	-21.637	892.771	1.55808	899.45	-1.66891	917.561	1.15848	895.507	3.14916	889.984	-31.111	889.193	43.0796	889.193	12.2098
889.917	13.5213	929.283	-6.04714	930.068	-0.857843	930.068	1.27032	931.64	-24.687	930.136	-2.95739	899.45	0.831708	890.404	-15.5925	893.562	-3.07383	900.238	1.34933	918.349	1.54464	896.295	4.59859	890.772	-87.4326	889.984	13.8288	889.984	24.1818
890.706	15.4273	930.068	-7.71882	930.855	-0.815807	930.855	7.01605	932.424	1.79345	930.921	-24.1751	900.238	-24.5247	891.193	-16.632	894.35	0.254035	901.027	6.23533	919.135	-0.988514	897.085	10.3403	891.563	-141.501	890.772	-13.0558	890.772	17.0586
891.496	13.3552	930.855	-13.0537	931.64	-0.256886	931.64	6.54627	933.209	28.9446	931.706	-30.7003	901.027	-18.4255	891.983	5.467	895.138	-28.6467	901.815	19.3949	919.92	-4.92761	897.873	8.71715	892.351	-154.411	891.563	24.6506	891.563	10.7727
892.284	10.1876	931.64	-7.77697	932.424	-0.157245	932.424	5.22179	933.994	41.0374	932.491	-17.0008	901.815	10.9615	892.771	44.7755	895.928	-24.0656	902.604	0.454512	920.706	-10.9783	898.662	0.0410922	893.141	-133.402	892.351	26.847	892.351	13.3057
893.075	4.26316	932.424	1.59416	933.209	-6.62765	933.209	4.27051	934.778	25.2801	933.275	3.08501	902.604	4.99025	893.562	0.616	896.716	-4.0815	903.391	-8.49369	921.494	-18.9667	899.45	0.657475	893.929	-80.2985	893.141	21.0213	893.141	13.0989
893.863	0.211025	933.209	-0.0823729	933.994	-0.292694	933.994	-2.96506	935.563	2.76078	934.062	42.258	903.391	21.4538	894.35	13.783	897.505	15.8687	904.178	8.96241	922.28	-21.9567	900.238	-0.140087	894.719	-69.6243	893.929	11.3591	893.929	13.0679
894.653	-1.43228	933.994	-0.562074	934.778	0	934.778	2.72944	936.349	0.442478	934.846	67.5206	904.178	-18.1483	895.138	-14.2065	898.293	-0.0592749	904.968	24.8348	923.065	-23.538	901.027	7.21355	895.507	5.34608	894.719	15.9592	894.719	-4.99351
895.441	-0.087553	934.778	-4.50628	935.563	-8.50836	935.563	4.3832	937.133	-1.16739	935.631	28.0869	904.968	-12.6036	895.928	19.2115	899.081	8.40857	905.755	25.8859	923.851	-23.6631	901.815	9.97793	896.295	41.3919	895.507	35.1989	895.507	-0.113724
896.229	5.13645	935.563	0.1066	936.349	0.845387	936.349	-1.37423	937.918	50.7037	936.415	2.48576	905.755	23.9489	896.716	-5.313	899.87	1.33792	906.542	26.5676	924.638	-20.7221	902.604	7.61327	897.085	94.2806	896.295	46.0961	896.295	-12.003
897.018	11.4605	936.349	-0.673519	937.133	-1.47437	937.133	-6.10721	938.702	59.5132	937.2	-12.3955	906.542	-10.0231	897.505	-4.6585	900.658	3.53109	907.331	0	925.423	-15.2519	903.391	4.8246	897.873	85.8592	897.085	44.8989	897.085	-5.06588
897.806	13.2228	937.133	-0.83342	937.918	3.53879	937.918	0.36295	939.486	77.1323	937.984	-19.3201	907.331	-4.54241	898.293	-1.5015	901.447	12.2953	908.118	4.55932	926.209	-7.06916	904.178	-0.685493	898.662	67.0317	897.873	21.898	897.873	22.4656
898.596	11.4897	937.918	0.83342	938.702	4.5928	938.702	-4.46955	940.27	76.1579	938.768	-13.7327	908.118	-53.5919	899.081	0.1155	902.235	23.3035	908.904	2.0453	926.994	-2.43253	904.968	-0.933914	899.45	15.5197	898.662	36.9052	898.662	4.98317
899.384	9.23123	938.702	3.43059	939.486	0.376766	939.486	0	941.054	87.9189	939.552	1.96974	908.904	-57.8357	899.87	0.5005	903.022	0.719767	909.693	0.596547	927.779	-2.21634	905.755	1.25892	900.238	13.5172	899.45	36.1039	899.45	-0.0103385
900.171	5.08032	939.486	9.48257	940.27	-2.13449	940.27	-5.66377	941.838	68.1957	940.336	36.4098	909.693	-7.03753	900.658	-1.001	903.811	-5.69039	910.48	-0.276968	928.564	-2.6732	906.542	4.05319	901.027	-0.250318	900.238	32.0976	900.238	20.522
900.961	1.78249	940.27	0.411864	941.054	0.418801	941.054	0	942.622	56.9619	941.12	42.1248	910.48	3.07092	901.447	-45.892	904.598	0.973802	911.266	-0.262765	929.351	2.82005	907.331	3.45548	901.815	-11.908	901.027	42.2689	901.027	-16.7588
901.748	-0.246944	941.054	2.32582	941.838	1.81221	941.838	-0.750779	943.406	44.6267	941.906	44.1722	911.266	-25.591	902.235	1.54	905.386	23.2273	912.055	-6.32056	930.136	3.32043	908.118	0.196122	902.604	-21.7956	901.815	66.1465	901.815	1.61281
902.538	-1.41656	941.838	3.54688	942.622	7.07448	942.622	2.35332	944.189	40.3243	942.69	16.3073	912.055	-4.64903	903.022	-24.5245	906.175	32.4234	912.841	-5.92996	930.921	3.37617	908.904	7.15938	903.391	-62.7941	902.604	92.2016	902.604	11.4448
903.325	-1.30432	942.622	4.77278	943.406	0.742633	943.406	3.45534	944.973	13.2061	943.474	11.2026	912.841	0.76773	903.811	2.079	906.962	46.0481	913.628	-5.54647	931.706	4.43947	909.693	8.13999	904.178	-50.8861	903.391	93.2291	903.391	-56.7482
904.112	-0.983288	943.406	5.85817	944.189	-0.16503	944.189	-1.17959	945.757	20.3422	944.257	8.7501	913.628	51.6299	904.598	-38.2305	907.749	29.9846	914.414	16.2062	932.491	-2.59026	910.48	3.92804	904.968	-1.84163	904.178	73.6406	904.178	-18.8678
904.901	-1.30881	944.189	-1.35188	944.973	-1.1085	944.973	-0.958597	946.54	13.8674	945.041	5.76497	914.414	0.447843	905.386	-24.255	908.537	0	915.202	28.059	933.275	-11.1034	911.266	-2.7812	905.755	60.4519	904.968	51.5164	904.968	-72.8143
905.688	-4.46071	944.973	3.95874	945.757	0	945.757	8.14881	947.324	-4.36829	945.825	-11.8573	915.202	5.16086	906.175	28.028	909.324	-13.6671	915.989	29.8842	934.062	-13.9534	912.055	-10.5644	906.542	88.4875	905.755	18.2782	905.755	-106.776
906.475	-5.22175	945.757	2.10778	946.54	0	946.54	-0.0351242	948.107	-3.88109	946.608	-23.365	915.989	-3.09225	906.962	21.2905	910.111	-3.38714	916.775	10.397	934.846	-13.2532	912.841	-11.7412	907.331	104.061	906.542	-16.2986	906.542	-134.018
907.264	-4.7795	946.54	0.799501	947.324	11.3201	947.324	0	948.89	-6.14291	947.392	-17.3448	916.775	0.533146	907.749	-6.468	910.899	-8.51018	917.561	0.774091	935.631	-12.9078	913.628	-7.14257	908.118	55.0164	907.331	-37.4802	907.331	-63.9231
908.051	-3.14293	947.324	11.7696	948.107	-0.052934	948.107	-4.88519	949.674	26.8405	949.742	4.3998	917.561	4.56373	908.537	-26.257	911.686	1.60889	918.349	-2.05951	936.415	-12.7473	914.414	-2.89513	908.904	27.3026	908.118	-64.7702	908.118	50.5451
908.838	-3.65927	948.107	0	948.89	0.476406	948.89	-22.3097	949.674	-1.58495	950.525	1.76228	918.349	-6.31245	909.324	11.8195	912.473	16.2667	919.135	2.74128	937.2	-8.91838	915.202	-2.54772	909.693	-1.46615	908.904	-52.2705	908.904	117.28
909.627	-3.03517	948.89	-1.44879	949.674	-5.27939	949.674	-0.949816	950.457	-0.192957	951.308	0.0622055	919.135	4.71301	910.111	17.787	913.259	10.3223	919.92	-1.47006	937.984	-8.5091	915.989	4.79098	910.48	-55.1416	909.693	2.57346	909.693	127.619
910.413	-0.823897	949.674	-0.959402	949.674	-1.31155	949.674	-2.84076	951.24	-0.166612	952.091	-0.0740246	919.92	-19.6838	910.899	1.848	914.047	-3.39561	920.706	-32.1212	938.768	-10.6044	916.775	10.2357	911.266	-103.9	910.48	5.89163	910.48	93.1191
911.2	-0.65777	950.457	0.915793	950.457	-0.0110146	950.457	-1.41636	952.023	1.52984	952.874	1.76166	920.706	-35.3156	911.686	33.3795	914.834	-8.86583	921.494	-16.0357	939.552	-8.93605	917.561	10.7269	912.055	-126.661	911.266	-13.2821	911.266	44.9933
911.987	-0.383886	951.24	4.15741	951.24	0.775099	951.24	-0.100019	952.806	2.84138	953.657	3.94943	921.494	43.4834	912.473	2.233	915.62	5.91902	922.28	2.31517	940.336	-5.38176	918.349	8.15307	912.841	-107.404	912.055	-24.9051	912.055	-33.135
912.775	-2.50536	952.023	7.79151	952.023	1.00375	952.023	0.618033	953.589	3.15951	954.44	3.909	922.28	16.3143	913.259	-52.0905	916.408	-1.83752	923.065	-0.028407	941.12	-3.46728	919.135	8.71342	913.628	-53.7112	912.841	-17.5241	912.841	-73.4966
913.561	-8.02345	952.806	10.6503	952.806	1.26667	952.806	1.26107	954.372	3.04317	955.222	5.64391	923.065	-14.267	914.047	-6.006	917.194	10.6949	923.851	-5.01383	941.906	-3.3313	919.92	6.71484	914.414	-17.558	913.628	3.63867	913.628	-78.3247
914.348	-8.57346	953.589	11.6049	953.589	1.19814	953.589	1.59665	955.154	1.6741	956.005	5.80378	923.851	-27.3184	914.834	6.1985	917.98	37.6396	924.638	3.87755	942.69	-6.17855	920.706	3.03148	915.202	32.7738	914.414	-85.1788	914.414	-44.0318
915.136	-9.05837	954.372	1.066	954.372	1.50838	954.372	2.03482	955.937	0.139983	956.788	6.65724	924.638	-14.6082	915.62	47.894	918.766	4.88595	925.423	12.2931	943.474	-5.92292	921.494	-0.663079	915.989	43.6627	915.202	-84.9714	915.202	22.8585
915.922	-7.3769	955.154	-9.95743	955.154	1.23751	955.154	2.47074	956.72	-0.579584	957.57	5.83488	925.423	2.66573	916.408	-7.5845	919.554	-14.3953	926.209	1.64761	944.257	-5.90117	922.28	0.254025	916.775	4.02297	915.989	-49.9422	915.989	79.6274
916.708	-5.94463	955.937	-1.08054	955.937	0.941337	955.937	2.347	957.502	0.0290504	958.353	7.45907	926.209	26.3587	917.194	-16.709	920.34	-30.1371	926.994	6.58332	945.041	-3.91598	923.065	0.481899	917.561	-36.5644	916.775	63.4316	916.775	112.473
917.494	-3.43028	956.72	0.499083	956.72	1.36662	956.72	2.01024	958.285	0.0217878	959.135	9.21388	926.994	15.312	917.98	39.193	921.125	-1.81212	927.779	1.78964	945.825	-0.402476	923.851	1.66984	918.349	-44.4315	917.561	68.3523	917.561	146.487
918.282	-2.41332	957.502	-6.81757	957.502	2.01485	957.502	1.28146	959.067	-0.481895	959.917	13.9384	927.779	-6.56836	918.766	13.8215	921.911	0	928.564	-0.61075	946.608	-0.0258346	924.638	4.52948	919.135	-43.9666	918.349	60.5754	918.349	170.441
919.068	-2.39761	958.285	-1.88489	958.285	1.68115	958.285	0.0196388	959.849	-0.0630849	960.7	15.4506	928.564	-8.93553	919.554	-30.8385	922.697	-29.3411	929.351	-0.823803	947.392	2.38086	925.423	7.49186	919.92	-14.9297	919.135	38.7339	919.135	180.842
919.854	-3.19681	959.067	-2.54387	959.067	0.710439	959.067	-0.312397	960.632	0.805009	961.482	13.5204	929.351	6.67499	920.34	-35.3815	923.484	-7.53638	930.136	1.16469	948.175	-5.80191	926.209	10.0003	920.706	-11.7828	919.92	13.0747	919.92	203.121
920.64	-9.54553	959.849	0	959.849	0.720638	959.849	-0.297158	961.414	1.01235	962.262	9.92178	930.136	0.0426517	921.125	19.404	924.27	31.3988	930.921	-4.55222	948.958	-9.0965	926.994	4.30347	921.494	-35.0267	920.706	-16.2138	920.706	189.319
921.426	-9.68247	960.632	5.27671	960.632	0.326969	960.632	-0.159901	962.196	2.16781	963.044	7.92809	930.921	-13.1154	921.911	-0.1925	925.055	32.923	931.706	-1.32093	949.742	-10.4018	927.779	5.28782	922.28	-53.4072	921.494	-38.7811	921.494	135.383
922.213	-11.1305	962.196	1.67664	961.414	-0.0777138	961.414	-1.46368	962.978	1.87873	963.826	5.21531	931.706	9.46868	922.697	0	925.84	0	932.491	17.8609	950.525	-9.28414	928.564	0.532331	923.065	-57.1799	922.28	-29.6278	922.28	27.273
922.999	-10.0933	962.978	1.44135	962.196	0.0887284	962.196	-1.44329	963.76	1.52045	964.608	4.50119	932.491	-7.42139	923.484	0	926.626	-35.0145	933.275	5.31211	951.308	-4.54145	929.351	3.71137	923.851	-16.7892	923.065	-19.6828	923.065	14.9392
923.784	-6.48117	963.76	1.43132	962.978	0.332069	962.978	-0.341909	964.54	0.1256	965.39	11.4788	933.275	-22.5627	924.27	-0.77	927.413	-53.4575	934.062	2.78389	952.091	0.0788635	930.136	4.64715	924.638	-36.3319	923.851	-2.09271	923.851	-10.9175
924.57	-2.27862	964.54	1.02659	963.76	0.51646	963.76	0.274407	965.322	0.0448572	966.172	17.0393	934.062	-62.8046	925.055	-17.556	928.198	-24.633	934.846	0.269866	952.874	5.86582	930.921	0.511785	925.423	51.4047	924.638	22.1997	924.638	-0.527265
925.355	1.0686	965.322	0.771469	964.54	0.591523	964.54	0.21431	966.104	-1.09224	966.953	18.3282	934.846	-18.9374	925.84	62.293	928.983	-2.28632	935.631	0.355087	953.657	7.57226	931.706	-1.11136	926.209	98.2142	925.423	26.0457	925.423	51.3308
926.142	2.1327	966.104	0.167592	965.322	-0.0373271	965.322	0.125238	966.885	-1.88884	967.735	15.812	935.631	-29.0671	926.626	2.926	929.768	-0.516538	936.415	0.16334	954.44	9.06523	932.491	1.02357	926.994	101.003	926.209	-5.64654	926.209	88.2083
926.928	1.00798	966.885	0.257371	966.104	-0.538286	966.104	-0.339763	967.667	-0.755167	968.517	12.9574	936.415	3.02827	927.413	-18.4415	930.553	-6.77427	937.2	-0.106526	955.222	8.62196	933.275	6.16757	927.779	54.5336	926.994	-38.0646	926.994	89.542
927.713	0.298578	967.667	0.435402	966.885	-0.843226	966.885	-1.93147	968.449	0.75944	969.296	10.2117	937.2	-1.62076	928.198	0.231	931.338	10.9997	937.984	3.69291	956.005	9.53161	934.062	9.2308	928.564	-71.5195	927.779	-18.8249	927.779	75.0061
928.498	-0.664505	968.449	0.233681	967.667	-0.061192	967.667	-2.39132	969.23	1.05279	970.078	7.97226	937.984	15.6105	928.983	0	932.125	2.28632	938.768	3.12477	956.788	6.37843	934.846	10.6634	929.351	-144.416	928.564	-21.3984	928.564	45.9651
929.283	-2.11699	969.23	0.213445	968.449	0.337168	968.449	-2.50562	970.012	0.558793	970.859	7.20091	938.768	27.0625	929.768	-41.6955	932.909	5.69886	939.552	2.55663	957.57	3.2606	935.631	7.38913	930.136	-113.645	929.351	-35.8588	929.351	13.1299
930.068	-5.44849	970.012	0.596007	969.23	0.0224371	969.23	-2.85117	970.791	0.280251	971.64	5.04362	939.552	-10.8335	930.553	0	933.694	0.685895	940.336	1.98849	958.353	-1.3502	936.415	14.9557	930.921	-37.6014	930.136	-24.2829	930.136	13.285
930.855	-9.43552	970.791	0.954881	970.012	0.0340635	970.012	-3.62406	971.573	0.0605216	972.422	4.96151	940.336	-112.217	931.338	5.082	934.478	-3.75125	941.12	1.42035	959.135	-3.33266	937.2	9.64359	931.706	-2.05619	930.921	-12.0755	930.921	38.0148
931.64	-13.0499	971.573	2.15372	970.791	0.250479	970.791	-2.99712	972.354	0.895578	973.203	6.90295	941.12	-91.2533	932.125	15.2845	935.263	-0.262503	941.906	0.845108	959.917	-5.70537	937.984	4.8881	932.491	21.5989	931.706	-27.0544	931.706	68.6685
932.424	-13.0364	972.354	2.7144	971.573	0.216416	971.573	-2.58599	973.135	2.95317	973.984	5.80315	941.906	-36.1047	932.909	-11.8195	936.047	3.80206	942.69	0.276968	960.7	-7.03517	938.768	1.77257	933.275	52.6563	932.491	-44.2485	932.491	82.3981
933.209	-5.38339	973.135	3.89549	972.354	0.288418	972.354	-1.67649	973.916	3.84675	974.763	4.01412	942.69	10.0018	933.694	0	936.832	2.33712	943.474	0	961.482	-9.60367	939.552	4.1914	934.062	29.9667	933.275	-27.3089	933.275	131.672
933.994	-0.312048	973.916	2.62373	973.135	0.213764	973.135	-0.923991	974.697	3.15724	975.544	5.62773	943.474	3.66805	934.478	28.413	937.616	14.8865	944.257	0	962.262	-9.363	940.336	0.806902	934.846	-4.46997	934.062	-13.103	934.062	174.142
934.778	1.36942	974.697	2.0421	973.916	0.258842	973.916	-0.472513	975.476	1.38616	976.325	7.83168	944.257	6.03521	935.263	0	938.4	9.18761	945.041	0	963.044	-6.59326	941.12	-0.452014	935.631	41.4992	934.846	14.7149	934.846	203.276
935.563	3.65253	975.476	1.24124	974.697	0.0126463	974.697	-0.0544092	976.257	0.456831	977.106	12.4249	945.041	-52.6748	936.047	-33.803	939.186	10.3308	945.825	0	963.826	-0.401116	941.906	10.161	936.415	60.3982	935.631	21.3607	935.631	197.704
936.349	4.3799	976.257	0.731237	975.476	-0.611104	975.476	0.788236	977.038	-0.568191	977.886	13.2404	945.825	-7.84791	936.832	18.6725	939.971	-11.3215	946.608	0	964.608	1.01843	942.69	19.7579	937.2	37.9947	936.415	19.004	936.415	161.891
937.133	5.9783	977.038	0.261707	976.257	-0.32187	976.257	1.75065	977.819	-0.532163	978.665	12.6109	946.608	-9.91652	937.616	0	940.755	-37.8936	947.392	0	965.39	3.83304	943.474	18.3776	937.984	43.3229	937.2	-0.207385	937.2	156.505
937.918	3.20803	977.819	0.773075	977.038	-0.655366	977.038	1.58291	978.599	-1.45736	979.446	5.48902	947.392	-28.7472	938.4	-41.811	941.538	-25.9285	948.175	0	966.172	4.26407	944.257	19.8606	938.768	39.5503	937.984	-19.8619	937.984	115.099
938.702	-1.31105	978.599	1.61513	977.819	-0.101987	977.819	0.124379	979.378	-0.524331	980.226	3.38585	949.742	-15.4256	939.186	0	942.322	-10.7203	948.958	0	966.953	2.26937	945.041	21.5192	939.552	26.3371	938.768	-15.2711	938.768	87.0194
939.486	-4.68521	979.378	2.72524	978.599	0.510341	978.599	-2.07066	980.159	-0.132151	981.007	1.79525	950.525	-10.8188	939.971	22.1375	943.106	-0.143953	949.742	0	967.735	1.20199	945.825	22.1861	940.336	-18.5951	939.552	-45.5588	939.552	63.4165
940.27	-0.91594	980.159	2.82802	979.378	2.19129	979.378	-2.99165	980.939	0.410123	981.787	0.0845995	951.308	-0.479795	940.755	6.6605	943.89	6.5033	950.525	0	968.517	-3.5203	946.608	20.8431	941.12	-26.5337	940.336	-13.1313	940.336	35.3371
941.054	0.0224495	980.939	2.34918	980.159	2.56598	980.159	-2.56056	981.72	0.479616	982.566	-0.820491	952.091	5.79362	941.538	0	944.674	-1.08388	951.308	0	969.296	-7.43765	947.392	16.9393	941.906	-25.3537	941.12	4.91126	941.12	76.195
941.838	0.251434	981.72	1.81918	980.939	2.83299	980.939	-1.48515	982.498	0.185979	983.346	1.35608	952.874	6.57644	942.322	-17.5945	945.457	5.59724	952.091	0	970.078	-4.35925	948.175	10.8371	942.69	-37.4941	941.906	-15.3936	941.906	124.052
942.622	2.87354	982.498	1.65729	981.72	2.91682	981.72	-0.437635	983.278	0.326817	984.126	4.68905	953.657	4.70416	943.106	-1.7325	946.241	6.88436	952.874	-0.269866	970.859	2.54403	948.958	11.0389	943.474	-83.7315	942.69	-17.5241	942.69	154.282
943.406	2.96109	983.278	1.83371	982.498	2.61473	982.498	-0.785446	984.059	-0.295061	984.906	8.00088	954.44	-2.37012	943.89	2.1945	947.024	6.2154	953.657	-0.546835	971.64	9.31269	949.742	1.74829	944.257	-74.2909	943.474	-39.5729	943.474	154.272
944.189	3.50886	984.059	1.84576	983.278	2.146	983.278	-1.16835	984.839	-0.204634	985.685	8.98808	955.222	-4.19911	944.674	30.338	850.13	-0.677574	954.44	-0.823803	972.422	10.4317	950.525	1.23837	945.041	-28.4826	944.257	-38.3851	944.257	140.8
944.973	3.6211	984.839	1.70973	984.059	1.9506	984.059	-0.975288	985.617	-0.0326105	986.465	10.1781	956.005	-2.70201	945.457	7.5845	850.916	-1.18239	955.222	-2.13052	973.203	14.7366	951.308	-3.3322	945.825	0.500637	945.041	-55.4379	945.041	123.752
945.757	-0.276129	985.617	2.20913	984.839	1.29686	984.839	0.0110536	986.397	-0.212467	987.245	9.18465	956.788	0.274169	946.241	-3.388	851.704	2.99821	956.005	-0.0426105	973.984	16.8768	952.091	9.47549	946.608	28.7508	945.825	-77.5527	945.825	81.1161
946.54	-5.90197	986.397	2.43631	985.617	0.299841	985.617	2.34593	987.177	-1.08597	988.022	11.5441	957.57	-3.1818	947.024	-14.63	852.492	11.3441	956.788	0.376393	974.763	18.397	952.874	7.06786	947.392	-12.1226	946.608	-95.2841	946.608	48.0018
947.324	-9.47144	987.177	1.93209	986.397	0.239669	986.397	3.94773	987.957	-0.927476	988.802	12.8224	958.353	-3.63995	850.13	16.2492	853.28	13.419	957.57	0.617852	975.544	13.9031	953.657	8.07835	948.175	-13.2311	947.392	-83.5574	947.392	31.15
948.107	-8.59591	987.957	2.43591	987.177	1.07576	987.177	4.76601	988.735	-0.0981162	989.582	14.1474	959.135	-0.829721	850.916	18.6989	854.066	8.90059	958.353	0.553936	976.325	13.933	954.44	10.4075	948.958	-42.6972	948.175	-60.3114	948.175	46.5337
948.89	-3.74907	988.735	2.0886	987.957	1.40395	987.957	4.84231	989.514	0.597526	990.362	13.498	959.917	3.48122	851.704	23.0864	854.853	1.17088	959.135	0.916126	977.106	13.8514	955.222	11.5749	949.742	-33.6857	948.958	-48.0851	948.958	49.8627
949.674	2.99027	989.514	1.78642	988.735	1.18366	988.735	3.96501	990.294	0.0502685	991.139	13.4128	960.7	8.69404	852.492	27.3854	855.641	-8.99848	959.917	0	977.886	11.8309	956.005	13.5193	950.525	-30.7176	949.742	-19.0889	949.742	70.1676
950.457	5.92218	990.294	1.27706	989.514	2.37099	989.514	2.63397	991.072	-0.410835	991.919	10.1812	961.482	12.0418	853.28	14.7167	856.426	-17.6956	960.7	0	978.665	4.48026	956.788	18.6671	951.308	-34.7585	950.525	-29.7881	950.525	100.987
951.24	-0.767872	991.072	-0.361122	990.294	2.64186	990.294	0.81367	991.851	-0.805009	992.698	5.77143	962.262	10.1298	854.066	25.6319	857.214	-21.5422	961.482	0	979.446	-4.62032	957.57	21.7994	952.091	-42.8223	951.308	-31.6922	951.308	123.804
952.023	-0.886721	991.851	2.1281	991.072	1.73969	991.072	-0.134145	992.631	-0.942144	993.476	1.57691	963.044	-3.759	854.853	32.9296	858.001	-19.6765	962.262	2.87621	980.226	2.36863	958.353	22.3747	952.874	-46.3447	952.091	0.339358	952.091	140.511
952.806	-1.40408	992.631	2.77832	991.851	1.21915	991.851	-0.501917	993.408	-0.368114	994.255	-2.16102	963.826	-15.4004	855.641	37.1586	858.787	-12.4689	963.044	6.19983	981.007	9.01084	959.135	20.9215	953.657	-79.4761	952.874	-29.8446	952.874	153.786
953.589	-0.680738	993.408	3.37842	992.631	2.09807	992.631	-0.108926	994.188	0.014098	995.034	-3.06549	964.608	-22.3375	856.426	37.8401	859.574	-6.70663	963.826	-6.01518	981.787	10.2087	959.917	20.109	954.44	-80.2628	953.657	-67.8621	953.657	161.198
954.372	-0.679136	994.188	3.09069	993.408	2.67817	993.408	-0.0446435	994.967	-0.0993979	995.812	-2.30285	965.39	-17.7055	857.214	34.6905	860.361	-3.77368	964.608	-0.028407	982.566	11.4814	960.7	15.9849	955.222	-61.8286	954.44	-96.4153	954.44	136.924
955.154	-0.715656	994.967	2.55556	994.188	2.97638	994.188	0.627477	995.744	-0.725263	996.591	4.62063	966.172	-12.9076	858.001	31.7102	861.146	-1.08642	965.39	0.774091	983.346	10.0442	961.482	8.89646	956.005	-44.1991	955.222	-64.5911	955.222	114.406
955.937	-0.800227	995.744	1.51154	994.967	4.09068	994.967	0.307568	996.523	-0.766417	997.37	12.7646	966.953	-9.37585	858.787	26.8181	861.933	-7.86983	966.172	1.56238	984.126	17.2426	962.262	3.2687	956.788	-8.24263	956.005	-50.1684	956.005	76.1123
956.72	-0.81208	996.523	-0.0538029	995.744	4.13576	995.744	-0.365518	997.302	-0.258321	998.147	17.6906	967.735	-9.96026	859.574	24.3905	862.72	-11.8489	966.953	1.6405	984.906	22.6556	963.044	-0.0522992	957.57	40.3013	956.788	-32.5878	956.788	50.0592
957.502	-0.524729	997.302	-0.237134	996.523	4.04765	996.523	-0.951142	998.079	0.228273	998.926	16.9361	968.517	-11.4718	860.361	25.293	863.505	-14.7435	967.735	0	985.685	24.2492	963.826	-0.980609	958.353	74.8631	957.57	-23.0009	957.57	37.2084
958.285	-0.222641	998.079	-0.75589	997.302	4.08885	997.302	0.874197	998.858	-0.0351737	999.705	12.8653	969.296	-8.61467	861.146	25.6835	864.292	-16.4576	968.517	0	986.465	24.5062	964.608	-0.15503	959.135	50.9219	958.353	-1.81933	958.353	18.1855
959.067	-0.112122	998.858	0.358954	998.079	3.65887	998.079	1.4845	999.637	-1.5737	1000.48	9.7644	970.078	-0.104617	861.933	34.3663	865.077	1.08066	969.296	0	987.245	23.9772	965.39	-1.81366	959.917	-32.7738	959.135	1.84761	959.135	6.25481
959.849	-0.0772037	999.637	1.42722	998.858	3.81573	998.858	1.13304	1000.41	-3.12349	1001.26	5.46289	970.859	-13.023	862.72	32.0786	865.863	-2.10182	970.078	0	988.022	24.7292	966.172	3.62732	960.7	-131.149	959.917	26.0363	959.917	38.9763
960.632	-0.04613	1000.41	2.33264	999.637	3.59483	999.637	0.159257	1001.19	-1.98782	1002.04	2.03848	971.64	-12.4891	863.505	28.2843	866.65	-2.66423	970.859	0	988.802	23.0798	966.953	8.83856	961.482	-107.851	960.7	34.1337	960.7	84.7243
961.414	-0.00864937	1001.19	2.34018	1000.41	3.68661	1000.41	-0.0228583	1001.97	-0.726687	1002.82	0.432328	972.422	-8.67961	864.292	21.2518	867.435	0.314793	971.64	0	989.582	18.7029	967.735	18.5158	962.262	-76.8835	961.482	31.664	961.482	163.276
962.196	-0.0435672	1001.97	1.93329	1001.19	3.81043	1001.19	0.300378	1002.75	0.338636	1003.59	0.468408	973.203	-3.74096	865.077	16.6065	868.221	2.55098	972.422	0	990.362	16.1208	968.517	20.9178	963.044	-79.2258	962.262	-4.09115	962.262	204.982
962.978	0.0365196	1002.75	1.56325	1001.97	3.28193	1001.97	0.462425	1003.53	2.79211	1004.37	0.348973	973.984	2.16449	865.863	13.5379	869.006	-0.0998125	973.203	0	991.139	15.993	969.296	21.8013	963.826	-98.84	963.044	-4.54362	963.044	174.949
963.76	0.107637	1003.53	1.50311	1002.75	2.19414	1002.75	-0.102594	1004.3	3.27401	1005.15	-3.16688	974.763	7.39174	866.65	7.41167	869.064	-0.211142	973.984	0	991.919	17.6546	970.078	17.6584	964.608	-100.628	963.826	-11.048	963.826	158.055
964.54	0.263966	1004.3	0.652219	1003.53	1.63933	1003.53	-1.50468	1005.08	3.8684	1005.93	0.603394	975.544	9.51654	867.435	8.42472	869.855	-12.5303	974.763	0	992.698	20.3495	970.859	13.7565	965.39	-84.6612	964.608	-41.3357	964.608	144.357
965.322	0.242503	1005.08	-0.138201	1004.3	0.642312	1004.3	-3.02685	1005.86	2.54191	1006.7	-0.011197	976.325	1.42496	868.221	9.08781	870.647	-5.79297	976.325	0.119011	993.476	23.8698	971.64	8.06341	966.172	-56.8938	965.39	-30.118	965.39	109.185
966.104	0.133264	1005.86	-0.230308	1005.08	0.650675	1005.08	-3.35009	1006.64	2.85377	1007.48	-2.7781	977.106	-3.58223	869.006	26.3245	871.437	-2.12102	977.106	-0.168243	994.255	25.2526	972.422	1.94441	966.953	3.54022	966.172	-0.58445	966.172	57.4409
966.885	0.0160174	1006.64	0.21746	1005.86	-0.0628238	1005.86	-2.79666	1007.41	0.929897	1008.26	-6.39037	977.886	-8.676	869.064	28.229	872.229	-4.39367	977.886	-0.000856197	995.034	32.7936	973.203	5.17575	967.735	-4.59513	966.953	39.243	966.953	101.007
967.667	-0.10155	1007.41	0.237536	1006.64	-0.634357	1006.64	-1.64333	1008.19	-0.637969	1009.04	-7.95049	978.665	-17.233	869.855	34.6426	873.021	18.0737	978.665	-0.0406694	995.812	34.5191	973.984	4.45664	968.517	-62.8657	967.735	64.6194	967.735	120.599
968.449	0.253395	1008.19	-0.641138	1007.41	-1.16693	1007.41	-1.50446	1008.97	0.0626577	1009.81	-3.81009	979.446	-9.27845	870.647	29.8425	873.811	13.1925	979.446	0.277836	996.591	32.3708	974.763	8.05968	969.296	-90.2219	968.517	51.1111	968.517	129.19
969.23	0.433109	1008.97	-0.783836	1008.19	-1.84453	1008.19	-1.52131	1009.74	-1.19135	1010.59	-0.0945524	980.226	3.46319	871.437	20.7656	874.603	11.3057	980.226	2.67433	997.37	28.9524	975.544	13.8966	970.078	-58.3599	969.296	58.4544	969.296	123.452
970.012	0.475715	1009.74	-1.71527	1008.97	-1.88002	1008.97	-1.99125	1010.52	-1.6301	1011.37	2.62507	981.007	7.85349	872.229	9.87615	875.392	10.7279	981.007	4.85121	998.147	27.8946	976.325	14.6064	970.859	5.5964	970.078	59.3311	970.078	96.872
970.791	0.580789	1010.52	-2.43799	1009.74	-2.05422	1009.74	-1.8981	1011.3	-2.88183	1012.14	5.9935	981.787	13.8888	873.021	6.4465	876.184	2.4147	981.787	5.99038	998.926	29.6296	977.106	15.955	971.64	51.9411	970.859	69.7003	970.859	50.1729
971.573	0.762747	1011.3	-2.6732	1010.52	-2.2637	1010.52	-1.08872	1012.08	-4.43403	1012.92	6.20749	982.566	14.5273	873.811	4.77036	876.974	-25.2948	982.566	5.8414	999.705	27.919	977.886	16.1156	972.422	65.0828	971.64	52.2517	971.64	14.629
972.354	0.755058	1012.08	-3.3455	1011.3	-2.24309	1011.3	-0.281383	1012.85	-2.61396	1013.7	6.54838	983.346	14.769	874.603	10.926	877.765	-5.95612	983.346	6.23483	1000.48	27.8239	978.665	11.0333	973.203	61.3637	972.422	27.2523	972.422	0.578958
973.135	0.671127	1012.85	-3.48603	1012.08	-1.89206	1012.08	0.582833	1013.63	-0.00512654	1014.47	7.3303	984.126	6.08943	875.392	16.0318	878.555	5.7469	984.126	6.48484	1001.26	35.4002	979.446	5.13839	973.984	45.5043	973.203	-0.122546	973.203	-63.8714
973.916	0.715656	1013.63	-3.68461	1012.85	-1.80006	1012.85	1.02938	1014.41	1.39015	1015.25	6.91352	984.906	-4.10532	876.184	20.9534	879.346	5.87358	984.906	6.36925	1002.04	35.8788	980.226	3.44801	974.763	1.34099	973.984	10.0676	973.984	-117.683
974.697	0.799907	1014.41	-4.07159	1013.63	-1.30543	1013.63	0.772032	1015.18	0.703332	1016.03	8.18438	985.685	-23.0518	876.974	16.1902	880.137	0.220739	985.685	5.55843	1002.82	31.1484	981.007	1.42515	975.544	-32.8632	974.763	26.8941	974.763	-73.4553
975.476	0.811119	1015.18	-4.54112	1014.41	-1.41007	1014.41	1.04526	1015.96	1.72465	1016.8	9.26178	986.465	-27.8173	877.765	23.93	880.927	1.20159	986.465	4.12558	1003.59	38.3861	981.787	3.13235	976.325	-43.4123	975.544	58.3695	975.544	-38.2112
976.257	1.13787	1015.96	-4.22963	1015.18	-0.61192	1015.18	0.61535	1016.74	2.03937	1017.58	8.73739	987.245	-19.971	878.555	27.4922	881.718	-2.66615	987.245	1.83312	1004.37	38.3807	982.566	7.09961	977.106	-21.7419	976.325	54.3161	976.325	-32.3286
977.038	1.06836	1016.74	-3.97523	1015.96	0.255375	1015.96	-0.020712	1017.51	2.22278	1018.36	8.24348	988.022	-7.63704	879.346	25.5324	882.507	-8.13856	988.022	0.0586495	1005.15	36.0678	983.346	13.1682	977.886	-49.2412	977.106	30.1746	977.106	30.9846
977.819	1.09655	1017.51	-3.88778	1016.74	0.160731	1016.74	-0.219783	1018.29	2.19857	1019.13	9.69971	988.802	-0.108225	880.137	19.7857	883.298	-5.84671	988.802	-1.60237	1005.93	33.8991	984.126	15.4114	978.665	-53.6039	977.886	30.6176	977.886	87.9292
978.599	1.14748	1018.29	-3.10692	1017.51	-0.704728	1017.51	0.0100877	1019.06	0.731813	1019.91	10.7883	989.582	1.04256	880.927	8.36946	884.087	-4.55299	989.582	-2.33314	1006.7	31.166	984.906	17.4735	979.446	-67.4965	978.665	13.1595	978.665	120.537
979.378	1.23334	1019.06	-3.84393	1018.29	-1.80455	1018.29	-0.0356289	1019.84	-0.854423	1020.68	11.1659	990.362	1.75684	881.718	12.6906	884.878	-2.15173	990.362	-1.70469	1007.48	28.9837	985.685	19.728	980.226	-76.061	979.446	-26.0928	979.446	110.829
980.159	1.21828	1019.84	-3.1286	1019.06	-3.17423	1019.06	-0.0756578	1020.62	-2.39751	1021.46	10.3504	991.139	-0.54473	882.507	13.6852	885.667	-3.39171	991.139	0.618174	1008.26	29.805	986.465	23.6504	981.007	-53.0854	980.226	-85.5653	980.226	39.855
980.939	0.74705	1020.62	-1.83131	1019.84	-4.18982	1019.84	-0.0598824	1021.39	-2.74911	1022.23	11.7089	991.919	-2.2655	883.298	16.9454	886.458	-4.71038	991.919	2.68246	1009.04	34.4375	987.245	27.0966	981.787	-33.2208	981.007	-131.435	981.007	-1.37502
981.72	0.874868	1021.39	-0.860525	1020.62	-4.14963	1020.62	0.0745847	1022.17	-2.65583	1023.01	12.5873	992.698	7.58654	884.087	22.5743	887.246	-9.36126	992.698	3.57847	1009.81	34.6279	988.022	30.5352	982.566	-20.5619	981.787	-114.26	981.787	-26.2599
982.498	0.752495	1022.17	-1.33495	1021.39	-4.17207	1021.39	-0.571029	1022.94	-1.94951	1023.79	9.62195	993.476	6.76043	884.878	31.3234	888.037	-10.6819	993.476	5.42015	1010.59	35.7225	988.802	31.2898	983.346	5.18517	982.566	-111.847	982.566	-21.7936
983.278	0.823613	1022.94	-2.03062	1022.17	-3.79492	1022.17	-0.723739	1023.72	-0.63626	1024.56	10.1277	994.255	2.17892	885.667	29.1463	888.826	-11.2097	994.255	5.78703	1011.37	38.4772	989.582	28.2752	984.126	4.73817	983.346	-91.2307	983.346	-11.6102
984.059	0.88608	1023.72	-3.21942	1022.94	-2.75507	1022.94	0.212486	1024.49	-0.424648	1025.34	11.8414	995.034	-0.761179	886.458	33.0548	889.614	-12.0831	995.034	6.79735	1012.14	46.505	990.362	24.3957	984.906	22.2426	984.126	-64.2046	984.126	53.8637
984.839	0.656712	1024.49	-3.97459	1023.72	-2.1664	1023.72	1.24143	1025.27	-0.411262	1026.11	13.0401	995.812	-1.02813	887.246	37.7296	890.404	-14.7339	995.812	8.13002	1012.92	54.186	991.139	21.9115	985.685	24.9246	984.906	-34.3788	984.906	68.6168
985.617	0.413888	1025.27	-2.78498	1024.49	-1.6685	1024.49	1.73627	1026.05	-1.47303	1026.89	12.9723	996.591	1.6378	888.037	34.8047	891.193	-9.88528	996.591	8.78843	1013.7	56.3684	991.919	19.9577	986.465	46.7201	985.685	-18.7589	985.685	44.6004
986.397	0.550036	1026.05	-2.58085	1025.27	-0.583976	1025.27	2.17519	1026.82	-1.50549	1027.66	10.9998	997.37	6.47904	888.826	23.9079	891.983	-4.19597	997.37	7.3984	1014.47	56.0298	992.698	21.4912	987.245	3.62962	986.465	-37.0183	986.465	1.35435
987.177	0.552919	1026.82	-3.34879	1026.05	0.194183	1026.05	1.75354	1027.6	-1.41962	1028.44	11.5366	998.147	-0.0144299	889.614	21.4692	892.771	-0.161236	998.147	5.32554	1015.25	53.0779	993.476	20.1296	988.022	-52.8172	987.245	-82.9258	987.245	-18.0924
987.957	0.582071	1027.6	-2.05077	1026.82	0.0703708	1026.82	1.70815	1028.37	-0.699345	1029.21	11.3482	998.926	-8.70486	890.404	21.4986	893.562	8.94282	998.926	5.78104	1016.03	52.7447	994.255	17.0775	988.802	-60.3625	988.022	-14.6867	988.022	-11.7652
988.735	0.713093	1028.37	-0.984512	1027.6	-0.0752662	1027.6	1.10353	1029.15	-0.0649361	1029.99	8.67394	999.705	-15.238	891.193	22.5485	894.35	11.4746	999.705	5.47923	1016.8	55.0576	995.034	18.7623	989.582	-37.5656	988.802	-0.254518	988.802	-10.3902
989.514	0.907864	1029.15	0.0873694	1028.37	-0.147065	1028.37	1.18337	1029.92	0.65577	1030.76	7.45347	1000.48	-30.8656	891.983	31.3382	895.138	1.01156	1000.48	5.0674	1017.58	58.2951	995.812	25.1933	990.362	35.2412	989.582	-23.2272	989.582	-11.7032
990.294	1.04145	1029.92	0.853458	1029.15	-0.0801615	1029.15	0.546883	1030.7	0.558081	1031.54	8.81701	1001.26	-30.4255	892.771	35.8288	895.928	-2.00777	1001.26	6.18303	1018.36	62.7808	996.591	30.0888	991.139	101.307	990.362	-27.3937	990.362	12.8818
991.072	0.926764	1030.7	1.02434	1029.92	0.0856688	1029.92	-0.10957	1031.47	1.05507	1032.31	13.1272	1002.04	-25.2235	893.562	31.8392	896.716	-1.52598	1002.04	5.07725	1019.13	58.9002	997.37	38.1821	991.919	126.375	991.139	-33.0497	991.139	30.3436
991.851	1.35731	1031.47	0.816519	1030.7	-0.0577244	1030.7	-0.185442	1032.25	1.29303	1033.09	15.3492	1002.82	-10.5663	894.35	37.6928	897.505	1.31676	1002.82	4.6637	1019.91	72.7584	998.147	43.3112	992.698	100.878	991.919	-70.0397	991.919	55.8281
992.631	1.56586	1032.25	1.44047	1031.47	-0.650063	1031.47	-0.612989	1033.02	1.84712	1033.86	15.7784	1003.59	-1.67748	895.138	42.8501	898.293	-3.06348	1003.59	5.73523	1020.68	83.6253	998.926	48.2385	993.476	59.5221	992.698	-68.9556	992.698	45.6653
993.408	1.73372	1033.02	3.25909	1032.25	-1.02701	1032.25	-1.21353	1033.8	1.33404	1034.64	15.1452	1004.37	0.974021	895.928	48.8437	899.081	-0.589278	1004.37	5.89235	1021.46	93.4642	999.705	45.9766	994.255	17.8441	993.476	-72.4906	993.476	31.3671
994.188	1.68214	1033.8	2.17862	1033.02	-1.16163	1033.02	-1.79186	1034.57	2.48751	1035.41	15.1738	1005.15	6.76403	896.716	42.3455	899.87	-1.23422	1005.15	5.91718	1022.23	96.1034	1000.48	47.0599	995.034	-29.323	994.255	-77.6092	994.255	11.0829
994.967	1.51076	1034.57	1.20599	1033.8	-1.30257	1033.8	-2.33981	1035.34	3.19013	1036.19	16.8969	1005.93	-0.259739	897.505	34.171	900.658	-1.43576	1005.93	5.61794	1023.01	96.5004	1001.26	47.6614	995.812	-27.4277	995.034	-62.7341	995.034	-3.81492
995.744	1.22212	1035.34	0.00891361	1034.57	-1.64076	1034.57	-1.72382	1036.12	4.3305	1036.96	19.8013	1006.7	-7.18972	898.293	28.3985	901.447	-5.0079	1006.7	6.02163	1023.79	98.0206	1002.04	42.7097	996.591	-12.0868	995.812	-33.3608	995.812	2.54328
996.523	0.97866	1036.12	1.49323	1035.34	-1.49431	1035.34	-0.857777	1036.89	6.3767	1037.74	23.0689	1007.48	-10.0468	899.081	28.9289	902.235	-8.0541	1007.48	5.12263	1024.56	104.532	1002.82	38.2905	997.37	6.43676	996.591	-30.5893	996.591	38.1802
997.302	0.705725	1036.89	1.17459	1036.12	-1.69155	1036.12	-0.832773	1037.67	7.01467	1038.51	25.2281	1008.26	-14.7799	899.87	37.8401	903.022	-18.7148	1008.26	6.15691	1025.34	111.796	1003.59	35.1787	998.147	-37.5478	997.37	-39.2052	997.37	65.567
998.079	0.645499	1037.67	1.28838	1036.89	-1.9251	1036.89	-0.388484	1038.44	7.95482	1039.28	28.6892	1009.04	-20.8873	900.658	37.3502	903.811	-23.1795	1009.04	7.13597	1026.11	117.913	1004.37	29.0839	998.926	-49.8491	998.147	-42.9382	998.147	81.3953
998.858	0.805673	1038.44	1.23658	1037.67	-1.41394	1037.67	-0.171598	1039.21	9.92227	1040.06	32.9913	1009.81	-15.2669	901.447	33.0401	904.598	-17.4154	1009.81	8.50803	1026.89	128.806	1005.15	31.2805	999.705	-50.9219	998.926	-58.822	998.926	91.7855
999.637	0.922279	1039.21	1.33568	1038.44	-0.71717	1038.44	0.170847	1039.99	12.4209	1040.83	37.2686	1010.59	0.0649347	902.235	37.7775	905.386	-9.96206	1010.59	9.48538	1027.66	132.007	1005.93	35.7614	1000.48	-16.521	999.705	-82.1152	999.705	81.54
1000.41	0.860773	1039.99	0.410829	1039.21	0.0369192	1039.21	0.873123	1040.76	15.2694	1041.61	36.5414	1011.37	19.8123	903.022	35.6298	906.175	-5.54727	1011.37	10.1395	1028.44	131.138	1006.7	40.0537	1001.26	-40.0152	1000.48	-105.917	1000.48	66.9833
1001.19	1.08085	1040.76	0.706183	1039.99	0.259862	1039.99	1.59858	1041.54	17.6672	1042.38	37.3501	1012.14	43.0445	903.811	38.6727	906.962	0.0403089	1012.14	11.0544	1029.21	129.76	1007.48	44.7606	1002.04	-60.6664	1001.26	-72.5189	1001.26	94.3081
1001.97	1.10616	1041.54	0.299369	1040.76	0.122588	1040.76	2.38703	1042.31	20.3579	1043.15	34.9048	1012.92	40.9161	904.598	31.4008	907.749	-0.351263	1012.92	12.0403	1029.99	129.32	1008.26	49.3106	1002.82	-36.4571	1002.04	-23.2083	1002.04	94.8353
1002.75	1.14909	1042.31	-0.10086	1041.54	0.152164	1041.54	4.02274	1043.09	22.4343	1043.93	35.8969	1013.7	32.7055	905.386	27.3707	908.537	-5.09236	1013.7	9.13562	1030.76	130.164	1009.04	55.5025	1003.59	-14.5721	1002.82	18.0897	1002.82	92.1577
1003.53	1.18432	1043.09	-0.179075	1042.31	0.435483	1042.31	5.60372	1043.86	25.2664	1044.7	38.313	1014.47	16.8325	906.175	21.2997	909.324	-15.517	1014.47	8.87277	1031.54	139.495	1009.81	60.8762	1004.37	-3.21838	1003.59	54.6743	1003.59	75.7814
1004.3	1.12506	1043.86	-0.728587	1043.09	0.751642	1043.09	7.40824	1044.63	28.0117	1045.47	44.6518	1015.25	4.89896	906.962	6.85909	910.111	-17.9087	1015.25	7.72161	1032.31	155.292	1010.59	66.4125	1005.15	1.10855	1004.37	46.3883	1004.37	69.5163
1005.08	1.15902	1044.63	-0.571595	1043.86	0.799371	1043.86	9.29196	1045.41	30.6218	1046.25	46.0806	1016.03	-2.68036	907.749	-4.2624	910.899	-17.1006	1016.03	7.3984	1033.09	169.145	1011.37	68.398	1005.93	-87.5041	1005.15	13.4329	1005.15	47.0817
1005.86	1.25576	1045.41	0.243237	1044.63	0.816709	1044.63	10.4406	1046.18	33.4679	1047.02	52.8094	1016.8	-10.1154	908.537	1.046	911.686	-12.8432	1016.8	4.92613	1033.86	184.697	1012.14	71.8983	1006.7	-84.0712	1005.93	-32.0505	1005.93	49.3045
1006.64	1.27082	1046.18	2.23234	1045.41	0.809774	1045.41	12.1024	1046.95	36.9252	1047.79	60.516	1017.58	-10.6565	909.324	10.8487	912.473	-7.55888	1017.58	4.21292	1034.64	196.429	1012.92	63.0186	1007.48	-87.7366	1006.7	-64.4026	1006.7	18.568
1007.41	1.08213	1046.95	3.9607	1046.18	0.686166	1046.18	13.6554	1047.72	43.855	1048.57	64.8374	1018.36	-10.0252	910.111	18.6952	913.259	-6.94273	1018.36	3.79895	1035.41	208.192	1013.7	57.7943	1008.26	-28.0178	1007.48	-85.9706	1007.48	-0.372187
1008.19	0.952712	1047.72	3.81792	1046.95	1.39966	1046.95	14.653	1048.5	50.4414	1049.34	66.6103	1019.13	-8.4848	910.899	24.7109	914.047	-7.70476	1019.13	2.90722	1036.19	230.695	1014.47	61.1639	1009.04	1.66283	1008.26	-75.9407	1008.26	53.688
1008.97	0.504547	1048.5	2.88785	1047.72	1.69522	1047.72	15.5955	1049.27	58.2483	1050.11	71.3616	1019.91	-6.33835	911.686	29.3636	914.834	-5.27663	1019.91	3.10628	1036.96	255.654	1015.25	58.6909	1009.81	29.9846	1009.04	-40.8172	1009.04	129.015
1009.74	0.194771	1049.27	3.66165	1048.5	1.13552	1048.5	16.2967	1050.04	68.259	1050.89	80.8137	1020.68	5.86577	912.473	27.879	915.62	1.74288	1020.68	5.00661	1037.74	279.283	1016.03	61.3768	1010.59	71.8771	1009.81	-8.58764	1009.81	157.714
1010.52	0.226165	1050.04	3.48177	1049.27	2.81238	1049.27	18.0231	1050.82	78.7829	1051.66	92.522	1021.46	17.049	913.259	21.6939	916.408	6.42255	1021.46	10.0051	1038.51	303.675	1016.8	70.4601	1011.37	103.346	1010.59	34.8502	1010.59	286.408
1011.3	0.305291	1050.82	3.1869	1050.04	3.94913	1050.04	19.2343	1051.59	89.4312	1052.43	97.7865	1022.23	33.0698	914.047	26.8107	917.194	12.5553	1022.23	12.5296	1039.28	325.698	1017.58	73.2263	1012.14	96.5514	1011.37	57.2855	1011.37	366.067
1012.08	0.218156	1051.59	3.63691	1050.82	5.66964	1050.82	19.7685	1052.36	99.3635	1053.2	101.172	1023.01	34.2386	914.834	35.0662	917.98	11.0024	1023.01	13.5819	1040.06	350.962	1018.36	79.2071	1012.92	86.9499	1012.14	81.6815	1012.14	345.596
1012.85	0.0797664	1052.36	3.64687	1051.59	7.42769	1051.59	20.6083	1053.14	108.186	1053.98	105.219	1023.79	29.3216	915.62	41.0709	918.766	-4.08272	1023.79	13.0549	1040.83	382.835	1019.13	83.6114	1013.7	47.5962	1012.92	44.7481	1012.92	282.469
1013.63	-0.266529	1053.14	5.14508	1052.36	9.07069	1052.36	22.3013	1053.91	117.003	1054.75	109.46	1024.56	34.6427	916.408	35.6593	919.554	-16.1312	1024.56	13.4654	1041.61	421.919	1019.91	92.4014	1014.47	0.840354	1013.7	35.5477	1013.7	244.341
1014.41	-0.192529	1053.91	7.30362	1053.14	10.296	1053.14	24.1404	1054.68	124.313	1055.52	120.029	1025.34	38.4197	917.194	30.4725	920.34	-27.3563	1025.34	14.6684	1042.38	466.453	1020.68	101.096	1015.25	42.125	1014.47	31.9562	1014.47	174.659
1015.18	-0.0137749	1054.68	8.62332	1053.91	11.5516	1053.91	26.6749	1055.45	129.679	1056.3	129.089	1026.11	36.9767	917.98	30.8261	921.125	-27.5079	1026.11	15.4034	1043.15	515.078	1021.46	106.916	1016.03	99.0545	1015.25	43.4284	1015.25	118.686
1015.96	0.0140953	1055.45	10.6319	1054.68	12.411	1054.68	29.6719	1056.23	131.866	1057.07	131.495	1026.89	40.8403	918.766	25.3298	921.911	-24.1623	1026.89	16.9882	1043.93	569.35	1022.23	110.867	1016.8	145.953	1016.03	49.6971	1016.03	129.232
1016.74	0.00416451	1056.23	12.1871	1055.45	13.6409	1055.45	33.4749	1057	131.125	1057.84	146.273	1027.66	42.507	919.554	20.3161	922.697	-17.9739	1027.66	18.3333	1044.7	629.238	1023.01	84.9675	1017.58	111.177	1016.8	52.1857	1016.8	112.742
1017.51	-0.0413248	1057	13.9698	1056.23	14.6149	1056.23	37.0949	1057.77	130.005	1058.61	155.981	1028.44	46.9911	920.34	32.727	923.484	-2.56058	1028.44	18.9746	1045.47	694.535	1023.79	102.585	1018.36	100.807	1017.58	54.8157	1017.58	90.1623
1018.29	0.0576625	1057.77	15.9186	1057	17.2331	1057	40.2928	1058.54	128.118	1059.38	161.748	1029.21	50.2992	921.125	45.5357	924.27	10.0734	1029.21	18.6219	1046.25	767.93	1024.56	92.6853	1019.13	67.0138	1018.36	29.7032	1018.36	96.4275
1019.06	0.0669525	1058.54	18.6363	1057.77	19.9355	1057.77	42.6491	1059.31	125.753	1060.15	166.186	1029.99	60.4109	921.911	56.9077	925.055	14.2271	1029.99	19.1232	1047.02	843.577	1025.34	98.9762	1019.91	130.076	1019.13	19.3622	1019.13	159.007
1019.84	0.2771	1059.31	20.7042	1058.54	22.4326	1058.54	46.089	1060.09	122.34	1060.93	172.156	1030.76	87.8855	922.697	63.2033	925.84	9.82769	1030.76	19.1056	1047.79	928.783	1026.11	104.8	1020.68	172.523	1019.91	26.4228	1019.91	203.028
1020.62	0.580469	1060.09	23.0915	1059.31	24.5741	1059.31	49.0073	1060.86	119.018	1061.7	183.689	1031.54	99.4331	923.484	63.9806	926.626	-1.64883	1031.54	19.306	1048.57	1034.23	1026.89	112.858	1021.46	194.032	1020.68	28.7511	1020.68	306.145
1021.39	0.709569	1060.86	23.8176	1060.09	27.5788	1060.09	51.1206	1061.63	116.847	1062.47	202.268	1032.31	110.021	924.27	62.0908	927.413	-12.4113	1032.31	20.9494	1049.34	1151.62	1027.66	122.214	1022.23	192.87	1021.46	36.924	1021.46	345.224
1022.17	0.71982	1061.63	25.6534	1060.86	30.2468	1060.86	52.1097	1062.4	115.531	1063.24	221.269	1033.09	119.227	925.055	52.627	928.198	-12.4401	1033.09	22.9542	1050.11	1277.86	1028.44	135.623	1023.01	190.76	1022.23	37.7158	1022.23	327.742
1022.94	0.751214	1062.4	27.3815	1061.63	32.721	1061.63	52.4934	1063.17	116.352	1064.01	237.605	1033.86	130.544	925.84	59.2395	928.983	-11.4688	1033.86	25.8285	1050.89	1422.79	1029.21	147.213	1023.79	170.699	1023.01	39.5069	1023.01	321.994
1023.72	0.888002	1063.17	29.1399	1062.4	35.2547	1062.4	52.8791	1063.94	119.801	1064.78	259.153	1034.64	156.962	926.626	56.1672	929.768	-9.05415	1034.64	28.1954	1051.66	1579.17	1029.99	158.95	1024.56	114.252	1023.79	59.3499	1023.79	329.716
1024.49	0.884799	1063.94	31.9392	1063.17	37.5772	1063.17	52.9927	1064.72	125.826	1065.56	282.173	1035.41	172.463	927.413	48.7332	930.553	-8.45911	1035.41	29.972	1052.43	1741.8	1030.76	166.386	1025.34	52.3165	1024.56	100.214	1024.56	370.047
1025.27	0.77556	1064.72	33.4533	1063.94	38.6407	1063.94	54.1543	1065.49	135.48	1066.33	310.053	1036.19	186.37	928.198	47.4107	931.338	-2.4147	1036.19	33.9688	1053.2	1913.06	1031.54	173.635	1026.11	43.0726	1025.34	145.877	1025.34	347.912
1026.05	0.697396	1065.49	34.7962	1064.72	40.0922	1064.72	56.451	1066.26	148.014	1067.1	340.139	1036.96	197.008	928.983	50.763	932.125	-2.37247	1036.96	36.7167	1053.98	2081.14	1032.31	181.521	1026.89	72.9142	1026.11	169.915	1026.11	317.01
1026.82	0.5164	1066.26	37.2557	1065.49	41.6055	1065.49	59.3652	1067.03	163.701	1067.87	374.722	1037.74	220.197	929.768	57.4786	932.909	-0.424203	1037.74	40.2284	1054.75	2243.05	1033.09	190.007	1027.66	144.148	1026.89	163.118	1026.89	300.014
1027.6	0.225845	1067.03	38.6028	1066.26	43.861	1066.26	63.9377	1067.8	182.721	1068.64	417.018	1038.51	261.438	930.553	73.1202	933.694	-0.72556	1038.51	43.0081	1055.52	2417.34	1033.86	202.585	1028.44	163.1	1027.66	165.833	1027.66	314.57
1028.37	0.170425	1067.8	39.4002	1067.03	46.9881	1067.03	70.2902	1068.57	205.467	1069.41	468.229	1039.28	289.663	931.338	73.2749	934.478	-0.00575842	1039.28	45.0792	1056.3	2590.1	1034.64	217.551	1029.21	226.985	1028.44	191.69	1028.44	320.484
1029.15	0.136148	1068.57	40.9091	1067.8	50.5497	1067.8	78.4856	1069.34	231.947	1070.18	527.713	1040.06	312.563	932.125	63.7301	935.263	3.2132	1040.06	46.965	1057.07	2762.83	1035.41	232.688	1029.99	294.321	1029.21	243.376	1029.21	359.853
1029.92	-0.0301126	1069.34	45.3572	1068.57	55.6531	1068.57	88.9015	1070.11	262.288	1070.95	601.359	1040.83	336.748	932.909	55.2831	936.047	6.57035	1040.83	51.5632	1057.84	2926.68	1036.19	250.181	1030.76	289.261	1029.99	292.347	1029.99	414.658
1030.7	-0.342131	1070.11	52.0172	1069.34	63.6968	1069.34	101.257	1070.88	297.404	1071.72	677.976	1041.61	363.919	933.694	63.1297	936.832	7.27864	1041.61	57.003	1058.61	3091.18	1036.96	273.923	1031.54	270.237	1030.76	335.003	1030.76	384.18
1031.47	-0.420936	1070.88	60.4401	1070.11	72.1552	1070.11	115.358	1071.66	339.421	1072.5	770.562	1042.38	398.732	934.478	69.2117	937.616	9.64727	1042.38	62.0696	1059.38	3253.79	1037.74	300.205	1032.31	239.59	1031.54	379.902	1031.54	380.737
1032.25	-0.251793	1071.66	69.961	1070.88	82.5458	1070.88	131.767	1072.43	392.085	1073.27	882.488	1043.15	444.904	935.263	60.993	938.4	7.87751	1043.15	68.4345	1060.15	3396.96	1038.51	326.093	1033.09	283.503	1032.31	416.684	1032.31	438.871
1033.02	0.183559	1072.43	80.2924	1071.66	93.2992	1071.66	151.383	1073.2	452.535	1074.04	1025.06	1043.93	489.016	936.047	44.0916	939.186	7.65677	1043.93	73.6269	1060.93	3539.64	1039.28	352.857	1033.86	324.895	1033.09	442.108	1033.09	502.98
1033.8	0.73872	1073.2	91.5295	1072.43	105.295	1072.43	174.63	1073.97	522.45	1074.81	1201.1	1044.7	539.016	936.832	36.0314	939.971	2.26882	1044.7	79.2706	1061.7	3665.46	1040.06	378.7	1034.64	387.511	1033.86	473.932	1033.86	602.922
1034.57	0.985708	1073.97	102.721	1073.2	118.853	1073.2	202.28	1074.74	605.768	1075.58	1422.39	1045.47	585.866	937.616	28.94	940.755	-4.23244	1045.47	86.3963	1062.47	3778.31	1040.83	410.472	1035.41	497.543	1034.64	512.704	1034.64	634.186
1035.34	0.656391	1074.74	115.584	1073.97	134.533	1073.97	234.8	1075.51	704.527	1076.35	1692.17	1046.25	641.696	938.4	19.6862	941.538	-1.99817	1046.25	95.6321	1063.24	3872.02	1041.61	450.643	1036.19	535.127	1035.41	574.533	1035.41	734.242
1036.12	0.376728	1075.51	129.468	1074.74	153.284	1074.74	273.721	1076.28	830.785	1077.12	2059.33	1047.02	701.263	939.186	16.9233	942.322	0.973172	1047.02	107.409	1064.01	3938.11	1042.38	495.226	1036.96	630.856	1036.19	665.132	1036.19	838.734
1036.89	-0.1842	1076.28	145.533	1075.51	176.128	1075.51	321.384	1077.05	990.037	1077.89	2478.4	1047.79	762.536	939.971	24.7109	943.106	2.89264	1047.79	121.226	1064.78	3972.43	1043.15	544.937	1037.74	674.93	1036.96	753.242	1036.96	950.638
1037.67	0.269412	1077.05	164.231	1076.28	203.563	1076.28	379.592	1077.82	1192.91	1078.66	2935.46	1048.57	851.464	940.755	36.9413	943.89	2.87921	1048.57	136.396	1065.56	3999.49	1043.93	598.019	1038.51	744.697	1037.74	812.875	1037.74	1031.42
1038.44	0.375447	1077.82	187.173	1077.05	235.107	1077.05	453.316	1078.59	1445.21	1079.43	3406.8	1049.34	973.426	941.538	48.4496	944.674	-0.0172752	1049.34	152.881	1066.33	4005.67	1044.7	655.213	1039.28	809.601	1038.51	877.938	1038.51	1133.91
1039.21	0.410044	1078.59	213.487	1077.82	273.694	1077.82	545.401	1079.36	1779.8	1080.2	3834.3	1050.11	1100.95	942.322	48.328	945.457	4.44742	1050.11	169.642	1067.1	3985.7	1045.47	721.004	1040.06	856.84	1039.28	935.468	1039.28	1232.66
1039.99	0.650945	1079.36	245.353	1078.59	319.743	1078.59	657.506	1080.13	2202.01	1080.97	4013.05	1050.89	1253.37	943.106	51.7171	946.241	7.87175	1050.89	187.721	1067.87	3908.31	1046.25	793.487	1040.83	908.53	1040.06	1037.24	1040.06	1322.34
1040.76	0.607699	1080.13	282.029	1079.36	377.269	1079.36	798.067	1080.9	2731.03	1081.74	3820.46	1051.66	1395.77	943.89	52.7744	947.024	10.9525	1051.66	204.485	1068.64	3796.38	1047.02	870.764	1041.61	985.897	1040.83	1185.86	1040.83	1460.07
1041.54	0.419014	1080.9	325.405	1080.13	445.715	1080.13	982.069	1081.67	3323.87	1082.51	3327.56	1052.43	1544.41	944.674	50.7114	947.808	13.5937	1052.43	221.014	1069.41	3655.79	1047.79	958.207	1042.38	1149.77	1041.61	1361.6	1041.61	1616.08
1042.31	0.567975	1081.67	383.279	1080.9	535.494	1080.9	1240.7	1082.44	3851.04	1083.28	2723.82	1053.2	1712.71	945.457	42.6733	948.591	17.6112	1053.2	240.337	1070.18	3486.56	1048.57	1070.29	1043.15	1390.8	1042.38	1585.43	1042.38	1821.78
1043.09	0.595846	1082.44	455.452	1081.67	660.624	1081.67	1617.07	1083.21	3994.97	1084.05	2061.32	1053.98	1894.3	946.241	38.4185	949.374	24.6403	1053.98	260.37	1070.95	3290.27	1049.34	1190.34	1043.93	1626.1	1043.15	1815.09	1043.15	2055.59
1043.86	0.861093	1083.21	556.396	1082.44	830.214	1082.44	2162.58	1083.98	3655.51	1084.82	1544.36	1054.75	2081.47	947.024	30.8482	950.157	33.8806	1054.75	281.026	1071.72	3109.9	1050.11	1316.42	1044.7	1830.52	1043.93	1994.78	1043.93	2290.25
1044.63	1.05683	1083.98	705.217	1083.21	1081.6	1083.21	2870.53	1084.75	2965.45	1085.58	1200.12	1055.52	2269.13	947.808	25.8529	950.941	37.541	1055.52	300.94	1072.5	2915.54	1050.89	1458.7	1045.47	1977.66	1044.7	2252.25	1044.7	2524.07
1045.41	1.32656	1084.75	944.99	1083.98	1481.52	1083.98	3600.28	1085.52	2219.32	1086.35	920.478	1056.3	2453.79	948.591	30.2551	951.724	35.6369	1056.3	318.06	1073.27	2731.11	1051.66	1607.13	1046.25	2140.79	1045.47	2506.32	1045.47	2780.86
1046.18	1.4941	1085.52	1338.45	1084.75	2113.97	1084.75	3985.4	1086.29	1600.79	1087.12	708.639	1057.07	2619.48	949.374	39.3173	952.507	29.9111	1057.07	333.734	1074.04	2554.01	1052.43	1765.19	1047.02	2357.1	1046.25	2763.66	1046.25	3054.41
1046.95	1.39607	1086.29	2017.5	1085.52	2984.39	1085.52	3691.6	1087.05	1157.47	1087.89	554.397	1057.84	2781.01	950.157	49.982	953.29	24.4157	1057.84	352.495	1074.81	2357.34	1053.2	1923.27	1047.79	2640.66	1047.02	3068.94	1047.02	3253.84
1047.72	1.74237	1087.05	3071.15	1086.29	3837.35	1086.29	2846.25	1087.82	855.447	1088.66	446.801	1058.61	2981.69	950.941	42.9091	954.072	17.5996	1058.61	368.965	1075.58	2196.45	1053.98	2095.45	1048.57	2922.4	1047.79	3397.74	1047.79	3532.76
1048.5	2.00313	1087.82	3993.82	1087.05	4000.99	1087.05	1966.23	1088.59	649.157	1089.43	366.774	1059.38	3149.53	951.724	42.828	954.855	12.4247	1059.38	388.07	1076.35	2037.1	1054.75	2277.83	1049.34	3136.08	1048.57	3674.45	1048.57	3823.69
1049.27	2.17291	1088.59	3993.74	1087.82	3247.73	1087.82	1305.01	1089.36	500.67	1090.2	306.618	1060.15	3296.6	952.507	43.4469	955.638	3.89461	1060.15	407.023	1077.12	1877.06	1055.52	2458.43	1050.11	3368.21	1049.34	3862.18	1049.34	3994.14
1050.04	2.0877	1089.36	2953.65	1088.59	2193.72	1088.59	876.163	1090.13	396.078	1090.97	262.608	1060.93	3435.3	953.29	50.0668	956.421	-1.73328	1060.93	427.053	1077.89	1720.99	1056.3	2629.41	1050.89	3587.17	1050.11	3956.12	1050.11	4012.57
1050.82	2.02011	1090.13	1805.67	1089.36	1358.63	1089.36	617.305	1090.9	321.554	1091.74	227.335	1061.7	3564.55	954.072	47.9596	957.203	-0.575842	1061.7	450.04	1078.66	1569.2	1057.07	2795.26	1051.66	3813.31	1050.89	3945.32	1050.89	3901.18
1051.59	1.90927	1090.9	1048.61	1090.13	847.316	1090.13	453.336	1091.67	268.804	1092.51	201.948	1062.47	3701.49	954.855	47.4513	957.986	-0.39925	1062.47	472.766	1079.43	1425.99	1057.84	2957.04	1052.43	3999.69	1051.66	3832.18	1051.66	3739.69
1052.36	2.04606	1091.67	631.266	1090.9	560.703	1090.9	345.64	1092.44	223.252	1093.27	180.023	1063.24	3793.66	955.638	48.6153	958.768	3.44353	1063.24	494.973	1080.2	1293.9	1058.61	3124.89	1053.2	3964.38	1052.43	3600.01	1052.43	3464.51
1053.14	2.28375	1092.44	396.85	1091.67	385.948	1091.67	274.476	1093.2	187.53	1094.04	163.459	1064.01	3889.31	956.421	36.7092	959.55	5.54151	1064.01	518.985	1080.97	1180.84	1059.38	3285.63	1053.98	3917.11	1053.2	3244.99	1053.2	3090.67
1053.91	2.54484	1093.2	264.354	1092.44	282.743	1092.44	218.859	1093.97	159.795	1094.81	148.582	1064.78	3956.39	957.203	44.9278	960.333	5.34189	1064.78	542.888	1081.74	1091.79	1060.15	3435.46	1054.75	3748.86	1053.98	2802.28	1053.98	2681
1054.68	2.88376	1093.97	188.376	1093.2	215.238	1093.2	182.599	1094.74	137.626	1095.58	134.281	1065.56	3981.32	957.986	44.2242	961.115	0.760111	1065.56	567.203	1082.51	1001.01	1060.93	3556.22	1055.52	3604.85	1054.75	2343.94	1054.75	2263.32
1055.45	3.46552	1094.74	139.207	1093.97	171.162	1093.97	150.643	1095.51	117.674	1096.35	117.863	1066.33	3966.94	958.768	30.0083	961.897	-4.46469	1066.33	597.177	1083.28	915.757	1061.7	3626.28	1056.3	3451.89	1055.52	1919.87	1055.52	1857.91
1056.23	4.11838	1095.51	111.779	1094.74	137.534	1094.74	126.157	1096.28	103.602	1097.12	103.146	1067.1	3914.32	959.55	25.6945	962.677	1.57013	1067.1	627.033	1084.05	828.518	1062.47	3778.19	1057.07	3445.38	1056.3	1547.13	1056.3	1460.99
1057	4.92053	1096.28	87.2168	1095.51	112.571	1095.51	107.718	1097.05	91.7459	1097.88	94.4734	1067.87	3834.28	960.333	21.9002	963.459	8.25757	1067.87	657.766	1084.82	736.055	1063.24	3905.34	1057.84	3378.53	1057.07	1223.43	1057.07	1181.84
1057.77	6.19167	1097.05	70.9582	1096.28	93.3345	1096.28	93.2954	1097.82	82.2154	1098.65	89.367	1068.64	3730.06	961.115	24.7146	964.241	11.6109	1068.64	693.404	1085.58	669.012	1064.01	3964.63	1058.61	3351.74	1057.84	960.976	1057.84	954.122
1058.54	8.25438	1097.82	56.826	1097.05	79.3391	1097.05	81.2375	1098.58	73.3313	1099.42	87.0554	1069.41	3602.92	961.897	27.3559	965.023	3.72761	1069.41	730.66	1086.35	620.52	1064.78	3999.17	1059.38	3278.38	1058.61	773.387	1058.61	810.375
1059.31	10.2476	1098.58	46.7163	1097.82	68.378	1097.82	71.3504	1099.35	64.592	1100.19	83.203	1070.18	3454.44	962.677	31.4708	965.805	-9.04839	1070.18	775.335	1087.12	581.242	1065.56	4001.83	1060.15	3245.36	1059.38	591.812	1059.38	703.341
1060.09	11.9131	1099.35	39.9544	1098.58	59.7909	1098.58	63.064	1100.12	57.3773	1100.96	75.3328	1070.95	3292.57	963.459	49.1753	966.587	-12.5572	1070.95	829.107	1087.89	536.721	1066.33	3981.71	1060.93	3186.73	1060.15	541.04	1060.15	641.63
1060.86	13.1829	1100.12	35.6561	1099.35	52.4734	1099.35	55.3418	1100.89	51.0048	1101.72	67.6168	1071.72	3116	964.241	61.1035	967.368	-13.897	1071.72	891.412	1088.66	492.667	1067.1	3927.51	1061.7	3164.58	1060.93	459.029	1060.93	563.863
1061.63	13.5385	1100.89	32.2445	1100.12	47.004	1100.12	48.4971	1101.65	45.0835	1102.49	58.9777	1072.5	2937.82	965.023	67.3366	968.15	-1.2227	1072.5	965.047	1089.43	456.633	1067.87	3823.83	1062.47	3177.08	1061.7	376.15	1061.7	483.885
1062.4	12.8075	1101.65	28.5351	1100.89	42.1686	1100.89	41.9151	1102.42	40.1083	1103.26	51.0539	1073.27	2764.01	965.805	67.6792	968.932	3.51647	1073.27	1054.78	1090.2	433.978	1068.64	3693.6	1063.24	3245.07	1062.47	350.905	1062.47	416.591
1063.17	12.0931	1102.42	23.7436	1101.65	37.6753	1101.65	36.8723	1103.19	36.1323	1104.03	45.8299	1074.04	2614.65	966.587	56.344	969.711	8.67601	1074.04	1170.91	1090.97	413.045	1069.41	3528.7	1064.01	3253.82	1063.24	327.32	1063.24	342.092
1063.94	13.1131	1103.19	19.2834	1102.42	34.0382	1102.42	32.7675	1103.96	32.4064	1104.79	44.4098	1074.81	2465.18	967.368	49.621	970.493	9.70293	1074.81	1322.49	1091.74	386.227	1070.18	3349.55	1064.78	3230.59	1064.01	279.395	1064.01	280.774
1064.72	16.2483	1103.96	15.7129	1103.19	30.8654	1103.19	29.3668	1104.72	29.7913	1105.56	42.0783	1075.58	2328.54	968.15	42.817	971.274	-1.76975	1075.58	1519.48	1092.51	354.739	1070.95	3142.73	1065.56	3215.68	1064.78	217.095	1064.78	272.741
1065.49	20.2834	1104.72	13.4188	1103.96	27.6274	1103.96	25.8927	1105.49	26.9884	1106.33	40.4193	1076.35	2233.68	968.932	47.3739	972.055	-4.04241	1076.35	1759.33	1093.27	323.192	1071.72	2929.73	1066.33	3147.77	1065.56	172.196	1065.56	266.196
1066.26	21.1109	1105.49	11.0017	1104.72	24.9608	1104.72	22.9635	1106.26	25.0293	1107.1	40.6743	1077.12	2100.34	969.711	50.3062	972.836	2.68534	1077.12	2073.42	1094.04	293.858	1072.5	2750.03	1067.1	3068.81	1066.33	153.22	1066.33	273.113
1067.03	19.8785	1106.26	10.0884	1105.49	22.7797	1105.49	21.7504	1107.03	23.4583	1107.86	39.2896	1077.89	1985.32	970.493	39.9252	973.618	8.14816	1077.89	2452.39	1094.81	270.966	1073.27	2590.45	1067.87	3020.52	1067.1	136.337	1067.1	276.545
1067.8	17.2821	1107.03	9.17243	1106.26	20.575	1106.26	19.5712	1107.79	21.3953	1108.63	36.7373	1078.66	1882.43	971.274	36.5361	974.397	-9.27873	1078.66	2874.32	1095.58	252.51	1074.04	2412.08	1068.64	2984.92	1067.87	136.224	1067.87	297.512
1068.57	15.8101	1107.79	7.51305	1107.03	19.13	1107.03	17.1291	1108.56	19.3577	1109.4	33.4069	1079.43	1763.1	972.055	32.0897	975.178	-10.5245	1079.43	3348.12	1096.35	239.572	1074.81	2230.58	1069.41	2920.11	1068.64	123.8	1068.64	257.481
1069.34	15.4773	1108.56	6.39267	1107.79	17.8297	1107.79	14.9887	1109.33	18.7401	1110.16	32.9447	1080.2	1644.57	972.836	25.6098	975.959	-12.5572	1080.2	3777.24	1097.12	229.595	1075.58	2062.05	1070.18	2823.16	1069.41	78.0994	1069.41	284.63
1070.11	16.051	1109.33	5.76462	1108.56	16.6909	1108.56	13.7256	1110.09	16.9421	1110.93	31.8399	1080.97	1511.76	973.618	28.1001	976.74	-10.3939	1080.97	3988.7	1097.88	219.382	1076.35	1891.55	1070.95	2678.42	1070.18	26.1211	1070.18	240.557
1070.88	18.4398	1110.09	5.0594	1109.33	15.7055	1109.33	12.6963	1110.86	15.6102	1111.7	32.1683	1081.74	1379.23	974.397	27.8938	977.52	-0.497143	1081.74	3767.24	1098.65	210.253	1077.12	1728.76	1071.72	2482.71	1070.95	37.697	1070.95	195.367
1071.66	21.5238	1110.86	5.02109	1110.09	14.4113	1110.09	12.6155	1111.63	13.641	1112.46	31.4138	1082.51	1244.77	975.178	25.864	978.299	5.92349	1082.51	3273.26	1099.42	202.693	1077.89	1597.28	1072.5	2328.91	1071.72	5.63711	1071.72	182.206
1072.43	25.4394	1111.63	3.8942	1110.86	13.1542	1110.86	13.3583	1112.39	11.6926	1113.23	32.1292	1083.28	1117.47	975.959	25.6356	979.08	8.69713	1083.28	2609.49	1100.19	194.482	1078.66	1476.46	1073.27	2171.31	1072.5	-31.2492	1072.5	211.278
1073.2	29.9951	1112.39	3.10017	1111.63	12.1072	1111.63	12.1371	1113.16	9.46359	1114	31.2558	1084.05	990.745	976.74	23.6021	979.86	4.97335	1084.05	1992.03	1100.96	180.706	1079.43	1360.43	1074.04	2014.9	1073.27	-42.3726	1073.27	162.822
1073.97	35.0152	1113.16	1.47701	1112.39	11.7015	1112.39	10.5547	1113.93	8.02574	1114.76	31.3472	1084.82	886.435	977.52	19.0636	980.641	24.5673	1084.82	1486.55	1101.72	168.147	1080.2	1245.78	1074.81	1881.02	1074.04	-42.1841	1074.04	114.902
1074.74	39.5811	1113.93	1.35126	1113.16	10.8783	1113.16	9.76716	1114.69	7.88333	1115.53	27.7804	1085.58	786.72	978.299	25.9745	981.421	15.3155	1085.58	1131.53	1102.49	156.309	1080.97	1124.18	1075.58	1747.24	1074.81	-14.9035	1074.81	86.9264
1075.51	43.3263	1114.69	1.20213	1113.93	10.2723	1113.93	9.67551	1115.46	6.38411	1116.29	19.9761	1086.35	696.371	979.08	39.9878	982.2	-19.1544	1086.35	888.189	1103.26	140.452	1081.74	1024.68	1076.35	1638.12	1075.58	-20.3615	1075.58	70.6432
1076.28	46.4199	1115.46	1.14857	1114.69	10.0983	1114.69	9.51131	1116.23	4.83077	1117.06	17.2372	1087.12	617.98	979.86	35.0736	982.98	1.32252	1087.12	696.483	1104.03	127.63	1082.51	921.784	1077.12	1548.58	1076.35	97.2826	1076.35	92.9744
1077.05	50.34	1116.23	0.752116	1115.46	9.80031	1115.46	8.26956	1116.99	3.45671	1117.83	18.5858	1087.89	551.408	980.641	33.9868	983.76	14.2809	1087.89	553.924	1104.79	116.479	1083.28	828.116	1077.89	1460.97	1077.12	72.6603	1077.12	109.144
1077.82	55.3646	1116.99	1.19555	1116.23	9.2302	1116.23	7.41114	1117.76	3.69766	1118.59	21.4553	1088.66	488.908	981.421	46.0146	984.541	20.3176	1088.66	451.984	1105.56	106.78	1084.05	744.099	1078.66	1346.91	1077.89	29.8541	1077.89	119.11
1078.59	63.883	1117.76	-0.056212	1116.99	8.66213	1116.99	7.5	1118.52	3.70364	1119.36	24.216	1089.43	451.217	982.2	22.4564	985.319	11.9909	1089.43	379.827	1106.33	99.5135	1084.82	686.055	1079.43	1188.87	1078.66	-33.3985	1078.66	120.64
1079.36	77.0861	1118.52	-0.785843	1117.76	7.5978	1117.76	8.20603	1119.29	5.13921	1120.13	24.5874	1090.2	421.967	982.98	26.9912	986.099	5.2248	1090.2	323.286	1107.1	98.0342	1085.58	629.275	1080.2	1061.73	1079.43	-76.7703	1079.43	156.339
1080.13	90.6848	1119.29	-1.91699	1118.52	6.90021	1118.52	8.1352	1120.05	6.69796	1120.89	26.5935	1090.97	408.118	983.76	19.4504	986.879	18.8799	1090.97	279.202	1107.86	97.3094	1086.35	582.658	1080.97	945.882	1080.2	-114.166	1080.2	186.311
1080.9	105.827	1120.05	-2.41864	1119.29	6.45331	1119.29	6.39668	1120.82	5.64361	1121.66	26.8635	1091.74	376.008	984.541	9.30516	987.657	14.7684	1091.74	243.326	1108.63	93.8476	1087.12	539.869	1081.74	819.918	1080.97	-117.729	1080.97	221.875
1081.67	120.608	1120.82	-2.72162	1120.05	7.11948	1120.05	5.26396	1121.59	3.91554	1122.42	27.3082	1092.51	355.117	985.319	7.22379	988.437	11.8873	1092.51	212.923	1109.4	87.0354	1087.89	502.05	1082.51	736.276	1081.74	-124.262	1081.74	214.959
1082.44	137.685	1121.59	-3.51269	1120.82	7.68388	1120.82	6.14052	1122.35	2.53963	1123.19	26.0293	1093.27	316.344	986.099	-3.20514	989.216	5.12307	1093.27	185.295	1110.16	82.3471	1088.66	471.3	1083.28	730.983	1082.51	-110.188	1082.51	171.454
1083.21	162.363	1122.35	-3.28182	1121.59	8.40472	1121.59	6.81435	1123.12	0.623159	1123.95	23.4807	1094.04	290.081	986.879	-8.47303	989.996	2.96558	1094.04	162.785	1110.93	73.5362	1089.43	442.199	1084.05	712.781	1083.28	-100.092	1083.28	141.566
1083.98	196.446	1123.12	-3.27611	1122.35	8.39983	1122.35	6.26415	1123.88	-0.391041	1124.72	22.1844	1094.81	264.328	987.657	-3.87192	990.774	-4.4954	1094.81	145.439	1111.7	74.5614	1090.2	413.974	1084.82	672.82	1084.05	-87.083	1084.05	112.256
1084.75	244.614	1123.88	-2.11598	1123.12	8.53975	1123.12	5.19785	1124.65	-0.851575	1125.48	14.5493	1095.58	248.787	988.437	-1.81634	991.553	-9.58008	1095.58	131.788	1112.46	76.828	1090.97	390.897	1085.58	607.898	1084.82	-60.4057	1084.82	80.289
1085.52	326.798	1124.65	-0.431065	1123.88	8.84857	1123.88	3.06108	1125.41	-0.585422	1126.25	16.5691	1096.35	219.205	989.216	1.7975	992.333	-16.805	1096.35	120.411	1113.23	76.8851	1091.74	363.763	1086.35	544.8	1085.58	-51.0828	1085.58	-7.31968
1086.29	453.358	1125.41	-0.261145	1124.65	8.88528	1124.65	2.0037	1126.18	0.0952682	1127.01	17.4698	1097.12	200.078	989.996	7.23116	993.11	-23.8398	1097.12	112.529	1114	76.8389	1092.51	333.626	1087.12	509.505	1086.35	0.141399	1086.35	45.9031
1087.05	664.387	1126.18	-0.281943	1125.41	7.66715	1125.41	1.77587	1126.94	1.032	1127.78	20.4743	1097.88	208.419	990.774	10.1119	993.89	-9.27297	1097.88	104.913	1114.76	72.7938	1093.27	312.891	1087.89	527.814	1087.12	2.00787	1087.12	49.0873
1087.82	1124.75	1126.94	0.0248939	1126.18	6.7764	1126.18	2.01636	1127.71	1.16999	1128.54	21.52	1098.65	217.232	991.553	-2.83676	994.669	9.28257	1098.65	97.6989	1115.53	67.8498	1094.04	295.285	1088.66	534.197	1087.89	-33.7095	1087.89	31.7083
1088.59	2190.31	1127.71	-0.210795	1126.94	6.04699	1126.94	0.534541	1128.47	1.70699	1129.31	20.7288	1099.42	204.068	992.333	-21.1417	995.446	17.018	1099.42	89.113	1116.29	61.1519	1094.81	274.843	1089.43	488.139	1088.66	-68.5503	1088.66	-2.27448
1089.36	3710.56	1128.47	-0.40039	1127.71	6.01476	1127.71	0.88085	1129.24	0.844312	1130.07	18.4943	1100.19	184.728	993.11	-23.2341	996.225	12.4228	1100.19	79.2436	1117.06	54.9638	1095.58	252.895	1090.2	364.517	1089.43	-90.1655	1089.43	-27.4902
1090.13	3981.89	1129.24	-0.708993	1128.47	6.41292	1128.47	0.346845	1130	0.248637	1130.84	16.4614	1100.96	160.652	993.89	-16.2422	997.005	15.2252	1100.96	70.0519	1117.83	53.8475	1096.35	234.341	1090.97	303.314	1090.2	-72.2549	1090.2	-59.7774
1090.9	2553.48	1130	-0.675909	1129.24	6.6891	1129.24	0.219783	1130.77	0.0179429	1131.6	15.57	1101.72	139.895	994.669	-9.01455	997.782	13.9565	1101.72	64.6446	1118.59	53.8855	1097.12	216.67	1091.74	269.468	1090.97	-72.6037	1090.97	-110.56
1091.67	1265.92	1130.77	-0.964356	1130	8.01778	1130	-0.035307	1131.53	0.408272	1132.37	15.7312	1102.49	110.4	995.446	2.44217	998.561	8.8526	1102.49	59.1632	1119.36	52.0581	1097.88	206.627	1092.51	232.564	1091.74	-72.8299	1091.74	-74.0652
1092.44	640.746	1131.53	-1.40755	1130.77	8.61277	1130.77	0.0182437	1132.3	0.164904	1133.13	15.0139	1103.26	78.9209	996.225	7.92372	999.339	3.38595	1103.26	54.419	1120.13	53.0575	1098.65	195.56	1093.27	228.773	1092.51	-75.7711	1092.51	-53.0677
1093.2	359.27	1132.3	-1.24694	1131.53	9.42826	1131.53	-0.884606	1133.06	-0.170315	1133.9	13.3207	1104.03	56.2515	997.005	9.09886	1000.12	-1.62579	1104.03	50.8453	1120.89	53.8801	1099.42	186.766	1094.04	203.241	1093.27	-67.9375	1093.27	-90.4828
1093.97	218.668	1133.06	-1.18166	1132.3	9.50903	1132.3	-1.87288	1133.83	-1.45024	1134.66	11.7954	1104.79	51.4175	997.782	14.503	1000.9	-4.2977	1104.79	45.3634	1121.66	52.9541	1100.19	180.372	1094.81	181.177	1094.04	-47.8777	1094.04	-47.5883
1094.74	140.847	1133.83	-1.23112	1133.06	8.22767	1133.06	-2.00874	1134.59	-1.43942	1135.42	16.0266	1105.56	53.867	998.561	13.0369	1001.67	-2.21699	1105.56	40.716	1122.42	47.6757	1100.96	166.218	1095.58	155.501	1094.81	-15.2994	1094.81	-26.2599
1095.51	99.6619	1134.59	-1.91273	1133.83	8.43124	1133.83	-2.11584	1135.36	-2.01872	1136.19	20.5583	1106.33	72.0811	999.339	8.20737	1002.45	1.67954	1106.33	38.1962	1123.19	44.5701	1101.72	150.36	1096.35	186.952	1095.58	10.2561	1095.58	-0.124062
1096.28	73.7359	1135.36	-2.63586	1134.59	6.08962	1134.59	-2.05081	1136.12	-2.69044	1136.95	23.6431	1107.1	89.3899	1000.12	13.8363	1003.23	0.464512	1107.1	37.3173	1123.95	43.0309	1102.49	135.094	1097.12	251.516	1096.35	11.1045	1096.35	7.18528
1097.05	57.4981	1136.12	-2.00926	1135.36	5.68453	1135.36	-1.26569	1136.88	-3.32228	1137.72	23.9218	1107.86	97.2073	1000.9	18.8573	1004.01	4.50308	1107.86	37.3944	1124.72	40.3808	1103.26	122.47	1097.88	313.685	1097.12	-12.7542	1097.12	77.4356
1097.82	46.606	1136.88	-2.34605	1136.12	4.97532	1136.12	-0.900274	1137.65	-1.85865	1138.48	25.0184	1108.63	93.1633	1001.67	17.8295	1004.78	3.19976	1108.63	36.7852	1125.48	36.6172	1104.03	119.214	1098.65	338.645	1097.88	-9.12495	1097.88	123.463
1098.58	38.6726	1137.65	-2.17757	1136.88	4.91576	1136.88	-1.88672	1138.41	-0.510091	1139.25	25.8004	1109.4	84.3466	1002.45	4.39461	1005.56	6.82948	1109.4	32.9854	1126.25	29.3182	1104.79	112.707	1099.42	319.281	1098.65	1.5931	1098.65	143.23
1099.35	33.2299	1138.41	-2.58077	1137.65	4.94594	1137.65	-1.41443	1139.18	-2.06842	1140.01	23.3756	1110.16	81.0638	1003.23	-1.93422	1006.34	16.089	1110.16	31.6001	1127.01	22.782	1105.56	109.072	1100.19	227.647	1099.42	-15.9404	1099.42	127.102
1100.12	28.4475	1139.18	-2.53323	1138.41	4.92983	1138.41	-1.07531	1139.94	-0.637684	1140.77	19.4629	1110.93	74.7868	1004.01	-20.6334	1007.11	11.5648	1110.93	31.246	1127.78	22.2953	1106.33	103.728	1100.96	160.383	1100.19	-34.6239	1100.19	93.5637
1100.89	24.4441	1139.94	-2.75366	1139.18	4.68241	1139.18	-0.739408	1140.7	0.833062	1141.54	16.9037	1111.7	49.5741	1004.78	-8.46198	1007.89	7.04062	1111.7	30.6142	1128.54	18.556	1107.1	101.472	1101.72	139.463	1100.96	-60.6319	1100.96	2.58463
1101.65	21.371	1140.7	-2.67135	1139.94	4.96634	1139.94	-0.668364	1141.47	2.6329	1142.3	16.2425	1112.46	31.0713	1005.56	-6.24062	1008.67	20.8128	1112.46	30.1099	1129.31	30.3869	1107.86	106.457	1102.49	127.037	1101.72	-88.8552	1101.72	-62.8789
1102.42	18.9975	1141.47	-2.01488	1140.7	5.69269	1140.7	0.0431411	1142.23	3.01768	1143.06	13.0638	1113.23	26.5078	1006.34	5.79446	1009.45	23.0452	1113.23	27.412	1130.07	32.4469	1108.63	103.416	1103.26	71.8056	1102.49	-116.843	1102.49	-101.111
1103.19	17.1046	1142.23	-1.89025	1141.47	5.54134	1141.47	0.589594	1142.99	2.83854	1143.83	13.2709	1114	26.8325	1007.11	16.0945	1010.23	26.1931	1114	24.6238	1130.84	32.451	1109.4	100.523	1104.03	94.2985	1103.26	-128.117	1103.26	-107.128
1103.96	15.5769	1142.99	-2.32059	1142.23	5.06649	1142.23	0.222574	1143.76	2.54988	1144.59	16.0098	1114.76	28.0121	1007.89	30.3288	1011	31.3373	1114.76	22.893	1131.6	31.54	1110.16	92.6013	1104.79	109.389	1104.03	-125.449	1104.03	-68.6892
1104.72	14.0312	1143.76	-3.34951	1142.99	4.98715	1142.99	-0.256378	1144.52	2.3612	1145.35	17.4418	1115.53	32.9363	1008.67	43.9406	1011.78	37.5929	1115.53	20.4413	1132.37	30.032	1110.93	82.629	1105.56	143.146	1104.79	-119.124	1104.79	-5.22096
1105.49	12.6784	1144.52	-3.14426	1143.76	4.97736	1143.76	0.0385265	1145.28	2.2272	1146.12	18.1298	1116.29	43.3295	1009.45	49.481	1012.55	38.0439	1116.29	18.6989	1133.13	27.4336	1111.7	73.9174	1106.33	132.919	1105.56	-106.813	1105.56	59.8498
1106.26	11.3893	1145.28	-2.8053	1144.52	4.55921	1144.52	0.543556	1146.05	1.79585	1146.88	17.0711	1117.06	48.0012	1010.23	58.046	1013.33	32.9996	1117.06	18.0349	1133.9	26.4397	1112.46	64.5222	1107.1	157.611	1106.33	-117.333	1106.33	110.116
1107.03	10.148	1146.05	-2.42049	1145.28	3.74842	1145.28	0.114721	1146.81	1.9263	1147.64	15.6683	1117.83	48.6794	1011	55.261	1014.11	15.517	1117.83	16.9702	1134.66	21.2102	1113.23	54.8992	1107.86	161.902	1107.1	-90.9102	1107.1	161.819
1107.79	8.61093	1146.81	-2.92728	1146.05	3.19912	1146.05	-0.293617	1147.57	1.43073	1148.41	15.8462	1118.59	38.5063	1011.78	43.4359	1014.89	7.67405	1118.59	17.2618	1135.42	20.3658	1114	42.5827	1108.63	191.011	1107.86	-49.7725	1107.86	152.183
1108.56	7.6957	1147.57	-2.89299	1146.81	2.39954	1146.81	-0.00525849	1148.34	-0.00341769	1149.17	14.1816	1119.36	20.2236	1012.55	29.6989	1015.66	1.57397	1119.36	16.7926	1136.19	14.9909	1114.76	38.2438	1109.4	155.126	1108.63	-7.0511	1108.63	99.3946
1109.33	6.86312	1148.34	-3.65811	1147.57	3.58973	1147.57	0.148203	1149.1	-1.46875	1149.93	9.74387	1120.13	7.70198	1013.33	20.1356	1016.44	7.44179	1120.13	16.3123	1136.95	18.7138	1115.53	37.0166	1110.16	163.833	1109.4	3.04479	1109.4	27.6866
1110.09	6.12632	1149.1	-4.27966	1148.34	4.07661	1148.34	0.00214632	1149.86	-1.23023	1150.69	3.66453	1120.89	-3.92494	1014.11	18.9642	1017.21	11.9986	1120.89	15.4732	1137.72	19.4548	1116.29	37.9841	1110.93	114.932	1110.16	-56.0223	1110.16	18.5887
1110.86	5.27836	1149.86	-2.60069	1149.1	4.29078	1149.1	-0.0871406	1150.62	-0.265441	1151.46	-0.123789	1121.66	-5.03966	1014.89	22.2501	1017.99	24.0184	1121.66	15.8037	1138.48	21.7582	1117.06	41.477	1111.7	59.236	1110.93	-94.6337	1110.93	-37.87
1111.63	4.88914	1150.62	-0.354457	1149.86	4.45845	1149.86	0.0514044	1151.39	-0.114777	1152.22	2.63254	1122.42	-0.165944	1015.66	34.6905	1018.77	32.1512	1122.42	18.6026	1139.25	25.322	1117.83	47.1963	1112.46	-2.4853	1111.7	-97.4334	1111.7	-35.9264
1112.39	4.71038	1151.39	-0.375094	1150.62	3.58932	1150.62	0.00397069	1152.15	-0.364839	1152.98	6.38415	1123.19	7.06345	1016.44	45.0862	1019.54	41.4951	1123.19	17.7939	1140.01	31.5169	1118.59	47.355	1113.23	-90.061	1112.46	-104.268	1112.46	-81.1575
1113.16	4.63734	1152.15	-0.22798	1151.39	4.10537	1151.39	0.410377	1152.91	-1.08982	1153.74	10.351	1123.95	6.09665	1017.21	51.4077	1020.32	44.8792	1123.95	16.6873	1140.77	36.7681	1119.36	44.6168	1114	-61.8823	1113.23	-90.9856	1113.23	-103.199
1113.93	4.64952	1152.91	-0.00481817	1152.15	4.22082	1152.15	0.481205	1153.67	-1.84555	1154.51	11.4054	1124.72	-2.4098	1017.99	57.5597	1021.1	27.9264	1124.72	15.1144	1141.54	39.5106	1120.13	46.9703	1114.76	0.125159	1114	-76.5912	1114	-141.224
1114.69	4.54893	1153.67	0.0628771	1152.91	4.12291	1152.91	-0.0940089	1154.44	-3.98902	1155.27	12.7428	1125.48	8.21063	1018.77	70.991	1021.87	19.9145	1125.48	13.5271	1142.3	37.6478	1120.89	50.5696	1115.53	3.48658	1114.76	-78.1843	1114.76	-113.682
1115.46	4.26542	1154.44	1.01583	1153.67	3.52262	1153.67	-0.642609	1155.2	-2.90048	1156.03	13.0632	1126.25	-0.476188	1019.54	78.5207	1022.65	-5.5396	1126.25	11.6974	1143.06	32.2701	1121.66	51.1243	1116.29	-0.107279	1115.53	-58.6429	1115.53	-73.6
1116.23	3.84128	1155.2	0.130412	1154.44	3.08183	1154.44	-2.01078	1155.96	-2.91686	1156.79	13.2765	1127.01	6.00646	1020.32	71.5951	1023.42	4.90809	1127.01	11.0047	1143.83	26.1623	1122.42	45.7244	1117.06	-10.4419	1116.29	-81.9643	1116.29	23.3651
1116.99	3.41042	1155.96	-0.339761	1155.2	3.3935	1155.2	-0.846724	1156.72	-2.19701	1157.56	14.1238	1127.78	12.3556	1021.1	64.2311	1024.2	-14.9796	1127.78	9.88265	1144.59	19.3229	1123.19	37.4406	1117.83	-6.93739	1117.06	-102.401	1117.06	62.2586
1117.76	3.13684	1156.72	-0.138522	1155.96	3.43267	1155.96	-0.2787	1157.49	-1.36451	1158.32	13.4352	1128.54	6.52233	1021.87	67.5429	1024.97	-0.704446	1128.54	9.9931	1145.35	12.0321	1123.95	34.9788	1118.59	16.5389	1117.83	-118.653	1117.83	101.452
1118.52	3.0859	1157.49	0.553929	1156.72	3.21503	1156.72	-0.140369	1158.25	0.0195093	1159.08	11.2816	1129.31	-23.9609	1022.65	69.3553	1025.75	21.9031	1129.31	11.1995	1146.12	10.7037	1124.72	34.1345	1119.36	51.4225	1118.59	-108.491	1118.59	133.698
1119.29	2.7835	1158.25	0.241149	1157.49	2.77975	1157.49	-0.0724383	1159.01	1.34486	1159.84	8.48048	1130.07	-26.9335	1023.42	70.8583	1026.52	26.9705	1130.07	10.6841	1146.88	16.1901	1125.48	36.1462	1120.13	81.1568	1119.36	-77.2699	1119.36	137.564
1120.05	2.6371	1159.01	-0.596329	1158.25	2.11622	1158.25	-0.462318	1159.77	1.87275	1160.6	5.69616	1130.84	-19.1125	1024.2	65.6789	1027.3	18.8396	1130.84	9.59797	1147.64	23.1614	1126.25	33.6545	1120.89	48.7942	1120.13	-53.0152	1120.13	121.933
1120.82	2.47628	1159.77	-1.61023	1159.01	1.7401	1159.01	-1.16341	1160.53	2.60556	1161.36	4.59761	1131.6	-22.8426	1024.97	65.5278	1028.08	12.5054	1131.6	9.10009	1148.41	24.6843	1127.01	30.6847	1121.66	22.5465	1120.89	-24.7637	1120.89	110.178
1121.59	2.30137	1160.53	-3.10932	1159.77	0.823236	1159.77	-0.907786	1161.29	2.04221	1162.13	3.66266	1132.37	-24.1521	1025.75	76.863	1028.85	9.80082	1132.37	8.31196	1149.17	20.6038	1127.78	27.8063	1122.42	23.2081	1121.66	-9.58686	1121.66	109.775
1122.35	2.11237	1161.29	-3.70798	1160.53	0.53339	1160.53	-0.144769	1162.06	1.39214	1162.89	6.74868	1133.13	-21.616	1026.52	75.5405	1029.62	4.77373	1133.13	6.63809	1149.93	18.431	1128.54	31.4916	1123.19	44.7533	1122.42	25.301	1122.42	103.023
1123.12	2.00249	1162.06	-3.47197	1161.29	0.799167	1161.29	0.177501	1162.82	3.08475	1163.65	12.3901	1133.9	-14.5309	1027.3	82.805	1030.4	4.27466	1133.9	7.6925	1150.69	13.0166	1129.31	30.836	1123.95	21.0089	1123.19	28.261	1123.19	125.468
1123.88	2.17131	1162.82	-1.85668	1162.06	1.14898	1162.06	1.22158	1163.58	4.42021	1164.41	15.6204	1134.66	-0.721497	1028.08	96.7373	1031.17	10.6396	1134.66	8.90873	1151.46	9.79947	1130.07	30.4755	1124.72	-40.9449	1123.95	53.1283	1123.95	129.221
1124.65	2.17163	1163.58	-0.0795801	1162.82	2.4128	1162.82	1.58881	1164.34	2.72119	1165.17	13.5123	1135.42	10.0324	1028.85	111.182	1031.95	17.1274	1135.42	9.24907	1152.22	7.27312	1130.84	23.6355	1125.48	-81.4071	1124.72	32.6161	1124.72	92.6539
1125.41	2.23154	1164.34	1.27946	1163.58	2.3869	1163.58	1.53559	1165.1	2.19629	1165.93	9.59272	1136.19	14.0115	1029.62	122.296	1032.72	15.3327	1136.19	9.42972	1152.98	5.23763	1131.6	22.8006	1126.25	-107.494	1125.48	-21.257	1125.48	41.5609
1126.18	2.25108	1165.1	1.93128	1164.34	1.27116	1164.34	1.25528	1165.86	2.62721	1166.69	8.35234	1136.95	6.80011	1030.4	131.251	1033.5	6.33234	1136.95	9.60824	1153.74	2.57802	1132.37	21.2372	1127.01	-109.604	1126.25	-63.3091	1126.25	-0.816744
1126.94	2.09443	1165.86	2.78137	1165.1	-0.877493	1165.1	0.833953	1166.62	3.84149	1167.45	9.04406	1137.72	-13.326	1031.17	139.636	1034.27	4.45701	1137.72	10.5817	1154.51	4.80388	1133.13	19.3507	1127.78	-85.2334	1127.01	-53.3169	1127.01	-30.1678
1127.71	2.00377	1166.62	3.28294	1165.86	-0.022641	1165.86	0.0805944	1167.38	4.53912	1168.21	11.021	1138.48	-27.0417	1031.95	154.109	1035.05	10.751	1138.48	10.9097	1155.27	4.84467	1133.9	16.8908	1128.54	-31.2004	1127.78	-18.7684	1127.78	-47.4332
1128.47	1.8971	1167.38	3.28535	1166.62	0.231306	1166.62	0.598072	1168.14	4.46094	1168.98	14.13	1139.25	-35.3028	1032.72	176.271	1035.82	25.0491	1139.25	9.78119	1156.03	6.01674	1134.66	24.0726	1129.31	6.18644	1128.54	9.68112	1128.54	-30.9225
1129.24	1.86154	1168.14	2.83172	1167.38	0.115449	1167.38	1.0107	1168.91	3.89631	1169.74	14.6985	1140.01	-40.8836	1033.5	199.012	1036.6	36.5659	1140.01	7.01782	1156.79	9.18624	1135.42	25.2269	1130.07	11.7113	1129.31	-12.2546	1129.31	9.39773
1130	1.67894	1168.91	2.86649	1168.14	0.0030596	1168.14	0.544736	1169.67	2.6396	1170.5	13.7568	1140.77	-45.0683	1034.27	224.75	1037.37	38.6524	1140.77	4.84351	1157.56	14.088	1136.19	23.4188	1130.84	21.1877	1130.07	-15.1108	1130.07	57.9578
1130.77	1.16863	1169.67	1.43983	1168.91	-0.180924	1168.91	-0.321948	1170.43	1.2533	1171.26	6.86314	1141.54	-47.4276	1035.05	244.849	1038.15	42.1266	1141.54	4.80498	1158.32	17.1447	1136.95	21.1849	1131.6	30.5031	1130.84	-27.6294	1130.84	93.2432
1131.53	1.11032	1170.43	0.532327	1169.67	0.0120344	1169.67	-0.72653	1171.19	1.48556	1172.02	9.20517	1142.3	-35.3714	1035.82	270.898	1038.92	45.8927	1142.3	5.58797	1159.08	20.8376	1137.72	23.1685	1132.37	19.6857	1131.6	-20.3143	1131.6	78.1696
1132.3	1.26345	1171.19	0.00232878	1170.43	-0.100967	1170.43	-1.5549	1171.95	0.319981	1172.78	10.5793	1143.06	-28.8022	1036.6	286.256	1039.69	49.8391	1143.06	8.43654	1159.84	19.6669	1138.48	26.4596	1133.13	-63.1696	1132.37	-16.5437	1132.37	65.5049
1133.06	1.51268	1171.95	-0.465837	1171.19	-0.267409	1171.19	-1.24165	1172.71	-0.0552527	1173.54	10.718	1143.83	-21.6521	1037.37	296.622	1040.47	52.9141	1143.83	9.23237	1160.6	20.0082	1139.25	24.3191	1133.9	-100.27	1133.13	-26.5265	1133.13	54.3393
1133.83	1.58412	1172.71	-1.66155	1171.95	0.0446702	1171.95	-0.982049	1173.47	0.71031	1174.3	10.4947	1144.59	-17.0093	1038.15	301.102	1041.24	57.9373	1144.59	7.90441	1161.36	19.0156	1140.01	24.9262	1134.66	-112.089	1133.9	-37.5367	1133.9	32.3596
1134.59	1.49762	1173.47	-3.37497	1172.71	-0.108718	1172.71	-0.0211413	1174.23	2.32346	1175.06	9.04468	1145.35	-16.7676	1038.92	307.162	1042.02	59.5228	1145.35	7.51998	1162.13	16.5654	1140.77	24.7618	1135.42	-51.4583	1134.66	-60.2926	1134.66	13.6572
1135.36	1.09719	1174.23	-1.9683	1173.47	-0.703096	1173.47	0.683818	1174.99	1.35611	1175.82	7.62889	1146.12	-21.8469	1039.69	351.305	1042.79	61.2964	1146.12	6.89367	1162.89	12.4659	1141.54	20.8039	1136.19	20.5797	1135.42	-57.3515	1135.42	2.30549
1136.12	1.03568	1174.99	0.0634392	1174.23	-1.32909	1174.23	1.23413	1175.75	1.73747	1176.58	8.42698	1146.88	-39.1592	1040.47	396.627	1043.56	61.283	1146.88	6.30589	1163.65	13.9656	1142.3	14.3991	1136.95	35.1876	1136.19	-39.6389	1136.19	4.73505
1136.88	0.814963	1175.75	0.19891	1174.99	-2.41525	1174.99	1.30486	1176.51	3.40245	1177.34	10.3404	1147.64	-47.8569	1041.24	421.659	1044.34	53.9007	1147.64	6.94547	1164.41	13.7644	1143.06	12.1969	1137.72	-94.4058	1136.95	-23.4063	1136.95	7.95033
1137.65	0.328035	1176.51	0.122141	1175.75	-3.73985	1175.75	1.87406	1177.27	2.52653	1178.1	11.1497	1148.41	-14.1053	1042.02	451.638	1045.11	55.2482	1148.41	7.72889	1165.17	16.4172	1143.83	9.37089	1138.48	-91.5986	1137.72	-3.10135	1137.72	3.20494
1138.41	-0.0740002	1177.27	0.103671	1176.51	-3.22115	1176.51	1.79186	1178.03	-0.776243	1178.86	10.0064	1149.17	-12.4963	1042.79	488.705	1045.88	63.6036	1149.17	7.81879	1165.93	18.1114	1144.59	7.22476	1139.25	-86.8247	1138.48	9.30406	1138.48	-18.4853
1139.18	-0.193169	1178.03	0.259378	1177.27	-4.00359	1177.27	-0.514473	1178.79	0.339064	1179.62	9.79737	1149.93	-13.3766	1043.56	539.158	1046.66	81.3491	1149.93	6.72286	1166.69	15.7251	1145.35	10.3552	1140.01	-86.8247	1139.25	-5.4203	1139.25	-14.1534
1139.94	0.188364	1178.79	0.00955603	1178.03	-3.62685	1178.03	-0.418747	1179.55	-0.153796	1180.38	8.99741	1150.69	-26.984	1044.34	592.069	1047.43	104.118	1150.69	6.31831	1167.45	14.2716	1146.12	13.6632	1140.77	-88.6306	1140.01	-27.4031	1140.01	4.26981
1140.7	0.72943	1179.55	-0.014053	1178.79	-2.5411	1178.79	-0.127921	1180.31	-0.840183	1181.14	8.74423	1151.46	-34.2206	1045.11	649.555	1048.2	119.341	1151.46	6.06102	1168.21	14.3368	1146.88	17.9573	1141.54	-58.6639	1140.77	-14.0739	1140.77	-45.5826
1141.47	0.938937	1180.31	-0.290857	1179.55	-1.0166	1179.55	0.433235	1181.07	-0.0113923	1181.9	9.45959	1152.22	-39.9709	1045.88	716.454	1048.98	141.463	1152.22	5.59268	1168.98	11.2924	1147.64	19.0388	1142.3	-15.7164	1141.54	-4.10057	1141.54	15.1356
1142.23	1.17247	1181.07	-0.715578	1180.31	-1.11329	1180.31	0.843075	1181.83	-0.34419	1182.66	7.70478	1152.98	-27.5179	1046.66	792.367	1049.75	156.076	1152.98	5.79988	1169.74	9.19712	1148.41	16.4574	1143.06	-31.7368	1142.3	-0.659862	1142.3	-35.5232
1142.99	1.03056	1181.83	-0.761351	1181.07	-1.44535	1181.07	1.25002	1182.59	-0.916653	1183.42	7.04353	1153.74	-21.7207	1047.43	885.428	1050.52	162.172	1153.74	5.16758	1170.5	15.2479	1149.17	10.4654	1143.83	-91.4019	1143.06	0.0188532	1143.06	-63.2718
1143.76	0.80247	1182.59	-0.52245	1181.83	-1.44943	1181.83	1.01081	1183.35	-2.42827	1184.18	6.29333	1154.51	-16.2734	1048.2	988.8	1051.3	161.715	1154.51	5.97711	1171.26	14.4755	1149.93	3.33034	1144.59	-53.4072	1143.83	-3.45014	1143.83	-69.9402
1144.52	0.633006	1183.35	0.0430423	1182.59	-1.61955	1182.59	0.0391704	1184.11	-2.85591	1184.94	4.68905	1155.27	-16.5115	1048.98	1095.55	1052.07	158.619	1155.27	6.77551	1172.02	17.3867	1150.69	4.48839	1145.35	-19.203	1144.59	-8.09745	1144.59	-127.567
1145.28	0.551638	1184.11	-0.306435	1183.35	-1.6528	1183.35	-0.356611	1184.87	-1.69062	1185.69	4.08193	1156.03	-17.5179	1049.75	1217.54	1052.84	171.374	1156.03	7.88172	1172.78	15.566	1151.46	7.28079	1146.12	-21.1877	1145.35	-8.17287	1145.35	-176.561
1146.05	0.417092	1184.87	-0.51972	1184.11	-0.993758	1184.11	-0.848011	1185.62	-1.21086	1186.45	3.6751	1156.79	-14.8376	1050.52	1336.04	1053.61	186.438	1156.79	7.93566	1173.54	7.79389	1152.22	10.7998	1146.88	-45.4507	1146.12	-7.31505	1146.12	-197.166
1146.81	0.400434	1185.62	-0.730033	1184.87	-0.594582	1184.87	-2.06176	1186.38	-0.75887	1187.21	1.84253	1157.56	-10.7359	1051.3	1491.15	1054.39	193.84	1157.56	7.63342	1174.3	6.00043	1152.98	10.0526	1147.64	-91.9205	1146.88	-12.6788	1146.88	-188.471
1147.57	0.521525	1186.38	-1.28733	1185.62	-0.980908	1185.62	-2.45067	1187.14	0.774392	1187.97	2.10192	1158.32	-7.2294	1052.07	1644.65	1055.16	203.94	1158.32	6.67363	1175.06	3.66715	1153.74	2.39642	1148.41	-114.074	1147.64	-17.7314	1147.64	-177.823
1148.34	0.603534	1187.14	-0.0118848	1186.38	-2.15233	1186.38	-3.14297	1187.9	0.876353	1188.73	1.25717	1159.08	-18.6038	1052.84	1805.92	1055.93	213.159	1159.08	4.38458	1175.82	3.16406	1154.51	5.40176	1149.17	-89.453	1148.41	-16.6097	1148.41	-159.524
1149.1	0.769794	1187.9	0.896661	1187.14	-2.19842	1187.14	-3.99849	1188.66	-1.93128	1189.49	2.68106	1159.84	-42.7956	1053.61	1973.64	1056.7	221.722	1159.84	0.0445222	1176.58	2.81733	1155.27	0.211065	1149.93	-48.9909	1149.17	-22.9632	1149.17	-90.6276
1149.86	0.779725	1188.66	2.2235	1187.9	-2.32203	1187.9	-1.41346	1189.42	0.650928	1190.25	4.10681	1160.6	-41.9478	1054.39	2145.6	1057.47	224.693	1160.6	0.473905	1177.34	6.97942	1156.03	-4.70132	1150.69	-63.3484	1149.93	-22.9821	1149.93	-73.2071
1150.62	0.781967	1189.42	3.10892	1188.66	-1.57835	1188.66	-0.109355	1190.18	0.517923	1191.01	6.01776	1161.36	-26.129	1055.16	2341.23	1058.25	230.279	1161.36	2.32158	1178.1	4.74541	1156.79	-10.5981	1151.46	-63.3484	1150.69	-19.1643	1150.69	-60.1702
1151.39	0.791578	1190.18	3.05086	1189.42	-1.3913	1189.42	0.698306	1190.94	0.0730532	1191.77	6.74184	1162.13	-11.8686	1055.93	2534.43	1059.02	234.999	1162.13	5.58797	1178.86	5.71353	1157.56	-11.1229	1152.22	74.2551	1151.46	-14.451	1151.46	-83.3906
1152.15	0.611543	1190.94	3.27764	1190.18	-1.28279	1190.18	0.719232	1191.69	-0.0263447	1192.52	6.98506	1162.89	-0.386001	1056.7	2711.89	1059.79	247.142	1162.89	8.55127	1179.62	0.838945	1158.32	-8.30623	1152.98	106.868	1152.22	11.3308	1152.22	-64.0782
1152.91	0.459057	1191.69	2.42932	1190.94	-1.08636	1190.94	0.686608	1192.45	-0.864534	1193.28	7.4883	1163.65	6.27702	1057.47	2880.94	1060.56	268.803	1163.65	9.85654	1180.38	-4.00164	1159.08	-5.34946	1153.74	118.883	1152.98	0.226239	1152.98	-44.3316
1153.67	0.305611	1192.45	0.747459	1191.69	-0.0556847	1191.69	0.921308	1193.21	-2.0509	1194.04	8.27147	1164.41	5.5447	1058.25	3028.26	1061.33	297.718	1164.41	9.69557	1181.14	-5.18868	1159.84	-5.35319	1154.51	89.4888	1153.74	-51.0922	1153.74	-73.8481
1154.44	0.172987	1193.21	0.523092	1192.45	0.708399	1192.45	0.885679	1193.97	-2.377	1194.8	10.017	1165.17	0.111832	1059.02	3173.03	1062.11	326.055	1165.17	8.96781	1181.9	0.900132	1160.6	3.64413	1155.27	94.0482	1154.51	-99.1773	1154.51	-107.562
1155.2	0.337966	1193.97	1.31624	1193.21	0.759801	1193.21	1.09119	1194.73	-1.91718	1195.56	5.67874	1165.93	2.37372	1059.79	3300.9	1062.88	351.146	1165.93	7.62529	1182.66	-2.83093	1161.36	10.4299	1156.03	99.877	1155.27	-122.141	1155.27	-160.175
1155.96	0.445923	1194.73	1.88816	1193.97	-0.849141	1193.97	1.21814	1195.49	-2.59645	1196.31	-1.82449	1166.69	-7.86792	1060.56	3433.3	1063.65	376.364	1166.69	6.96559	1183.42	-2.63241	1162.13	16.0446	1156.79	93.0827	1156.03	-120.736	1156.03	-172.529
1156.72	0.638452	1195.49	2.9394	1194.73	-1.44556	1194.73	0.0391704	1196.24	-2.11669	1197.07	-9.18713	1167.45	-18.6723	1061.33	3559.73	1064.42	394.108	1167.45	8.0521	1184.18	2.04229	1162.89	17.5464	1157.56	43.162	1156.79	-126.288	1156.79	-147.996
1157.49	0.782288	1196.24	2.99417	1195.49	-1.2579	1195.49	-0.222895	1197	-6.7995	1197.83	-11.0682	1168.21	2.18614	1062.11	3686.56	1065.19	409.448	1168.21	9.69686	1184.94	5.23355	1163.65	15.8466	1158.32	-29.019	1157.56	-85.4899	1157.56	-125.996
1158.25	0.649664	1197	1.81661	1196.24	-0.296373	1196.24	0.205188	1197.76	0.168606	1198.59	-6.26161	1168.98	10.0757	1062.88	3796.51	1065.96	427.981	1168.98	11.152	1185.69	2.63649	1164.41	17.0271	1159.08	-101.468	1158.32	-60.1795	1158.32	-94.794
1159.01	0.606417	1197.76	0.364254	1197	-0.2413	1197	-0.906069	1198.52	0.636118	1199.35	-3.28756	1169.74	12.0598	1063.65	3882.36	1066.74	460.85	1169.74	11.5077	1186.45	2.53995	1165.17	14.061	1159.84	-75.8286	1159.08	-53.5902	1159.08	-25.5568
1159.77	0.643257	1198.52	0.537306	1197.76	-0.435483	1197.76	-0.0756578	1199.28	0.889739	1200.1	-0.640095	1170.5	13.3441	1064.42	3961.2	1067.51	496.504	1170.5	10.568	1187.21	-0.694815	1165.93	12.3575	1160.6	-86.7711	1159.84	-43.2304	1159.84	31.7393
1160.53	0.690028	1199.28	0.6258	1198.52	-0.481173	1198.52	0.254339	1200.03	0.54441	1200.86	1.12965	1171.26	6.72435	1065.19	3997.47	1068.28	544.03	1171.26	9.12278	1187.97	-5.24442	1166.69	11.7225	1161.36	-76.8656	1160.6	-49.6971	1160.6	44.3213
1161.29	0.569898	1200.03	-0.210715	1199.28	-0.413658	1199.28	-0.389772	1200.79	-0.141692	1201.62	2.02479	1172.02	-8.71208	1065.96	3992.27	1069.05	600.42	1172.02	6.25452	1188.73	-9.22023	1167.45	14.6643	1162.13	4.54149	1161.36	-50.0364	1161.36	1.28198
1162.06	0.351421	1200.79	-0.787128	1200.03	0.0942357	1200.03	-0.273227	1201.55	-0.895862	1202.38	-1.67208	1172.78	-15.3859	1066.74	3985.76	1069.82	640.679	1172.78	4.91885	1189.49	-11.1388	1168.21	15.9083	1162.89	47.2923	1162.13	-69.361	1162.13	38.3766
1162.82	0.037801	1201.55	-0.844946	1200.79	0.129115	1200.79	-1.12446	1202.31	-1.58823	1203.13	-2.03101	1173.54	-24.7041	1067.51	3951.95	1070.59	714.521	1173.54	3.38968	1190.25	-10.8546	1168.98	0.220404	1163.65	76.3829	1162.89	-53.5714	1162.89	29.2684
1163.58	-0.0506148	1202.31	-1.29247	1201.55	-0.0830171	1201.55	-3.21937	1203.06	-1.85282	1203.89	-0.260019	1174.3	-34.5092	1068.28	3876.91	1071.36	777.749	1174.3	2.5596	1191.01	-4.99152	1169.74	3.28364	1164.41	118.043	1163.65	-28.4024	1163.65	-34.1688
1164.34	-0.00961041	1203.06	-1.484	1202.31	-0.918696	1202.31	-5.49877	1203.82	0.569331	1204.65	0.100151	1175.06	-28.7264	1069.05	3762.93	1072.13	848.733	1175.06	2.14606	1191.77	2.42709	1170.5	3.65721	1165.17	90.6152	1164.41	15.5256	1164.41	14.3085
1165.1	0.25884	1203.82	-0.206298	1203.06	-2.34406	1203.06	-4.70366	1204.58	0.605643	1205.4	3.52208	1175.82	-9.84482	1069.82	3603.12	1072.9	938.174	1175.82	0.983342	1192.52	8.11071	1171.26	3.94672	1165.93	85.1619	1165.17	41.0906	1165.17	60.5838
1165.86	0.287351	1204.58	-0.679603	1203.82	-1.98486	1203.82	-3.32197	1205.33	-0.675564	1206.16	5.80751	1176.58	-11.5908	1070.59	3420.93	1073.67	1051.2	1176.58	1.23078	1193.28	10.9607	1172.02	8.19042	1166.69	64.01	1165.93	41.0152	1165.93	-4.66268
1166.62	0.153446	1205.33	-0.497235	1204.58	-1.35275	1204.58	-2.40613	1206.09	-1.92744	1206.92	4.1572	1177.34	-13.6074	1071.36	3235.46	1074.44	1185.26	1177.34	2.68846	1194.04	12.9608	1172.78	9.28871	1167.45	21.2234	1166.69	27.7614	1166.69	-48.1362
1167.38	0.083931	1206.09	-0.800057	1205.33	-0.613756	1205.33	-1.9597	1206.85	-2.40435	1207.68	7.81301	1178.1	-17.3304	1072.13	3045.31	1075.21	1374.12	1178.1	3.90725	1194.8	14.1805	1173.54	2.39829	1168.21	22.9935	1167.45	16.1195	1167.45	-47.764
1168.14	-0.428304	1206.85	-1.22879	1206.09	-0.264757	1206.09	-0.690579	1207.61	-2.26493	1208.43	9.06148	1178.86	-26.4934	1072.9	2851.27	1075.98	1625.87	1178.86	3.93722	1195.56	13.211	1174.3	3.08752	1168.98	4.36269	1168.21	8.35197	1168.21	-85.0344
1168.91	-0.529534	1207.61	-0.117965	1206.85	-0.805083	1206.85	0.186945	1208.36	-1.72536	1209.19	10.7056	1179.62	-37.5539	1073.67	2658.55	1076.76	1918.27	1179.62	3.93251	1196.31	11.5848	1175.06	3.66094	1169.74	30.0382	1168.98	-14.1211	1168.98	-117.136
1169.67	-0.620192	1208.36	0.642422	1207.61	-1.28014	1207.61	0.0761944	1209.12	-1.37434	1209.95	10.8605	1180.38	-24.9169	1074.44	2466.11	1077.53	2294.94	1180.38	4.37773	1197.07	6.27781	1175.82	1.70346	1170.5	-7.04467	1169.74	-16.2609	1169.74	-117.032
1170.43	-0.35975	1209.12	-0.0488241	1208.36	-1.6583	1208.36	0.588629	1209.87	-2.44436	1210.7	8.50412	1181.14	-18.7445	1075.21	2283.8	1078.3	2763.72	1181.14	3.52582	1197.83	3.22661	1176.58	2.5776	1171.26	-32.6129	1170.5	-20.5311	1170.5	-116.619
1171.19	-0.102511	1209.87	0.362647	1209.12	-2.26798	1209.12	0.631877	1210.63	-5.34313	1211.46	5.38886	1181.9	-29.9205	1075.98	2097.34	1079.07	3246.34	1181.9	1.29114	1198.59	1.18159	1177.34	2.16855	1172.02	-46.3447	1171.26	-29.6844	1171.26	-125.934
1171.95	0.119169	1210.63	-0.395009	1209.87	-2.74874	1209.87	0.440103	1211.39	-6.2783	1212.22	2.53301	1182.66	-33.1059	1076.76	1922.49	1079.84	3688.24	1182.66	-0.128001	1199.35	2.52091	1178.1	8.17922	1172.78	-43.0905	1172.02	-25.4707	1172.02	-108.627
1172.71	0.318105	1211.39	-1.3796	1210.63	-3.15424	1210.63	0.145199	1212.14	-5.14904	1212.97	-0.155514	1183.42	-34.3036	1077.53	1768.05	1080.61	3977.06	1183.42	0.107881	1200.1	4.57001	1178.86	4.00089	1173.54	-14.0715	1172.78	-41.7033	1172.78	-132.033
1173.47	0.469309	1212.14	-1.36948	1211.39	-2.62901	1211.39	-0.234378	1212.9	-5.10461	1213.73	-2.09819	1184.18	-30.173	1078.3	1623.37	1081.37	3999.71	1184.18	1.61222	1200.86	1.1612	1179.62	5.03006	1174.3	47.3817	1173.54	-28.8643	1173.54	-174.06
1174.23	0.594244	1212.9	1.05606	1212.14	-1.31298	1212.14	-0.607194	1213.66	-3.24723	1214.49	4.21069	1184.94	-28.6795	1079.07	1488.04	1082.14	3655.92	1184.94	3.65468	1201.62	3.20621	1180.38	1.0684	1175.06	92.5641	1174.3	-27.865	1174.3	-173.791
1174.99	0.527932	1213.66	2.08073	1212.9	-0.288214	1212.9	-0.496873	1214.41	-2.46273	1215.24	10.4698	1185.69	-27.6297	1079.84	1359.26	1082.91	3072.07	1185.69	5.62093	1202.38	2.85676	1181.14	1.93507	1175.82	123.21	1175.06	-22.8878	1175.06	-125.396
1175.75	0.354624	1214.41	1.68548	1213.66	0.316159	1213.66	-0.564482	1215.17	-1.08853	1216	12.2545	1186.45	-26.6485	1080.61	1256.89	1083.68	2388.63	1186.45	6.41677	1203.13	2.12932	1181.9	0.0597705	1176.58	75.9537	1175.82	-35.0387	1175.82	-78.9037
1176.51	0.389222	1215.17	-0.832579	1214.41	0.204381	1214.41	-0.200896	1215.93	0.257609	1216.75	12.3901	1187.21	-23.5208	1081.37	1150.19	1084.45	1834.03	1187.21	6.02035	1203.89	-2.23945	1182.66	-3.01654	1177.34	17.3971	1176.58	-76.6006	1176.58	-66.27
1177.27	0.10155	1215.93	-2.89267	1215.17	-0.0893403	1215.17	-0.0471117	1216.68	0.364411	1217.51	10.3796	1187.97	-23.0085	1082.14	1044.86	1085.22	1343.9	1187.97	5.65561	1204.65	-4.1213	1183.42	-5.83883	1178.1	-20.3652	1177.34	-49.9893	1177.34	-34.0758
1178.03	0.0874548	1216.68	-3.056	1215.93	-0.158079	1215.93	0.483459	1217.44	0.149239	1218.26	9.20766	1188.73	-16.9155	1082.91	935.907	1085.99	962.218	1188.73	4.40856	1205.4	-3.28915	1184.18	-3.42933	1178.86	1.98467	1178.1	-41.0434	1178.1	-94.6906
1178.79	-0.0896972	1217.44	-2.959	1216.68	-0.432627	1216.68	0.543556	1218.19	-2.12011	1219.02	8.96008	1189.49	-18.4667	1083.68	833.633	1086.76	774.042	1189.49	4.03526	1206.16	8.00465	1184.94	1.8697	1179.62	-51.0292	1178.86	-35.642	1178.86	-98.6709
1179.55	-0.177472	1218.19	-3.31498	1217.44	-0.847305	1217.44	0.792314	1218.95	-1.67851	1219.78	8.96257	1190.25	-9.04036	1084.45	756.423	1087.53	604.939	1190.25	2.08612	1206.92	9.00404	1185.69	5.23552	1180.38	-110.998	1179.62	-33.3325	1179.62	-67.8414
1180.31	-0.420936	1218.95	-2.85099	1218.19	-1.79354	1218.19	1.1764	1219.71	-3.34991	1220.53	6.47622	1191.01	4.69334	1085.22	696.804	1088.3	489.719	1191.01	2.00907	1207.68	10.5772	1186.45	13.269	1181.14	-72.342	1180.38	-48.6601	1180.38	-76.2777
1181.07	-0.465785	1219.71	-0.749627	1218.95	-1.73194	1218.95	0.525205	1220.46	-4.81368	1221.29	4.25424	1191.77	5.87298	1085.99	642.42	1089.07	411.157	1191.77	2.76123	1208.43	8.27115	1187.21	17.5464	1181.9	-42.3932	1181.14	-75.0641	1181.14	-62.5171
1181.83	-0.273576	1220.46	0.0423196	1219.71	-1.14817	1219.71	-0.19714	1221.22	-4.44556	1222.04	2.59459	1192.52	6.17241	1086.76	587.096	1089.84	358.363	1192.52	4.15084	1209.19	7.45668	1187.97	14.1862	1182.66	-61.0956	1181.9	-73.1787	1181.9	-48.6325
1182.59	-0.124935	1221.22	-0.484949	1220.46	-0.873006	1220.46	-0.64454	1221.97	-2.34781	1222.8	0.74149	1193.28	-1.35641	1087.53	540.941	1090.61	315.715	1193.28	5.40003	1209.95	3.39249	1188.73	6.89228	1183.42	-5.79308	1182.66	-81.6721	1182.66	-71.5737
1183.35	-0.0531776	1221.97	-0.767936	1221.22	-0.525231	1221.22	-0.954898	1222.73	-0.727114	1223.55	4.11116	1194.04	-8.30082	1088.3	503.875	1091.37	273.509	1194.04	5.89577	1210.7	-2.43933	1189.49	4.22129	1184.18	35.9743	1183.42	-76.1953	1183.42	-102.403
1184.11	0.00512555	1222.73	-0.979935	1221.97	0.340227	1221.97	0.292651	1223.48	0.754171	1224.31	3.6552	1194.8	-10.8874	1089.07	465.769	1092.14	234.197	1194.8	6.50324	1211.46	-7.48116	1190.25	-1.12817	1184.94	1.78799	1184.18	-67.2494	1184.18	-116.619
1184.87	-0.0140953	1223.48	-1.16608	1222.73	0.152776	1222.73	0.702813	1224.24	1.10434	1225.06	1.25593	1195.56	-5.86938	1089.84	431.892	1092.91	195.038	1195.56	6.84187	1212.22	-10.293	1191.01	0.00560348	1185.69	46.8274	1184.94	-46.2941	1184.94	-118.2
1185.62	0.113403	1224.24	-1.86993	1223.48	0.09138	1223.48	1.03056	1224.99	0.739645	1225.82	0.554873	1196.31	5.47255	1090.61	402.753	1093.68	164.226	1196.31	6.49853	1212.97	-9.25967	1191.77	-0.0280174	1186.45	64.7788	1185.69	-31.9279	1185.69	-99.1672
1186.38	0.0166581	1224.99	-2.0963	1224.24	-0.828948	1224.24	1.50607	1225.75	0.148954	1226.57	3.70123	1197.07	11.4321	1091.37	370.531	1094.45	141.617	1197.07	5.64876	1213.73	-7.69327	1192.52	0.496842	1187.21	-29.3945	1186.45	-23.2837	1186.45	-94.8457
1187.14	-0.119489	1225.75	-2.99811	1224.99	-1.32032	1224.99	1.13015	1226.5	-1.47616	1227.33	6.88055	1197.83	15.2272	1092.14	339.012	1095.22	126.265	1197.83	4.97536	1214.49	-3.83032	1193.28	-1.87903	1187.97	-84.1427	1187.21	-54.8628	1187.21	-145.163
1187.9	0.0746409	1226.5	-3.05914	1225.75	-1.80965	1225.75	0.406835	1227.26	-1.84128	1228.08	9.0845	1198.59	14.3686	1092.91	316.625	1095.98	116.896	1198.59	2.87254	1215.24	-1.78803	1194.04	-1.71653	1188.73	-89.167	1187.97	-46.0395	1187.97	-198.934
1188.66	0.0506148	1227.26	-2.41069	1226.5	-1.94264	1226.5	-0.348884	1228.01	-1.66798	1228.84	10.6502	1199.35	9.32535	1093.68	301.673	1096.75	102.803	1199.35	1.41272	1216	-0.500376	1194.8	1.43076	1189.49	-52.2986	1188.73	-47.2933	1188.73	-234.126
1189.42	-0.115966	1228.01	-1.52656	1227.26	-2.67144	1227.26	-0.263139	1228.77	-0.795895	1229.59	8.20802	1200.1	-1.81817	1094.45	301.278	1097.52	76.5236	1200.1	1.65075	1216.75	0.116936	1195.56	3.0595	1190.25	-40.9628	1189.49	-28.1007	1189.49	-177.047
1190.18	-0.225524	1228.77	-0.62066	1228.01	-2.4848	1228.01	-1.05642	1229.52	-0.535866	1230.35	4.90366	1200.86	-0.0144299	1095.22	301.378	1098.29	76.6848	1200.86	2.82887	1217.51	-4.87866	1196.31	5.61843	1191.01	4.20177	1190.25	-18.363	1190.25	-137.161
1190.94	-0.438876	1229.52	0.00176666	1228.77	-2.52621	1228.77	-0.857241	1230.28	-0.908821	1231.1	0.792498	1201.62	0.198412	1095.98	294.449	1099.06	58.0295	1201.62	3.47873	1218.26	-2.84861	1197.07	1.04038	1191.77	110.998	1191.01	11.4722	1191.01	-150.053
1191.69	-0.537222	1230.28	0.571435	1229.52	-2.06258	1229.52	-0.669974	1231.03	0.208479	1231.86	-3.90215	1202.38	-6.23373	1096.75	274.324	1099.83	58.2598	1202.38	4.84137	1219.02	3.39385	1197.83	-7.60393	1192.52	158.595	1191.77	25.2539	1191.77	-154.385
1192.45	-0.806634	1231.03	0.454674	1230.28	-2.08236	1230.28	-0.505673	1231.79	0.089572	1232.61	-5.61654	1203.13	-9.98552	1097.52	236.288	1100.59	65.2198	1203.13	5.65989	1219.78	6.23294	1198.59	-11.0501	1193.28	149.279	1192.52	16.7511	1192.52	-114.334
1193.21	-1.0533	1231.79	1.17628	1231.03	-1.3401	1231.03	-1.63754	1232.54	1.10904	1233.36	-3.77836	1203.89	-8.90688	1098.29	205.79	1101.36	70.9936	1203.89	6.10468	1220.53	1.4209	1199.35	-8.38468	1194.04	156.574	1193.28	-9.9922	1193.28	-44.7141
1193.97	-1.07701	1232.54	0.891923	1231.79	-0.812834	1231.79	-0.201969	1233.29	2.27305	1234.12	-1.93584	1204.65	-9.03675	1099.06	175.343	1102.13	68.5731	1204.65	6.16248	1221.29	-0.845743	1200.1	0.141955	1194.8	101.54	1194.04	-17.722	1194.04	-17.5238
1194.73	-1.01614	1233.29	-0.261867	1232.54	-0.626198	1232.54	0.466932	1234.05	0.883189	1234.87	0.303563	1205.4	-3.23952	1099.83	172.761	1102.9	66.3696	1205.4	4.73691	1222.04	-0.290979	1200.86	3.4835	1195.56	53.5324	1194.8	-31.2398	1194.8	-0.341172
1195.49	-0.72911	1234.05	-0.563244	1233.29	-1.18672	1233.29	0.914547	1234.8	1.07757	1235.63	-0.548653	1206.16	-10.0072	1100.59	167.843	1103.66	66.2909	1206.16	6.20828	1222.8	-0.318174	1201.62	5.83883	1196.31	5.43548	1195.56	-0.0282798	1195.56	-61.0387
1196.24	-0.511274	1234.8	-0.264357	1234.05	-0.725125	1234.05	1.12854	1235.56	0.679266	1236.38	0.559228	1206.92	-16.3167	1101.36	154.153	1104.43	68.8745	1206.92	6.50838	1223.55	-0.028554	1202.38	5.44285	1197.07	-50.6358	1196.31	-9.17209	1196.31	-72.7419
1197	-0.826496	1235.56	0.255202	1234.8	-1.03027	1234.8	1.70429	1236.31	0.0971194	1237.14	2.65929	1207.68	-13.6796	1102.13	139.407	1105.2	64.5499	1207.68	7.17964	1224.31	1.52424	1203.13	3.07631	1197.83	-127.43	1197.07	-37.829	1197.07	-93.7912
1197.76	-0.708928	1236.31	0.530079	1235.56	-0.549504	1235.56	2.16982	1237.06	-0.0126739	1237.89	4.52918	1208.43	-7.76331	1102.9	125.762	1105.97	62.4289	1208.43	8.00929	1225.06	-2.96418	1203.89	-6.29271	1198.59	-144.38	1197.83	-67.5134	1197.83	-56.9136
1198.52	-0.732314	1237.06	1.07236	1236.31	0.0250887	1236.31	3.60453	1237.82	-0.67058	1238.64	4.50866	1209.19	-13.8419	1103.66	120.384	1106.73	54.5322	1209.19	8.78586	1225.82	-9.08426	1204.65	-8.25953	1199.35	-58.5566	1198.59	-99.9126	1198.59	-37.4668
1199.28	-0.889604	1237.82	0.419743	1237.06	0.124424	1237.06	3.84202	1238.57	-0.491151	1239.4	3.13702	1209.95	-26.6557	1104.43	115.061	1107.5	37.6792	1209.95	8.94983	1226.57	-7.11811	1205.4	-16.0409	1200.1	-37.2438	1199.35	-67.3531	1199.35	-40.341
1200.03	-0.985067	1238.57	-0.437168	1237.82	-0.101171	1237.82	3.04584	1239.33	-0.153511	1240.15	1.79339	1210.7	-15.2597	1105.2	118.803	1108.27	26.4388	1210.7	6.87954	1227.33	-3.68755	1206.16	-13.9956	1200.86	-25.1928	1200.1	-34.8219	1200.1	-52.0855
1200.79	-0.65543	1239.33	-0.494424	1238.57	0.0787337	1238.57	0.905855	1240.08	-1.12627	1240.9	0.403092	1211.46	-10.7972	1105.97	113.451	1109.03	28.2719	1211.46	7.58205	1228.08	0.534368	1206.92	-8.72462	1201.62	-64.7788	1200.86	-30.1651	1200.86	-98.2057
1201.55	-0.394347	1240.08	-0.732121	1239.33	-0.64476	1239.33	0.38623	1240.83	-1.04994	1241.66	2.12743	1212.22	-14.8881	1106.73	105.586	1109.8	24.2276	1212.22	7.10215	1228.84	0.639067	1207.68	1.78938	1202.38	-30.7713	1201.62	-11.6984	1201.62	-100.687
1202.31	-0.300806	1240.83	1.24068	1240.08	-1.09962	1240.08	-0.00729749	1241.59	-0.978314	1242.41	0.0833554	1212.97	-22.8895	1107.5	98.045	1110.57	27.7805	1212.97	6.57302	1229.59	-1.79618	1208.43	11.0501	1203.13	17.3614	1202.38	9.23807	1202.38	-126.192
1203.06	-0.418373	1241.59	1.90422	1240.83	-1.28687	1240.83	0.324094	1242.34	-0.137847	1243.16	-2.99582	1213.73	-3.54255	1108.27	91.2962	1111.33	28.6385	1213.73	6.93734	1230.35	-8.55261	1209.19	10.1404	1203.89	0.822475	1203.13	30.9758	1203.13	-136.127
1203.82	-0.42446	1242.34	2.02307	1241.59	-0.524823	1241.59	1.05556	1243.09	-0.419522	1243.92	-5.0853	1214.49	-0.238094	1109.03	74.7927	1112.1	16.9451	1214.49	6.87654	1231.1	-13.4394	1209.95	7.79818	1204.65	-27.7317	1203.89	-11.8492	1203.89	-139.518
1204.58	-0.519603	1243.09	2.22575	1242.34	-0.368784	1242.34	0.568131	1243.85	-0.237672	1244.67	-7.43107	1215.24	0.710674	1109.8	86.0762	1112.87	17.9816	1215.24	9.30772	1231.86	-13.0642	1210.7	3.44241	1205.4	-48.6869	1204.65	-65.6846	1204.65	-125.841
1205.33	-0.382495	1243.85	2.03792	1243.09	-0.0157059	1243.09	0.0253266	1244.6	-1.02901	1245.42	-4.29467	1216	0.634917	1110.57	92.9982	1113.64	25.4771	1216	7.89242	1232.61	-9.76412	1211.46	5.21124	1206.16	-48.0075	1205.4	-83.991	1205.4	-84.7759
1206.09	-0.278702	1244.6	2.11301	1243.85	-1.14041	1243.85	-0.914225	1245.35	-2.33101	1246.17	-0.604016	1216.75	4.84124	1111.33	96.9546	1114.4	22.3926	1216.75	6.50795	1233.36	-3.71746	1212.22	7.53668	1206.92	-102.666	1206.16	-82.0303	1206.16	-41.2197
1206.85	-0.0458096	1245.35	1.92614	1244.6	-1.38702	1244.6	-1.48815	1246.1	-2.71664	1246.93	-0.74149	1217.51	-11.4141	1112.1	87.023	1115.17	23.1181	1217.51	4.4107	1234.12	-0.878377	1212.97	10.2189	1207.68	-100.753	1206.92	-80.8803	1206.92	-29.7853
1207.61	-0.0973855	1246.1	2.992	1245.35	-0.945212	1245.35	-0.0567702	1246.86	-2.63732	1247.68	-8.01083	1218.26	-11.5115	1112.87	74.9437	1115.93	23.5692	1218.26	3.42693	1234.87	2.53587	1213.73	11.6795	1208.43	-73.9512	1207.68	-52.5533	1207.68	-61.018
1208.36	-0.297602	1246.86	2.73335	1246.1	-1.71664	1246.1	1.38566	1247.61	-0.9111	1248.43	0.946146	1219.02	-15.3066	1113.64	69.4437	1116.7	17.1198	1219.02	3.38583	1235.63	4.78348	1214.49	9.64733	1209.19	-58.9678	1208.43	-19.1643	1208.43	-21.5455
1209.12	-0.411326	1247.61	1.07855	1246.86	-1.96161	1246.86	1.29799	1248.36	-0.0992555	1249.19	4.21131	1219.78	-3.35135	1114.4	60.5657	1117.47	14.8893	1219.78	3.94921	1236.38	4.89226	1215.24	9.70523	1209.95	40.8913	1209.19	13.0558	1209.19	33.0833
1209.87	-0.631725	1248.36	1.71888	1247.61	-1.52001	1247.61	1.14098	1249.12	-0.248352	1249.94	6.26285	1220.53	-5.18035	1115.17	60.9488	1118.23	15.2982	1220.53	4.24203	1237.14	-1.28085	1216	8.1045	1210.7	12.498	1209.95	20.4086	1209.95	33.104
1210.63	-0.724946	1249.12	0.594562	1248.36	-1.86391	1248.36	0.787914	1249.87	-0.306026	1300.53	-0.237023	1221.29	-7.03459	1115.93	50.7851	1119	16.1946	1221.29	4.94026	1237.89	-5.99091	1216.75	7.10708	1211.46	0.0357598	1210.7	0.650436	1210.7	4.12507
1211.39	-0.6093	1249.87	0.108088	1249.12	-1.90878	1249.12	0.524561	1251.37	18.0375	1301.28	-36.2294	1222.04	-8.52449	1116.7	45.0752	1119.76	10.5417	1222.04	6.07343	1238.64	-5.52997	1217.51	9.72578	1212.22	7.31287	1211.46	-15.1391	1211.46	-3.90796
1212.14	-0.506789	1255.13	98.5752	1249.87	-1.77559	1249.87	-0.0680384	1252.12	19.132	1302.03	-5.67977	1222.8	-3.97545	1117.47	36.1087	1120.53	13.776	1222.8	6.98014	1239.4	-3.70523	1218.26	6.70363	1212.97	-9.88757	1212.22	-40.0065	1212.22	10.9588
1212.9	-0.266529	1255.89	52.3697	1251.37	47.1164	1251.37	-2.33174	1252.88	11.7824	1302.78	53.7866	1223.55	1.87589	1118.23	22.9353	1121.29	13.7914	1223.55	7.05421	1240.15	-0.561563	1219.02	1.81179	1213.73	-29.8594	1212.97	-81.1631	1212.97	31.3464
1213.66	-0.146719	1256.64	2.21796	1252.12	90.7555	1252.12	-43.1993	1253.63	-39.769	1303.53	0.746182	1224.31	0.104617	1119	18.0874	1122.06	6.39184	1224.31	6.63467	1240.9	-8.10663	1219.78	-3.75433	1214.49	-0.858234	1213.73	-71.5102	1213.73	76.0089
1214.41	0.00512555	1257.39	-29.0869	1252.88	122.409	1252.88	-20.3607	1254.38	-7.09243	1304.28	-5.28473	1225.06	4.30734	1119.76	20.5151	1122.83	0	1225.06	8.98108	1241.66	-14.1166	1220.53	-5.23926	1215.24	27.4635	1214.49	-36.5469	1214.49	93.481
1215.17	0.0659915	1258.14	-18.8786	1253.63	118.26	1253.63	7.22182	1255.13	-8.63569	1305.03	12.0882	1225.82	6.59448	1120.53	22.4233	1123.59	-5.39564	1225.82	10.8309	1242.41	-18.0706	1221.29	-3.53206	1216	46.6129	1215.24	-2.34722	1215.24	65.8358
1215.93	0.0756019	1258.89	-0.0892944	1254.38	107.196	1254.38	0.233905	1255.89	-76.1342	1305.78	57.1312	1226.57	-0.862189	1121.29	32.528	1124.36	-2.98286	1226.57	10.3287	1243.16	-18.5261	1222.04	0.926442	1216.75	-3.77265	1216	27.2146	1216	0.165416
1216.68	0.0813682	1259.64	21.3673	1255.13	86.4997	1255.13	4.26146	1256.64	22.7604	1306.53	21.4462	1227.33	-13.9537	1122.06	31.9571	1125.12	-21.2582	1227.33	10.1729	1243.92	-18.212	1222.8	6.30579	1217.51	-85.1261	1216.75	45.3891	1216.75	-50.4624
1217.44	0.23994	1260.4	52.1623	1255.89	88.3379	1255.89	3.44279	1257.39	55.7982	1307.28	10.3588	1228.08	-21.8253	1122.83	34.3736	1125.89	-22.5538	1228.08	8.48876	1244.67	-13.9629	1223.55	12.9889	1218.26	-151.353	1217.51	39.0073	1217.51	-71.8838
1218.19	0.491733	1261.15	44.5493	1256.64	63.3255	1256.64	-5.86225	1258.14	58.1076	1308.03	-28.0038	1228.84	-28.546	1123.59	33.2943	1126.65	0.554727	1228.84	7.87059	1245.42	-11.9682	1224.31	16.2688	1219.02	-207.085	1218.26	19.0889	1218.26	-73.1658
1218.95	0.674331	1261.9	0.417667	1257.39	47.2408	1257.39	-39.201	1258.89	50.4515	1308.78	-34.8599	1229.59	-33.3079	1124.36	33.9537	1127.42	3.26502	1229.59	7.16894	1246.17	-9.92729	1225.06	13.5959	1219.78	-136.137	1219.02	-4.48706	1219.02	-113
1219.71	0.662478	1262.65	-22.9832	1258.14	26.3385	1258.14	-30.2432	1259.64	21.2937	1309.53	-22.8507	1230.35	-28.8671	1125.12	31.7139	1128.18	6.35345	1230.35	6.24638	1246.93	-6.58239	1225.82	7.76456	1220.53	-123.371	1219.78	-60.6979	1219.78	-149.692
1220.46	0.471551	1263.4	-39.5776	1258.89	25.8337	1258.89	-37.0557	1260.4	1.17113	1310.28	-11.7633	1231.1	-18.3441	1125.89	41.3729	1128.95	2.58361	1231.1	5.14574	1247.68	-9.45411	1226.57	10.372	1221.29	-93.8694	1220.53	-69.4929	1220.53	-156.298
1221.22	0.197013	1264.15	-42.9333	1259.64	15.6794	1259.64	-3.07	1261.15	0.191539	1311.03	15.8454	1231.86	-1.2554	1126.65	39.4463	1129.71	8.62803	1231.86	4.02883	1248.43	-14.5014	1227.33	9.65854	1222.04	-114.163	1221.29	-52.4308	1221.29	-82.6255
1221.97	-0.0813682	1264.9	-25.7513	1260.4	8.18457	1260.4	-0.500703	1261.9	-84.7151	1311.78	26.4149	1232.61	10.6349	1127.42	53.7911	1130.48	13.9546	1232.61	2.95944	1249.19	-17.4887	1228.08	3.82718	1222.8	-155.323	1222.04	-19.2114	1222.04	-35.7403
1222.73	-0.173308	1265.65	-27.0562	1261.15	-0.248879	1261.15	0	1262.65	-139.452	1312.53	5.0916	1233.36	19.1666	1128.18	52.2808	1131.24	14.2271	1233.36	3.4479	1249.94	-14.5177	1228.84	2.93809	1223.55	-59.4685	1222.8	1.13119	1222.8	-33.1143
1223.48	-0.285429	1266.41	-29.0034	1261.9	-21.2898	1261.9	-0.767501	1263.4	-169.983	1313.28	-0.114122	1234.12	24.7185	1128.95	47.5655	1132.01	16.4134	1234.12	3.04164	1273.23	-48.535	1229.59	0.608912	1224.31	-13.1596	1223.55	11.9247	1223.55	-44.0732
1224.24	-0.487568	1267.16	0.481037	1262.65	0.13155	1262.65	-1.04161	1264.15	-154.868	1314.03	-9.96373	1234.87	23.243	1129.71	43.0749	1132.77	22.834	1234.87	2.3935	1273.98	3.0268	1230.35	-9.8696	1225.06	-1.00127	1224.31	9.06839	1224.31	-50.7415
1224.99	-0.0275499	1267.91	64.2747	1263.4	37.2465	1263.4	0	1264.9	-146.456	1314.79	-9.31411	1235.63	19.5526	1130.48	33.1506	1133.53	22.0605	1235.63	1.99579	1274.73	59.0491	1231.1	-7.37792	1225.82	-24.3166	1225.06	-8.86101	1225.06	-92.2507
1225.75	0.0249871	1268.66	73.2358	1264.15	62.9238	1264.15	-7.55075	1265.65	-140.672	1315.53	21.1214	1236.38	3.56059	1131.24	17.8774	1134.3	17.3578	1236.38	1.32925	1275.49	77.8471	1231.86	-6.07978	1226.57	-14.9655	1225.82	-38.2532	1225.82	-85.5307
1226.5	0.204061	1269.41	95.7495	1264.9	114.836	1264.9	-2.68625	1266.41	-91.0633	1316.28	21.9465	1237.14	-7.04181	1132.01	14.3446	1135.06	8.36314	1237.14	2.92819	1276.24	52.9424	1232.61	-5.72863	1227.33	-8.51082	1226.57	-24.3866	1226.57	-90.8137
1227.26	0.445603	1270.16	78.8873	1265.65	126.175	1265.65	-22.8788	1267.16	-70.2402	1317.03	6.42595	1237.89	-10.4401	1132.77	14.5399	1135.83	10.1559	1237.89	4.1243	1277	-131.161	1233.36	-4.6733	1228.08	28.3575	1227.33	-13.3104	1227.33	-68.7719
1228.01	0.386979	1270.91	80.8546	1266.41	117.496	1266.41	-9.53894	1267.91	-61.807	1317.78	2.67748	1238.64	-11.0786	1133.53	17.2365	1136.59	14.8548	1238.64	4.1243	1277.75	-270.766	1234.12	-11.1584	1228.84	58.8427	1228.08	-1.94188	1228.08	-75.647
1228.77	0.333481	1271.66	33.7389	1267.16	105.134	1267.16	0	1268.66	-73.086	1318.53	-9.72671	1239.4	-2.11759	1134.3	14.1199	1137.36	14.1791	1239.4	5.12134	1278.5	43.1717	1234.87	-3.58996	1229.59	111.91	1228.84	-11.048	1228.84	-86.9781
1229.52	0.465785	1272.41	41.6256	1267.91	69.9813	1267.91	-22.2283	1269.41	-43.277	1319.28	3.76603	1240.15	-7.91482	1135.06	11.6665	1138.12	14.8855	1240.15	3.46289	1279.25	-93.6183	1235.63	0.138219	1230.35	121.762	1229.59	17.1376	1229.59	-48.6325
1230.28	0.231291	1273.16	54.6654	1268.66	20.369	1268.66	-17.1884	1270.16	-16.5271	1320.03	8.82251	1240.9	-10.8549	1135.83	8.22948	1138.88	16.7704	1240.9	2.04588	1280.01	-170.403	1236.38	3.52085	1231.1	130.952	1230.35	60.9996	1230.35	-28.0795
1231.03	0.200217	1273.91	11.712	1269.41	-0.08533	1269.41	-11.6843	1270.91	-22.2295	1320.78	-17.2851	1241.66	-12.4134	1136.59	6.7891	1139.65	21.5691	1241.66	1.72823	1280.76	-44.1806	1237.14	6.34688	1231.86	114.807	1231.1	59.7458	1231.1	-39.6069
1231.79	0.247628	1274.66	0.259242	1270.16	-50.4478	1270.16	5.29576	1271.66	4.96908	1321.53	-2.65114	1242.41	-9.43718	1137.36	3.54732	1140.41	23.4483	1242.41	0.41654	1281.51	-288.926	1237.89	7.1874	1232.61	61.0598	1231.86	56.6822	1231.86	-17.7099
1232.54	0.150883	1275.41	5.85598	1270.91	-38.882	1270.91	29.2966	1272.41	21.2609	1322.28	-5.55686	1243.16	-0.523085	1138.12	-1.45532	1141.17	25.6518	1243.16	3.07375	1282.27	-1.48685	1238.64	3.14916	1233.36	-4.48785	1232.61	59.2274	1232.61	-33.4141
1233.29	0.441438	1276.16	73.1551	1271.66	-18.1148	1271.66	26.4276	1273.16	13.3421	1323.03	18.9794	1243.92	-2.87516	1138.88	7.97898	1141.94	23.5903	1243.92	1.95341	1283.02	157.34	1239.4	-5.09917	1234.12	-26.7662	1233.36	57.1535	1233.36	-0.35151
1234.05	0.578867	1276.91	68.8488	1272.41	30.6441	1272.41	1.21704	1273.91	-32.6766	1323.78	16.0298	1244.67	4.12696	1139.65	17.5864	1142.7	22.5461	1244.67	1.76377	1283.77	-613.75	1240.15	-14.1114	1234.87	-2.18135	1234.12	58.4355	1234.12	59.5396
1234.8	0.667603	1277.66	119.021	1273.16	54.8174	1273.16	-31.4164	1274.66	-3.99496	1324.52	89.9545	1245.42	8.03747	1140.41	31.0177	1143.47	19.8723	1245.42	1.9029	1284.52	-470.747	1240.9	-15.4918	1235.63	24.9424	1234.87	68.8708	1234.87	54.0085
1235.56	0.843794	1278.41	117.635	1273.91	36.9159	1273.91	-24.0118	1275.41	27.7185	1325.27	44.8938	1246.17	1.43217	1141.17	32.3549	1144.23	10.63	1246.17	3.48344	1285.28	-346.914	1241.66	-12.9179	1236.38	-20.3294	1235.63	75.6014	1235.63	-0.723697
1236.31	0.924522	1279.16	55.6909	1274.66	8.565	1274.66	0.047512	1276.16	23.4389	1326.02	2.38778	1246.93	-0.220057	1141.94	27.7317	1144.99	0.913669	1246.93	6.1903	1286.03	-487.102	1242.41	-10.062	1237.14	-19.1136	1236.38	100.045	1236.38	-40.8372
1237.06	0.989552	1279.91	8.46568	1275.41	-13.5106	1275.41	-13.8735	1276.91	-78.5257	1326.77	52.3557	1247.68	-2.90402	1142.7	15.144	1145.76	-6.9696	1247.68	6.97929	1286.78	-512.75	1243.16	-8.10637	1237.89	-13.392	1237.14	61.9611	1237.14	-5.33468
1237.82	1.00429	1280.66	-21.9405	1276.16	-14.7088	1276.16	-10.5659	1277.66	-75.0506	1327.52	-0.263359	1248.43	0.0252524	1143.47	7.87583	1146.52	-18.9375	1248.43	6.17404	1287.53	-415.096	1243.92	-7.40033	1238.64	-22.2247	1237.89	83.2935	1237.89	15.8283
1238.57	1.00653	1281.41	-23.4758	1276.91	1.65682	1276.91	12.4116	1278.41	-91.326	1328.27	6.65419	1249.19	1.0606	1144.23	5.98602	1147.28	-14.6993	1249.19	2.02191	1288.28	-484.394	1244.67	-1.40647	1239.4	-50.3676	1238.64	47.9531	1238.64	34.3032
1239.33	0.786773	1282.16	-44.918	1277.66	-0.327098	1277.66	-0.0511667	1279.16	-19.4878	1329.02	-1.95763	1249.94	2.40258	1144.99	8.65312	1148.05	-11.8585	1249.94	3.78996	1289.04	-496.873	1245.42	6.61211	1240.15	-77.9026	1239.4	50.734	1239.4	28.8755
1240.08	0.76627	1282.91	-88.4619	1278.41	8.48322	1278.41	-2.05763	1279.91	-9.45657	1329.76	11.9653	1300.53	10.2056	1145.76	15.4572	1148.81	3.19784	1250.69	2.65935	1289.79	-374.155	1246.17	5.07676	1240.9	-74.9525	1240.15	44.7858	1240.15	3.04987
1240.83	0.951751	1283.65	-30.5156	1279.16	8.93832	1279.16	2.97133	1280.66	-9.15558	1330.51	-16.6882	1301.28	45.1118	1146.52	14.7351	1149.57	-0.261048	1251.44	2.36439	1290.54	-180.227	1246.93	-1.44383	1241.66	-60.9704	1240.9	38.913	1240.9	5.61382
1241.59	1.44829	1284.4	-8.60395	1279.91	31.2023	1279.91	17.8024	1281.41	0.72785	1331.26	-38.8717	1302.03	0	1147.28	7.0617	1150.33	-9.27105	1252.2	2.46157	1291.29	-38.1801	1247.68	-4.32962	1242.41	-27.6602	1241.66	12.0472	1241.66	-24.9882
1242.34	1.67542	1285.15	-20.0135	1280.66	55.8983	1280.66	3.28929	1282.16	-16.8336	1332.01	-25.8267	1302.78	-88.9911	1148.05	15.9545	1151.1	-7.3535	1252.95	1.16657	1292.05	25.0109	1248.43	-4.05319	1243.16	52.1914	1242.41	9.79424	1242.41	-57.2755
1243.09	1.37781	1285.9	-48.7778	1281.41	91.1538	1281.41	12.068	1282.91	-26.3339	1332.76	-13.0187	1303.53	-15.4317	1148.81	18.5589	1151.86	-4.26123	1253.7	1.1503	1292.8	89.1578	1249.19	-1.10575	1243.92	94.2627	1243.16	14.8281	1243.16	-52.1372
1243.85	0.604495	1286.65	-87.3414	1282.16	109.631	1282.16	-2.07225	1283.65	-42.0894	1333.51	-0.228244	1304.28	-7.6419	1149.57	20.714	1152.62	0.032631	1254.45	1.57497	1293.55	10.0893	1249.94	0.102731	1244.67	107.369	1243.92	10.5766	1243.92	-35.7196
1244.6	0.43375	1287.4	-97.4115	1282.91	105.838	1282.91	0.910037	1284.4	-49.3788	1334.25	-13.3962	1305.03	28.2997	1150.33	27.1939	1153.38	1.14209	1255.21	2.75867	1294.3	-218.301	1250.69	3.7618	1245.42	109.246	1244.67	-2.86569	1244.67	-20.2325
1245.35	0.47091	1288.15	-90.2939	1283.65	65.7041	1283.65	4.32359	1285.15	-60.9807	1335	-17.5572	1305.78	16.3191	1151.1	32.0786	1154.15	4.06544	1255.96	4.27542	1295.05	-162.969	1251.44	1.39714	1246.17	79.8873	1245.42	-12.3489	1245.42	4.53861
1246.1	0.557724	1288.9	-71.2166	1284.4	18.4846	1284.4	-5.74529	1285.9	-97.8383	1335.75	-25.0542	1306.53	-80.1167	1151.86	33.018	1154.91	0.0537452	1256.71	4.8846	1295.8	-177.094	1252.2	-0.726585	1246.93	94.0661	1246.17	-16.374	1246.17	-5.64484
1246.86	0.967448	1289.64	-47.5853	1285.15	-2.75189	1285.15	2.06129	1286.65	-124.112	1336.5	-60.1335	1307.28	-1.03535	1152.62	37.0444	1155.67	-7.59343	1257.46	5.62264	1296.55	-290.891	1252.95	-3.89442	1247.68	66.7635	1246.93	-17.2978	1246.93	-22.8585
1247.61	1.19746	1290.39	-40.9429	1285.9	4.7287	1285.9	15.2075	1287.4	-155.174	1337.24	-44.9202	1308.03	10.3042	1153.38	40.4225	1156.43	-15.9604	1258.21	5.56143	1297.3	-375.96	1253.7	-8.15867	1248.43	55.8031	1247.68	2.00787	1247.68	-62.941
1248.36	1.42298	1291.14	-28.8306	1286.65	23.7111	1286.65	9.52798	1288.15	-153.56	1337.99	-23.8252	1308.78	42.3016	1154.15	42.7617	1157.19	-18.6054	1258.96	3.50655	1298.06	-288.98	1254.45	-14.4103	1249.19	39.9794	1248.43	11.0951	1248.43	-68.1723
1249.12	1.55464	1291.89	25.2444	1287.4	29.7375	1287.4	-3.30025	1288.9	-119.362	1338.74	-8.56793	1309.53	12.8187	1154.91	42.9017	1157.96	-29.222	1259.72	1.59595	1298.81	-148.844	1255.21	-18.2786	1249.94	63.4199	1249.19	28.261	1249.19	-42.8532
1249.87	1.46783	1292.64	63.2377	1288.15	18.0189	1288.15	0	1289.64	-45.1869	1339.49	-25.4668	1310.28	76.8627	1155.67	38.2601	1158.72	-34.6849	1260.47	1.02101	1299.56	-148.685	1255.96	-9.83598	1250.69	79.637	1249.94	31.0889	1249.94	-56.7792
1250.62	7.209	1293.39	27.4335	1288.9	6.83707	1288.9	2.20017	1290.39	3.34373	1340.24	-13.6946	1311.03	0	1156.43	19.5352	1159.48	-32.7155	1261.22	0.888732	1300.31	-82.7856	1256.71	-9.93311	1251.44	48.0075	1250.69	1.56482	1250.69	32.525
1251.37	-2.91806	1294.14	-8.25541	1289.64	-5.90199	1289.64	3.25274	1291.14	34.6084	1340.98	19.8836	1311.78	-35.9416	1157.19	5.70237	1160.24	-33.3969	1261.97	2.75867	1301.06	54.4824	1257.46	-10.2562	1252.2	-11.8365	1251.44	-15.7424	1251.44	66.0632
1252.12	-2.51597	1294.88	-0.348536	1290.39	-11.74	1290.39	-2.57296	1291.89	15.958	1341.73	13.9404	1312.53	15.0373	1157.96	4.54196	1161	-35.612	1262.72	3.26982	1301.81	23.6303	1258.21	-6.78582	1252.95	-23.1187	1252.2	0.801261	1252.2	59.4879
1252.88	-4.55517	1295.63	16.8392	1291.14	-28.038	1291.14	-15.0723	1292.64	-76.6431	1342.48	2.04542	1313.28	-2.66234	1158.72	6.05233	1161.77	-29.0032	1263.47	3.66923	1302.56	-8.60248	1258.96	-0.876011	1253.7	8.36778	1252.95	31.4943	1252.95	71.4909
1253.63	-19.7199	1296.38	6.34566	1291.89	-47.447	1291.89	2.81783	1293.39	2.86762	1343.22	-7.73396	1314.03	-16.2205	1159.48	7.14275	1162.53	-15.7973	1264.22	3.26596	1303.31	-50.9245	1259.72	3.1641	1254.45	55.9104	1253.7	-1.74392	1253.7	36.2159
1254.38	-32.7306	1297.13	-38.2814	1292.64	-40.962	1292.64	-3.54147	1294.14	69.2333	1343.97	-4.20496	1314.79	31.2578	1160.24	7.76531	1163.29	0.332069	1264.97	1.72652	1304.06	-207.787	1260.47	9.37649	1255.21	39.4073	1254.45	-45.0026	1254.45	-21.0803
1255.13	-38.5093	1297.87	-101.775	1293.39	-31.0281	1293.39	-33.77	1294.88	28.0304	1344.72	-30.8832	1315.53	1.72559	1161	8.51313	1164.05	8.49942	1265.73	1.91617	1304.81	-227.222	1261.22	11.8626	1255.96	-0.0536396	1255.21	-57.2195	1255.21	-64.8743
1255.89	-21.4087	1298.62	-128.281	1294.14	-42.7325	1294.14	-4.41496	1295.63	35.2651	1345.46	-9.19121	1316.28	12.1284	1161.77	14.4773	1164.81	20.9817	1266.48	1.82156	1305.56	-187.98	1261.97	7.70292	1256.71	-54.2833	1255.96	-57.1252	1255.96	-70.9844
1256.64	-9.22522	1299.37	-118.35	1294.88	-32.9836	1294.88	-2.28788	1296.38	37.788	1346.21	9.48969	1317.03	-67.4459	1162.53	25.7056	1165.57	20.6842	1267.23	2.59642	1306.32	-199.875	1262.72	16.1044	1257.46	-58.6102	1256.71	-28.5909	1256.71	-24.5023
1257.39	-1.16033	1300.12	-142.2	1295.63	-28.4078	1295.63	3.87405	1297.13	83.5112	1346.96	20.9107	1317.78	-14.347	1163.29	39.2547	1166.33	20.9741	1267.98	1.80615	1307.07	-91.4412	1263.47	11.6254	1258.21	-90.9907	1257.46	0.933234	1257.46	27.3661
1258.14	0.942052	1300.86	-151.178	1296.38	-53.3206	1296.38	1.46556	1297.87	131.287	1347.7	23.6935	1318.53	96.5837	1164.05	55.9683	1167.09	20.3637	1268.73	1.85153	1307.82	-150.119	1264.22	7.30134	1258.96	-122.012	1258.21	0.933234	1258.21	37.7667
1258.89	4.19903	1301.61	-159.056	1297.13	-44.9262	1297.13	-3.59995	1298.62	121.157	1348.45	1.5187	1319.28	0	1164.81	59.6742	1167.85	13.1388	1269.48	0.804825	1308.57	-136.631	1264.97	4.83394	1259.72	-155.573	1258.96	6.24984	1258.96	16.2315
1259.64	4.23349	1302.36	-164.607	1297.87	-5.88421	1297.87	-3.73517	1299.37	65.3478	1349.2	-22.4381	1320.03	16.0233	1165.57	46.965	1168.61	7.26904	1270.23	0.0723486	1309.32	-169.129	1265.73	4.18393	1260.47	-165.496	1259.72	37.1502	1259.72	3.26698
1260.4	-2.84913	1303.11	-135.154	1298.62	-8.54011	1298.62	8.55581	1300.12	5.01833	1349.94	-2.61603	1320.78	30.1239	1166.33	19.7046	1169.38	5.39755	1270.98	0.611325	1310.07	-51.7211	1266.48	-2.88953	1261.22	-143.003	1260.47	69.5966	1260.47	23.3961
1261.15	3.84288	1303.85	-156.573	1299.37	-55.8556	1299.37	0	1300.86	-5.56011	1350.69	62.5828	1321.53	0	1167.09	16.8754	1170.14	-0.992367	1271.73	0.342479	1310.82	-43.4372	1267.23	-1.56711	1261.97	-47.3459	1261.22	100.497	1261.22	81.3953
1261.9	15.0843	1304.6	-161.559	1300.12	-67.1298	1300.12	0.325274	1301.61	-4.51486	1351.44	156.742	1322.28	-92.9846	1167.85	28.4169	1170.9	-4.03281	1272.48	0.115587	1311.56	9.1335	1267.98	1.78004	1262.72	18.6845	1261.97	97.6596	1261.97	142.827
1262.65	16.8535	1305.35	-182.204	1300.86	-66.4081	1300.86	0.047512	1302.36	-21.6877	1352.18	236.259	1323.03	0	1168.61	33.6369	1171.66	1.52982	1273.23	-0.934967	1312.31	4.93846	1268.73	2.9026	1263.47	9.70878	1262.72	113.543	1262.72	172.043
1263.4	15.452	1306.09	-194.207	1301.61	-29.03	1301.61	-5.81108	1303.11	-67.7338	1352.93	302.783	1323.78	-9.7126	1169.38	29.2421	1172.42	6.32274	1273.98	-0.102744	1313.06	49.9156	1269.48	4.19888	1264.22	-22.4929	1263.47	94.0587	1263.47	156.97
1264.15	11.0691	1306.84	-168.147	1302.36	-42.7183	1302.36	3.1431	1303.85	2.56663	1353.67	320.262	1324.52	0	1170.14	20.7619	1173.18	8.81997	1274.73	0.0689238	1313.81	-10.5141	1270.23	1.55964	1264.97	-41.6601	1264.22	96.0383	1264.22	110.343
1264.9	6.34162	1307.59	-145.607	1303.11	-71.887	1303.11	-1.73967	1304.6	12.8879	1354.42	324.379	1325.27	28.7927	1170.9	9.99035	1173.94	3.65659	1275.48	1.81171	1314.56	150.968	1270.98	-1.43076	1265.73	-61.8644	1264.97	29.0339	1264.97	53.2228
1265.65	5.42254	1308.33	-37.06	1303.85	-72.758	1303.85	-6.76863	1305.35	2.84573	1355.17	281.153	1326.02	0.493026	1171.66	-1.03168	1174.7	5.10771	1276.23	1.54972	1315.31	110.983	1271.73	1.0217	1266.48	-116.38	1265.73	3.38415	1265.73	69.1544
1266.41	1.48775	1309.08	-9.86559	1304.6	-48.9225	1304.6	-2.51082	1306.09	10.0476	1355.91	267.915	1326.77	-60.7901	1172.42	-6.07117	1175.46	11.4324	1276.98	3.54765	1316.06	-42.4814	1272.48	5.67072	1267.23	-144.899	1266.48	5.24119	1266.48	59.0744
1267.16	1.78071	1309.83	-6.38311	1305.35	-28.5251	1305.35	4.62694	1306.84	38.8223	1356.66	269.934	1327.52	-5.6698	1173.18	-13.1294	1176.22	15.7128	1277.73	3.67651	1316.81	-195.892	1273.23	8.29315	1267.98	-137.764	1267.23	-21.125	1267.23	62.1346
1267.91	1.13736	1310.57	-6.1037	1306.09	-7.11083	1306.09	-6.99157	1307.59	72.67	1357.4	293.417	1328.27	-7.09957	1173.94	-11.2101	1176.98	15.4633	1278.48	3.42992	1317.56	-226.054	1273.98	4.99644	1268.73	-124.337	1267.98	-13.6309	1267.98	54.4014
1268.66	-0.172327	1311.32	-37.4259	1306.84	0.291544	1306.84	13.6067	1308.33	89.4051	1358.15	366.613	1329.02	0	1174.7	4.99876	1177.74	11.0754	1279.23	2.69317	1318.31	-134.241	1274.73	2.02846	1269.48	-67.8363	1268.73	12.5657	1268.73	19.5191
1269.41	-5.32489	1312.07	-51.1398	1307.59	20.913	1307.59	22.1625	1309.08	98.1119	1358.89	474.177	1329.76	-4.53584	1175.46	18.4595	1178.5	12.4286	1279.98	2.49667	1319.06	73.2804	1275.48	1.32616	1270.23	-54.9628	1269.48	27.158	1269.48	-18.1648
1270.16	7.97872	1312.81	-112.943	1308.33	11.1107	1308.33	1.48384	1309.83	97.51	1359.64	525.418	1330.51	-48.5137	1176.22	16.636	1179.26	9.61847	1280.73	2.02319	1319.81	277.297	1276.23	1.79311	1270.98	8.27838	1270.23	19.1737	1270.23	-0.672004
1270.91	-1.72901	1313.56	-113.98	1309.08	-1.41506	1309.08	-0.0767501	1310.57	69.6328	1360.38	507.896	1331.26	-3.00746	1176.98	16.8975	1180.02	6.41871	1281.48	0.811675	1320.56	281.439	1276.98	8.44632	1271.73	-3.82629	1270.98	17.5712	1270.98	40.5374
1271.66	-11.7125	1314.3	-115.302	1309.83	2.4639	1309.83	6.42143	1311.32	-1.09451	1361.13	545.574	1332.01	-8.03632	1177.74	16.6249	1180.78	0.00383894	1282.23	-0.384004	1321.31	365.818	1277.73	14.1058	1272.48	-57.0368	1271.73	35.1989	1271.73	48.5704
1272.41	-6.03143	1315.05	-46.58	1310.57	-15.7576	1310.57	7.02812	1312.07	-116.21	1361.87	578.212	1332.76	38.8504	1178.5	13.3426	1181.54	-4.09039	1282.98	1.55528	1322.05	425.876	1278.48	15.4581	1273.23	-78.8324	1272.48	64.7702	1272.48	36.2572
1273.16	-6.45076	1315.8	-34.4705	1311.32	-27.1563	1311.32	-11.6295	1312.81	-133.875	1362.62	620.069	1333.51	6.65585	1179.26	10.0382	1182.3	-7.09437	1283.73	3.03479	1322.8	325.779	1279.23	11.6478	1273.98	-82.5335	1273.23	23.8776	1273.23	36.3089
1273.91	-3.22825	1316.54	-25.8061	1312.07	0.188437	1312.07	-5.99016	1313.56	-78.3834	1363.36	689.007	1334.25	0.936749	1180.02	12.348	1183.06	-8.10785	1284.48	2.36524	1323.55	86.5027	1279.98	6.52992	1274.73	-84.1964	1273.98	8.23885	1273.98	78.8933
1274.66	2.32067	1317.29	-40.315	1312.81	-0.974184	1312.81	-63.4248	1314.3	-32.1348	1364.11	716.888	1335	87.0683	1180.78	9.61091	1183.82	-12.6532	1285.22	3.15209	1324.3	-124.311	1280.73	4.89558	1275.48	0.0178799	1274.73	-34.4165	1274.73	107.903
1275.41	3.23974	1318.03	13.7542	1313.56	17.1975	1313.56	-40.8895	1315.05	-0.191539	1364.85	741.653	1335.75	94.7102	1181.54	15.1625	1184.58	-18.6784	1285.97	1.19739	1325.05	-82.3077	1281.48	5.32518	1276.23	30.9322	1275.48	-33.7001	1275.48	139.074
1276.16	-0.166582	1318.78	17.1071	1314.3	26.495	1314.3	0	1315.8	22.9519	1365.6	837.199	1336.5	0	1182.3	29.0652	1185.34	-26.5252	1286.72	1.30142	1325.8	13.3285	1282.23	14.1152	1276.98	16.3243	1276.23	104.503	1276.23	164.021
1276.91	-13.8665	1319.52	17.1762	1315.05	20.7779	1315.05	6.7467	1316.54	23.5101	1366.34	858.321	1337.24	-93.7735	1183.06	37.818	1186.09	-31.1415	1287.47	1.39817	1326.55	103.124	1282.98	11.2798	1277.73	43.7699	1276.98	124.525	1276.98	124.238
1277.66	-28.6062	1320.27	1.11474	1315.8	33.3498	1315.8	5.29941	1317.29	-0.191539	1367.09	870.497	1337.99	-13.4596	1183.82	33.7069	1186.85	-34.134	1288.22	1.033	1327.29	211.186	1283.73	8.85537	1278.48	33.9718	1277.73	119.247	1277.73	87.3606
1278.41	-40.9046	1321.01	-2.55785	1316.54	54.8459	1316.54	-28.467	1318.03	-33.5084	1367.83	911.44	1338.74	-13.7061	1184.58	24.2726	1187.61	-23.454	1288.97	0.994473	1328.04	171.359	1284.48	5.72676	1279.23	-6.54404	1278.48	102.128	1278.48	68.9477
1279.16	-55.65	1321.76	-45.2867	1317.29	61.7362	1317.29	-33.1962	1318.78	-57.3633	1368.58	1028.49	1339.49	3.64839	1185.34	6.72647	1188.37	-21.667	1289.72	-0.000856197	1328.79	135.675	1285.22	1.15432	1279.98	-77.545	1279.23	90.0052	1279.23	87.4123
1279.91	-49.2222	1322.51	-46.2862	1318.03	60.4136	1318.03	-19.7504	1319.52	-52.241	1369.32	1128.36	1340.24	0	1186.09	6.66385	1189.13	-15.6878	1290.47	-0.618602	1329.54	216.761	1285.97	6.25349	1280.73	-125.696	1279.98	69.3515	1279.98	83.8662
1280.66	-44.9658	1323.25	-50.6213	1318.78	50.5011	1318.78	1.89682	1320.27	-1.63629	1370.06	1225.16	1340.98	85.4413	1186.85	13.3316	1189.89	-9.74708	1291.21	-1.35836	1330.29	194.936	1286.72	5.14586	1281.48	-114.288	1280.73	41.1	1280.73	-3.50476
1281.41	-46.2237	1323.99	-21.9808	1319.52	53.5588	1319.52	-1.28282	1321.01	7.10885	1370.81	1309.63	1341.73	101.563	1187.61	21.6939	1190.65	3.01933	1291.96	0.277836	1331.03	11.47	1287.47	1.43636	1282.23	-66.4416	1281.48	42.005	1281.48	-16.3762
1282.16	-46.8614	1324.74	-4.28901	1320.27	66.8027	1320.27	-5.5991	1321.76	-8.84365	1371.55	1363.35	1342.48	0.690236	1188.37	32.4617	1191.4	4.0808	1292.71	1.70897	1331.78	556.453	1288.22	-0.0130748	1282.98	-43.162	1282.23	48.5564	1282.23	-5.56213
1282.91	-36.8319	1325.48	3.30389	1321.01	75.5739	1321.01	-5.59545	1322.51	47.5948	1372.3	1441.58	1343.22	-69.8617	1189.13	39.4242	1192.16	-2.23235	1293.46	3.62086	1332.53	485.721	1288.97	-0.00373565	1283.73	-15.5555	1282.98	68.4654	1282.98	9.85262
1283.65	-29.7493	1326.23	-18.6827	1321.76	65.6116	1321.76	2.17824	1323.25	69.3865	1373.04	1530.93	1343.97	-1.33117	1189.89	51.8424	1192.92	-8.30939	1294.21	4.13372	1333.28	-41.5255	1289.72	-0.961931	1284.48	1.94891	1283.73	34.7182	1283.73	2.32617
1284.4	-29.8757	1326.97	3.1253	1322.51	67.7129	1322.51	5.62834	1323.99	43.9829	1373.78	1661.63	1344.72	-176.109	1190.65	61.6745	1193.68	-12.3787	1294.95	4.89145	1334.02	-333.797	1290.47	-2.83723	1285.22	17.8441	1284.48	31.6168	1284.48	-27.7693
1285.15	-22.2474	1327.72	-46.0125	1323.25	67.4569	1323.25	6.20579	1324.74	58.1185	1374.53	1822.48	1345.46	31.7509	1191.4	44.2537	1194.44	-21.9069	1295.7	3.60844	1334.77	-465.755	1291.21	-3.12114	1285.97	45.7725	1285.22	8.20115	1285.22	-19.1263
1285.9	-9.60434	1328.46	-81.4538	1323.99	92.2239	1323.99	-9.06382	1325.48	17.9062	1375.27	1984.04	1346.21	0	1192.16	36.2229	1195.2	-27.6078	1296.45	0.909709	1335.52	-562.453	1291.96	-1.70159	1286.72	72.7532	1285.97	25.3576	1285.97	-30.9639
1286.65	-9.03566	1329.21	-127.838	1324.74	121.428	1324.74	0.950239	1326.23	-18.6997	1376.02	2102.03	1346.96	-0.788841	1192.92	33.4232	1195.96	-24.2564	1297.2	0.0012843	1336.27	-521.353	1292.71	-0.0186783	1287.47	76.2398	1286.72	17.722	1286.72	-65.3602
1287.4	0.597399	1329.95	-182.08	1325.48	142.857	1325.48	28.0796	1326.97	-44.6889	1376.76	2223.86	1347.7	-11.6354	1193.68	24.5746	1196.71	-24.4003	1297.95	-2.82202	1337.01	-397.36	1293.46	-0.132616	1288.22	50.0458	1287.47	13.3858	1287.47	-46.7095
1288.15	3.91756	1330.7	-146.5	1326.23	164.783	1326.23	10.0872	1327.72	-42.9377	1377.5	2348.2	1348.45	47.5277	1194.44	28.1995	1197.47	-33.9574	1298.69	-8.73192	1337.76	-415.255	1294.21	1.3411	1288.97	22.1711	1288.22	18.1651	1288.22	-17.4928
1288.9	-6.40481	1331.44	-87.9521	1326.97	175.179	1326.97	5.40906	1328.46	-2.22733	1378.25	2546.85	1349.2	2.02141	1195.2	28.019	1198.23	-20.1698	1299.44	-4.27456	1338.51	-431.876	1294.95	0.397847	1289.72	-13.249	1288.97	21.6435	1288.97	-11.362
1289.64	-25.4412	1332.18	-22.9631	1327.72	160.179	1327.72	2.21479	1329.21	28.0687	1378.99	2709.68	1349.94	-90.4209	1195.96	20.5519	1198.99	-13.6609	1300.53	26.0362	1339.26	-444.143	1295.7	0.282042	1290.47	-23.959	1289.72	17.9011	1289.72	9.33569
1290.39	-26.3143	1332.93	-66.3112	1328.46	127.679	1328.46	29.2564	1329.95	71.1541	1379.73	2810.63	1350.69	-52.9016	1196.71	11.8581	1199.74	-13.2943	1301.28	11.8875	1340	-156.809	1296.45	-3.79356	1291.21	-34.0612	1290.47	38.2532	1290.47	2.01601
1291.14	-30.295	1333.67	-51.7303	1329.21	101.187	1329.21	40.8493	1330.7	132.644	1380.48	3182.26	1351.44	-24.109	1197.47	12.6501	1200.5	-17.3156	1302.03	-2.27413	1340.75	81.4049	1297.2	-7.72907	1291.96	-35.0267	1291.21	14.2436	1291.21	-3.33935
1291.89	-24.2636	1334.42	-90.2737	1329.95	92.0426	1329.95	25.3495	1331.44	168.741	1381.22	3378.6	1352.18	18.3899	1198.23	15.8624	1201.26	-21.9837	1302.78	-16.7976	1341.5	-110.133	1297.95	-12.1371	1292.71	-30.0024	1291.96	-40.0536	1291.96	-16.5727
1292.64	-19.8865	1335.16	-114.965	1330.7	75.6593	1330.7	-0.771156	1332.18	147.491	1381.96	3554.98	1352.93	144.654	1198.99	15.3319	1202.02	-23.4252	1303.53	-36.1923	1342.24	113.16	1298.69	-27.8941	1293.46	-2.52106	1292.71	-0.0188532	1292.71	-6.55463
1293.39	-16.2964	1335.91	-110.538	1331.44	80.5408	1331.44	-6.92578	1332.93	93.7613	1382.71	3701.99	1353.67	111.917	1199.74	20.9792	1202.77	-14.4018	1304.28	-2.79098	1342.99	53.7389	1299.44	-47.7211	1294.21	3.71902	1293.46	35.9908	1293.46	6.43057
1294.14	-12.3271	1336.65	-102.899	1332.18	98.3428	1332.18	-13.9064	1333.67	76.0794	1383.45	3692.75	1354.42	14.988	1200.5	22.0586	1203.53	-3.27654	1305.03	-0.801115	1343.74	-96.9637	1301.28	-0.639406	1294.95	0.0715195	1294.21	36.5564	1294.21	3.55645
1294.88	-10.2936	1337.39	-91.9473	1332.93	88.9565	1332.93	14.736	1334.42	45.7779	1384.19	3813.82	1355.17	-13.1145	1201.26	27.8201	1204.29	1.70449	1305.78	8.5926	1344.48	-187.608	1302.03	-7.49848	1295.7	-0.536396	1294.95	42.1086	1294.95	3.07054
1295.63	-10.3281	1338.14	-65.9655	1333.67	95.502	1333.67	0.687096	1335.16	-18.5301	1384.94	3892.14	1355.91	10.6001	1202.02	33.5227	1205.05	6.08856	1306.53	21.32	1345.23	-316.486	1302.78	-11.1024	1296.45	12.4623	1295.7	16.1949	1295.7	-0.372187
1296.38	-17.5888	1338.88	-81.6093	1334.42	92.7466	1334.42	-15.3537	1335.91	-21.5017	1385.68	3925.58	1356.66	-10.3535	1202.77	31.596	1205.8	8.36506	1307.28	15.5184	1345.98	-239.967	1303.53	-5.81278	1297.2	-26.4086	1296.45	-6.37239	1296.45	-20.0774
1297.13	-31.329	1339.62	-120.818	1335.16	105.464	1335.16	-52.4751	1336.65	-49.6853	1386.42	3982.97	1357.4	-81.2013	1203.53	25.3225	1206.56	4.87546	1308.03	-11.4353	1346.72	-310.167	1304.28	0.988172	1297.95	-5.57852	1297.2	-2.50748	1297.2	9.66653
1297.87	-46.2754	1340.37	-98.3131	1335.91	66.6392	1335.91	-50.6806	1337.39	-44.4481	1387.16	3980.9	1358.15	0	1204.29	22.6075	1207.32	3.91188	1308.78	-8.94147	1347.47	-404.741	1305.03	-0.639406	1298.69	15.2515	1297.95	-57.8134	1297.95	34.8409
1298.62	-53.0192	1341.11	-87.5632	1336.65	26.0256	1336.65	-22.0894	1338.14	-5.51086	1387.91	3977.03	1358.89	22.3341	1205.05	32.7196	1208.07	-0.165075	1309.53	-32.7682	1348.22	-342.984	1305.78	-2.55762	1299.44	27.392	1298.69	-185.167	1298.69	-2.56396
1299.37	-38.5839	1341.85	-132.115	1337.39	-20.4579	1337.39	4.87546	1338.88	-39.676	1388.65	3881.28	1359.64	68.432	1205.8	47.746	1208.83	0.589278	1310.28	-71.1312	1348.96	-249.844	1306.53	-5.81278	1310.28	70.5553	1299.44	-38.47	1299.44	-8.46726
1300.12	-45.1783	1342.6	-79.9358	1338.14	-7.92147	1338.14	40.4948	1339.62	18.7763	1389.39	3769.37	1360.38	-24.3555	1206.56	52.1334	1209.59	-4.61633	1311.03	92.1928	1349.71	-235.559	1307.28	-8.54478	1311.03	1.96377
1300.86	-50.911	1343.34	-35.0898	1338.88	-4.11362	1338.88	32.3995	1340.37	2.00843	1390.13	3662.87	1361.13	0	1207.32	54.8852	1210.34	-6.47246	1311.78	104.998	1350.45	-313.672	1308.03	-9.76547	1311.78	545.787
1301.61	-54.0129	1344.08	0.518483	1339.62	1.4115	1339.62	7.29491	1341.11	-30.1045	1390.87	3505.76	1361.87	-13.9033	1208.07	58.4254	1211.1	-5.61637	1312.53	43.7124	1351.2	-102.539	1308.78	1.22068	1312.53	257.814
1302.36	-55.5696	1344.82	-17.7264	1340.37	10.5027	1340.37	0	1341.85	-7.63421	1391.62	3331.65	1362.62	0	1208.83	52.0192	1211.86	-1.14209	1313.28	-13.9549	1351.94	86.3965	1309.53	-4.41771	1313.28	91.7359
1303.11	-41.278	1345.57	-52.9775	1341.11	37.5879	1341.11	-15.1929	1342.6	50.5062	1392.36	3160	1363.36	75.6301	1209.59	52.4723	1212.61	4.77373	1314.03	-31.8895	1352.69	159.73	1310.28	-10.7536	1314.03	-78.9714
1303.85	-20.5413	1346.31	-74.8287	1341.85	89.113	1341.85	-5.67951	1343.34	43.2058	1393.1	2997.04	1364.11	0	1210.34	48.3759	1213.37	9.50139	1314.79	-31.9541	1353.44	227.222	1311.03	0	1314.78	-204.512
1304.6	-11.8159	1347.05	-15.0648	1342.6	120.01	1342.6	5.68682	1344.08	4.36163	1393.84	2776.77	1364.85	60.3463	1211.1	45.3146	1214.13	7.76618	1315.53	-9.38079	1354.18	117.408	1311.78	7.44036	1315.53	0.841614
1305.35	1.59689	1347.8	25.0139	1343.34	139.803	1343.34	37.6368	1344.82	1.09451	1394.59	2571.27	1365.6	59.7547	1211.86	54.0822	1214.88	2.55482	1316.28	-0.839878	1354.93	-128.081	1312.53	6.04529	1316.28	-152.192
1306.09	2.46427	1348.54	44.676	1344.08	141.715	1344.08	40.7616	1345.57	-1.8552	1395.33	2363.51	1366.34	-28.9899	1212.61	59.8216	1215.64	2.56249	1317.03	9.52292	1355.67	-203.857	1313.28	1.22068	1317.03	27.9135
1306.84	0.172327	1349.28	55.0687	1344.82	138.853	1344.82	38.6857	1346.31	65.2821	1396.07	2124.98	1367.09	38.8504	1213.37	56.1672	1216.39	-1.14592	1317.78	21.2941	1356.42	-81.9891	1314.03	-5.05712	1317.78	62.4197
1307.59	5.84762	1350.02	38.6443	1345.57	123.007	1345.57	3.92522	1347.05	105.259	1396.81	1972.39	1367.83	-84.4553	1214.13	59.4679	1217.15	-7.49554	1318.53	35.5591	1357.16	-56.0754	1314.78	-2.84826	1318.53	91.0346
1308.33	14.8258	1350.77	54.7691	1346.31	104.899	1346.31	-34.7459	1347.8	122.53	1397.55	1801.65	1368.58	0	1214.88	58.0754	1217.9	-14.9892	1319.28	18.6841	1357.91	-54.6417	1315.53	-0.52315	1319.28	173.934
1309.08	9.71348	1351.51	99.1859	1347.05	101.955	1347.05	-7.30222	1348.54	147.212	1398.29	1673.06	1369.32	0	1215.64	51.5293	1218.66	-12.5917	1320.03	10.001	1358.65	-106.416	1316.28	0.639406	1320.03	370.731
1309.83	5.14108	1352.25	110.984	1347.8	117.841	1347.8	-9.14788	1349.28	175.992	1399.04	1540.22	1370.06	-57.684	1216.39	46.6261	1219.42	-24.9282	1320.78	24.7183	1359.4	-327.638	1317.03	-4.70835	1320.78	283.904
1310.57	-0.539957	1352.99	88.0615	1348.54	170.258	1348.54	-1.23531	1350.02	197.329	1399.78	1464.82	1370.81	13.8047	1217.15	43.5685	1220.17	-20.8378	1321.53	9.18697	1360.14	-492.996	1317.78	-12.73	1321.53	107.306
1311.32	-6.67478	1353.73	129.511	1349.28	193.009	1349.28	-0.632275	1350.77	159.492	1400.52	1364.76	1371.55	-21.6438	1217.9	49.82	1220.93	-4.68735	1322.28	-30.0547	1360.89	-534.894	1318.53	0	1322.27	-3.08592
1312.07	-12.3099	1354.47	81.857	1350.02	206.698	1350.02	-20.1451	1351.51	92.4971	1401.26	1229.59	1372.3	0	1218.66	46.9097	1221.68	6.15383	1323.03	-74.4649	1361.63	-461.029	1319.28	3.31328	1323.02	0
1312.81	-17.3992	1355.22	85.1062	1350.77	222.381	1350.77	-18.1496	1352.25	149.034	1402	1095.25	1373.04	-45.9007	1219.42	25.945	1222.44	14.6494	1323.78	-9.57461	1362.38	-376.279	1320.03	0.697533	1323.77	0
1313.56	-13.7	1355.96	69.2348	1351.51	274.969	1351.51	-3.49396	1352.99	172.095	1402.74	968.826	1373.78	-108.564	1220.17	7.30852	1223.19	18.9913	1324.52	19.9374	1363.12	-203.804	1320.78	4.12707	1324.52	0
1314.3	-18.5998	1356.7	64.2343	1352.25	306.907	1352.25	8.59967	1353.73	204.132	1403.48	857.926	1374.53	-8.77586	1220.93	6.44282	1223.95	20.5614	1325.27	-0.581454	1363.87	-52.8893	1321.53	-3.37141	1325.27	0
1315.05	-21.6212	1357.44	77.0294	1352.99	328.016	1352.99	17.6489	1354.47	227.806	1404.22	857.039	1375.27	80.659	1221.68	29.3599	1224.7	3.2036	1326.02	-89.4406	1364.61	75.5106	1322.27	-18.8915	1326.02	0
1315.8	-18.2322	1358.18	67.4201	1353.73	328.058	1353.73	39.9466	1355.22	233.525	1404.96	801.856	1376.02	117.587	1222.44	28.2658	1225.46	11.0734	1326.77	-41.2703	1365.36	-53.6858	1323.02	-9.12606	1326.76	0
1316.54	-17.6348	1358.93	33.736	1354.47	299.395	1354.47	42.7498	1355.96	277.853	1405.7	728.529	1376.76	-7.98702	1223.19	23.6795	1226.21	7.61838	1327.52	-23.9171	1366.1	71.8997	1323.77	0.639406	1327.51	-31.9813
1317.29	-8.77717	1359.67	25.5555	1355.22	255.247	1355.22	43.6927	1356.7	277.71	1406.45	627.566	1377.5	-33.1313	1223.95	25.9929	1226.97	1.78127	1328.27	-1.0983	1366.84	45.6675	1324.52	3.77831	1328.26	164.255
1318.03	-1.51073	1360.41	56.0596	1355.96	222.942	1355.96	14.9772	1357.44	275.171	1407.19	565.097	1378.25	29.5322	1224.7	32.6128	1227.72	3.09419	1329.02	-9.49708	1367.59	23.8958	1325.27	19.4728	1329.01	667.119
1318.78	-4.3771	1361.15	66.5387	1356.7	181.259	1356.7	3.79365	1358.18	286.089	1407.93	528.201	1378.99	1.08466	1225.46	38.8679	1228.48	11.7261	1329.76	-42.3686	1368.33	79.9181	1326.02	11.4512	1329.76	-61.2975
1319.52	-0.850145	1361.89	121.584	1357.44	155.489	1357.44	4.24684	1358.93	218.607	1408.67	463.142	1379.73	1.57768	1226.21	39.6563	1229.23	16.924	1330.51	-84.0524	1369.08	86.7151	1326.76	-4.1852	1330.5	-13.4658
[truncated: 1,077 more rows]

## Sheet: Na2Ca2(CO3)3 mode shifts
American Mineralogist: August 2025 Online Materials AM-25-89500 (use tabs to navigate to other tables)
[truncated: 62 more rows]
[truncated: 2 more columns]

## Sheet: Na2Ca2(CO3)3 spectra
American Mineralogist: August 2025 Online Materials AM-25-89500 (use tabs to navigate to other tables)
[truncated: 2,771 more rows]
